# Supplementary material for: The structure of the Ctf19c/CCAN from budding yeast
Source: eLife journal article supplement (doi:10.7554/elife.44239), 2019-02-14
Supplement: supp [file set3_s14_gfp.xls]

	Label	ID	TRACK_ID	QUALITY	POSITION_X	POSITION_Y	POSITION_Z	POSITION_T	FRAME	RADIUS	VISIBILITY	MANUAL_COLOR	MEAN_INTENSITY	MEDIAN_INTENSITY	MIN_INTENSITY	MAX_INTENSITY	TOTAL_INTENSITY	STANDARD_DEVIATION	ESTIMATED_DIAMETER	CONTRAST	SNR
1	ID38372703	38372703	0	5.121	77.886	43.352	0	0.000	0	0.500	1	-10921639	419.557	421	364	487	40697	25.417	1.787	0.015	0.500
2	ID38606413	38606413	0	10.670	79.585	41.838	0	480.376	1	0.500	1	-10921639	411.340	401	329	543	39900	43.537	0.481	0.035	0.634
3	ID38629741	38629741	0	10.382	80.276	41.509	0	960.752	2	0.500	1	-10921639	400.629	393	315	518	38861	40.306	1.812	0.035	0.677
4	ID38464128	38464128	0	9.122	79.539	41.837	0	1441.128	3	0.500	1	-10921639	407.784	403	335	531	39555	35.141	1.900	0.030	0.674
5	ID38617372	38617372	0	7.408	78.570	42.540	0	1921.504	4	0.500	1	-10921639	390.454	382	344	481	37874	30.515	0.478	0.022	0.557
6	ID38348489	38348489	0	6.638	78.830	42.121	0	2401.880	5	0.500	1	-10921639	384.464	383	287	493	37293	30.113	0.489	0.024	0.606
7	ID38443896	38443896	0	4.054	78.750	42.866	0	2882.256	6	0.500	1	-10921639	379.423	375	342	498	36804	24.441	1.900	0.019	0.567
8	ID38422699	38422699	0	4.190	79.119	43.718	0	3362.632	7	0.500	1	-10921639	373.928	373	296	461	36271	22.535	1.900	0.016	0.509
9	ID38517760	38517760	0	4.499	78.244	43.388	0	3843.008	8	0.500	1	-10921639	357.649	353	313	433	34692	24.611	1.627	0.008	0.238
10	ID38517847	38517847	0	4.024	78.993	43.872	0	4323.384	9	0.500	1	-10921639	346.206	344	292	453	33582	23.509	1.900	0.008	0.221
11	ID38363489	38363489	1	6.020	35.268	18.436	0	0.000	0	0.500	1	-10921639	389.072	384	340	484	37740	30.435	0.701	0.015	0.384
12	ID38594509	38594509	1	9.023	35.316	18.792	0	480.376	1	0.500	1	-10921639	398.608	388	335	543	38665	37.222	1.609	0.033	0.680
13	ID38619922	38619922	1	6.085	34.566	18.719	0	960.752	2	0.500	1	-10921639	389.784	385	346	460	37809	25.038	0.481	0.018	0.563
14	ID38452588	38452588	1	6.249	34.460	17.706	0	1441.128	3	0.500	1	-10921639	374.072	367	304	457	36285	29.219	1.900	0.022	0.549
15	ID38608112	38608112	1	5.302	34.287	18.765	0	1921.504	4	0.500	1	-10921639	367.660	367	324	430	35663	21.363	1.817	0.013	0.452
16	ID38346539	38346539	1	5.750	34.429	18.930	0	2401.880	5	0.500	1	-10921639	368.340	366	333	441	35729	22.093	0.481	0.014	0.471
17	ID38434724	38434724	1	3.862	34.196	18.789	0	2882.256	6	0.500	1	-10921639	355.835	353	305	417	34516	20.897	1.612	0.016	0.546
18	ID38417055	38417055	1	3.902	34.205	18.796	0	3362.632	7	0.500	1	-10921639	348.814	348	299	407	33835	19.966	0.489	0.006	0.220
19	ID38496138	38496138	1	4.465	34.074	18.795	0	3843.008	8	0.500	1	-10921639	337.186	334	292	400	32707	23.429	0.487	0.024	0.677
20	ID38385916	38385916	2	11.280	191.178	75.555	0	0.000	0	0.500	1	-10921639	439.959	431	341	599	42676	44.835	0.476	0.031	0.593
21	ID38622030	38622030	2	7.166	192.480	75.250	0	480.376	1	0.500	1	-10921639	398.124	391	305	481	38618	31.139	1.616	0.025	0.630
22	ID38649885	38649885	2	6.801	192.498	73.736	0	960.752	2	0.500	1	-10921639	395.598	392	322	469	38373	29.039	0.483	0.021	0.548
23	ID38476284	38476284	2	5.671	192.458	73.450	0	1441.128	3	0.500	1	-10921639	389.309	392	297	469	37763	28.554	1.900	0.016	0.434
24	ID38366442	38366442	3	6.076	92.965	36.911	0	0.000	0	0.500	1	-10921639	452.268	451	401	516	43870	25.464	1.599	0.016	0.555
25	ID38607817	38607817	3	5.877	94.584	36.461	0	480.376	1	0.500	1	-10921639	415.433	414	359	493	40297	23.353	1.400	0.019	0.664
26	ID38625911	38625911	3	4.854	94.659	36.005	0	960.752	2	0.500	1	-10921639	401.845	400	323	467	38979	25.012	1.608	0.009	0.272
27	ID38459448	38459448	3	4.350	94.556	35.934	0	1441.128	3	0.500	1	-10921639	399.629	398	332	460	38764	24.413	1.394	0.015	0.490
28	ID38615787	38615787	3	4.377	94.861	36.108	0	1921.504	4	0.500	1	-10921639	393.237	394	335	453	38144	20.903	0.709	0.013	0.474
29	ID38415858	38415858	4	6.014	178.046	214.439	0	0.000	0	0.500	1	-10921639	461.155	456	393	559	44732	29.094	1.900	0.009	0.277
30	ID38688330	38688330	4	7.914	179.556	213.231	0	480.376	1	0.500	1	-10921639	424.536	418	336	527	41180	33.973	0.482	0.022	0.536
31	ID38706478	38706478	4	8.304	178.918	215.729	0	960.752	2	0.500	1	-10921639	415.392	408	335	561	40293	36.402	1.900	0.024	0.532
32	ID38561740	38561740	4	10.311	180.237	214.622	0	1441.128	3	0.500	1	-10921639	420.361	416	331	523	40775	37.471	0.490	0.030	0.658
33	ID38702719	38702719	4	11.635	179.629	215.398	0	1921.504	4	0.500	1	-10921639	417.577	407	367	554	40505	42.638	1.900	0.028	0.526
34	ID38391695	38391695	4	9.771	179.665	214.559	0	2401.880	5	0.500	1	-10921639	412.784	404	354	543	40040	38.385	0.487	0.028	0.585
35	ID38561726	38561726	4	3.741	177.731	215.289	0	2882.256	6	0.500	1	-10921639	379.155	378	316	425	36778	19.669	0.706	0.009	0.360
36	ID38364354	38364354	5	4.537	92.840	22.534	0	0.000	0	0.500	1	-10921639	451.258	451	379	509	43772	24.708	1.900	0.005	0.195
37	ID38599370	38599370	5	4.555	93.284	23.119	0	480.376	1	0.500	1	-10921639	413.814	414	334	465	40140	21.775	0.711	0.012	0.449
38	ID38620399	38620399	5	4.642	93.923	22.587	0	960.752	2	0.500	1	-10921639	406.897	406	337	476	39469	23.316	0.917	0.019	0.647
39	ID38417510	38417510	6	8.118	171.662	216.637	0	0.000	0	0.500	1	-10921639	411.608	411	351	484	39926	30.273	1.602	0.021	0.569
40	ID38691781	38691781	6	6.737	172.379	216.455	0	480.376	1	0.500	1	-10921639	396.258	396	329	448	38437	24.986	1.900	0.017	0.536
41	ID38706596	38706596	6	5.964	172.425	216.472	0	960.752	2	0.500	1	-10921639	386.804	386	325	438	37520	23.954	1.777	0.018	0.575
42	ID38564712	38564712	6	6.388	172.421	216.241	0	1441.128	3	0.500	1	-10921639	383.423	386	326	436	37192	24.559	0.710	0.020	0.616
43	ID38703046	38703046	6	5.464	172.556	216.312	0	1921.504	4	0.500	1	-10921639	375.835	373	333	457	36456	20.803	0.710	0.010	0.371
44	ID38392179	38392179	6	6.666	172.401	216.531	0	2401.880	5	0.500	1	-10921639	372.608	373	311	421	36143	25.304	0.710	0.020	0.590
45	ID38562638	38562638	6	4.837	172.345	216.534	0	2882.256	6	0.500	1	-10921639	362.495	361	297	409	35162	23.237	1.794	0.016	0.485
46	ID38485200	38485200	6	5.960	172.422	216.548	0	3362.632	7	0.500	1	-10921639	358.258	359	294	412	34751	24.479	1.607	0.018	0.514
47	ID38606328	38606328	6	5.372	172.349	216.795	0	3843.008	8	0.500	1	-10921639	349.639	349	291	408	33915	23.489	0.722	0.018	0.521
48	ID38586415	38586415	6	5.451	172.140	216.896	0	4323.384	9	0.500	1	-10921639	334.691	335	284	398	32465	20.458	1.787	0.011	0.351
49	ID38406053	38406053	7	12.377	99.822	161.762	0	0.000	0	0.500	1	-10921639	531.639	528	444	702	51569	49.645	0.484	0.025	0.514
50	ID38663360	38663360	7	3.947	100.987	160.004	0	480.376	1	0.500	1	-10921639	426.619	426	382	482	41382	20.250	1.679	0.010	0.419
51	ID38687073	38687073	7	3.775	101.453	159.635	0	960.752	2	0.500	1	-10921639	410.866	408	350	461	39854	21.655	1.406	0.005	0.175
52	ID38406011	38406011	8	3.767	115.124	161.463	0	0.000	0	0.500	1	-10921639	457.670	457	361	530	44394	25.653	1.372	0.003	0.097
53	ID38665539	38665539	8	4.815	116.122	161.291	0	480.376	1	0.500	1	-10921639	420.402	423	324	488	40779	25.100	1.602	0.014	0.466
54	ID38687616	38687616	8	6.476	114.425	160.847	0	960.752	2	0.500	1	-10921639	422.216	418	359	502	40955	29.244	0.483	0.012	0.353
55	ID38531749	38531749	8	7.278	115.406	160.461	0	1441.128	3	0.500	1	-10921639	423.010	418	346	545	41032	33.730	0.482	0.021	0.517
56	ID38678238	38678238	8	4.984	115.528	161.201	0	1921.504	4	0.500	1	-10921639	411.289	410	338	475	39895	27.940	0.492	0.018	0.523
57	ID38377818	38377818	8	4.775	116.103	161.053	0	2401.880	5	0.500	1	-10921639	397.134	395	321	466	38522	26.578	1.601	0.018	0.526
58	ID38522731	38522731	8	3.640	116.079	160.598	0	2882.256	6	0.500	1	-10921639	379.474	379	315	452	36809	23.927	1.900	0.010	0.327
59	ID38417909	38417909	9	4.688	93.723	217.958	0	0.000	0	0.500	1	-10921639	482.753	487	398	547	46827	30.787	1.900	0.012	0.382
60	ID38693313	38693313	9	3.852	94.576	218.118	0	480.376	1	0.500	1	-10921639	425.680	428	343	473	41291	22.936	1.900	0.011	0.405
61	ID38706175	38706175	9	4.660	95.361	218.684	0	960.752	2	0.500	1	-10921639	405.299	402	328	492	39314	27.596	1.404	0.008	0.222
62	ID38563009	38563009	9	7.181	94.299	218.465	0	1441.128	3	0.500	1	-10921639	390.485	387	308	520	37877	34.225	0.483	0.023	0.511
63	ID38360338	38360338	10	3.724	13.202	13.310	0	0.000	0	0.500	1	-10921639	399.948	400	365	448	38795	19.533	1.900	0.006	0.252
64	ID38593372	38593372	10	7.973	15.374	12.172	0	480.376	1	0.500	1	-10921639	379.876	370	322	477	36848	32.210	0.486	0.023	0.532
65	ID38616072	38616072	10	6.317	14.881	10.970	0	960.752	2	0.500	1	-10921639	377.691	375	338	465	36636	26.431	0.708	0.018	0.510
66	ID38409902	38409902	11	5.136	185.725	193.349	0	0.000	0	0.500	1	-10921639	462.629	456	423	517	44875	23.748	1.594	0.007	0.290
67	ID38680158	38680158	11	4.304	186.661	193.415	0	480.376	1	0.500	1	-10921639	429.753	430	390	496	41686	19.599	1.679	0.012	0.519
68	ID38699950	38699950	11	3.874	186.637	193.316	0	960.752	2	0.500	1	-10921639	424.258	424	378	482	41153	22.360	1.608	0.011	0.408
69	ID38395876	38395876	12	6.177	197.545	107.011	0	0.000	0	0.500	1	-10921639	429.763	425	363	513	41687	25.224	1.900	0.023	0.754
70	ID38639961	38639961	12	5.587	197.727	106.827	0	480.376	1	0.500	1	-10921639	415.299	414	346	493	40284	25.778	0.480	0.014	0.449
71	ID38662140	38662140	12	4.600	197.969	106.965	0	960.752	2	0.500	1	-10921639	413.979	414	350	477	40156	22.629	1.822	0.013	0.477
72	ID38500261	38500261	12	3.816	197.611	106.747	0	1441.128	3	0.500	1	-10921639	406.711	405	334	451	39451	22.126	0.699	0.008	0.282
73	ID38694362	38694362	13	5.041	202.566	220.133	0	480.376	1	0.500	1	-10921639	384.567	380	344	476	37303	24.993	0.718	0.022	0.650
74	ID38706997	38706997	13	5.084	203.196	220.716	0	960.752	2	0.500	1	-10921639	376.876	375	275	491	36557	31.623	1.835	0.019	0.440
75	ID38563855	38563855	13	5.783	202.299	220.154	0	1441.128	3	0.500	1	-10921639	375.361	370	323	447	36410	26.029	0.487	0.016	0.453
76	ID38409647	38409647	14	5.600	162.409	190.127	0	0.000	0	0.500	1	-10921639	449.722	451	388	504	43623	24.158	1.789	0.018	0.657
77	ID38679259	38679259	14	4.053	163.547	189.881	0	480.376	1	0.500	1	-10921639	404.021	402	361	471	39190	23.057	1.225	0.010	0.353
78	ID38699373	38699373	14	3.712	163.385	189.762	0	960.752	2	0.500	1	-10921639	395.784	397	344	446	38391	20.580	1.797	0.009	0.361
79	ID38385890	38385890	15	5.002	73.595	75.538	0	0.000	0	0.500	1	-10921639	386.557	384	303	466	37496	32.848	1.900	0.012	0.290
80	ID38626011	38626011	15	6.560	73.484	75.649	0	480.376	1	0.500	1	-10921639	381.144	376	333	454	36971	28.147	0.482	0.023	0.612
81	ID38650522	38650522	15	6.648	73.565	75.506	0	960.752	2	0.500	1	-10921639	378.649	372	301	483	36729	33.344	1.900	0.018	0.410
82	ID38481057	38481057	15	4.661	73.529	75.329	0	1441.128	3	0.500	1	-10921639	368.485	366	301	443	35743	23.934	1.814	0.013	0.408
83	ID38633596	38633596	15	5.899	73.669	75.405	0	1921.504	4	0.500	1	-10921639	365.010	360	289	446	35406	27.338	1.900	0.021	0.545
84	ID38354961	38354961	15	4.686	73.594	75.498	0	2401.880	5	0.500	1	-10921639	356.330	354	280	458	34564	28.294	1.900	0.012	0.311
85	ID38461043	38461043	15	6.072	73.468	75.718	0	2882.256	6	0.500	1	-10921639	358.237	356	277	450	34749	29.479	1.787	0.023	0.547
86	ID38427380	38427380	15	5.323	73.473	75.613	0	3362.632	7	0.500	1	-10921639	347.340	343	292	441	33692	26.282	0.485	0.018	0.456
87	ID38538151	38538151	15	4.620	73.402	75.909	0	3843.008	8	0.500	1	-10921639	338.856	337	293	386	32869	22.313	0.772	0.015	0.443
88	ID38525626	38525626	15	5.291	73.246	75.878	0	4323.384	9	0.500	1	-10921639	326.649	323	274	394	31685	24.667	0.481	0.016	0.417
89	ID38367765	38367765	16	4.085	135.116	30.958	0	0.000	0	0.500	1	-10921639	438.557	436	385	523	42540	23.504	1.900	0.013	0.483
90	ID38602967	38602967	16	4.716	135.374	31.068	0	480.376	1	0.500	1	-10921639	412.268	409	353	472	39990	25.190	1.900	0.016	0.511
91	ID38628349	38628349	16	5.242	135.393	30.610	0	960.752	2	0.500	1	-10921639	406.351	403	334	464	39416	24.625	1.900	0.024	0.763
92	ID38365999	38365999	17	10.159	115.345	33.805	0	0.000	0	0.500	1	-10921639	470.515	467	393	592	45640	38.123	1.827	0.027	0.654
93	ID38602478	38602478	17	5.214	116.640	33.702	0	480.376	1	0.500	1	-10921639	419.392	417	333	485	40681	24.525	1.900	0.017	0.585
94	ID38635776	38635776	17	5.283	116.926	33.497	0	960.752	2	0.500	1	-10921639	409.247	410	321	489	39697	25.132	1.686	0.010	0.335
95	ID38459478	38459478	17	4.668	116.602	32.835	0	1441.128	3	0.500	1	-10921639	399.526	396	323	463	38754	26.267	1.794	0.017	0.510
96	ID38399287	38399287	18	7.043	65.805	118.938	0	0.000	0	0.500	1	-10921639	387.093	382	312	505	37548	35.887	0.486	0.028	0.579
97	ID38642414	38642414	18	7.239	66.500	118.711	0	480.376	1	0.500	1	-10921639	378.186	370	290	485	36684	34.952	1.900	0.025	0.538
98	ID38667094	38667094	18	5.830	66.531	118.590	0	960.752	2	0.500	1	-10921639	373.247	370	317	461	36205	30.565	0.487	0.026	0.616
99	ID38505465	38505465	18	5.445	66.521	118.417	0	1441.128	3	0.500	1	-10921639	368.330	367	257	450	35728	30.107	1.747	0.022	0.529
100	ID38655264	38655264	18	4.374	66.669	118.437	0	1921.504	4	0.500	1	-10921639	368.216	369	293	424	35717	23.990	0.709	0.012	0.350
101	ID38367377	38367377	18	3.777	66.537	118.618	0	2401.880	5	0.500	1	-10921639	358.320	357	275	427	34757	25.048	0.489	0.013	0.362
102	ID38489980	38489980	18	4.990	66.447	118.807	0	2882.256	6	0.500	1	-10921639	357.918	357	293	431	34718	27.966	0.494	0.010	0.254
103	ID38439184	38439184	18	5.038	66.501	118.694	0	3362.632	7	0.500	1	-10921639	347.928	350	274	425	33749	27.835	0.707	0.026	0.644
104	ID38405415	38405415	19	6.220	94.682	164.183	0	0.000	0	0.500	1	-10921639	402.299	397	321	471	39023	30.237	0.494	0.021	0.552
105	ID38668269	38668269	19	4.004	95.383	163.961	0	480.376	1	0.500	1	-10921639	386.103	384	323	445	37452	23.728	1.599	0.009	0.278
106	ID38688290	38688290	19	4.157	95.428	163.860	0	960.752	2	0.500	1	-10921639	378.639	378	313	444	36728	23.605	1.204	0.008	0.242
107	ID38535258	38535258	19	3.874	95.487	163.623	0	1441.128	3	0.500	1	-10921639	374.629	375	319	447	36339	22.868	0.702	0.008	0.270
108	ID38681736	38681736	19	3.965	95.547	163.653	0	1921.504	4	0.500	1	-10921639	369.918	367	302	460	35882	26.619	1.900	0.014	0.390
109	ID38395555	38395555	20	4.060	195.511	92.884	0	0.000	0	0.500	1	-10921639	412.402	413	328	466	40003	25.714	1.900	0.017	0.523
110	ID38630121	38630121	20	5.559	194.678	92.411	0	480.376	1	0.500	1	-10921639	393.557	392	348	460	38175	23.829	0.470	0.016	0.516
111	ID38652969	38652969	20	3.768	195.111	92.255	0	960.752	2	0.500	1	-10921639	386.722	388	341	443	37512	21.979	1.900	0.012	0.418
112	ID38394390	38394390	21	6.118	43.697	99.006	0	0.000	0	0.500	1	-10921639	426.093	424	317	539	41331	32.151	1.010	0.013	0.351
113	ID38637417	38637417	21	3.755	44.534	98.788	0	480.376	1	0.500	1	-10921639	401.701	399	323	478	38965	28.950	0.700	0.014	0.378
114	ID38659211	38659211	21	4.296	44.502	98.675	0	960.752	2	0.500	1	-10921639	397.196	394	298	468	38528	27.396	1.604	0.014	0.409
115	ID38496087	38496087	21	3.893	44.520	98.438	0	1441.128	3	0.500	1	-10921639	391.216	393	289	468	37948	29.917	1.900	0.014	0.371
116	ID38650077	38650077	21	3.947	44.593	98.398	0	1921.504	4	0.500	1	-10921639	384.948	389	293	451	37340	30.274	1.195	1.186E-4	0.003
117	ID38361954	38361954	21	3.992	44.656	98.709	0	2401.880	5	0.500	1	-10921639	386.402	388	303	463	37481	28.241	0.705	0.008	0.230
118	ID38669802	38669802	22	3.781	143.739	176.580	0	480.376	1	0.500	1	-10921639	402.093	404	310	452	39003	24.146	1.411	0.018	0.597
119	ID38694264	38694264	22	3.674	143.855	176.502	0	960.752	2	0.500	1	-10921639	399.887	402	320	448	38789	21.834	0.914	0.018	0.636
120	ID38418246	38418246	23	6.275	94.750	219.149	0	0.000	0	0.500	1	-10921639	469.155	467	388	551	45508	33.632	1.900	0.015	0.417
121	ID38693736	38693736	23	4.485	95.563	218.876	0	480.376	1	0.500	1	-10921639	413.227	416	346	484	40083	24.751	1.900	0.015	0.488
122	ID38706161	38706161	23	5.560	95.884	218.621	0	960.752	2	0.500	1	-10921639	405.887	403	343	492	39371	27.114	1.839	0.015	0.433
123	ID38562570	38562570	23	5.167	96.935	217.749	0	1441.128	3	0.500	1	-10921639	379.155	379	324	454	36778	27.044	1.900	0.017	0.468
124	ID38700969	38700969	23	5.844	96.011	218.138	0	1921.504	4	0.500	1	-10921639	386.979	383	336	477	37537	25.652	1.900	0.014	0.415
125	ID38392384	38392384	23	9.403	96.752	217.423	0	2401.880	5	0.500	1	-10921639	384.423	380	313	489	37289	36.138	0.484	0.032	0.660
126	ID38563000	38563000	23	8.156	96.871	217.005	0	2882.256	6	0.500	1	-10921639	365.701	363	280	487	35473	35.889	0.486	0.026	0.525
127	ID38379012	38379012	24	5.014	45.606	67.395	0	0.000	0	0.500	1	-10921639	447.691	444	380	522	43426	27.330	1.674	0.010	0.335
128	ID38616805	38616805	24	6.937	45.335	66.550	0	480.376	1	0.500	1	-10921639	416.701	416	318	502	40420	31.427	1.790	0.024	0.616
129	ID38642613	38642613	24	6.498	45.696	66.980	0	960.752	2	0.500	1	-10921639	411.124	408	337	498	39879	30.187	1.668	0.015	0.412
130	ID38474443	38474443	24	4.920	47.009	67.156	0	1441.128	3	0.500	1	-10921639	403.072	400	360	479	39098	22.470	1.220	0.012	0.424
131	ID38632315	38632315	24	4.159	47.342	67.511	0	1921.504	4	0.500	1	-10921639	391.629	392	329	482	37988	23.052	1.367	0.009	0.319
132	ID38354754	38354754	24	4.888	46.413	67.619	0	2401.880	5	0.500	1	-10921639	392.144	389	326	457	38038	28.358	1.610	0.008	0.227
133	ID38392543	38392543	25	8.802	198.763	88.240	0	0.000	0	0.500	1	-10921639	415.165	413	357	520	40271	33.087	0.485	0.023	0.570
134	ID38633312	38633312	25	5.008	198.947	87.856	0	480.376	1	0.500	1	-10921639	386.938	389	302	468	37533	24.615	1.598	0.012	0.366
135	ID38655950	38655950	25	6.572	198.619	88.643	0	960.752	2	0.500	1	-10921639	398.505	394	347	487	38655	28.306	1.900	0.019	0.521
136	ID38485757	38485757	25	6.906	198.017	88.102	0	1441.128	3	0.500	1	-10921639	390.402	386	339	468	37869	26.367	0.484	0.018	0.531
137	ID38639711	38639711	25	5.257	197.894	88.712	0	1921.504	4	0.500	1	-10921639	382.907	380	334	476	37142	25.496	1.600	0.017	0.510
138	ID38358749	38358749	25	4.710	197.889	88.836	0	2401.880	5	0.500	1	-10921639	373.897	374	301	446	36268	25.104	1.804	0.015	0.447
139	ID38474479	38474479	25	6.540	197.941	88.949	0	2882.256	6	0.500	1	-10921639	372.041	367	308	481	36088	32.523	1.900	0.014	0.321
140	ID38400741	38400741	26	4.575	94.739	132.655	0	0.000	0	0.500	1	-10921639	462.485	461	391	522	44861	26.759	1.900	0.015	0.507
141	ID38650339	38650339	26	6.193	95.098	132.329	0	480.376	1	0.500	1	-10921639	435.577	432	371	537	42251	31.295	1.900	0.019	0.514
142	ID38676001	38676001	26	6.475	95.558	131.670	0	960.752	2	0.500	1	-10921639	432.897	429	355	552	41991	32.595	0.490	0.016	0.421
143	ID38517342	38517342	26	6.576	96.500	130.922	0	1441.128	3	0.500	1	-10921639	419.082	416	306	508	40651	29.625	0.486	0.020	0.544
144	ID38665476	38665476	26	6.465	95.962	132.238	0	1921.504	4	0.500	1	-10921639	413.536	410	308	514	40113	34.744	1.900	0.013	0.296
145	ID38370764	38370764	26	5.233	94.764	132.642	0	2401.880	5	0.500	1	-10921639	403.722	401	343	485	39161	27.589	1.900	0.014	0.411
146	ID38509346	38509346	26	4.166	94.896	132.171	0	2882.256	6	0.500	1	-10921639	395.495	390	337	457	38363	25.671	0.711	0.015	0.455
147	ID38402795	38402795	27	4.056	116.603	141.620	0	0.000	0	0.500	1	-10921639	420.711	418	323	479	40809	28.641	1.900	0.013	0.365
148	ID38653565	38653565	27	5.662	117.481	142.167	0	480.376	1	0.500	1	-10921639	412.969	414	331	499	40058	28.626	0.483	0.014	0.387
149	ID38678952	38678952	27	4.169	116.161	141.340	0	960.752	2	0.500	1	-10921639	388.330	390	305	482	37668	26.047	0.481	0.012	0.347
150	ID38404337	38404337	28	6.017	85.091	159.037	0	0.000	0	0.500	1	-10921639	385.691	385	335	474	37412	27.418	0.493	0.019	0.536
151	ID38662783	38662783	28	5.482	85.829	158.755	0	480.376	1	0.500	1	-10921639	375.887	374	326	434	36461	22.604	1.598	0.016	0.537
152	ID38689664	38689664	28	5.734	85.859	158.679	0	960.752	2	0.500	1	-10921639	373.598	372	324	442	36239	22.311	0.493	0.016	0.533
153	ID38529766	38529766	28	3.738	85.901	158.347	0	1441.128	3	0.500	1	-10921639	367.206	365	319	464	35619	24.570	1.701	0.010	0.302
154	ID38675382	38675382	28	4.709	85.950	158.505	0	1921.504	4	0.500	1	-10921639	362.732	364	298	432	35185	24.980	1.598	0.019	0.554
155	ID38377572	38377572	28	4.416	85.914	158.674	0	2401.880	5	0.500	1	-10921639	358.155	358	303	414	34741	21.333	0.715	0.011	0.357
156	ID38520332	38520332	28	4.659	85.699	158.818	0	2882.256	6	0.500	1	-10921639	354.227	353	309	408	34360	21.391	1.813	0.014	0.451
157	ID38458598	38458598	28	5.898	85.798	158.773	0	3362.632	7	0.500	1	-10921639	351.247	350	308	419	34071	23.597	0.715	0.020	0.578
158	ID38584809	38584809	28	5.215	85.858	158.962	0	3843.008	8	0.500	1	-10921639	339.299	341	275	418	32912	26.372	1.401	0.022	0.564
159	ID38570656	38570656	28	5.144	85.598	158.914	0	4323.384	9	0.500	1	-10921639	327.309	324	272	392	31749	22.558	1.900	0.014	0.408
160	ID38369403	38369403	29	5.083	96.326	35.177	0	0.000	0	0.500	1	-10921639	469.546	474	392	560	45546	27.154	1.900	0.020	0.674
161	ID38603896	38603896	29	13.215	96.052	34.919	0	480.376	1	0.500	1	-10921639	440.237	426	375	636	42703	51.915	0.476	0.038	0.613
162	ID38635771	38635771	29	14.752	96.726	33.449	0	960.752	2	0.500	1	-10921639	429.959	416	312	573	41706	50.638	0.486	0.049	0.800
163	ID38459921	38459921	29	16.119	96.405	33.921	0	1441.128	3	0.500	1	-10921639	434.928	416	372	617	42188	56.765	0.481	0.038	0.567
164	ID38613371	38613371	29	11.183	96.209	34.511	0	1921.504	4	0.500	1	-10921639	421.247	410	350	547	40861	38.944	0.488	0.026	0.553
165	ID38347808	38347808	29	9.106	95.997	34.571	0	2401.880	5	0.500	1	-10921639	399.629	392	337	523	38764	36.154	1.900	0.025	0.543
166	ID38397282	38397282	30	4.943	89.820	114.286	0	0.000	0	0.500	1	-10921639	448.928	452	357	509	43546	27.712	0.490	0.007	0.231
167	ID38641784	38641784	30	4.229	90.575	113.918	0	480.376	1	0.500	1	-10921639	434.330	435	346	516	42130	25.195	1.797	0.008	0.277
168	ID38665836	38665836	30	3.844	90.387	113.556	0	960.752	2	0.500	1	-10921639	438.052	438	356	490	42491	22.735	1.407	0.007	0.282
169	ID38414846	38414846	31	4.701	48.224	202.923	0	0.000	0	0.500	1	-10921639	456.969	460	368	507	44326	22.144	1.604	0.010	0.413
170	ID38685689	38685689	31	4.359	49.493	202.974	0	480.376	1	0.500	1	-10921639	425.918	422	384	497	41314	19.187	1.599	0.008	0.336
171	ID38705128	38705128	31	4.390	49.750	202.599	0	960.752	2	0.500	1	-10921639	408.268	407	331	459	39602	22.953	1.786	0.018	0.617
172	ID38552556	38552556	31	4.965	49.914	201.105	0	1441.128	3	0.500	1	-10921639	388.907	386	314	489	37724	27.954	1.674	0.017	0.453
173	ID38695558	38695558	31	7.775	49.652	200.394	0	1921.504	4	0.500	1	-10921639	380.660	373	302	543	36924	37.016	0.485	0.025	0.511
174	ID38368439	38368439	32	5.880	185.963	38.121	0	0.000	0	0.500	1	-10921639	451.588	449	368	524	43804	28.637	1.583	0.009	0.282
175	ID38607477	38607477	32	7.355	186.818	38.794	0	480.376	1	0.500	1	-10921639	425.784	421	358	522	41301	33.895	1.773	0.014	0.349
176	ID38627443	38627443	32	7.812	187.335	38.509	0	960.752	2	0.500	1	-10921639	413.526	412	319	529	40112	31.821	0.483	0.025	0.641
177	ID38461159	38461159	32	9.433	187.356	38.026	0	1441.128	3	0.500	1	-10921639	410.505	404	358	555	39819	34.367	1.900	0.030	0.701
178	ID38619142	38619142	32	10.979	186.062	38.354	0	1921.504	4	0.500	1	-10921639	409.031	396	347	567	39676	39.521	0.485	0.034	0.675
179	ID38372052	38372052	33	7.394	16.836	51.748	0	0.000	0	0.500	1	-10921639	503.649	502	428	569	48854	28.033	1.606	0.021	0.724
180	ID38612596	38612596	33	6.606	17.592	51.774	0	480.376	1	0.500	1	-10921639	435.918	434	379	539	42284	25.148	1.587	0.021	0.711
181	ID38637428	38637428	33	5.246	17.201	52.430	0	960.752	2	0.500	1	-10921639	412.505	413	359	469	40013	21.836	1.818	0.011	0.427
182	ID38468795	38468795	33	4.200	17.147	52.507	0	1441.128	3	0.500	1	-10921639	398.649	399	320	455	38669	24.914	0.482	0.015	0.469
183	ID38623184	38623184	33	5.357	16.824	52.815	0	1921.504	4	0.500	1	-10921639	394.680	394	320	470	38284	25.059	0.493	0.013	0.409
184	ID38380797	38380797	34	7.083	49.908	62.522	0	0.000	0	0.500	1	-10921639	448.165	445	354	546	43472	35.395	1.900	0.014	0.354
185	ID38618871	38618871	34	5.604	50.595	62.082	0	480.376	1	0.500	1	-10921639	418.247	422	330	491	40570	31.604	1.900	0.016	0.408
186	ID38643022	38643022	34	5.505	50.452	62.046	0	960.752	2	0.500	1	-10921639	414.784	414	328	501	40234	31.894	1.785	0.019	0.496
187	ID38475536	38475536	34	4.496	51.204	61.837	0	1441.128	3	0.500	1	-10921639	410.732	406	347	476	39841	21.872	1.802	0.006	0.226
188	ID38383420	38383420	35	4.129	13.345	71.283	0	0.000	0	0.500	1	-10921639	427.392	427	361	491	41457	22.655	1.900	0.014	0.503
189	ID38625015	38625015	35	4.848	13.798	72.037	0	480.376	1	0.500	1	-10921639	404.464	406	348	465	39233	22.808	0.715	0.014	0.490
190	ID38649387	38649387	35	6.883	13.424	71.610	0	960.752	2	0.500	1	-10921639	401.485	399	344	480	38944	26.492	1.795	0.023	0.673
191	ID38406194	38406194	36	10.386	195.299	172.009	0	0.000	0	0.500	1	-10921639	429.278	424	336	592	41640	41.068	0.482	0.025	0.516
192	ID38674165	38674165	36	8.645	195.891	172.041	0	480.376	1	0.500	1	-10921639	397.876	394	343	549	38594	32.100	0.485	0.025	0.598
193	ID38695114	38695114	36	5.669	195.813	171.898	0	960.752	2	0.500	1	-10921639	369.392	364	318	441	35831	24.971	1.900	0.017	0.491
194	ID38413119	38413119	37	4.691	47.367	207.096	0	0.000	0	0.500	1	-10921639	419.928	421	346	493	40733	24.679	0.704	0.012	0.391
195	ID38686709	38686709	37	4.652	48.027	206.575	0	480.376	1	0.500	1	-10921639	396.990	396	353	458	38508	23.072	1.671	0.011	0.376
196	ID38703969	38703969	37	4.698	47.858	206.563	0	960.752	2	0.500	1	-10921639	389.969	388	335	462	37827	21.734	1.900	0.017	0.598
197	ID38555804	38555804	37	6.918	50.088	205.482	0	1441.128	3	0.500	1	-10921639	399.093	396	323	479	38712	26.840	1.617	0.022	0.626
198	ID38698077	38698077	37	8.175	50.729	206.442	0	1921.504	4	0.500	1	-10921639	386.402	379	332	474	37481	32.969	0.713	0.031	0.705
199	ID38390372	38390372	37	9.535	50.414	206.247	0	2401.880	5	0.500	1	-10921639	390.948	384	257	526	37922	38.804	0.479	0.027	0.521
200	ID38559477	38559477	37	6.796	49.862	205.701	0	2882.256	6	0.500	1	-10921639	382.258	379	312	465	37079	27.457	1.790	0.022	0.603
201	ID38481066	38481066	37	5.191	49.894	205.692	0	3362.632	7	0.500	1	-10921639	364.134	363	291	463	35321	24.306	1.426	0.021	0.617
202	ID38601858	38601858	37	4.410	50.056	206.231	0	3843.008	8	0.500	1	-10921639	348.546	345	237	431	33809	24.206	1.396	0.018	0.496
203	ID38587364	38587364	37	4.457	49.637	206.355	0	4323.384	9	0.500	1	-10921639	332.691	330	242	425	32271	24.958	1.900	0.016	0.415
204	ID38368723	38368723	38	6.125	217.013	38.479	0	0.000	0	0.500	1	-10921639	409.835	413	339	466	39754	28.132	0.488	0.019	0.555
205	ID38607375	38607375	38	3.875	217.827	38.354	0	480.376	1	0.500	1	-10921639	368.959	371	291	418	35789	22.698	1.627	0.013	0.429
206	ID38627311	38627311	38	4.083	218.142	38.280	0	960.752	2	0.500	1	-10921639	367.794	369	287	434	35676	25.035	0.707	0.010	0.301
207	ID38461356	38461356	38	4.049	218.465	38.300	0	1441.128	3	0.500	1	-10921639	353.804	353	281	451	34319	22.776	0.483	0.012	0.372
208	ID38619389	38619389	38	5.866	217.562	38.853	0	1921.504	4	0.500	1	-10921639	366.134	364	296	445	35515	26.781	0.489	0.020	0.544
209	ID38415457	38415457	39	8.799	129.755	206.692	0	0.000	0	0.500	1	-10921639	443.598	432	380	572	43029	35.708	0.487	0.022	0.544
210	ID38686732	38686732	39	10.290	131.201	206.603	0	480.376	1	0.500	1	-10921639	422.876	418	353	542	41019	37.422	1.900	0.030	0.665
211	ID38704126	38704126	39	10.542	130.805	207.533	0	960.752	2	0.500	1	-10921639	409.144	399	336	588	39687	43.098	0.467	0.030	0.560
212	ID38556229	38556229	39	10.921	131.121	206.224	0	1441.128	3	0.500	1	-10921639	410.371	397	359	553	39806	41.051	0.478	0.026	0.502
213	ID38402921	38402921	40	3.939	51.244	145.871	0	0.000	0	0.500	1	-10921639	477.392	476	362	549	46307	22.779	1.900	0.007	0.287
214	ID38661134	38661134	40	3.833	51.340	145.980	0	480.376	1	0.500	1	-10921639	423.691	426	329	477	41098	23.370	1.572	0.013	0.465
215	ID38683345	38683345	40	5.276	53.142	144.225	0	960.752	2	0.500	1	-10921639	410.639	410	352	509	39832	27.355	0.470	0.013	0.399
216	ID38521480	38521480	40	8.663	52.578	144.318	0	1441.128	3	0.500	1	-10921639	418.814	408	362	546	40625	35.379	0.482	0.024	0.566
217	ID38672066	38672066	40	8.645	53.051	143.880	0	1921.504	4	0.500	1	-10921639	406.309	399	324	540	39412	37.696	0.486	0.029	0.602
218	ID38374954	38374954	40	7.137	53.111	145.229	0	2401.880	5	0.500	1	-10921639	403.763	404	332	500	39165	28.053	1.900	0.026	0.717
219	ID38511918	38511918	40	4.236	52.672	145.065	0	2882.256	6	0.500	1	-10921639	388.196	389	333	436	37655	21.622	0.496	0.012	0.435
220	ID38374667	38374667	41	3.856	76.111	46.501	0	0.000	0	0.500	1	-10921639	412.928	411	305	472	40054	25.157	1.596	0.014	0.444
221	ID38609032	38609032	41	7.924	76.654	46.365	0	480.376	1	0.500	1	-10921639	403.340	397	354	560	39124	36.721	1.402	0.029	0.620
222	ID38633243	38633243	41	7.123	76.815	47.618	0	960.752	2	0.500	1	-10921639	385.866	379	305	510	37429	33.782	0.485	0.020	0.455
223	ID38464931	38464931	41	7.519	77.184	46.627	0	1441.128	3	0.500	1	-10921639	398.649	393	338	498	38669	29.750	0.489	0.028	0.733
224	ID38618508	38618508	41	6.581	78.502	47.089	0	1921.504	4	0.500	1	-10921639	377.021	372	320	503	36571	30.993	1.900	0.023	0.546
225	ID38613512	38613512	42	3.713	21.832	55.834	0	480.376	1	0.500	1	-10921639	405.897	406	328	453	39372	23.049	1.410	0.009	0.318
226	ID38646029	38646029	42	6.134	21.588	56.559	0	960.752	2	0.500	1	-10921639	415.619	412	353	497	40315	29.084	1.801	0.010	0.291
227	ID38469335	38469335	42	8.645	21.516	55.546	0	1441.128	3	0.500	1	-10921639	413.722	407	345	551	40131	35.082	0.485	0.023	0.528
228	ID38625311	38625311	42	10.255	21.441	55.846	0	1921.504	4	0.500	1	-10921639	413.093	401	315	560	40070	41.136	0.489	0.035	0.673
229	ID38351616	38351616	42	5.526	21.199	56.504	0	2401.880	5	0.500	1	-10921639	397.113	395	330	473	38520	24.965	1.638	0.016	0.488
230	ID38448482	38448482	42	6.111	21.124	57.064	0	2882.256	6	0.500	1	-10921639	388.670	384	343	485	37701	23.810	1.900	0.018	0.579
231	ID38424273	38424273	42	3.634	21.280	56.663	0	3362.632	7	0.500	1	-10921639	366.423	367	316	416	35543	21.572	1.900	0.008	0.276
232	ID38411460	38411460	43	4.521	60.771	199.378	0	0.000	0	0.500	1	-10921639	435.856	439	346	504	42278	27.362	1.397	0.008	0.249
233	ID38684683	38684683	43	8.921	61.330	199.394	0	480.376	1	0.500	1	-10921639	428.794	425	374	530	41593	30.121	1.795	0.024	0.668
234	ID38704472	38704472	43	7.271	61.303	198.478	0	960.752	2	0.500	1	-10921639	394.340	392	338	524	38251	32.775	0.483	0.022	0.527
235	ID38550265	38550265	43	7.423	60.657	198.381	0	1441.128	3	0.500	1	-10921639	387.969	380	315	516	37633	33.385	0.464	0.025	0.575
236	ID38695368	38695368	43	7.253	61.442	199.717	0	1921.504	4	0.500	1	-10921639	398.588	394	335	506	38663	27.561	1.810	0.014	0.387
237	ID38393492	38393492	43	3.774	61.585	199.429	0	2401.880	5	0.500	1	-10921639	381.010	382	317	425	36958	19.324	1.810	0.010	0.394
238	ID38549354	38549354	43	6.048	61.601	199.816	0	2882.256	6	0.500	1	-10921639	378.402	375	315	452	36705	25.251	1.900	0.026	0.746
239	ID38474609	38474609	43	4.840	61.812	199.834	0	3362.632	7	0.500	1	-10921639	364.938	363	310	428	35399	23.477	1.597	0.016	0.490
240	ID38599560	38599560	43	3.631	61.209	200.548	0	3843.008	8	0.500	1	-10921639	353.814	355	286	390	34320	17.711	1.783	0.009	0.373
241	ID38583958	38583958	43	4.318	61.016	200.797	0	4323.384	9	0.500	1	-10921639	338.113	338	260	414	32797	23.539	0.471	0.013	0.377
242	ID38418588	38418588	44	11.641	207.319	220.198	0	0.000	0	0.500	1	-10921639	497.216	489	422	627	48230	43.742	0.485	0.026	0.574
243	ID38693768	38693768	44	8.354	208.145	218.890	0	480.376	1	0.500	1	-10921639	434.691	433	374	533	42165	30.245	1.790	0.018	0.521
244	ID38706238	38706238	44	7.740	208.296	219.061	0	960.752	2	0.500	1	-10921639	411.546	410	341	501	39920	31.298	1.900	0.025	0.637
245	ID38563667	38563667	44	4.961	207.893	219.777	0	1441.128	3	0.500	1	-10921639	406.361	405	332	469	39417	24.567	1.725	0.013	0.410
246	ID38642442	38642442	45	42.648	28.533	118.631	0	480.376	1	0.500	1	-10921639	591.557	572	387	976	57381	127.138	0.713	0.092	0.781
247	ID38667077	38667077	45	42.864	28.583	118.599	0	960.752	2	0.500	1	-10921639	570.423	550	362	1004	55331	136.915	0.486	0.086	0.663
248	ID38505127	38505127	45	41.161	28.611	118.466	0	1441.128	3	0.500	1	-10921639	556.247	544	328	907	53956	130.208	0.483	0.094	0.734
249	ID38655379	38655379	45	37.303	28.592	118.474	0	1921.504	4	0.500	1	-10921639	532.526	531	321	899	51655	117.064	0.486	0.092	0.765
250	ID38367364	38367364	45	34.753	28.446	118.594	0	2401.880	5	0.500	1	-10921639	522.072	513	362	779	50641	101.913	0.485	0.080	0.760
251	ID38489734	38489734	45	33.610	28.401	118.776	0	2882.256	6	0.500	1	-10921639	517.381	508	296	832	50186	99.463	0.489	0.088	0.840
252	ID38439177	38439177	45	32.610	28.325	118.680	0	3362.632	7	0.500	1	-10921639	503.732	498	288	785	48862	96.844	0.714	0.082	0.785
253	ID38569009	38569009	45	33.001	28.234	118.960	0	3843.008	8	0.500	1	-10921639	489.918	473	339	697	47522	91.516	0.487	0.088	0.869
254	ID38549469	38549469	45	28.652	28.036	118.913	0	4323.384	9	0.500	1	-10921639	466.000	459	333	646	45202	78.360	0.492	0.087	0.951
255	ID38405834	38405834	46	16.123	146.986	163.569	0	0.000	0	0.500	1	-10921639	440.124	426	345	611	42692	56.147	0.488	0.045	0.676
256	ID38666372	38666372	46	10.929	147.565	163.190	0	480.376	1	0.500	1	-10921639	425.093	421	327	556	41234	44.776	1.900	0.033	0.607
257	ID38693205	38693205	46	12.547	147.730	163.148	0	960.752	2	0.500	1	-10921639	414.351	407	321	555	40192	48.828	0.477	0.044	0.717
258	ID38534991	38534991	46	14.822	147.727	163.023	0	1441.128	3	0.500	1	-10921639	413.567	399	272	584	40116	56.726	1.783	0.048	0.672
259	ID38681429	38681429	46	13.249	147.809	163.039	0	1921.504	4	0.500	1	-10921639	412.227	403	307	578	39986	50.901	0.487	0.034	0.529
260	ID38379207	38379207	46	11.096	147.748	163.200	0	2401.880	5	0.500	1	-10921639	396.340	391	276	530	38445	43.584	1.786	0.035	0.617
261	ID38519103	38519103	46	13.642	147.634	163.362	0	2882.256	6	0.500	1	-10921639	399.948	389	319	616	38795	50.165	1.392	0.034	0.527
262	ID38456227	38456227	46	13.021	147.619	163.269	0	3362.632	7	0.500	1	-10921639	395.567	385	318	550	38370	48.283	1.603	0.032	0.507
263	ID38585958	38585958	46	12.519	147.588	163.612	0	3843.008	8	0.500	1	-10921639	382.773	377	303	549	37129	41.889	1.900	0.037	0.644
264	ID38571545	38571545	46	10.138	147.364	163.668	0	4323.384	9	0.500	1	-10921639	367.629	367	294	467	35660	30.581	0.728	0.026	0.603
265	ID38370190	38370190	47	5.965	213.137	42.168	0	0.000	0	0.500	1	-10921639	444.567	441	372	508	43123	30.089	1.900	0.016	0.452
266	ID38609926	38609926	47	5.740	214.006	40.533	0	480.376	1	0.500	1	-10921639	397.206	394	297	480	38529	29.607	0.487	0.020	0.527
267	ID38629418	38629418	47	8.295	213.370	41.104	0	960.752	2	0.500	1	-10921639	383.320	377	298	490	37182	35.309	0.476	0.028	0.589
268	ID38464161	38464161	47	9.389	213.692	41.842	0	1441.128	3	0.500	1	-10921639	384.361	376	328	521	37283	34.983	0.486	0.032	0.688
269	ID38616775	38616775	47	6.944	214.045	41.277	0	1921.504	4	0.500	1	-10921639	384.144	380	316	479	37262	30.042	0.488	0.014	0.353
270	ID38348910	38348910	47	8.587	214.446	39.866	0	2401.880	5	0.500	1	-10921639	382.804	373	330	499	37132	31.869	0.486	0.024	0.574
271	ID38441101	38441101	47	5.806	215.453	40.274	0	2882.256	6	0.500	1	-10921639	364.041	360	312	449	35312	25.273	1.900	0.018	0.499
272	ID38421050	38421050	47	5.555	214.644	40.199	0	3362.632	7	0.500	1	-10921639	359.691	358	304	427	34890	22.865	1.644	0.021	0.633
273	ID38408370	38408370	48	5.435	107.481	182.313	0	0.000	0	0.500	1	-10921639	460.299	458	413	549	44649	25.461	1.802	0.012	0.441
274	ID38676254	38676254	48	7.667	108.817	180.779	0	480.376	1	0.500	1	-10921639	425.433	420	376	529	41267	29.020	1.657	0.019	0.559
275	ID38696517	38696517	48	10.512	108.630	181.051	0	960.752	2	0.500	1	-10921639	426.588	423	353	528	41379	38.485	0.487	0.025	0.542
276	ID38544782	38544782	48	9.682	109.277	180.694	0	1441.128	3	0.500	1	-10921639	406.113	399	335	524	39393	36.244	0.477	0.029	0.640
277	ID38690075	38690075	48	9.176	109.372	180.860	0	1921.504	4	0.500	1	-10921639	395.845	390	312	550	38397	38.559	0.477	0.026	0.512
278	ID38360198	38360198	49	12.933	86.987	13.070	0	0.000	0	0.500	1	-10921639	479.381	470	383	618	46500	47.629	0.484	0.028	0.545
279	ID38591262	38591262	49	13.049	87.558	12.271	0	480.376	1	0.500	1	-10921639	436.536	423	368	611	42344	49.820	0.479	0.032	0.541
280	ID38614066	38614066	49	8.297	88.152	13.338	0	960.752	2	0.500	1	-10921639	401.371	396	327	533	38933	35.305	0.488	0.026	0.576
281	ID38373733	38373733	50	3.730	108.914	45.669	0	0.000	0	0.500	1	-10921639	436.567	437	310	507	42347	28.504	1.900	0.006	0.175
282	ID38608927	38608927	50	5.300	110.486	46.122	0	480.376	1	0.500	1	-10921639	410.443	411	353	476	39813	25.844	0.486	0.012	0.382
283	ID38636747	38636747	50	5.420	109.631	46.335	0	960.752	2	0.500	1	-10921639	393.515	390	311	487	38171	31.934	1.900	0.014	0.338
284	ID38464432	38464432	50	3.887	110.117	45.737	0	1441.128	3	0.500	1	-10921639	397.031	397	299	464	38512	24.834	1.608	0.012	0.364
285	ID38618209	38618209	50	5.005	111.059	45.921	0	1921.504	4	0.500	1	-10921639	392.742	389	350	460	38096	25.688	1.632	0.010	0.314
286	ID38356166	38356166	51	3.871	221.134	2.790	0	0.000	0	0.500	1	-10921639	409.392	410	332	451	39711	21.968	1.613	0.004	0.140
287	ID38588312	38588312	51	5.727	221.758	2.600	0	480.376	1	0.500	1	-10921639	338.567	352	132	434	32841	63.137	1.786	0.055	0.557
288	ID38611925	38611925	51	4.306	220.925	4.414	0	960.752	2	0.500	1	-10921639	338.041	335	286	400	32790	22.489	1.771	0.018	0.540
289	ID38380350	38380350	52	4.603	17.882	57.856	0	0.000	0	0.500	1	-10921639	476.186	479	403	545	46190	26.017	1.637	0.010	0.368
290	ID38616472	38616472	52	4.306	18.082	57.637	0	480.376	1	0.500	1	-10921639	431.804	433	381	480	41885	21.621	1.672	0.011	0.425
291	ID38646263	38646263	52	4.532	18.524	57.103	0	960.752	2	0.500	1	-10921639	419.526	420	372	476	40694	20.501	0.716	0.016	0.639
292	ID38470230	38470230	52	8.071	18.100	57.304	0	1441.128	3	0.500	1	-10921639	427.072	424	337	535	41426	31.374	1.900	0.018	0.484
293	ID38625751	38625751	52	5.470	18.319	56.939	0	1921.504	4	0.500	1	-10921639	403.144	402	333	485	39105	24.645	1.794	0.013	0.430
294	ID38351663	38351663	52	3.890	18.211	56.762	0	2401.880	5	0.500	1	-10921639	393.237	392	351	448	38144	19.498	1.386	0.010	0.389
295	ID38451869	38451869	52	5.805	17.433	58.624	0	2882.256	6	0.500	1	-10921639	382.010	379	285	481	37055	29.604	1.900	0.015	0.391
296	ID38424457	38424457	52	9.202	17.523	59.018	0	3362.632	7	0.500	1	-10921639	377.629	370	294	497	36630	34.283	0.488	0.027	0.584
297	ID38525660	38525660	52	9.775	16.232	59.784	0	3843.008	8	0.500	1	-10921639	358.845	352	276	498	34808	39.986	0.479	0.032	0.563
298	ID38516848	38516848	52	7.446	16.277	59.485	0	4323.384	9	0.500	1	-10921639	341.278	337	291	479	33104	30.067	0.486	0.033	0.717
299	ID38401257	38401257	53	4.916	209.399	139.653	0	0.000	0	0.500	1	-10921639	446.794	448	391	505	43339	26.966	1.794	0.009	0.296
300	ID38654616	38654616	53	3.909	208.974	138.862	0	480.376	1	0.500	1	-10921639	418.557	417	378	464	40600	19.356	1.900	0.008	0.322
301	ID38677074	38677074	53	4.171	209.287	138.452	0	960.752	2	0.500	1	-10921639	402.804	401	308	466	39072	24.237	1.900	0.009	0.291
302	ID38404016	38404016	54	11.093	9.858	157.091	0	0.000	0	0.500	1	-10921639	447.691	439	359	588	43426	40.515	0.485	0.027	0.573
303	ID38662296	38662296	54	9.442	9.659	157.889	0	480.376	1	0.500	1	-10921639	426.495	419	373	571	41370	34.611	1.820	0.024	0.575
304	ID38689287	38689287	54	6.330	9.241	157.972	0	960.752	2	0.500	1	-10921639	410.093	407	320	492	39779	28.900	1.900	0.014	0.394
305	ID38365254	38365254	55	5.497	167.050	28.634	0	0.000	0	0.500	1	-10921639	367.299	362	320	430	35628	23.894	1.900	0.019	0.580
306	ID38601364	38601364	55	7.874	167.864	28.347	0	480.376	1	0.500	1	-10921639	362.979	356	269	458	35209	36.433	0.487	0.024	0.462
307	ID38624492	38624492	55	3.864	167.783	28.415	0	960.752	2	0.500	1	-10921639	350.351	346	296	433	33984	23.509	1.764	0.009	0.255
308	ID38458018	38458018	55	3.803	167.782	28.133	0	1441.128	3	0.500	1	-10921639	347.990	348	248	446	33755	26.122	0.978	0.020	0.526
309	ID38385198	38385198	56	3.839	136.388	80.101	0	0.000	0	0.500	1	-10921639	447.505	448	387	520	43408	25.295	1.900	0.014	0.473
310	ID38625428	38625428	56	3.970	138.076	77.737	0	480.376	1	0.500	1	-10921639	406.186	406	352	467	39400	21.311	1.900	0.013	0.496
311	ID38647873	38647873	56	4.232	138.346	78.058	0	960.752	2	0.500	1	-10921639	399.402	397	340	458	38742	22.459	0.705	0.014	0.474
312	ID38656532	38656532	57	8.496	126.325	140.570	0	480.376	1	0.500	1	-10921639	421.402	416	354	514	40876	31.420	0.488	0.023	0.606
313	ID38678772	38678772	57	6.800	126.107	140.757	0	960.752	2	0.500	1	-10921639	447.598	452	341	522	43417	36.821	0.492	0.013	0.311
314	ID38522051	38522051	57	9.729	126.385	140.425	0	1441.128	3	0.500	1	-10921639	494.536	500	391	603	47970	44.330	0.712	0.017	0.377
315	ID38667282	38667282	57	14.564	126.539	140.369	0	1921.504	4	0.500	1	-10921639	549.515	556	425	649	53303	52.569	0.713	0.027	0.541
316	ID38373234	38373234	57	15.685	126.619	140.415	0	2401.880	5	0.500	1	-10921639	571.052	593	398	679	55392	67.673	1.900	0.029	0.483
317	ID38506561	38506561	57	16.121	126.814	140.594	0	2882.256	6	0.500	1	-10921639	585.134	602	412	730	56758	64.026	1.391	0.032	0.559
318	ID38446693	38446693	57	18.003	126.854	140.552	0	3362.632	7	0.500	1	-10921639	591.711	617	408	722	57396	81.233	1.593	0.036	0.505
319	ID38578569	38578569	57	22.971	126.713	140.867	0	3843.008	8	0.500	1	-10921639	621.969	649	418	795	60331	88.003	0.714	0.044	0.593
320	ID38401798	38401798	58	13.537	127.877	143.162	0	0.000	0	0.500	1	-10921639	448.041	436	346	629	43460	55.896	0.484	0.037	0.566
321	ID38653718	38653718	58	15.687	126.832	142.653	0	480.376	1	0.500	1	-10921639	481.526	473	386	621	46708	47.636	0.710	0.041	0.789
322	ID38680343	38680343	58	8.836	127.013	142.320	0	960.752	2	0.500	1	-10921639	488.093	490	368	578	47345	37.433	0.914	0.025	0.626
323	ID38520244	38520244	58	11.363	126.980	142.119	0	1441.128	3	0.500	1	-10921639	533.619	538	363	628	51761	45.203	1.900	0.016	0.372
324	ID38667861	38667861	58	14.801	126.512	141.974	0	1921.504	4	0.500	1	-10921639	577.918	593	412	668	56058	55.500	1.392	0.030	0.600
325	ID38668051	38668051	58	13.986	127.087	142.113	0	1921.504	4	0.500	1	-10921639	573.093	588	443	682	55590	56.454	0.712	0.027	0.527
326	ID38373712	38373712	58	17.142	126.338	142.021	0	2401.880	5	0.500	1	-10921639	612.196	632	412	729	59383	68.391	0.710	0.028	0.483
327	ID38373650	38373650	58	16.575	127.076	142.252	0	2401.880	5	0.500	1	-10921639	611.010	629	462	697	59268	60.776	0.719	0.027	0.526
328	ID38449020	38449020	58	4.652	128.597	143.984	0	3362.632	7	0.500	1	-10921639	400.567	399	342	469	38855	23.432	0.487	0.010	0.324
329	ID38577704	38577704	58	4.228	128.698	144.577	0	3843.008	8	0.500	1	-10921639	381.289	381	329	424	36985	22.718	1.821	0.017	0.554
330	ID38373128	38373128	59	10.022	40.504	44.329	0	0.000	0	0.500	1	-10921639	476.907	468	419	616	46260	39.460	0.474	0.023	0.536
331	ID38604689	38604689	59	11.607	41.229	43.332	0	480.376	1	0.500	1	-10921639	432.526	420	366	609	41955	45.989	0.479	0.033	0.602
332	ID38630611	38630611	59	8.062	40.427	44.300	0	960.752	2	0.500	1	-10921639	420.216	413	373	529	40761	34.318	1.900	0.020	0.486
333	ID38378798	38378798	60	3.797	49.928	67.459	0	0.000	0	0.500	1	-10921639	438.495	437	369	510	42534	26.246	1.820	0.009	0.296
334	ID38620591	38620591	60	5.476	51.746	68.754	0	480.376	1	0.500	1	-10921639	397.557	394	337	481	38563	30.752	1.589	0.014	0.367
335	ID38643954	38643954	60	4.967	51.601	68.659	0	960.752	2	0.500	1	-10921639	395.742	393	329	462	38387	24.139	0.473	0.014	0.454
336	ID38476964	38476964	60	4.079	51.668	68.228	0	1441.128	3	0.500	1	-10921639	392.165	389	342	457	38040	22.557	1.772	0.007	0.245
337	ID38363247	38363247	61	9.752	86.362	17.649	0	0.000	0	0.500	1	-10921639	435.866	430	337	559	42279	35.291	1.900	0.028	0.665
338	ID38594475	38594475	61	8.894	86.632	16.778	0	480.376	1	0.500	1	-10921639	405.897	398	331	540	39372	35.193	0.484	0.018	0.412
339	ID38616580	38616580	61	7.168	86.788	16.739	0	960.752	2	0.500	1	-10921639	394.784	390	330	476	38294	28.660	0.485	0.020	0.551
340	ID38451789	38451789	61	6.699	86.554	16.327	0	1441.128	3	0.500	1	-10921639	400.165	396	345	473	38816	27.575	1.702	0.023	0.650
341	ID38605491	38605491	61	5.611	87.299	16.365	0	1921.504	4	0.500	1	-10921639	386.237	384	338	446	37465	25.272	0.490	0.014	0.411
342	ID38345568	38345568	61	5.011	87.154	16.333	0	2401.880	5	0.500	1	-10921639	377.515	377	294	480	36619	28.060	1.900	0.018	0.478
343	ID38439004	38439004	61	4.792	86.861	16.750	0	2882.256	6	0.500	1	-10921639	372.567	370	311	431	36139	23.050	1.790	0.016	0.520
344	ID38413304	38413304	62	3.733	178.207	207.628	0	0.000	0	0.500	1	-10921639	476.031	475	380	545	46175	25.825	1.805	0.013	0.476
345	ID38687142	38687142	62	5.075	178.998	207.488	0	480.376	1	0.500	1	-10921639	437.072	436	361	510	42396	25.702	1.786	0.015	0.500
346	ID38704100	38704100	62	4.775	178.046	207.345	0	960.752	2	0.500	1	-10921639	424.402	424	376	507	41167	23.398	1.805	0.008	0.287
347	ID38560628	38560628	62	7.825	178.851	207.842	0	1441.128	3	0.500	1	-10921639	421.258	418	354	554	40862	30.262	0.486	0.020	0.545
348	ID38700349	38700349	62	8.124	177.893	208.395	0	1921.504	4	0.500	1	-10921639	403.155	395	326	525	39106	35.686	1.612	0.020	0.454
349	ID38390861	38390861	62	8.868	177.817	208.262	0	2401.880	5	0.500	1	-10921639	401.773	392	342	514	38972	36.409	0.482	0.020	0.432
350	ID38553840	38553840	62	5.968	178.188	207.494	0	2882.256	6	0.500	1	-10921639	399.196	395	339	463	38722	24.749	1.840	0.019	0.597
351	ID38399951	38399951	63	7.003	42.690	125.523	0	0.000	0	0.500	1	-10921639	506.959	510	438	574	49175	28.348	1.395	0.013	0.461
352	ID38644903	38644903	63	4.272	43.752	125.570	0	480.376	1	0.500	1	-10921639	442.887	445	380	506	42960	23.460	1.900	0.008	0.310
353	ID38672619	38672619	63	4.771	42.859	125.731	0	960.752	2	0.500	1	-10921639	411.814	407	354	471	39946	22.940	1.900	0.011	0.400
354	ID38509457	38509457	63	4.553	42.809	125.616	0	1441.128	3	0.500	1	-10921639	406.000	404	319	505	39382	27.128	1.900	0.011	0.334
355	ID38659326	38659326	63	5.504	42.609	124.897	0	1921.504	4	0.500	1	-10921639	405.938	406	320	488	39376	29.509	0.489	0.013	0.353
356	ID38379590	38379590	64	7.285	50.001	59.611	0	0.000	0	0.500	1	-10921639	391.454	389	339	509	37971	32.237	1.607	0.017	0.400
357	ID38614307	38614307	64	4.827	50.742	59.363	0	480.376	1	0.500	1	-10921639	375.474	375	326	445	36421	23.282	1.900	0.014	0.442
358	ID38640186	38640186	64	4.979	50.763	59.263	0	960.752	2	0.500	1	-10921639	371.454	369	323	434	36031	24.559	0.476	0.006	0.171
359	ID38472353	38472353	64	6.338	50.800	59.083	0	1441.128	3	0.500	1	-10921639	373.186	371	284	433	36199	26.460	0.483	0.020	0.555
360	ID38628392	38628392	64	4.980	50.842	59.098	0	1921.504	4	0.500	1	-10921639	364.557	363	324	440	35362	23.265	0.481	0.013	0.392
361	ID38352039	38352039	64	5.636	50.786	59.208	0	2401.880	5	0.500	1	-10921639	363.670	363	315	447	35276	24.824	1.804	0.008	0.223
362	ID38452375	38452375	64	4.892	50.666	59.456	0	2882.256	6	0.500	1	-10921639	354.134	353	307	409	34351	23.500	1.729	0.013	0.393
363	ID38424493	38424493	64	4.790	50.733	59.390	0	3362.632	7	0.500	1	-10921639	349.577	350	303	406	33909	24.372	0.725	0.018	0.494
364	ID38525503	38525503	64	4.504	50.580	59.683	0	3843.008	8	0.500	1	-10921639	337.402	337	281	388	32728	21.299	0.491	0.021	0.646
365	ID38514110	38514110	64	4.683	50.456	59.680	0	4323.384	9	0.500	1	-10921639	324.134	321	282	394	31441	23.925	0.717	0.020	0.542
366	ID38410466	38410466	65	6.587	208.214	187.214	0	0.000	0	0.500	1	-10921639	420.340	415	351	522	40773	32.493	0.322	0.019	0.491
367	ID38677665	38677665	65	7.227	208.510	186.666	0	480.376	1	0.500	1	-10921639	394.392	388	310	503	38256	31.335	1.816	0.017	0.430
368	ID38700984	38700984	65	8.362	209.002	186.916	0	960.752	2	0.500	1	-10921639	399.155	394	306	501	38718	34.708	0.489	0.021	0.462
369	ID38417232	38417232	66	6.085	204.191	211.072	0	0.000	0	0.500	1	-10921639	458.825	461	385	520	44506	27.635	1.776	0.012	0.390
370	ID38689825	38689825	66	3.963	204.649	211.560	0	480.376	1	0.500	1	-10921639	418.052	420	335	485	40551	20.330	1.396	0.012	0.498
371	ID38705838	38705838	66	4.189	204.571	211.822	0	960.752	2	0.500	1	-10921639	406.052	408	299	449	39387	23.445	1.900	0.014	0.468
372	ID38559239	38559239	66	4.943	204.578	211.647	0	1441.128	3	0.500	1	-10921639	399.959	401	311	457	38796	25.605	0.710	0.013	0.399
373	ID38698704	38698704	66	6.327	205.025	209.829	0	1921.504	4	0.500	1	-10921639	376.691	373	306	468	36539	27.157	1.785	0.021	0.578
374	ID38391148	38391148	66	10.812	204.276	209.419	0	2401.880	5	0.500	1	-10921639	381.082	373	308	535	36965	41.586	0.487	0.034	0.597
375	ID38551499	38551499	66	11.233	203.571	209.085	0	2882.256	6	0.500	1	-10921639	369.082	360	310	537	35801	44.057	0.474	0.035	0.569
376	ID38483225	38483225	66	11.370	204.296	209.555	0	3362.632	7	0.500	1	-10921639	370.814	358	303	531	35969	44.450	0.476	0.033	0.526
377	ID38409215	38409215	67	9.334	56.658	187.437	0	0.000	0	0.500	1	-10921639	445.062	436	358	583	43171	40.680	1.900	0.023	0.493
378	ID38677948	38677948	67	8.586	57.688	187.359	0	480.376	1	0.500	1	-10921639	423.990	417	363	551	41127	36.065	0.482	0.024	0.558
379	ID38698695	38698695	67	6.925	58.659	187.591	0	960.752	2	0.500	1	-10921639	416.979	413	345	517	40447	30.582	1.698	0.017	0.443
380	ID38369202	38369202	68	10.002	39.500	35.424	0	0.000	0	0.500	1	-10921639	435.165	428	347	554	42211	38.664	1.800	0.033	0.711
381	ID38603966	38603966	68	9.331	40.545	35.117	0	480.376	1	0.500	1	-10921639	418.113	411	284	545	40557	40.934	0.494	0.025	0.503
382	ID38633686	38633686	68	9.456	40.913	35.885	0	960.752	2	0.500	1	-10921639	416.526	411	345	514	40403	35.236	0.477	0.027	0.612
383	ID38459972	38459972	68	12.547	40.704	34.127	0	1441.128	3	0.500	1	-10921639	422.546	413	358	600	40987	46.068	0.476	0.034	0.604
384	ID38613308	38613308	68	10.282	41.200	34.391	0	1921.504	4	0.500	1	-10921639	413.144	407	357	523	40075	35.531	0.488	0.028	0.626
385	ID38349297	38349297	68	7.340	40.748	33.864	0	2401.880	5	0.500	1	-10921639	394.351	388	304	479	38252	29.799	0.478	0.022	0.575
386	ID38443522	38443522	68	7.372	40.733	34.433	0	2882.256	6	0.500	1	-10921639	390.526	388	306	489	37881	28.593	1.388	0.032	0.848
387	ID38421885	38421885	68	7.881	41.455	34.078	0	3362.632	7	0.500	1	-10921639	379.969	376	305	457	36857	29.506	1.603	0.030	0.757
388	ID38504694	38504694	68	4.479	41.183	34.190	0	3843.008	8	0.500	1	-10921639	354.959	356	316	408	34431	19.078	1.771	0.011	0.400
389	ID38383024	38383024	69	8.242	190.871	70.202	0	0.000	0	0.500	1	-10921639	407.608	406	290	512	39538	36.271	0.485	0.024	0.521
390	ID38622648	38622648	69	7.148	191.429	70.127	0	480.376	1	0.500	1	-10921639	392.629	393	316	496	38085	29.582	1.900	0.023	0.585
391	ID38644930	38644930	69	3.673	190.973	70.166	0	960.752	2	0.500	1	-10921639	373.773	374	267	449	36256	25.382	1.900	0.008	0.247
392	ID38475175	38475175	69	4.232	191.032	70.403	0	1441.128	3	0.500	1	-10921639	380.021	381	316	432	36862	18.045	1.187	0.008	0.320
393	ID38366274	38366274	70	4.714	96.292	36.784	0	0.000	0	0.500	1	-10921639	440.928	440	377	511	42770	28.531	1.900	0.017	0.523
394	ID38609333	38609333	70	6.110	97.616	39.009	0	480.376	1	0.500	1	-10921639	394.247	389	331	474	38242	25.694	0.476	0.017	0.507
395	ID38628803	38628803	70	14.383	97.389	39.531	0	960.752	2	0.500	1	-10921639	413.351	397	350	619	40095	54.851	0.479	0.044	0.635
396	ID38461486	38461486	70	13.127	97.164	38.709	0	1441.128	3	0.500	1	-10921639	411.340	398	322	590	39900	47.899	0.486	0.042	0.692
397	ID38619043	38619043	70	9.854	97.765	38.621	0	1921.504	4	0.500	1	-10921639	392.227	381	300	510	38046	39.037	0.485	0.031	0.606
398	ID38348620	38348620	70	8.791	97.185	38.142	0	2401.880	5	0.500	1	-10921639	385.443	376	307	508	37388	35.697	1.783	0.028	0.589
399	ID38444897	38444897	70	8.966	97.217	38.087	0	2882.256	6	0.500	1	-10921639	383.247	372	296	517	37175	37.012	1.798	0.027	0.546
400	ID38421295	38421295	70	6.143	97.344	38.404	0	3362.632	7	0.500	1	-10921639	366.320	362	288	455	35533	28.121	0.715	0.027	0.674
401	ID38507936	38507936	70	3.911	96.964	38.440	0	3843.008	8	0.500	1	-10921639	343.196	342	279	391	33290	21.801	1.775	0.012	0.386
402	ID38503670	38503670	70	3.899	96.269	35.706	0	4323.384	9	0.500	1	-10921639	341.557	342	281	392	33131	21.196	1.900	0.012	0.372
403	ID38640821	38640821	71	4.101	30.646	112.139	0	480.376	1	0.500	1	-10921639	454.794	455	383	507	44115	23.558	1.380	0.010	0.395
404	ID38664761	38664761	71	4.984	33.372	111.001	0	960.752	2	0.500	1	-10921639	426.082	424	346	496	41330	26.055	1.802	0.012	0.372
405	ID38502735	38502735	71	3.684	33.790	110.809	0	1441.128	3	0.500	1	-10921639	415.773	415	318	473	40330	24.936	1.900	0.009	0.289
406	ID38654030	38654030	71	4.575	34.088	111.025	0	1921.504	4	0.500	1	-10921639	411.856	411	350	500	39950	22.706	1.787	0.009	0.333
407	ID38363803	38363803	71	4.413	31.565	111.358	0	2401.880	5	0.500	1	-10921639	410.546	409	352	489	39823	23.907	1.785	0.009	0.319
408	ID38492427	38492427	71	4.048	32.919	112.084	0	2882.256	6	0.500	1	-10921639	394.000	394	305	457	38218	28.114	0.705	0.012	0.321
409	ID38436669	38436669	71	9.057	33.797	111.477	0	3362.632	7	0.500	1	-10921639	405.907	404	310	518	39373	38.883	1.811	0.030	0.616
410	ID38566116	38566116	71	6.999	34.417	111.022	0	3843.008	8	0.500	1	-10921639	383.072	379	288	482	37158	28.652	1.613	0.017	0.451
411	ID38548797	38548797	71	7.075	34.604	111.166	0	4323.384	9	0.500	1	-10921639	367.165	366	288	474	35615	29.326	1.782	0.020	0.502
412	ID38402561	38402561	72	6.391	107.608	140.516	0	0.000	0	0.500	1	-10921639	471.691	470	358	550	45754	31.336	1.668	0.012	0.366
413	ID38656693	38656693	72	10.595	107.876	141.256	0	480.376	1	0.500	1	-10921639	456.814	447	382	595	44311	39.756	0.486	0.023	0.507
414	ID38677422	38677422	72	12.476	108.015	139.764	0	960.752	2	0.500	1	-10921639	444.237	435	364	604	43091	47.779	0.485	0.033	0.602
415	ID38519989	38519989	72	8.920	108.547	141.217	0	1441.128	3	0.500	1	-10921639	422.361	413	322	540	40969	39.082	0.480	0.020	0.422
416	ID38407232	38407232	73	7.802	60.834	169.148	0	0.000	0	0.500	1	-10921639	452.196	449	404	553	43863	27.928	0.476	0.018	0.585
417	ID38667700	38667700	73	7.487	61.303	169.154	0	480.376	1	0.500	1	-10921639	421.299	419	370	515	40866	28.074	0.482	0.019	0.569
418	ID38692306	38692306	73	5.845	61.987	169.343	0	960.752	2	0.500	1	-10921639	411.959	411	346	488	39960	25.163	1.807	0.017	0.555
419	ID38539779	38539779	73	3.966	62.462	168.647	0	1441.128	3	0.500	1	-10921639	408.567	408	345	476	39631	22.680	1.763	0.008	0.288
420	ID38679502	38679502	73	4.725	62.707	168.825	0	1921.504	4	0.500	1	-10921639	401.433	399	349	455	38939	21.807	1.773	0.016	0.577
421	ID38380575	38380575	73	4.201	63.042	168.701	0	2401.880	5	0.500	1	-10921639	390.711	391	307	453	37899	21.611	1.778	0.010	0.354
422	ID38405797	38405797	74	3.678	104.041	163.339	0	0.000	0	0.500	1	-10921639	454.113	453	381	524	44049	24.903	1.900	0.005	0.167
423	ID38666549	38666549	74	4.599	106.492	163.598	0	480.376	1	0.500	1	-10921639	438.773	435	359	525	42561	27.755	1.773	0.007	0.207
424	ID38693261	38693261	74	4.164	107.650	163.285	0	960.752	2	0.500	1	-10921639	414.309	413	348	481	40188	25.192	1.596	0.012	0.404
425	ID38693195	38693195	74	3.993	106.290	163.184	0	960.752	2	0.500	1	-10921639	415.856	416	356	490	40338	25.576	1.900	0.014	0.458
426	ID38535041	38535041	74	10.170	108.108	163.106	0	1441.128	3	0.500	1	-10921639	414.134	406	323	544	40171	42.607	0.478	0.032	0.608
427	ID38535037	38535037	74	7.563	104.225	163.170	0	1441.128	3	0.500	1	-10921639	413.649	413	319	529	40124	33.096	0.488	0.021	0.514
428	ID38681416	38681416	74	7.362	103.161	163.040	0	1921.504	4	0.500	1	-10921639	401.268	398	338	521	38923	32.913	1.789	0.018	0.431
429	ID38681744	38681744	74	12.366	108.887	163.687	0	1921.504	4	0.500	1	-10921639	411.062	401	333	598	39873	48.726	0.488	0.032	0.519
430	ID38379170	38379170	74	6.589	104.088	163.176	0	2401.880	5	0.500	1	-10921639	402.856	398	335	501	39077	30.717	1.900	0.017	0.436
431	ID38379173	38379173	74	9.598	107.760	163.143	0	2401.880	5	0.500	1	-10921639	399.546	388	330	561	38756	41.478	0.459	0.020	0.385
432	ID38519172	38519172	74	4.015	106.801	163.499	0	2882.256	6	0.500	1	-10921639	387.206	387	320	474	37559	22.750	0.714	0.011	0.383
433	ID38518935	38518935	74	5.279	104.132	163.131	0	2882.256	6	0.500	1	-10921639	390.423	386	309	484	37871	26.172	1.774	0.012	0.350
434	ID38456270	38456270	74	3.764	104.197	163.341	0	3362.632	7	0.500	1	-10921639	376.082	375	321	433	36480	22.540	1.900	0.008	0.275
435	ID38414222	38414222	75	16.756	171.452	200.804	0	0.000	0	0.500	1	-10921639	419.402	399	329	627	40682	58.300	0.486	0.053	0.730
436	ID38686133	38686133	75	16.655	172.185	200.650	0	480.376	1	0.500	1	-10921639	410.299	395	310	578	39799	59.260	0.487	0.052	0.686
437	ID38704257	38704257	75	12.491	172.205	200.465	0	960.752	2	0.500	1	-10921639	393.557	379	300	529	38175	47.736	0.477	0.035	0.559
438	ID38552157	38552157	75	12.231	172.212	200.317	0	1441.128	3	0.500	1	-10921639	386.320	375	321	513	37473	44.442	0.705	0.044	0.736
439	ID38695571	38695571	75	10.754	172.277	200.361	0	1921.504	4	0.500	1	-10921639	382.485	369	305	492	37101	39.009	0.480	0.031	0.585
440	ID38388479	38388479	75	9.067	172.202	200.489	0	2401.880	5	0.500	1	-10921639	369.670	367	284	473	35858	37.563	0.488	0.039	0.742
441	ID38555975	38555975	75	11.741	172.148	200.701	0	2882.256	6	0.500	1	-10921639	370.474	360	298	525	35936	45.016	1.793	0.040	0.633
442	ID38477713	38477713	75	11.362	172.185	200.627	0	3362.632	7	0.500	1	-10921639	359.784	352	290	501	34899	43.413	0.486	0.044	0.698
443	ID38601014	38601014	75	7.323	172.088	200.911	0	3843.008	8	0.500	1	-10921639	345.320	340	298	426	33496	25.191	0.485	0.021	0.570
444	ID38583978	38583978	75	6.673	171.884	200.811	0	4323.384	9	0.500	1	-10921639	330.742	328	276	422	32082	27.494	1.609	0.023	0.535
445	ID38642611	38642611	76	25.716	26.848	118.889	0	480.376	1	0.500	1	-10921639	511.330	485	371	785	49599	95.770	0.726	0.071	0.705
446	ID38667073	38667073	76	23.439	26.910	118.600	0	960.752	2	0.500	1	-10921639	482.031	463	303	678	46757	85.772	0.484	0.055	0.582
447	ID38505454	38505454	76	19.792	26.991	118.352	0	1441.128	3	0.500	1	-10921639	470.608	461	363	642	45649	69.550	0.711	0.051	0.657
448	ID38655259	38655259	76	20.376	26.949	118.413	0	1921.504	4	0.500	1	-10921639	463.928	451	333	655	45001	69.914	0.712	0.064	0.794
449	ID38367362	38367362	76	18.552	26.674	118.599	0	2401.880	5	0.500	1	-10921639	443.247	424	295	657	42995	77.842	0.484	0.044	0.484
450	ID38489730	38489730	76	17.039	26.668	118.758	0	2882.256	6	0.500	1	-10921639	436.041	424	299	584	42296	63.551	0.707	0.044	0.580
451	ID38439176	38439176	76	17.715	26.535	118.724	0	3362.632	7	0.500	1	-10921639	423.309	401	248	635	41061	72.515	0.710	0.051	0.562
452	ID38569007	38569007	76	14.643	26.461	118.919	0	3843.008	8	0.500	1	-10921639	407.402	391	274	584	39518	61.925	0.483	0.037	0.470
453	ID38549464	38549464	76	15.624	26.493	118.929	0	4323.384	9	0.500	1	-10921639	407.546	401	263	582	39532	58.701	0.715	0.056	0.737
454	ID38402120	38402120	77	7.921	45.976	142.268	0	0.000	0	0.500	1	-10921639	458.268	456	390	553	44452	33.094	0.484	0.022	0.594
455	ID38653554	38653554	77	7.421	45.766	142.137	0	480.376	1	0.500	1	-10921639	427.794	423	334	527	41496	32.968	0.477	0.019	0.475
456	ID38418638	38418638	78	6.361	44.920	220.435	0	0.000	0	0.500	1	-10921639	405.000	404	326	473	39285	27.391	1.900	0.022	0.631
457	ID38694329	38694329	78	3.822	46.329	220.097	0	480.376	1	0.500	1	-10921639	377.969	377	317	440	36663	22.780	0.714	0.007	0.243
458	ID38409551	38409551	79	4.526	200.835	189.517	0	0.000	0	0.500	1	-10921639	402.258	401	344	449	39019	21.889	1.397	0.012	0.451
459	ID38679081	38679081	79	5.666	202.404	189.557	0	480.376	1	0.500	1	-10921639	384.041	380	344	452	37252	22.908	0.489	0.019	0.632
460	ID38546769	38546769	79	3.725	202.757	190.719	0	1441.128	3	0.500	1	-10921639	363.371	362	291	422	35247	20.097	1.900	0.008	0.273
461	ID38690788	38690788	79	4.297	205.817	188.664	0	1921.504	4	0.500	1	-10921639	390.402	392	292	442	37869	25.008	1.900	0.010	0.312
462	ID38385864	38385864	79	5.249	205.947	188.674	0	2401.880	5	0.500	1	-10921639	390.608	391	310	450	37889	26.289	0.713	0.020	0.587
463	ID38538983	38538983	79	4.186	205.670	188.782	0	2882.256	6	0.500	1	-10921639	369.835	368	305	466	35874	24.389	1.413	0.016	0.488
464	ID38468667	38468667	79	5.518	204.009	186.416	0	3362.632	7	0.500	1	-10921639	339.052	335	284	448	32888	26.798	0.313	0.019	0.478
465	ID38594894	38594894	79	3.855	203.981	187.123	0	3843.008	8	0.500	1	-10921639	322.825	322	238	398	31314	24.058	1.664	0.014	0.371
466	ID38578336	38578336	79	4.800	203.522	186.756	0	4323.384	9	0.500	1	-10921639	315.567	312	239	409	30610	25.570	1.606	0.010	0.237
467	ID38399939	38399939	80	4.006	72.886	125.689	0	0.000	0	0.500	1	-10921639	450.381	449	400	515	43687	23.221	0.714	0.003	0.109
468	ID38644547	38644547	80	3.770	74.405	123.155	0	480.376	1	0.500	1	-10921639	407.289	407	284	456	39507	25.065	1.391	0.017	0.547
469	ID38378841	38378841	81	4.118	77.994	67.557	0	0.000	0	0.500	1	-10921639	463.784	461	400	511	44987	26.971	1.900	0.007	0.250
470	ID38620145	38620145	81	3.663	78.522	67.747	0	480.376	1	0.500	1	-10921639	437.649	436	369	498	42452	21.787	0.495	0.011	0.449
471	ID38394835	38394835	82	5.570	88.479	99.327	0	0.000	0	0.500	1	-10921639	457.392	453	376	530	44367	32.107	0.711	0.012	0.347
472	ID38636532	38636532	82	4.819	89.048	99.407	0	480.376	1	0.500	1	-10921639	417.887	420	321	507	40535	26.915	1.900	0.012	0.383
473	ID38414934	38414934	83	5.096	58.473	203.257	0	0.000	0	0.500	1	-10921639	426.577	425	367	505	41378	24.622	1.900	0.013	0.438
474	ID38685771	38685771	83	4.962	58.738	203.135	0	480.376	1	0.500	1	-10921639	385.258	384	322	444	37370	22.558	1.900	0.018	0.602
475	ID38553128	38553128	83	4.876	58.986	202.108	0	1441.128	3	0.500	1	-10921639	381.268	382	312	454	36983	23.248	0.489	0.022	0.720
476	ID38697285	38697285	83	4.402	58.765	202.521	0	1921.504	4	0.500	1	-10921639	368.814	369	285	432	35775	23.115	1.900	0.010	0.306
477	ID38389809	38389809	83	4.589	60.136	202.455	0	2401.880	5	0.500	1	-10921639	359.381	356	318	415	34860	22.088	1.828	0.012	0.379
478	ID38382565	38382565	84	6.420	78.340	69.089	0	0.000	0	0.500	1	-10921639	494.031	496	415	574	47921	31.701	1.900	0.015	0.472
479	ID38622319	38622319	84	4.461	78.380	69.348	0	480.376	1	0.500	1	-10921639	444.041	446	371	504	43072	23.219	1.795	0.007	0.276
480	ID38381832	38381832	85	4.800	186.964	64.328	0	0.000	0	0.500	1	-10921639	413.309	416	357	488	40091	24.622	1.596	0.015	0.491
481	ID38617480	38617480	85	3.774	188.085	64.368	0	480.376	1	0.500	1	-10921639	388.289	388	328	442	37664	19.117	1.600	0.006	0.250
482	ID38399758	38399758	86	8.318	42.942	124.716	0	0.000	0	0.500	1	-10921639	510.649	511	438	580	49533	32.021	1.790	0.014	0.437
483	ID38646667	38646667	86	4.719	43.849	124.569	0	480.376	1	0.500	1	-10921639	452.649	455	341	508	43907	24.904	1.603	0.009	0.327
484	ID38364802	38364802	87	4.911	105.492	25.516	0	0.000	0	0.500	1	-10921639	427.155	426	359	503	41434	23.839	0.491	0.014	0.483
485	ID38596773	38596773	87	3.939	104.919	25.709	0	480.376	1	0.500	1	-10921639	398.567	394	355	453	38661	21.834	1.570	0.005	0.170
486	ID38414721	38414721	88	3.747	175.931	202.512	0	0.000	0	0.500	1	-10921639	431.258	429	376	484	41832	24.681	1.816	0.006	0.197
487	ID38685483	38685483	88	3.716	177.179	202.457	0	480.376	1	0.500	1	-10921639	410.268	409	351	458	39796	21.721	1.649	0.010	0.364
488	ID38401951	38401951	89	3.846	129.520	144.485	0	0.000	0	0.500	1	-10921639	429.845	428	384	478	41695	22.314	1.821	0.010	0.400
489	ID38651900	38651900	89	4.002	128.647	143.564	0	480.376	1	0.500	1	-10921639	423.515	423	379	483	41081	23.163	1.629	0.011	0.411
490	ID38418205	38418205	90	4.139	121.941	219.102	0	0.000	0	0.500	1	-10921639	411.052	412	362	467	39872	22.871	1.900	0.010	0.355
491	ID38693710	38693710	90	4.271	121.402	218.774	0	480.376	1	0.500	1	-10921639	396.082	392	351	476	38420	23.860	0.398	0.012	0.402
492	ID38562864	38562864	90	3.835	124.667	218.244	0	1441.128	3	0.500	1	-10921639	363.351	358	323	442	35245	22.945	1.806	0.010	0.320
493	ID38701208	38701208	90	4.148	126.172	218.927	0	1921.504	4	0.500	1	-10921639	350.258	349	303	438	33975	21.472	0.323	0.017	0.551
494	ID38393738	38393738	90	6.272	126.360	217.926	0	2401.880	5	0.500	1	-10921639	351.485	346	301	477	34094	28.531	0.480	0.014	0.347
495	ID38565564	38565564	90	5.050	125.054	218.261	0	2882.256	6	0.500	1	-10921639	346.990	341	311	434	33658	24.563	0.480	0.012	0.344
496	ID38486004	38486004	90	4.188	125.502	217.518	0	3362.632	7	0.500	1	-10921639	331.969	331	239	418	32201	25.603	1.900	0.014	0.346
497	ID38408464	38408464	91	10.076	143.590	175.063	0	0.000	0	0.500	1	-10921639	448.052	436	356	604	43461	39.084	1.402	0.017	0.393
498	ID38673042	38673042	91	7.526	144.587	175.134	0	480.376	1	0.500	1	-10921639	414.990	411	347	520	40254	32.807	0.485	0.013	0.336
499	ID38402199	38402199	92	7.175	124.148	142.699	0	0.000	0	0.500	1	-10921639	416.598	411	319	515	40410	33.347	1.615	0.024	0.590
500	ID38653571	38653571	92	9.441	125.810	142.144	0	480.376	1	0.500	1	-10921639	450.907	454	345	536	43738	41.536	0.493	0.028	0.594
501	ID38408213	38408213	93	4.783	99.649	181.458	0	0.000	0	0.500	1	-10921639	477.577	478	413	551	46325	23.962	1.803	0.004	0.170
502	ID38672424	38672424	93	3.751	100.464	181.909	0	480.376	1	0.500	1	-10921639	446.072	445	362	516	43269	25.678	0.810	0.012	0.416
503	ID38541581	38541581	93	4.304	100.777	181.243	0	1441.128	3	0.500	1	-10921639	413.670	412	344	472	40126	25.664	1.900	0.012	0.394
504	ID38687935	38687935	93	4.632	100.637	182.497	0	1921.504	4	0.500	1	-10921639	401.186	400	339	466	38915	23.927	0.491	0.013	0.429
505	ID38385660	38385660	93	7.077	100.288	181.595	0	2401.880	5	0.500	1	-10921639	405.680	404	298	525	39351	35.189	0.467	0.018	0.405
506	ID38536504	38536504	93	10.484	100.448	182.558	0	2882.256	6	0.500	1	-10921639	402.113	392	341	527	39005	38.000	0.478	0.030	0.624
507	ID38467321	38467321	93	5.337	99.541	182.227	0	3362.632	7	0.500	1	-10921639	380.567	383	301	457	36915	24.518	1.900	0.021	0.644
508	ID38402988	38402988	94	3.771	114.438	146.407	0	0.000	0	0.500	1	-10921639	458.433	458	373	542	44468	28.521	1.805	0.014	0.428
509	ID38660689	38660689	94	4.489	113.890	145.053	0	480.376	1	0.500	1	-10921639	412.247	411	324	485	39988	26.669	1.787	0.013	0.387
510	ID38395045	38395045	95	5.435	145.397	100.441	0	0.000	0	0.500	1	-10921639	436.247	437	366	543	42316	29.601	0.702	0.016	0.452
511	ID38637550	38637550	95	3.959	145.386	100.688	0	480.376	1	0.500	1	-10921639	418.546	418	357	473	40599	22.938	1.769	0.007	0.245
512	ID38391974	38391974	96	5.865	26.429	87.481	0	0.000	0	0.500	1	-10921639	425.464	424	352	534	41270	28.998	0.479	0.008	0.239
513	ID38627606	38627606	96	3.855	27.124	87.087	0	480.376	1	0.500	1	-10921639	392.206	392	333	490	38044	26.302	1.813	0.016	0.465
514	ID38485457	38485457	96	4.342	27.805	86.474	0	1441.128	3	0.500	1	-10921639	385.897	389	318	450	37432	22.555	0.705	0.015	0.520
515	ID38640159	38640159	96	3.633	28.232	86.880	0	1921.504	4	0.500	1	-10921639	384.412	384	334	438	37288	21.997	1.900	0.015	0.504
516	ID38357907	38357907	96	3.846	28.420	86.969	0	2401.880	5	0.500	1	-10921639	380.856	380	310	452	36943	21.230	1.588	0.009	0.304
517	ID38371001	38371001	97	6.925	214.823	40.965	0	0.000	0	0.500	1	-10921639	471.392	470	353	553	45725	33.581	1.602	0.018	0.507
518	ID38609465	38609465	97	5.051	217.989	39.486	0	480.376	1	0.500	1	-10921639	373.505	372	318	441	36230	25.208	0.469	0.015	0.437
519	ID38355388	38355388	98	6.278	161.595	0.894	0	0.000	0	0.500	1	-10921639	430.268	429	385	495	41736	24.836	0.487	0.017	0.583
520	ID38586957	38586957	98	4.861	162.811	0.751	0	480.376	1	0.500	1	-10921639	397.165	395	281	460	38525	23.202	1.900	0.012	0.421
521	ID38415282	38415282	99	6.323	187.555	206.000	0	0.000	0	0.500	1	-10921639	455.216	458	370	504	44156	24.055	1.651	0.011	0.429
522	ID38689200	38689200	99	5.375	188.322	205.325	0	480.376	1	0.500	1	-10921639	413.536	413	333	507	40113	26.518	1.900	0.014	0.443
523	ID38372656	38372656	100	3.692	18.634	43.437	0	0.000	0	0.500	1	-10921639	358.938	359	256	429	34817	24.873	1.666	0.015	0.417
524	ID38604342	38604342	100	5.089	19.462	43.158	0	480.376	1	0.500	1	-10921639	355.742	349	293	441	34507	26.245	1.900	0.018	0.481
525	ID38416181	38416181	101	8.384	117.094	212.437	0	0.000	0	0.500	1	-10921639	425.577	418	320	547	41281	38.778	0.486	0.020	0.435
526	ID38690520	38690520	101	4.949	118.319	212.488	0	480.376	1	0.500	1	-10921639	397.804	398	325	467	38587	24.682	1.393	0.013	0.412
527	ID38698931	38698931	102	3.770	204.097	213.757	0	1921.504	4	0.500	1	-10921639	377.392	376	324	457	36607	21.093	1.197	0.002	0.085
528	ID38391880	38391880	102	9.621	205.391	215.353	0	2401.880	5	0.500	1	-10921639	393.402	385	300	518	38160	38.975	0.488	0.028	0.555
529	ID38562737	38562737	102	9.106	204.917	216.631	0	2882.256	6	0.500	1	-10921639	377.247	366	315	503	36593	41.601	1.900	0.025	0.447
530	ID38486640	38486640	102	11.269	205.652	215.103	0	3362.632	7	0.500	1	-10921639	377.041	365	316	564	36573	45.490	0.484	0.037	0.596
531	ID38604797	38604797	102	9.824	204.447	215.039	0	3843.008	8	0.500	1	-10921639	364.113	353	272	494	35319	37.560	0.488	0.037	0.699
532	ID38587632	38587632	102	4.661	204.486	214.987	0	4323.384	9	0.500	1	-10921639	327.763	323	277	417	31793	26.347	1.788	0.017	0.423
533	ID38557488	38557488	103	5.653	185.707	210.019	0	1441.128	3	0.500	1	-10921639	407.103	401	339	491	39489	24.800	1.718	0.016	0.515
534	ID38698743	38698743	103	7.773	184.812	209.987	0	1921.504	4	0.500	1	-10921639	402.505	397	336	494	39043	33.493	0.705	0.021	0.498
535	ID38392904	38392904	103	7.427	184.487	209.848	0	2401.880	5	0.500	1	-10921639	397.082	390	341	502	38517	32.230	1.900	0.014	0.336
536	ID38557971	38557971	103	8.859	184.986	209.902	0	2882.256	6	0.500	1	-10921639	397.536	391	342	501	38561	34.732	0.479	0.029	0.641
537	ID38488784	38488784	103	6.933	185.486	209.895	0	3362.632	7	0.500	1	-10921639	385.619	381	343	476	37405	27.773	1.900	0.017	0.472
538	ID38697093	38697093	104	4.592	187.959	205.011	0	1921.504	4	0.500	1	-10921639	410.722	410	349	473	39840	24.578	1.900	0.011	0.356
539	ID38394824	38394824	104	4.411	188.350	205.289	0	2401.880	5	0.500	1	-10921639	392.876	396	329	455	38109	25.352	1.900	0.009	0.290
540	ID38559066	38559066	104	4.231	187.487	205.060	0	2882.256	6	0.500	1	-10921639	391.186	389	332	455	37945	20.335	1.706	0.013	0.480
541	ID38557793	38557793	105	4.591	113.337	210.624	0	1441.128	3	0.500	1	-10921639	411.660	411	297	472	39931	24.750	1.900	0.009	0.312
542	ID38700585	38700585	105	4.815	113.279	210.743	0	1921.504	4	0.500	1	-10921639	406.371	405	311	474	39418	27.537	1.806	0.018	0.522
543	ID38393154	38393154	105	3.961	113.719	210.771	0	2401.880	5	0.500	1	-10921639	385.505	387	331	427	37394	21.879	1.394	0.005	0.188
544	ID38558805	38558805	105	7.979	111.880	211.122	0	2882.256	6	0.500	1	-10921639	386.979	381	334	477	37537	29.996	1.900	0.026	0.662
545	ID38489566	38489566	105	6.628	112.083	210.815	0	3362.632	7	0.500	1	-10921639	369.948	367	325	445	35885	24.457	0.706	0.022	0.659
546	ID38608042	38608042	105	8.547	110.823	210.754	0	3843.008	8	0.500	1	-10921639	350.670	341	266	439	34015	33.671	0.481	0.029	0.578
547	ID38589136	38589136	105	9.153	111.039	210.571	0	4323.384	9	0.500	1	-10921639	341.557	331	277	480	33131	35.085	0.481	0.027	0.503
548	ID38649476	38649476	106	6.975	90.317	71.850	0	960.752	2	0.500	1	-10921639	415.165	411	340	527	40271	30.101	1.804	0.021	0.561
549	ID38478170	38478170	106	9.487	91.321	71.846	0	1441.128	3	0.500	1	-10921639	424.784	414	367	570	41204	38.945	0.480	0.022	0.479
550	ID38630756	38630756	106	7.799	90.948	72.136	0	1921.504	4	0.500	1	-10921639	403.876	397	311	529	39176	34.703	0.475	0.024	0.536
551	ID38354374	38354374	106	6.051	90.275	72.022	0	2401.880	5	0.500	1	-10921639	389.825	384	335	491	37813	28.561	1.775	0.017	0.453
552	ID38464447	38464447	106	6.645	90.270	72.396	0	2882.256	6	0.500	1	-10921639	385.887	381	322	509	37431	28.451	1.900	0.021	0.546
553	ID38701071	38701071	107	4.930	121.089	218.473	0	1921.504	4	0.500	1	-10921639	364.959	364	313	464	35401	26.270	1.811	0.018	0.485
554	ID38394088	38394088	107	5.851	120.085	219.378	0	2401.880	5	0.500	1	-10921639	356.206	350	305	452	34552	27.174	0.485	0.015	0.391
555	ID38565609	38565609	107	4.585	121.790	218.425	0	2882.256	6	0.500	1	-10921639	350.443	346	305	419	33993	23.599	1.787	0.013	0.368
556	ID38694540	38694540	108	7.562	68.346	189.887	0	1921.504	4	0.500	1	-10921639	380.969	374	329	501	36954	32.667	0.478	0.022	0.507
557	ID38386149	38386149	108	9.822	69.014	189.958	0	2401.880	5	0.500	1	-10921639	396.258	383	340	535	38437	37.973	0.480	0.026	0.537
558	ID38538931	38538931	108	9.085	70.475	188.811	0	2882.256	6	0.500	1	-10921639	379.021	368	329	483	36765	35.041	0.482	0.028	0.580
559	ID38372452	38372452	109	7.213	103.420	139.056	0	2401.880	5	0.500	1	-10921639	409.825	408	326	528	39753	34.701	1.770	0.024	0.546
560	ID38504311	38504311	109	10.642	102.692	137.425	0	2882.256	6	0.500	1	-10921639	399.732	390	334	551	38774	42.335	0.479	0.040	0.727
561	ID38445141	38445141	109	10.919	102.004	139.070	0	3362.632	7	0.500	1	-10921639	395.969	382	339	571	38409	45.881	0.476	0.029	0.481
562	ID38348794	38348794	110	4.145	70.132	39.206	0	2401.880	5	0.500	1	-10921639	384.103	384	325	448	37258	20.601	1.584	0.011	0.395
563	ID38440917	38440917	110	3.893	70.182	39.523	0	2882.256	6	0.500	1	-10921639	377.186	378	341	418	36587	17.363	0.496	0.013	0.562
564	ID38610232	38610232	111	4.102	36.202	1.409	0	960.752	2	0.500	1	-10921639	381.887	384	308	433	37043	19.302	1.430	0.013	0.490
565	ID38446382	38446382	111	4.273	36.444	1.252	0	1441.128	3	0.500	1	-10921639	382.557	382	303	439	37108	22.298	1.605	0.015	0.491
566	ID38597334	38597334	111	4.193	36.606	1.120	0	1921.504	4	0.500	1	-10921639	377.361	374	322	460	36604	22.787	1.795	0.009	0.298
567	ID38343038	38343038	111	5.509	36.183	1.120	0	2401.880	5	0.500	1	-10921639	379.206	377	317	478	36783	24.365	0.476	0.017	0.510
568	ID38430066	38430066	111	3.872	36.141	1.314	0	2882.256	6	0.500	1	-10921639	361.309	362	273	413	35047	21.133	1.593	0.014	0.468
569	ID38676454	38676454	112	3.746	119.758	132.468	0	960.752	2	0.500	1	-10921639	408.948	412	323	466	39668	23.609	0.718	0.012	0.424
570	ID38515688	38515688	112	4.855	119.955	132.358	0	1441.128	3	0.500	1	-10921639	409.629	410	323	477	39734	26.454	1.606	0.013	0.402
571	ID38665687	38665687	112	4.107	119.896	132.527	0	1921.504	4	0.500	1	-10921639	398.186	400	334	468	38624	29.378	1.838	0.013	0.343
572	ID38370800	38370800	112	6.596	120.030	132.542	0	2401.880	5	0.500	1	-10921639	396.464	393	342	466	38457	28.928	0.485	0.021	0.562
573	ID38500977	38500977	112	7.465	120.733	132.956	0	2882.256	6	0.500	1	-10921639	387.876	384	316	478	37624	30.258	1.626	0.019	0.470
574	ID38443153	38443153	112	12.068	120.707	132.298	0	3362.632	7	0.500	1	-10921639	395.196	384	297	517	38334	44.749	0.485	0.031	0.530
575	ID38575349	38575349	112	8.866	120.948	133.256	0	3843.008	8	0.500	1	-10921639	368.010	359	276	517	35697	36.253	0.487	0.026	0.522
576	ID38559748	38559748	112	5.822	120.456	133.589	0	4323.384	9	0.500	1	-10921639	341.876	337	288	425	33162	26.003	0.482	0.024	0.617
577	ID38611047	38611047	113	4.675	36.449	23.060	0	1921.504	4	0.500	1	-10921639	376.361	372	337	445	36507	21.850	1.781	0.013	0.432
578	ID38346227	38346227	113	4.967	36.082	22.116	0	2401.880	5	0.500	1	-10921639	377.289	376	329	447	36597	23.965	0.475	0.017	0.537
579	ID38436118	38436118	113	4.721	35.539	21.775	0	2882.256	6	0.500	1	-10921639	367.155	364	322	426	35614	22.910	0.494	0.018	0.580
580	ID38607895	38607895	114	3.772	5.647	18.195	0	1921.504	4	0.500	1	-10921639	375.062	374	310	448	36381	22.441	1.900	0.005	0.159
581	ID38346504	38346504	114	6.044	5.706	18.756	0	2401.880	5	0.500	1	-10921639	376.485	375	293	463	36519	28.121	1.615	0.023	0.607
582	ID38434667	38434667	114	5.790	5.647	19.024	0	2882.256	6	0.500	1	-10921639	369.835	369	320	438	35874	24.327	1.900	0.019	0.560
583	ID38490771	38490771	114	4.077	7.044	18.311	0	3843.008	8	0.500	1	-10921639	333.464	331	263	450	32346	23.074	1.602	0.002	0.070
584	ID38491648	38491648	114	5.466	7.676	17.943	0	4323.384	9	0.500	1	-10921639	314.959	309	261	408	30551	26.969	0.488	0.023	0.522
585	ID38384385	38384385	115	3.920	94.847	183.080	0	2401.880	5	0.500	1	-10921639	402.351	401	315	461	39028	23.752	1.400	0.006	0.204
586	ID38539329	38539329	115	3.852	94.928	183.181	0	2882.256	6	0.500	1	-10921639	389.505	388	311	450	37782	23.344	1.397	0.012	0.392
587	ID38465498	38465498	115	4.057	95.105	183.321	0	3362.632	7	0.500	1	-10921639	383.588	385	292	437	37208	21.590	1.804	0.019	0.666
588	ID38623861	38623861	116	4.521	133.908	25.420	0	960.752	2	0.500	1	-10921639	417.732	415	368	489	40520	21.583	1.900	0.010	0.368
589	ID38456001	38456001	116	8.503	134.299	25.496	0	1441.128	3	0.500	1	-10921639	414.536	407	348	526	40210	32.899	0.473	0.019	0.469
590	ID38609001	38609001	116	9.699	133.477	25.312	0	1921.504	4	0.500	1	-10921639	394.835	386	307	492	38299	37.565	0.485	0.033	0.665
591	ID38349573	38349573	116	9.676	134.559	24.920	0	2401.880	5	0.500	1	-10921639	392.041	384	289	511	38028	37.237	0.713	0.031	0.640
592	ID38438272	38438272	116	9.313	134.550	25.790	0	2882.256	6	0.500	1	-10921639	389.175	379	318	492	37750	35.126	0.476	0.031	0.659
593	ID38419923	38419923	116	5.354	134.728	25.622	0	3362.632	7	0.500	1	-10921639	366.670	366	314	437	35567	24.562	0.487	0.017	0.485
594	ID38500222	38500222	116	4.362	134.945	25.128	0	3843.008	8	0.500	1	-10921639	340.938	338	287	439	33071	22.744	1.597	0.015	0.439
595	ID38693539	38693539	117	5.879	42.341	154.218	0	960.752	2	0.500	1	-10921639	429.887	432	366	500	41699	27.554	1.604	0.009	0.276
596	ID38525684	38525684	117	5.426	42.108	153.282	0	1441.128	3	0.500	1	-10921639	431.722	431	384	514	41877	24.050	1.821	0.016	0.579
597	ID38674301	38674301	117	5.033	42.441	153.409	0	1921.504	4	0.500	1	-10921639	420.732	419	355	476	40811	24.475	1.900	0.013	0.425
598	ID38375581	38375581	117	4.488	42.729	154.151	0	2401.880	5	0.500	1	-10921639	399.567	401	342	468	38758	22.733	1.900	0.013	0.468
599	ID38521751	38521751	117	8.133	42.254	154.233	0	2882.256	6	0.500	1	-10921639	398.742	395	335	510	38678	32.271	0.477	0.027	0.653
600	ID38457981	38457981	117	7.623	41.184	153.028	0	3362.632	7	0.500	1	-10921639	390.010	383	334	513	37831	32.045	0.484	0.018	0.427
601	ID38582796	38582796	117	10.376	41.559	153.302	0	3843.008	8	0.500	1	-10921639	385.175	373	333	524	37362	37.956	0.480	0.033	0.640
602	ID38569708	38569708	117	7.749	40.824	153.870	0	4323.384	9	0.500	1	-10921639	361.835	356	316	450	35098	30.270	0.474	0.018	0.425
603	ID38692116	38692116	118	6.680	147.374	168.933	0	960.752	2	0.500	1	-10921639	402.247	399	358	469	39018	23.672	1.793	0.019	0.621
604	ID38540298	38540298	118	10.323	147.485	169.577	0	1441.128	3	0.500	1	-10921639	396.258	383	339	555	38437	41.788	1.900	0.029	0.529
605	ID38679614	38679614	118	7.721	146.731	168.986	0	1921.504	4	0.500	1	-10921639	384.773	379	308	490	37323	34.856	0.482	0.026	0.556
606	ID38380585	38380585	118	6.609	146.835	168.711	0	2401.880	5	0.500	1	-10921639	385.031	381	337	489	37348	29.671	1.717	0.023	0.594
607	ID38527850	38527850	118	6.089	145.180	169.124	0	2882.256	6	0.500	1	-10921639	375.113	371	299	451	36386	27.124	1.900	0.020	0.535
608	ID38460986	38460986	118	4.567	146.373	168.403	0	3362.632	7	0.500	1	-10921639	377.299	378	310	442	36598	23.110	0.707	0.010	0.336
609	ID38587545	38587545	118	7.785	146.371	168.806	0	3843.008	8	0.500	1	-10921639	369.825	362	301	521	35873	35.442	1.900	0.018	0.374
610	ID38390185	38390185	119	5.025	135.486	203.853	0	2401.880	5	0.500	1	-10921639	384.536	382	308	445	37300	24.889	1.900	0.017	0.515
611	ID38552686	38552686	119	4.234	134.976	202.608	0	2882.256	6	0.500	1	-10921639	365.454	364	294	458	35449	25.681	0.479	0.017	0.477
612	ID38479597	38479597	119	6.707	133.044	203.617	0	3362.632	7	0.500	1	-10921639	375.526	371	328	488	36426	29.054	1.817	0.021	0.538
613	ID38600486	38600486	119	6.297	133.079	202.777	0	3843.008	8	0.500	1	-10921639	348.536	341	286	464	33808	33.740	1.708	0.021	0.427
614	ID38584405	38584405	119	4.727	132.722	203.825	0	4323.384	9	0.500	1	-10921639	339.268	335	286	409	32909	24.497	1.900	0.015	0.415
615	ID38704056	38704056	120	5.216	148.557	207.135	0	960.752	2	0.500	1	-10921639	387.918	388	330	466	37628	25.068	1.609	0.014	0.436
616	ID38560526	38560526	120	4.157	148.595	207.635	0	1441.128	3	0.500	1	-10921639	375.000	371	325	437	36375	22.237	0.494	0.013	0.421
617	ID38700108	38700108	120	3.701	149.171	207.739	0	1921.504	4	0.500	1	-10921639	368.639	372	300	409	35758	22.489	0.717	0.009	0.302
618	ID38390696	38390696	120	4.000	148.427	207.611	0	2401.880	5	0.500	1	-10921639	361.969	360	305	434	35111	21.872	1.900	0.008	0.250
619	ID38554188	38554188	120	3.962	148.610	207.988	0	2882.256	6	0.500	1	-10921639	358.639	359	295	406	34788	20.580	1.793	0.014	0.468
620	ID38488564	38488564	120	4.141	148.998	208.023	0	3362.632	7	0.500	1	-10921639	348.052	345	311	425	33761	20.854	1.900	0.007	0.244
621	ID38694389	38694389	121	3.876	134.021	189.742	0	1921.504	4	0.500	1	-10921639	388.144	386	347	460	37650	22.947	1.773	0.012	0.417
622	ID38385967	38385967	121	8.267	134.100	189.314	0	2401.880	5	0.500	1	-10921639	392.134	388	309	509	38037	33.342	0.487	0.030	0.675
623	ID38541327	38541327	121	5.783	134.190	190.549	0	2882.256	6	0.500	1	-10921639	382.639	382	324	461	37116	25.671	1.383	0.018	0.517
624	ID38473609	38473609	121	6.357	133.768	189.856	0	3362.632	7	0.500	1	-10921639	369.165	363	328	509	35809	30.490	1.405	0.022	0.514
625	ID38596444	38596444	121	6.760	134.126	191.033	0	3843.008	8	0.500	1	-10921639	361.928	357	303	473	35107	31.179	1.792	0.021	0.468
626	ID38580384	38580384	121	5.417	135.195	190.785	0	4323.384	9	0.500	1	-10921639	346.845	343	284	422	33644	24.637	1.900	0.010	0.289
627	ID38361894	38361894	122	5.850	93.905	98.528	0	2401.880	5	0.500	1	-10921639	401.701	397	333	508	38965	32.433	1.900	0.019	0.453
628	ID38474049	38474049	122	7.282	94.522	98.447	0	2882.256	6	0.500	1	-10921639	382.165	375	274	522	37070	38.212	1.900	0.018	0.356
629	ID38432268	38432268	122	9.570	94.887	98.672	0	3362.632	7	0.500	1	-10921639	379.340	369	307	535	36796	43.111	0.482	0.026	0.440
630	ID38555852	38555852	123	4.048	5.838	205.625	0	1441.128	3	0.500	1	-10921639	379.577	380	285	442	36819	23.786	1.900	0.017	0.544
631	ID38697141	38697141	123	3.853	5.718	205.223	0	1921.504	4	0.500	1	-10921639	373.454	372	313	432	36225	21.944	0.490	0.003	0.117
632	ID38394801	38394801	123	5.646	5.703	205.242	0	2401.880	5	0.500	1	-10921639	372.948	372	285	456	36176	26.262	0.483	0.015	0.420
633	ID38559722	38559722	123	6.262	5.051	206.069	0	2882.256	6	0.500	1	-10921639	352.948	347	287	468	34236	31.251	0.481	0.029	0.645
634	ID38481333	38481333	123	5.374	5.394	206.057	0	3362.632	7	0.500	1	-10921639	351.928	346	313	445	34137	24.894	1.586	0.019	0.539
635	ID38601852	38601852	123	5.402	5.152	206.230	0	3843.008	8	0.500	1	-10921639	334.856	332	275	395	32481	24.645	1.900	0.022	0.580
636	ID38702286	38702286	124	4.487	44.448	190.956	0	960.752	2	0.500	1	-10921639	349.361	345	272	422	33888	27.683	0.489	0.016	0.395
637	ID38546791	38546791	124	3.773	44.503	190.814	0	1441.128	3	0.500	1	-10921639	346.856	345	297	443	33645	26.004	1.900	0.011	0.286
638	ID38694900	38694900	124	3.998	44.604	190.816	0	1921.504	4	0.500	1	-10921639	343.000	340	287	441	33271	23.867	1.900	0.019	0.546
639	ID38387615	38387615	124	3.680	44.613	190.935	0	2401.880	5	0.500	1	-10921639	338.196	336	260	407	32805	24.412	1.796	0.018	0.486
640	ID38645312	38645312	125	4.873	141.635	73.006	0	960.752	2	0.500	1	-10921639	424.505	425	372	486	41177	24.984	1.602	0.009	0.308
641	ID38476164	38476164	125	6.449	142.064	72.727	0	1441.128	3	0.500	1	-10921639	432.794	432	370	528	41981	28.505	1.849	0.015	0.455
642	ID38630878	38630878	125	4.354	141.632	72.757	0	1921.504	4	0.500	1	-10921639	413.134	414	341	476	40074	25.588	1.900	0.010	0.325
643	ID38610260	38610260	126	4.217	213.703	1.356	0	960.752	2	0.500	1	-10921639	351.351	350	314	405	34081	17.991	1.589	0.014	0.546
644	ID38446516	38446516	126	3.759	213.836	1.725	0	1441.128	3	0.500	1	-10921639	344.412	342	282	398	33408	22.157	0.493	0.014	0.434
645	ID38681191	38681191	127	3.896	106.307	145.833	0	960.752	2	0.500	1	-10921639	413.165	412	350	466	40077	21.053	1.752	0.008	0.305
646	ID38526472	38526472	127	7.212	103.890	146.666	0	1441.128	3	0.500	1	-10921639	408.485	405	331	513	39623	30.909	0.486	0.019	0.489
647	ID38669440	38669440	127	7.588	103.961	146.636	0	1921.504	4	0.500	1	-10921639	406.464	403	329	495	39427	32.930	0.486	0.015	0.364
648	ID38379827	38379827	127	6.776	104.172	146.987	0	2401.880	5	0.500	1	-10921639	391.309	388	270	476	37957	34.530	0.488	0.019	0.421
649	ID38661601	38661601	128	11.994	79.816	104.965	0	960.752	2	0.500	1	-10921639	435.557	423	311	602	42249	55.129	0.478	0.028	0.430
650	ID38497814	38497814	128	14.656	79.140	104.340	0	1441.128	3	0.500	1	-10921639	429.794	417	332	600	41690	51.679	0.482	0.039	0.617
651	ID38647685	38647685	128	14.564	80.451	105.018	0	1921.504	4	0.500	1	-10921639	423.969	408	338	679	41125	62.538	0.705	0.042	0.541
652	ID38362966	38362966	128	9.887	80.981	104.910	0	2401.880	5	0.500	1	-10921639	394.010	386	301	502	38219	41.127	0.484	0.039	0.727
653	ID38699632	38699632	129	3.709	58.194	192.235	0	960.752	2	0.500	1	-10921639	403.711	402	356	458	39160	21.090	0.697	0.012	0.471
654	ID38551160	38551160	129	8.343	57.942	193.860	0	1441.128	3	0.500	1	-10921639	412.784	407	333	525	40040	35.759	0.480	0.019	0.419
655	ID38693705	38693705	129	5.719	58.151	193.118	0	1921.504	4	0.500	1	-10921639	400.031	398	354	489	38803	24.725	1.900	0.019	0.614
656	ID38386932	38386932	129	6.374	58.765	193.070	0	2401.880	5	0.500	1	-10921639	398.629	395	337	488	38667	26.639	0.483	0.017	0.513
657	ID38662047	38662047	130	3.822	135.662	106.792	0	960.752	2	0.500	1	-10921639	437.887	439	364	505	42475	29.021	1.588	0.016	0.465
658	ID38503519	38503519	130	4.313	135.993	107.918	0	1441.128	3	0.500	1	-10921639	422.588	422	351	496	40991	26.226	1.900	0.009	0.293
659	ID38648195	38648195	130	3.938	135.920	107.254	0	1921.504	4	0.500	1	-10921639	423.309	423	358	476	41061	20.454	1.900	0.005	0.205
660	ID38363092	38363092	130	4.332	136.182	106.051	0	2401.880	5	0.500	1	-10921639	403.639	404	324	474	39153	24.099	1.770	0.016	0.523
661	ID38679193	38679193	131	4.841	100.358	124.360	0	960.752	2	0.500	1	-10921639	418.546	414	349	493	40599	26.047	0.705	0.014	0.454
662	ID38514207	38514207	131	3.902	100.052	124.179	0	1441.128	3	0.500	1	-10921639	408.856	408	370	466	39659	20.793	1.601	0.011	0.436
663	ID38658826	38658826	131	3.675	100.232	124.272	0	1921.504	4	0.500	1	-10921639	405.309	404	356	472	39315	23.190	1.604	0.007	0.260
664	ID38497314	38497314	131	5.040	99.190	124.744	0	2882.256	6	0.500	1	-10921639	373.639	368	313	443	36243	28.351	0.481	0.017	0.431
665	ID38441037	38441037	131	5.739	100.947	124.343	0	3362.632	7	0.500	1	-10921639	375.041	373	288	451	36379	25.700	1.787	0.014	0.392
666	ID38570123	38570123	131	4.894	101.338	124.405	0	3843.008	8	0.500	1	-10921639	353.052	355	277	437	34246	26.177	1.812	0.017	0.458
667	ID38554793	38554793	131	8.185	101.579	124.709	0	4323.384	9	0.500	1	-10921639	350.629	343	236	458	34011	38.347	0.479	0.041	0.717
668	ID38612267	38612267	132	5.062	0.306	5.135	0	960.752	2	0.500	1	-10921639	372.402	373	322	439	36123	25.039	1.900	0.013	0.381
669	ID38449645	38449645	132	4.433	0.774	5.269	0	1441.128	3	0.500	1	-10921639	359.206	360	271	426	34843	23.872	1.610	0.009	0.278
670	ID38598664	38598664	132	4.235	0.894	5.029	0	1921.504	4	0.500	1	-10921639	352.062	352	275	415	34150	23.361	1.585	0.018	0.541
671	ID38343781	38343781	132	4.519	0.000	5.525	0	2401.880	5	0.500	1	-10921639	334.175	352	136	439	32415	59.479	1.786	0.054	0.580
672	ID38412638	38412638	132	4.206	0.695	6.429	0	3362.632	7	0.500	1	-10921639	333.124	332	265	398	32313	23.719	1.816	0.021	0.582
673	ID38483910	38483910	132	4.368	0.314	6.537	0	3843.008	8	0.500	1	-10921639	327.907	322	285	412	31807	23.354	1.900	0.012	0.345
674	ID38489033	38489033	132	5.553	0.000	5.958	0	4323.384	9	0.500	1	-10921639	297.876	313	120	382	28894	55.004	1.792	0.065	0.665
675	ID38688808	38688808	133	3.764	145.502	164.949	0	960.752	2	0.500	1	-10921639	408.000	405	319	512	39576	25.442	1.804	0.006	0.191
676	ID38536355	38536355	133	6.874	145.355	163.822	0	1441.128	3	0.500	1	-10921639	396.402	392	322	505	38451	35.216	0.483	0.017	0.368
677	ID38677481	38677481	133	5.757	146.242	164.607	0	1921.504	4	0.500	1	-10921639	400.526	397	322	510	38851	29.964	1.817	0.008	0.224
678	ID38380121	38380121	133	6.825	146.634	165.223	0	2401.880	5	0.500	1	-10921639	392.103	388	335	490	38034	27.801	0.475	0.022	0.607
679	ID38705446	38705446	134	6.055	113.586	211.052	0	960.752	2	0.500	1	-10921639	425.979	424	305	482	41320	26.668	1.900	0.016	0.509
680	ID38557972	38557972	134	4.522	113.706	211.038	0	1441.128	3	0.500	1	-10921639	406.680	408	344	460	39448	24.457	1.663	0.013	0.421
681	ID38623648	38623648	135	5.290	136.069	25.695	0	960.752	2	0.500	1	-10921639	409.887	409	327	503	39759	28.074	1.900	0.012	0.355
682	ID38455946	38455946	135	4.371	137.522	25.220	0	1441.128	3	0.500	1	-10921639	380.629	380	298	442	36921	24.385	1.900	0.021	0.632
683	ID38651067	38651067	136	3.679	121.442	82.311	0	960.752	2	0.500	1	-10921639	410.186	408	325	495	39788	24.389	1.900	0.019	0.633
684	ID38488660	38488660	136	3.988	120.928	82.796	0	1441.128	3	0.500	1	-10921639	406.381	403	333	482	39419	24.107	1.795	0.010	0.346
685	ID38641705	38641705	136	3.813	122.510	83.277	0	1921.504	4	0.500	1	-10921639	395.082	394	312	454	38323	23.234	1.900	0.015	0.491
686	ID38422985	38422985	137	4.734	18.337	47.211	0	3362.632	7	0.500	1	-10921639	350.000	347	289	444	33950	25.817	1.696	0.016	0.425
687	ID38520851	38520851	137	7.000	18.745	46.772	0	3843.008	8	0.500	1	-10921639	337.093	330	266	446	32698	34.382	0.476	0.019	0.375
688	ID38509276	38509276	137	4.462	18.137	48.262	0	4323.384	9	0.500	1	-10921639	324.247	319	287	414	31452	23.637	0.476	0.015	0.412
689	ID38437297	38437297	138	4.121	159.227	15.535	0	2882.256	6	0.500	1	-10921639	386.093	381	309	464	37451	24.046	0.709	0.014	0.449
690	ID38415938	38415938	138	7.373	157.826	14.081	0	3362.632	7	0.500	1	-10921639	371.546	365	294	476	36040	31.222	0.480	0.024	0.547
691	ID38487057	38487057	138	9.611	156.108	13.145	0	3843.008	8	0.500	1	-10921639	355.742	345	297	506	34507	40.071	0.474	0.031	0.541
692	ID38487095	38487095	138	8.336	155.797	12.771	0	4323.384	9	0.500	1	-10921639	335.711	332	278	465	32564	34.132	0.481	0.036	0.693
693	ID38474800	38474800	139	4.577	24.645	89.052	0	2882.256	6	0.500	1	-10921639	362.608	360	304	435	35173	26.527	1.900	0.014	0.384
694	ID38432453	38432453	139	6.365	25.376	89.806	0	3362.632	7	0.500	1	-10921639	357.000	348	303	472	34629	30.975	0.707	0.021	0.484
695	ID38555258	38555258	139	3.838	24.714	89.478	0	3843.008	8	0.500	1	-10921639	343.825	342	292	405	33351	21.299	1.788	0.011	0.364
696	ID38518654	38518654	140	6.474	23.683	162.685	0	2882.256	6	0.500	1	-10921639	372.052	365	320	507	36089	31.425	0.475	0.023	0.540
697	ID38456794	38456794	140	8.836	24.135	161.393	0	3362.632	7	0.500	1	-10921639	376.835	369	320	505	36553	35.083	0.480	0.021	0.447
698	ID38585749	38585749	140	10.631	24.208	163.194	0	3843.008	8	0.500	1	-10921639	363.804	353	307	521	35289	41.743	0.486	0.034	0.580
699	ID38573772	38573772	140	11.609	23.715	161.855	0	4323.384	9	0.500	1	-10921639	359.423	347	289	492	34864	44.180	0.486	0.039	0.614
700	ID38424927	38424927	141	4.189	17.650	52.836	0	3362.632	7	0.500	1	-10921639	358.907	356	293	421	34814	26.390	1.795	0.012	0.317
701	ID38527082	38527082	141	4.088	20.080	51.835	0	3843.008	8	0.500	1	-10921639	331.814	328	271	434	32186	26.604	1.900	0.016	0.384
702	ID38511223	38511223	141	3.862	20.132	51.434	0	4323.384	9	0.500	1	-10921639	320.423	318	248	382	31081	19.157	0.483	0.011	0.356
703	ID38467749	38467749	142	5.820	23.166	85.094	0	2882.256	6	0.500	1	-10921639	355.680	348	303	468	34501	30.794	1.900	0.014	0.324
704	ID38429905	38429905	142	4.946	22.308	84.733	0	3362.632	7	0.500	1	-10921639	344.320	339	290	441	33399	24.750	0.324	0.009	0.257
705	ID38546067	38546067	142	4.429	23.513	85.308	0	3843.008	8	0.500	1	-10921639	335.845	333	282	398	32577	22.641	0.710	0.010	0.294
706	ID38564348	38564348	143	3.872	92.190	220.457	0	2882.256	6	0.500	1	-10921639	338.340	337	273	401	32819	22.009	1.607	0.010	0.304
707	ID38493335	38493335	143	4.098	93.117	220.224	0	3362.632	7	0.500	1	-10921639	336.629	335	281	404	32653	22.029	0.486	0.008	0.256
708	ID38609276	38609276	143	3.770	93.088	219.456	0	3843.008	8	0.500	1	-10921639	323.753	322	265	392	31404	23.236	0.479	0.012	0.334
709	ID38441751	38441751	144	4.569	71.539	127.945	0	3362.632	7	0.500	1	-10921639	381.804	380	322	437	37035	21.456	1.900	0.012	0.410
710	ID38574154	38574154	144	5.099	71.372	128.645	0	3843.008	8	0.500	1	-10921639	364.536	363	321	458	35360	24.088	0.482	0.012	0.363
711	ID38558126	38558126	144	6.572	71.193	128.360	0	4323.384	9	0.500	1	-10921639	351.969	342	292	456	34141	30.305	1.900	0.024	0.535
712	ID38437299	38437299	145	3.823	160.510	15.476	0	2882.256	6	0.500	1	-10921639	387.340	385	325	449	37572	24.347	0.488	0.014	0.428
713	ID38418836	38418836	145	6.467	161.144	16.378	0	3362.632	7	0.500	1	-10921639	377.784	371	310	476	36645	30.764	1.581	0.019	0.458
714	ID38499148	38499148	145	7.333	160.307	16.337	0	3843.008	8	0.500	1	-10921639	371.113	365	280	480	35998	33.567	1.900	0.028	0.610
715	ID38501978	38501978	145	8.947	161.709	16.017	0	4323.384	9	0.500	1	-10921639	346.722	339	233	488	33632	37.758	1.598	0.034	0.610
716	ID38445800	38445800	146	3.718	211.105	137.498	0	3362.632	7	0.500	1	-10921639	351.505	349	297	411	34096	20.642	1.900	0.003	0.095
717	ID38579821	38579821	146	8.171	211.832	137.228	0	3843.008	8	0.500	1	-10921639	344.402	342	295	471	33407	31.452	0.483	0.027	0.568
718	ID38562478	38562478	146	5.087	211.589	136.578	0	4323.384	9	0.500	1	-10921639	318.412	315	273	382	30886	23.301	0.482	0.022	0.592
719	ID38525615	38525615	147	5.357	58.253	164.511	0	2882.256	6	0.500	1	-10921639	375.227	372	303	471	36397	28.097	1.900	0.020	0.527
720	ID38461481	38461481	147	5.979	58.759	164.724	0	3362.632	7	0.500	1	-10921639	372.402	369	295	459	36123	28.233	0.320	0.020	0.518
721	ID38587008	38587008	147	10.472	58.760	164.573	0	3843.008	8	0.500	1	-10921639	370.072	358	283	540	35897	45.213	1.900	0.031	0.491
722	ID38572774	38572774	147	7.138	58.895	164.823	0	4323.384	9	0.500	1	-10921639	351.041	345	296	433	34051	28.750	1.818	0.029	0.697
723	ID38428514	38428514	148	4.828	141.747	72.595	0	3362.632	7	0.500	1	-10921639	378.835	378	300	452	36747	25.190	0.488	0.015	0.444
724	ID38541122	38541122	148	5.908	140.659	71.352	0	3843.008	8	0.500	1	-10921639	357.041	353	298	478	34633	28.626	1.601	0.016	0.398
725	ID38524942	38524942	148	8.734	140.024	70.344	0	4323.384	9	0.500	1	-10921639	347.454	343	276	503	33703	39.058	1.805	0.029	0.500
726	ID38461155	38461155	149	4.976	95.337	164.021	0	3362.632	7	0.500	1	-10921639	359.825	357	306	450	34903	25.679	0.494	0.020	0.541
727	ID38586890	38586890	149	5.701	95.247	164.258	0	3843.008	8	0.500	1	-10921639	346.918	347	257	411	33651	24.278	0.722	0.026	0.735
728	ID38572639	38572639	149	4.682	95.062	164.185	0	4323.384	9	0.500	1	-10921639	333.887	334	267	398	32387	24.175	1.773	0.012	0.325
729	ID38433913	38433913	150	5.774	140.083	100.190	0	3362.632	7	0.500	1	-10921639	369.423	366	290	456	35834	30.000	1.900	0.013	0.325
730	ID38557146	38557146	150	4.430	140.238	99.740	0	3843.008	8	0.500	1	-10921639	346.258	344	259	434	33587	26.930	0.465	0.027	0.682
731	ID38539738	38539738	150	5.343	140.296	101.159	0	4323.384	9	0.500	1	-10921639	350.804	348	236	424	34028	27.383	1.669	0.023	0.565
732	ID38545181	38545181	151	6.076	165.898	192.558	0	2882.256	6	0.500	1	-10921639	376.082	371	303	488	36480	29.915	1.797	0.008	0.209
733	ID38472188	38472188	151	6.717	166.574	191.939	0	3362.632	7	0.500	1	-10921639	364.021	358	289	467	35310	30.395	1.900	0.021	0.502
734	ID38595865	38595865	151	7.244	165.919	192.109	0	3843.008	8	0.500	1	-10921639	356.814	348	271	444	34611	31.097	0.488	0.021	0.465
735	ID38442098	38442098	152	7.696	97.291	125.349	0	3362.632	7	0.500	1	-10921639	372.186	366	309	482	36102	32.641	0.471	0.024	0.524
736	ID38570474	38570474	152	4.799	96.494	125.705	0	3843.008	8	0.500	1	-10921639	352.052	352	268	440	34149	28.455	0.371	0.017	0.405
737	ID38556606	38556606	152	5.767	96.320	125.382	0	4323.384	9	0.500	1	-10921639	343.247	339	256	443	33295	30.097	1.398	0.013	0.289
738	ID38445559	38445559	153	5.547	207.597	139.752	0	3362.632	7	0.500	1	-10921639	349.814	347	300	434	33932	24.306	1.391	0.024	0.686
739	ID38576370	38576370	153	6.402	207.362	139.822	0	3843.008	8	0.500	1	-10921639	338.299	335	282	426	32815	25.877	1.813	0.021	0.546
740	ID38565893	38565893	153	4.623	207.086	140.748	0	4323.384	9	0.500	1	-10921639	314.340	312	247	389	30491	25.910	0.472	0.017	0.399
741	ID38693973	38693973	154	5.038	74.008	193.734	0	1921.504	4	0.500	1	-10921639	372.227	371	299	453	36106	23.989	1.900	0.019	0.593
742	ID38387154	38387154	154	4.622	73.561	193.937	0	2401.880	5	0.500	1	-10921639	366.464	362	318	438	35547	24.270	1.392	0.012	0.347
743	ID38504048	38504048	155	6.571	215.345	113.009	0	1441.128	3	0.500	1	-10921639	377.371	374	314	475	36605	29.674	1.762	0.023	0.577
744	ID38652161	38652161	155	7.096	214.925	113.506	0	1921.504	4	0.500	1	-10921639	377.990	374	316	480	36665	30.479	1.900	0.022	0.533
745	ID38364508	38364508	155	5.865	214.192	113.509	0	2401.880	5	0.500	1	-10921639	377.052	376	319	466	36574	27.644	1.589	0.019	0.511
746	ID38551993	38551993	156	5.195	0.500	200.106	0	1441.128	3	0.500	1	-10921639	388.196	385	315	467	37655	27.876	1.900	0.021	0.567
747	ID38695552	38695552	156	7.864	0.000	200.417	0	1921.504	4	0.500	1	-10921639	359.825	371	139	502	34903	72.513	1.592	0.068	0.628
748	ID38388459	38388459	156	5.422	0.000	200.525	0	2401.880	5	0.500	1	-10921639	343.536	362	132	485	33323	65.831	1.790	0.052	0.517
749	ID38671890	38671890	157	4.794	119.753	143.349	0	1921.504	4	0.500	1	-10921639	391.093	388	339	513	37936	25.418	1.698	0.016	0.473
750	ID38374095	38374095	157	3.885	120.112	144.083	0	2401.880	5	0.500	1	-10921639	385.608	387	327	460	37404	23.808	1.675	0.013	0.402
751	ID38689570	38689570	158	4.082	104.198	187.404	0	1921.504	4	0.500	1	-10921639	416.464	410	377	504	40397	21.398	1.793	0.005	0.190
752	ID38384684	38384684	158	3.987	104.179	187.347	0	2401.880	5	0.500	1	-10921639	416.866	419	354	506	40436	22.014	1.841	0.008	0.299
753	ID38700351	38700351	159	5.198	189.822	208.484	0	1921.504	4	0.500	1	-10921639	400.144	396	326	481	38814	27.746	0.485	0.011	0.322
754	ID38391079	38391079	159	5.184	189.751	209.105	0	2401.880	5	0.500	1	-10921639	397.794	392	356	460	38586	23.751	1.900	0.010	0.345
755	ID38475503	38475503	160	5.155	201.244	104.235	0	2882.256	6	0.500	1	-10921639	400.093	403	306	449	38809	25.289	1.604	0.015	0.458
756	ID38435412	38435412	160	4.229	201.880	104.150	0	3362.632	7	0.500	1	-10921639	378.619	381	297	449	36726	25.408	0.491	0.010	0.298
757	ID38485383	38485383	161	4.404	92.089	113.818	0	2882.256	6	0.500	1	-10921639	398.804	398	341	488	38684	29.190	1.804	0.015	0.403
758	ID38437595	38437595	161	3.835	91.321	112.899	0	3362.632	7	0.500	1	-10921639	409.763	409	297	483	39747	28.776	1.900	0.018	0.511
759	ID38540432	38540432	162	4.403	54.675	189.407	0	2882.256	6	0.500	1	-10921639	387.443	388	328	452	37582	23.845	0.493	0.017	0.553
760	ID38473309	38473309	162	4.788	54.793	189.497	0	3362.632	7	0.500	1	-10921639	378.557	377	324	441	36720	24.507	0.714	0.020	0.593
761	ID38536908	38536908	163	6.717	142.503	74.192	0	3843.008	8	0.500	1	-10921639	363.330	358	263	483	35243	32.179	1.830	0.027	0.588
762	ID38524277	38524277	163	11.152	142.854	75.606	0	4323.384	9	0.500	1	-10921639	353.753	347	241	516	34314	47.774	0.479	0.038	0.549
763	ID38498063	38498063	164	3.684	20.962	24.315	0	3843.008	8	0.500	1	-10921639	337.299	337	294	378	32718	20.145	1.817	0.015	0.488
764	ID38497855	38497855	164	3.676	19.801	23.139	0	4323.384	9	0.500	1	-10921639	316.577	318	250	371	30708	20.065	0.485	0.016	0.493
765	ID38494362	38494362	165	4.995	88.740	21.586	0	3843.008	8	0.500	1	-10921639	350.619	348	280	423	34010	24.866	0.492	0.019	0.539
766	ID38494214	38494214	165	5.177	87.760	21.000	0	4323.384	9	0.500	1	-10921639	330.247	328	284	431	32034	25.639	0.333	0.012	0.301
767	ID38605017	38605017	166	3.777	201.499	215.515	0	3843.008	8	0.500	1	-10921639	344.526	345	237	419	33419	21.725	1.414	0.013	0.399
768	ID38586327	38586327	166	6.375	200.717	216.616	0	4323.384	9	0.500	1	-10921639	335.423	331	263	432	32536	29.644	0.470	0.027	0.585
769	ID38476829	38476829	167	3.921	157.774	0.557	0	3843.008	8	0.500	1	-10921639	341.969	339	294	413	33171	21.457	1.900	0.017	0.543
770	ID38480960	38480960	167	4.958	157.259	0.987	0	4323.384	9	0.500	1	-10921639	331.557	327	289	429	32161	25.794	0.481	0.019	0.487
771	ID38517973	38517973	168	4.353	37.862	43.668	0	3843.008	8	0.500	1	-10921639	352.124	348	307	464	34156	25.025	1.900	0.015	0.415
772	ID38506196	38506196	168	4.170	38.571	43.091	0	4323.384	9	0.500	1	-10921639	337.629	335	229	435	32750	29.667	1.900	0.011	0.258
773	ID38556883	38556883	169	4.089	44.396	99.060	0	3843.008	8	0.500	1	-10921639	361.381	364	280	428	35054	27.567	1.797	0.003	0.070
774	ID38543653	38543653	169	4.204	44.192	99.335	0	4323.384	9	0.500	1	-10921639	349.763	352	279	396	33927	23.411	1.586	0.007	0.217
775	ID38493487	38493487	170	4.657	4.250	20.555	0	3843.008	8	0.500	1	-10921639	334.113	334	266	404	32409	21.503	1.796	0.019	0.587
776	ID38494425	38494425	170	7.398	2.793	21.100	0	4323.384	9	0.500	1	-10921639	323.773	319	258	426	31406	31.953	1.398	0.032	0.638
777	ID38571382	38571382	171	6.571	74.891	123.012	0	3843.008	8	0.500	1	-10921639	355.835	349	292	480	34516	32.526	1.601	0.014	0.312
778	ID38554497	38554497	171	4.193	75.302	123.648	0	4323.384	9	0.500	1	-10921639	341.433	336	294	417	33119	23.825	1.900	0.011	0.315
779	ID38530752	38530752	172	4.267	24.445	154.960	0	1441.128	3	0.500	1	-10921639	391.619	390	298	452	37987	25.889	1.791	0.009	0.282
780	ID38673742	38673742	172	4.160	23.570	155.664	0	1921.504	4	0.500	1	-10921639	389.237	389	314	453	37756	23.401	0.711	0.016	0.517
781	ID38508741	38508741	173	3.707	100.965	124.521	0	1441.128	3	0.500	1	-10921639	411.454	411	253	466	39911	27.051	1.845	0.013	0.404
782	ID38659076	38659076	173	4.176	100.716	124.335	0	1921.504	4	0.500	1	-10921639	406.619	407	344	472	39442	21.770	1.900	0.009	0.348
783	ID38559573	38559573	174	3.738	106.162	212.299	0	1441.128	3	0.500	1	-10921639	354.897	354	300	438	34425	21.467	1.809	0.007	0.240
784	ID38699490	38699490	174	4.077	106.284	212.273	0	1921.504	4	0.500	1	-10921639	350.423	348	299	402	33991	19.840	0.492	0.014	0.480
785	ID38521599	38521599	175	8.343	110.510	144.606	0	1441.128	3	0.500	1	-10921639	421.309	414	343	544	40867	39.040	1.817	0.022	0.466
786	ID38672390	38672390	175	8.396	110.880	144.800	0	1921.504	4	0.500	1	-10921639	413.825	406	346	550	40141	40.534	0.486	0.024	0.479
787	ID38512419	38512419	176	5.011	150.814	126.927	0	1441.128	3	0.500	1	-10921639	388.588	386	326	484	37693	25.107	1.900	0.008	0.231
788	ID38660504	38660504	176	4.051	150.697	127.247	0	1921.504	4	0.500	1	-10921639	369.732	373	264	439	35864	27.115	1.848	0.017	0.454
789	ID38509474	38509474	177	3.656	66.573	125.617	0	1441.128	3	0.500	1	-10921639	420.134	421	352	490	40753	24.952	1.900	0.012	0.413
790	ID38658718	38658718	177	4.712	66.901	123.602	0	1921.504	4	0.500	1	-10921639	435.557	434	388	508	42249	22.915	0.710	0.013	0.486
791	ID38503728	38503728	178	3.827	137.253	107.705	0	1441.128	3	0.500	1	-10921639	421.010	420	345	492	40838	26.794	1.690	0.006	0.176
792	ID38648365	38648365	178	3.656	136.906	107.632	0	1921.504	4	0.500	1	-10921639	420.237	421	357	472	40763	26.657	0.732	0.010	0.324
