# Supplementary material for: The structure of the Ctf19c/CCAN from budding yeast
Source: eLife journal article supplement (doi:10.7554/elife.44239), 2019-02-14
Supplement: supp [file set3_s14_mcherry.xls]

	Label	ID	TRACK_ID	QUALITY	POSITION_X	POSITION_Y	POSITION_Z	POSITION_T	FRAME	RADIUS	VISIBILITY	MANUAL_COLOR	MEAN_INTENSITY	MEDIAN_INTENSITY	MIN_INTENSITY	MAX_INTENSITY	TOTAL_INTENSITY	STANDARD_DEVIATION	ESTIMATED_DIAMETER	CONTRAST	SNR
1	ID39205378	39205378	0	2.365	41.570	125.548	0	0.000	0	0.500	1	-10921639	123.866	121	107	151	12015	8.791	0.709	0.026	0.720
2	ID39380307	39380307	0	2.152	42.527	125.391	0	480.376	1	0.500	1	-10921639	121.732	119	110	157	11808	9.239	0.485	0.024	0.620
3	ID39195224	39195224	0	2.241	42.859	125.785	0	960.752	2	0.500	1	-10921639	124.134	123	109	154	12041	8.995	0.713	0.021	0.579
4	ID39350444	39350444	0	2.350	42.824	125.635	0	1441.128	3	0.500	1	-10921639	124.010	122	111	168	12029	9.901	1.900	0.020	0.495
5	ID39413848	39413848	0	2.174	42.632	124.934	0	1921.504	4	0.500	1	-10921639	122.175	121	106	151	11851	8.374	0.484	0.026	0.750
6	ID39180443	39180443	0	2.071	42.426	124.563	0	2401.880	5	0.500	1	-10921639	122.536	120	110	150	11886	8.393	0.475	0.018	0.506
7	ID39289650	39289650	0	1.860	42.253	124.750	0	2882.256	6	0.500	1	-10921639	122.402	121	110	141	11873	7.075	0.491	0.020	0.673
8	ID39152403	39152403	0	1.324	42.420	124.651	0	3362.632	7	0.500	1	-10921639	120.773	120	110	146	11715	6.148	1.787	0.010	0.399
9	ID39348757	39348757	0	1.472	42.646	124.780	0	3843.008	8	0.500	1	-10921639	120.979	120	108	142	11735	6.810	0.488	0.013	0.464
10	ID39157998	39157998	0	1.081	43.000	125.125	0	4323.384	9	0.500	1	-10921639	120.742	120	110	145	11712	6.097	0.497	0.012	0.467
11	ID39208273	39208273	1	1.054	93.535	133.937	0	0.000	0	0.500	1	-10921639	120.660	119	110	145	11704	6.314	1.783	0.007	0.263
12	ID39382088	39382088	1	1.698	95.158	132.356	0	480.376	1	0.500	1	-10921639	123.093	122	112	163	11940	8.025	0.484	0.020	0.608
13	ID39201351	39201351	1	1.816	95.563	131.608	0	960.752	2	0.500	1	-10921639	122.969	121	109	170	11928	8.791	1.701	0.017	0.476
14	ID39352150	39352150	1	1.696	96.532	130.869	0	1441.128	3	0.500	1	-10921639	122.103	121	108	146	11844	7.597	0.480	0.019	0.596
15	ID39417691	39417691	1	1.690	96.009	132.244	0	1921.504	4	0.500	1	-10921639	122.763	120	111	164	11908	8.910	1.794	0.015	0.414
16	ID39185439	39185439	1	1.237	94.630	132.682	0	2401.880	5	0.500	1	-10921639	122.216	122	110	139	11855	5.976	0.487	0.011	0.449
17	ID39291485	39291485	1	1.480	94.823	132.161	0	2882.256	6	0.500	1	-10921639	122.680	121	111	144	11900	6.642	0.487	0.009	0.312
18	ID39159809	39159809	1	1.516	94.985	132.792	0	3362.632	7	0.500	1	-10921639	122.897	121	110	149	11921	7.408	1.900	0.015	0.487
19	ID39360326	39360326	1	1.135	95.928	133.055	0	3843.008	8	0.500	1	-10921639	122.794	121	111	148	11911	6.682	0.729	0.014	0.514
20	ID39165769	39165769	1	1.288	96.644	132.699	0	4323.384	9	0.500	1	-10921639	120.773	120	109	137	11715	6.592	0.486	0.015	0.540
21	ID39124777	39124777	2	0.970	208.859	52.966	0	960.752	2	0.500	1	-10921639	121.546	121	112	136	11790	5.616	0.712	0.011	0.472
22	ID39294708	39294708	2	1.037	208.757	52.960	0	1441.128	3	0.500	1	-10921639	121.825	121	109	137	11817	5.925	1.810	0.014	0.585
23	ID39371870	39371870	2	1.619	208.649	53.164	0	1921.504	4	0.500	1	-10921639	123.773	123	110	145	12006	6.462	0.707	0.015	0.578
24	ID39121117	39121117	2	1.248	208.347	53.199	0	2401.880	5	0.500	1	-10921639	124.103	124	113	149	12038	6.461	1.603	0.011	0.436
25	ID39205014	39205014	2	0.928	208.356	52.873	0	2882.256	6	0.500	1	-10921639	121.577	121	110	142	11793	5.739	0.495	0.013	0.536
26	ID39100173	39100173	2	0.903	208.741	52.621	0	3362.632	7	0.500	1	-10921639	121.278	120	109	134	11764	4.974	0.701	0.008	0.365
27	ID39172972	39172972	3	1.252	23.694	87.513	0	0.000	0	0.500	1	-10921639	121.423	121	111	142	11778	6.070	1.784	0.010	0.399
28	ID39344541	39344541	3	1.090	24.727	87.078	0	480.376	1	0.500	1	-10921639	121.124	121	108	150	11749	7.009	0.497	0.013	0.451
29	ID39153247	39153247	3	0.940	24.101	86.123	0	960.752	2	0.500	1	-10921639	120.268	120	110	143	11666	6.467	1.412	0.007	0.240
30	ID39324748	39324748	3	0.919	24.396	86.670	0	1441.128	3	0.500	1	-10921639	119.381	119	107	143	11580	5.940	1.900	0.011	0.443
31	ID39393105	39393105	3	0.919	23.873	85.976	0	1921.504	4	0.500	1	-10921639	120.237	119	110	144	11663	5.760	0.706	0.007	0.283
32	ID39397025	39397025	3	0.923	24.462	87.022	0	1921.504	4	0.500	1	-10921639	119.010	118	110	140	11544	5.606	0.496	0.008	0.352
33	ID39156048	39156048	3	1.289	22.942	84.986	0	2401.880	5	0.500	1	-10921639	118.227	117	107	147	11468	6.963	1.790	0.013	0.448
34	ID39148701	39148701	3	1.381	24.434	87.455	0	2401.880	5	0.500	1	-10921639	118.938	118	108	146	11537	6.934	0.483	0.015	0.522
35	ID39249845	39249845	3	1.490	23.269	85.074	0	2882.256	6	0.500	1	-10921639	119.794	118	109	152	11620	7.632	0.319	0.016	0.502
36	ID39248958	39248958	3	1.711	24.795	89.064	0	2882.256	6	0.500	1	-10921639	121.351	120	110	148	11771	7.651	0.472	0.011	0.335
37	ID39122323	39122323	3	1.695	22.302	84.854	0	3362.632	7	0.500	1	-10921639	119.340	117	108	173	11576	8.636	0.321	0.019	0.507
38	ID39125279	39125279	3	1.481	25.489	89.767	0	3362.632	7	0.500	1	-10921639	119.660	118	111	148	11607	6.852	0.491	0.014	0.482
39	ID39323835	39323835	3	1.643	23.653	85.352	0	3843.008	8	0.500	1	-10921639	119.969	118	108	145	11637	7.604	0.483	0.018	0.564
40	ID39325109	39325109	3	1.415	24.845	89.439	0	3843.008	8	0.500	1	-10921639	120.866	120	110	153	11724	7.193	0.485	0.014	0.458
41	ID39106931	39106931	3	1.099	23.308	85.913	0	4323.384	9	0.500	1	-10921639	118.433	118	109	139	11488	5.633	1.808	0.013	0.533
42	ID39109865	39109865	3	1.199	25.231	88.958	0	4323.384	9	0.500	1	-10921639	118.969	118	108	141	11540	6.325	1.900	0.013	0.498
43	ID39318768	39318768	4	1.296	136.728	80.809	0	1441.128	3	0.500	1	-10921639	122.351	122	111	140	11868	6.110	0.477	0.014	0.560
44	ID39388752	39388752	4	1.225	137.475	81.155	0	1921.504	4	0.500	1	-10921639	122.134	122	112	136	11847	5.695	1.619	0.013	0.569
45	ID39143859	39143859	4	1.110	137.260	81.029	0	2401.880	5	0.500	1	-10921639	122.907	123	110	142	11922	5.998	1.796	0.010	0.407
46	ID39245964	39245964	4	1.098	139.061	78.248	0	2882.256	6	0.500	1	-10921639	120.309	119	107	158	11670	6.763	1.900	0.016	0.563
47	ID39265624	39265624	5	0.980	94.957	182.911	0	960.752	2	0.500	1	-10921639	120.629	120	108	135	11701	4.938	0.490	0.011	0.532
48	ID39385752	39385752	5	1.188	95.097	182.629	0	1441.128	3	0.500	1	-10921639	121.515	121	109	140	11787	5.714	1.094	0.008	0.328
49	ID39430484	39430484	5	1.113	95.332	182.813	0	1921.504	4	0.500	1	-10921639	122.165	122	110	135	11850	5.371	0.715	0.009	0.396
50	ID39245360	39245360	5	1.044	94.833	182.977	0	2401.880	5	0.500	1	-10921639	121.979	122	113	138	11832	4.905	0.710	0.009	0.447
51	ID39322172	39322172	5	1.246	94.965	183.189	0	2882.256	6	0.500	1	-10921639	122.608	123	113	137	11893	5.478	0.719	0.014	0.633
52	ID39207149	39207149	5	1.443	95.238	183.323	0	3362.632	7	0.500	1	-10921639	123.124	123	112	140	11943	5.976	0.705	0.015	0.618
53	ID39388180	39388180	5	1.033	95.079	183.647	0	3843.008	8	0.500	1	-10921639	121.680	121	110	141	11803	5.516	1.778	0.011	0.492
54	ID39241906	39241906	6	1.729	195.185	171.895	0	0.000	0	0.500	1	-10921639	122.536	121	111	153	11886	7.958	1.900	0.016	0.498
55	ID39412492	39412492	6	1.650	195.783	172.089	0	480.376	1	0.500	1	-10921639	121.454	120	111	144	11781	6.444	1.900	0.016	0.597
56	ID39250009	39250009	6	1.034	195.638	171.801	0	960.752	2	0.500	1	-10921639	119.206	118	107	137	11563	5.948	1.900	0.010	0.383
57	ID39383606	39383606	6	0.994	197.769	173.910	0	1441.128	3	0.500	1	-10921639	120.330	119	109	139	11672	5.398	1.395	0.014	0.610
58	ID39429719	39429719	6	1.167	197.960	173.763	0	1921.504	4	0.500	1	-10921639	120.938	121	110	137	11731	5.398	1.600	0.010	0.432
59	ID39232249	39232249	6	1.075	197.710	174.212	0	2401.880	5	0.500	1	-10921639	120.804	120	105	148	11718	6.552	1.832	0.014	0.515
60	ID39115949	39115949	7	1.395	83.695	16.130	0	0.000	0	0.500	1	-10921639	123.680	122	109	154	11997	7.918	1.900	0.013	0.397
61	ID39288643	39288643	7	1.034	84.516	16.567	0	480.376	1	0.500	1	-10921639	122.567	122	112	136	11889	4.977	0.495	0.008	0.408
62	ID39097520	39097520	7	1.085	84.503	16.640	0	960.752	2	0.500	1	-10921639	123.278	122	112	158	11958	6.446	1.607	0.010	0.381
63	ID39254691	39254691	7	0.966	83.567	16.251	0	1441.128	3	0.500	1	-10921639	123.732	123	113	143	12002	6.087	1.210	0.006	0.243
64	ID39340375	39340375	7	1.099	84.203	15.856	0	1921.504	4	0.500	1	-10921639	122.938	122	108	140	11925	5.675	1.612	0.008	0.335
65	ID39103891	39103891	7	1.506	84.631	16.387	0	2401.880	5	0.500	1	-10921639	124.227	124	112	150	12050	6.217	1.603	0.016	0.645
66	ID39171127	39171127	7	1.707	83.837	16.682	0	2882.256	6	0.500	1	-10921639	124.082	122	112	160	12036	8.457	0.492	0.018	0.508
67	ID39272177	39272177	8	1.022	48.871	203.423	0	0.000	0	0.500	1	-10921639	122.619	122	112	141	11894	5.446	0.702	0.007	0.317
68	ID39423494	39423494	8	1.208	49.793	203.241	0	480.376	1	0.500	1	-10921639	121.392	120	111	151	11775	6.512	1.900	0.016	0.587
69	ID39290411	39290411	8	0.934	49.798	202.453	0	960.752	2	0.500	1	-10921639	120.639	120	110	139	11702	5.292	1.802	0.008	0.343
70	ID39400561	39400561	8	1.156	50.190	205.373	0	1441.128	3	0.500	1	-10921639	121.392	120	112	140	11775	6.027	0.730	0.013	0.533
71	ID39434582	39434582	8	1.148	50.716	206.250	0	1921.504	4	0.500	1	-10921639	119.979	119	109	137	11638	5.895	1.399	0.015	0.621
72	ID39269169	39269169	8	1.176	50.461	206.111	0	2401.880	5	0.500	1	-10921639	120.732	120	109	146	11711	6.501	1.765	0.014	0.519
73	ID39337019	39337019	8	1.156	49.940	205.633	0	2882.256	6	0.500	1	-10921639	120.814	119	106	144	11719	6.800	0.491	0.009	0.330
74	ID39222391	39222391	8	1.167	50.007	205.489	0	3362.632	7	0.500	1	-10921639	121.804	122	111	143	11815	5.972	1.600	0.009	0.368
75	ID39129316	39129316	9	1.675	39.584	35.510	0	0.000	0	0.500	1	-10921639	122.680	121	109	142	11900	7.271	0.483	0.010	0.334
76	ID39301810	39301810	9	1.606	40.546	35.263	0	480.376	1	0.500	1	-10921639	122.969	122	110	159	11928	8.343	1.388	0.013	0.377
77	ID39106852	39106852	9	1.692	40.977	35.996	0	960.752	2	0.500	1	-10921639	122.082	120	108	146	11842	7.139	0.487	0.019	0.642
78	ID39267521	39267521	9	1.540	40.823	34.194	0	1441.128	3	0.500	1	-10921639	123.742	122	113	144	12003	6.588	0.704	0.016	0.584
79	ID39361608	39361608	9	1.475	41.258	34.456	0	1921.504	4	0.500	1	-10921639	123.557	123	110	158	11985	6.810	1.848	0.017	0.596
80	ID39105077	39105077	9	1.430	40.909	33.962	0	2401.880	5	0.500	1	-10921639	123.144	122	109	148	11945	6.954	0.489	0.014	0.504
81	ID39194614	39194614	9	1.145	40.742	34.448	0	2882.256	6	0.500	1	-10921639	122.196	121	110	150	11853	6.857	1.794	0.004	0.138
82	ID39090698	39090698	9	1.110	41.527	34.108	0	3362.632	7	0.500	1	-10921639	123.155	123	113	142	11946	5.987	1.400	0.006	0.264
83	ID39282937	39282937	9	1.153	41.232	34.200	0	3843.008	8	0.500	1	-10921639	121.701	122	110	144	11805	5.668	0.480	0.011	0.483
84	ID39151415	39151415	10	2.056	50.094	62.489	0	0.000	0	0.500	1	-10921639	124.031	122	112	152	12031	8.242	1.900	0.023	0.680
85	ID39323069	39323069	10	2.196	50.782	62.044	0	480.376	1	0.500	1	-10921639	124.866	123	111	159	12112	8.802	0.491	0.023	0.626
86	ID39131896	39131896	10	1.790	50.584	62.070	0	960.752	2	0.500	1	-10921639	124.041	123	109	146	12032	7.429	0.484	0.020	0.640
87	ID39307338	39307338	10	1.248	51.061	61.823	0	1441.128	3	0.500	1	-10921639	122.433	122	111	147	11876	5.879	1.900	0.013	0.548
88	ID39379272	39379272	10	1.443	51.031	62.148	0	1921.504	4	0.500	1	-10921639	123.505	122	111	141	11980	6.585	1.900	0.016	0.581
89	ID39136805	39136805	10	1.118	51.073	62.361	0	2401.880	5	0.500	1	-10921639	123.021	123	112	148	11933	5.809	1.900	0.008	0.348
90	ID39216592	39216592	10	1.050	51.937	62.371	0	2882.256	6	0.500	1	-10921639	121.608	121	112	138	11796	5.785	1.900	0.012	0.482
91	ID39172983	39172983	11	1.508	26.576	87.567	0	0.000	0	0.500	1	-10921639	120.938	120	110	144	11731	7.127	1.900	0.014	0.477
92	ID39345131	39345131	11	1.623	27.194	87.275	0	480.376	1	0.500	1	-10921639	122.711	121	114	141	11903	6.108	0.489	0.014	0.573
93	ID39154478	39154478	11	1.542	27.184	87.437	0	960.752	2	0.500	1	-10921639	120.784	120	109	149	11716	6.815	0.493	0.021	0.712
94	ID39324687	39324687	11	1.363	27.767	86.520	0	1441.128	3	0.500	1	-10921639	122.660	122	111	140	11898	5.797	1.198	0.004	0.182
95	ID39396937	39396937	11	1.638	28.236	86.877	0	1921.504	4	0.500	1	-10921639	121.670	121	110	147	11802	6.590	1.900	0.015	0.546
96	ID39156796	39156796	11	1.454	28.377	86.990	0	2401.880	5	0.500	1	-10921639	122.309	122	110	143	11864	6.397	0.720	0.015	0.573
97	ID39246920	39246920	11	0.955	27.407	86.911	0	2882.256	6	0.500	1	-10921639	120.247	119	111	135	11664	5.089	0.728	0.006	0.294
98	ID39239334	39239334	12	0.950	89.322	173.714	0	0.000	0	0.500	1	-10921639	121.794	121	111	137	11814	5.006	1.769	0.010	0.480
99	ID39412954	39412954	12	1.020	90.431	173.489	0	480.376	1	0.500	1	-10921639	120.814	120	109	138	11719	5.974	0.493	0.011	0.459
100	ID39253465	39253465	12	1.295	90.064	173.011	0	960.752	2	0.500	1	-10921639	122.753	121	111	147	11907	7.105	0.708	0.008	0.272
101	ID39380270	39380270	12	1.627	89.643	173.121	0	1441.128	3	0.500	1	-10921639	122.845	121	111	143	11916	7.041	1.841	0.017	0.587
102	ID39430725	39430725	12	0.932	90.034	173.091	0	1921.504	4	0.500	1	-10921639	121.052	120	110	137	11742	5.962	1.623	0.008	0.320
103	ID39222350	39222350	12	1.039	89.569	173.419	0	2401.880	5	0.500	1	-10921639	121.000	120	109	142	11737	6.466	1.602	0.011	0.414
104	ID39319839	39319839	12	1.188	90.758	173.585	0	2882.256	6	0.500	1	-10921639	121.412	120	110	139	11777	6.313	0.490	0.012	0.467
105	ID39197470	39197470	12	0.923	90.741	173.597	0	3362.632	7	0.500	1	-10921639	120.629	120	107	136	11701	5.598	0.707	0.007	0.316
106	ID39377571	39377571	12	1.034	90.649	173.764	0	3843.008	8	0.500	1	-10921639	120.464	119	108	157	11685	6.458	1.900	0.010	0.376
107	ID39224329	39224329	12	0.907	90.269	173.745	0	4323.384	9	0.500	1	-10921639	120.237	120	111	137	11663	5.522	1.900	0.008	0.360
108	ID39130389	39130389	13	1.987	136.738	28.188	0	0.000	0	0.500	1	-10921639	125.423	123	112	167	12166	8.880	1.785	0.020	0.546
109	ID39296653	39296653	13	1.828	137.199	27.513	0	480.376	1	0.500	1	-10921639	125.000	123	113	152	12125	8.299	0.703	0.014	0.413
110	ID39104958	39104958	13	1.606	137.373	28.340	0	960.752	2	0.500	1	-10921639	124.093	123	112	152	12037	6.850	0.488	0.016	0.587
111	ID39259979	39259979	13	1.065	137.430	27.633	0	1441.128	3	0.500	1	-10921639	122.454	122	113	135	11878	5.013	1.829	0.016	0.753
112	ID39345989	39345989	13	1.521	137.937	27.582	0	1921.504	4	0.500	1	-10921639	123.711	123	113	150	12000	7.114	0.710	0.013	0.436
113	ID39107625	39107625	13	1.291	138.147	27.212	0	2401.880	5	0.500	1	-10921639	123.402	123	112	143	11970	5.891	1.397	0.011	0.474
114	ID39189629	39189629	13	1.112	138.432	28.568	0	2882.256	6	0.500	1	-10921639	123.155	122	113	136	11946	5.333	0.699	0.007	0.337
115	ID39085023	39085023	13	1.482	138.804	28.995	0	3362.632	7	0.500	1	-10921639	122.753	121	111	164	11907	7.825	1.775	0.017	0.534
116	ID39276518	39276518	13	1.374	138.445	28.447	0	3843.008	8	0.500	1	-10921639	124.062	123	111	145	12034	6.440	1.900	0.014	0.542
117	ID39076405	39076405	13	1.300	138.796	29.448	0	4323.384	9	0.500	1	-10921639	122.165	121	111	143	11850	6.125	1.900	0.010	0.400
118	ID39173561	39173561	14	1.497	193.447	92.560	0	0.000	0	0.500	1	-10921639	118.526	117	109	143	11497	6.891	0.489	0.016	0.527
119	ID39353035	39353035	14	0.969	194.478	92.515	0	480.376	1	0.500	1	-10921639	117.526	117	107	147	11400	5.570	0.487	0.011	0.473
120	ID39161653	39161653	14	0.979	194.992	92.204	0	960.752	2	0.500	1	-10921639	119.588	119	110	136	11600	5.174	0.491	0.003	0.134
121	ID39399492	39399492	14	0.918	195.730	91.936	0	1921.504	4	0.500	1	-10921639	118.454	118	110	137	11490	5.068	0.488	0.007	0.315
122	ID39150741	39150741	14	0.981	195.989	91.720	0	2401.880	5	0.500	1	-10921639	119.588	119	111	132	11600	5.163	1.685	0.010	0.460
123	ID39257097	39257097	14	0.997	195.462	91.039	0	2882.256	6	0.500	1	-10921639	119.649	119	112	131	11606	4.682	1.394	0.010	0.482
124	ID39126221	39126221	14	1.097	196.000	91.248	0	3362.632	7	0.500	1	-10921639	120.103	119	109	138	11650	5.783	0.716	0.015	0.604
125	ID39326837	39326837	14	1.223	195.308	91.723	0	3843.008	8	0.500	1	-10921639	120.041	119	108	135	11644	6.003	0.492	0.010	0.382
126	ID39125345	39125345	15	1.110	105.524	25.630	0	0.000	0	0.500	1	-10921639	122.103	122	112	141	11844	5.987	1.900	0.010	0.411
127	ID39293835	39293835	15	1.119	104.815	25.807	0	480.376	1	0.500	1	-10921639	122.670	122	112	138	11899	5.735	0.493	0.010	0.422
128	ID39101894	39101894	15	1.223	104.865	24.994	0	960.752	2	0.500	1	-10921639	122.258	121	113	144	11859	6.064	1.802	0.009	0.355
129	ID39265008	39265008	15	1.067	104.053	24.550	0	1441.128	3	0.500	1	-10921639	121.629	122	111	137	11798	5.399	1.900	0.008	0.348
130	ID39353200	39353200	15	0.919	103.610	25.587	0	1921.504	4	0.500	1	-10921639	120.330	120	111	142	11672	5.733	1.900	0.010	0.425
131	ID39100732	39100732	15	1.391	104.696	25.823	0	2401.880	5	0.500	1	-10921639	122.866	122	113	160	11918	7.125	0.482	0.010	0.327
132	ID39184343	39184343	15	1.021	103.750	25.187	0	2882.256	6	0.500	1	-10921639	120.938	119	112	138	11731	5.373	1.900	0.007	0.334
133	ID39082800	39082800	15	1.214	103.414	25.706	0	3362.632	7	0.500	1	-10921639	121.299	121	112	136	11766	5.453	0.713	0.016	0.684
134	ID39138923	39138923	16	1.676	18.324	49.309	0	0.000	0	0.500	1	-10921639	124.897	124	112	146	12115	6.803	0.486	0.012	0.452
135	ID39310187	39310187	16	1.103	19.211	49.333	0	480.376	1	0.500	1	-10921639	121.732	121	111	145	11808	6.131	1.900	0.007	0.271
136	ID39121580	39121580	16	1.299	19.483	49.207	0	960.752	2	0.500	1	-10921639	122.773	122	112	140	11909	6.259	1.900	0.009	0.357
137	ID39284403	39284403	16	1.418	19.635	49.118	0	1441.128	3	0.500	1	-10921639	122.206	121	111	153	11854	7.201	0.490	0.015	0.510
138	ID39372401	39372401	16	0.925	19.538	49.303	0	1921.504	4	0.500	1	-10921639	120.753	120	108	138	11713	5.701	1.799	0.010	0.426
139	ID39125916	39125916	16	1.093	19.523	49.143	0	2401.880	5	0.500	1	-10921639	121.990	122	110	142	11833	6.227	1.788	0.010	0.394
140	ID39209191	39209191	16	0.990	19.474	49.624	0	2882.256	6	0.500	1	-10921639	121.186	121	109	143	11755	6.261	0.314	0.008	0.309
141	ID39208327	39208327	16	1.232	19.179	48.550	0	2882.256	6	0.500	1	-10921639	121.392	120	111	141	11775	6.268	0.701	0.016	0.615
142	ID39095766	39095766	16	1.477	20.387	51.028	0	3362.632	7	0.500	1	-10921639	120.402	119	108	144	11679	7.706	1.794	0.018	0.553
143	ID39098066	39098066	16	1.775	18.485	47.353	0	3362.632	7	0.500	1	-10921639	123.402	121	111	158	11970	8.869	0.485	0.015	0.404
144	ID39303162	39303162	16	1.192	20.168	51.938	0	3843.008	8	0.500	1	-10921639	119.000	118	108	141	11543	6.671	1.802	0.013	0.455
145	ID39300263	39300263	16	1.573	18.899	46.798	0	3843.008	8	0.500	1	-10921639	122.206	120	112	148	11854	7.555	1.900	0.012	0.387
146	ID39082668	39082668	16	1.457	20.171	51.505	0	4323.384	9	0.500	1	-10921639	122.000	121	110	155	11834	7.280	0.712	0.013	0.422
147	ID39080043	39080043	16	1.417	18.273	48.325	0	4323.384	9	0.500	1	-10921639	121.381	120	110	140	11774	6.686	0.493	0.013	0.458
148	ID39212542	39212542	17	1.148	117.829	143.416	0	0.000	0	0.500	1	-10921639	120.876	120	110	144	11725	6.583	1.775	0.010	0.377
149	ID39395862	39395862	17	1.112	117.446	142.100	0	480.376	1	0.500	1	-10921639	120.825	120	108	139	11720	5.972	0.695	0.011	0.431
150	ID39214717	39214717	17	1.183	116.148	141.302	0	960.752	2	0.500	1	-10921639	119.485	119	107	141	11590	5.861	1.900	0.009	0.369
151	ID39360996	39360996	17	1.028	116.841	141.095	0	1441.128	3	0.500	1	-10921639	119.412	118	109	133	11583	5.530	1.900	0.015	0.624
152	ID39419504	39419504	17	0.997	117.875	141.260	0	1921.504	4	0.500	1	-10921639	119.433	119	108	135	11585	5.334	0.493	0.010	0.443
153	ID39195437	39195437	17	1.106	117.965	142.389	0	2401.880	5	0.500	1	-10921639	120.144	119	110	150	11654	6.478	1.900	0.009	0.342
154	ID39420411	39420411	18	1.494	135.097	191.550	0	480.376	1	0.500	1	-10921639	124.454	123	110	159	12072	7.833	1.798	0.017	0.528
155	ID39281204	39281204	18	1.641	134.957	191.375	0	960.752	2	0.500	1	-10921639	125.021	124	113	164	12127	7.910	1.597	0.015	0.481
156	ID39389820	39389820	18	1.528	134.818	191.446	0	1441.128	3	0.500	1	-10921639	123.351	122	111	150	11965	8.137	1.776	0.022	0.653
157	ID39433331	39433331	18	1.270	134.935	192.276	0	1921.504	4	0.500	1	-10921639	121.814	120	110	140	11816	6.333	1.601	0.016	0.608
158	ID39247528	39247528	18	1.422	135.103	193.217	0	2401.880	5	0.500	1	-10921639	122.186	121	110	148	11852	6.986	1.900	0.017	0.579
159	ID39330654	39330654	18	1.886	136.387	195.663	0	2882.256	6	0.500	1	-10921639	122.866	121	109	148	11918	7.694	0.486	0.019	0.600
160	ID39395021	39395021	18	1.827	135.354	196.209	0	3843.008	8	0.500	1	-10921639	122.237	120	111	150	11857	7.730	0.488	0.016	0.493
161	ID39246842	39246842	18	1.480	136.084	196.041	0	4323.384	9	0.500	1	-10921639	122.876	122	113	140	11919	5.606	0.493	0.007	0.316
162	ID39327605	39327605	19	1.947	194.350	0.000	0	1921.504	4	0.500	1	-10921639	114.206	118	46	160	11078	21.716	1.796	0.054	0.541
163	ID39088627	39088627	19	0.932	193.507	0.602	0	2401.880	5	0.500	1	-10921639	120.454	120	109	133	11684	5.557	1.900	0.011	0.467
164	ID39423604	39423604	20	1.069	70.819	157.725	0	1921.504	4	0.500	1	-10921639	121.041	121	110	148	11741	6.243	1.771	0.008	0.321
165	ID39206568	39206568	20	1.395	70.542	157.732	0	2401.880	5	0.500	1	-10921639	122.979	122	110	154	11929	7.213	1.900	0.013	0.443
166	ID39311416	39311416	20	1.408	70.722	157.879	0	2882.256	6	0.500	1	-10921639	121.082	120	109	153	11745	7.254	0.704	0.020	0.642
167	ID39175965	39175965	20	1.592	70.907	157.626	0	3362.632	7	0.500	1	-10921639	122.268	120	109	153	11860	8.185	0.706	0.020	0.587
168	ID39370874	39370874	20	0.973	70.411	157.672	0	3843.008	8	0.500	1	-10921639	119.784	119	109	146	11619	6.114	1.817	0.013	0.484
169	ID39201691	39201691	20	0.942	70.204	157.868	0	4323.384	9	0.500	1	-10921639	119.814	119	111	151	11622	6.006	1.609	0.013	0.504
170	ID39274502	39274502	21	1.181	55.107	190.471	0	960.752	2	0.500	1	-10921639	122.000	121	112	149	11834	6.580	0.321	0.013	0.467
171	ID39392511	39392511	21	1.187	54.531	189.798	0	1441.128	3	0.500	1	-10921639	122.711	122	113	135	11903	5.479	1.900	0.014	0.599
172	ID39432052	39432052	21	1.317	55.071	189.366	0	1921.504	4	0.500	1	-10921639	123.505	123	111	150	11980	6.372	1.616	0.014	0.533
173	ID39250147	39250147	21	1.126	54.873	189.448	0	2401.880	5	0.500	1	-10921639	122.619	122	113	138	11894	5.624	1.900	0.012	0.529
174	ID39328300	39328300	21	1.267	54.504	189.519	0	2882.256	6	0.500	1	-10921639	123.031	122	112	141	11934	6.852	1.802	0.011	0.406
175	ID39204257	39204257	21	0.942	54.560	189.773	0	3362.632	7	0.500	1	-10921639	122.227	121	111	143	11856	5.637	1.900	0.007	0.300
176	ID39386232	39386232	21	1.131	54.578	190.125	0	3843.008	8	0.500	1	-10921639	121.588	121	113	145	11794	6.145	1.788	0.014	0.537
177	ID39245714	39245714	21	1.265	54.411	192.106	0	4323.384	9	0.500	1	-10921639	121.866	121	108	142	11821	6.655	0.706	0.018	0.640
178	ID39225996	39225996	22	1.833	9.972	157.036	0	0.000	0	0.500	1	-10921639	122.340	121	108	146	11867	8.325	0.483	0.013	0.371
179	ID39402217	39402217	22	1.513	9.770	157.835	0	480.376	1	0.500	1	-10921639	121.732	121	110	142	11808	6.582	0.477	0.015	0.545
180	ID39234966	39234966	22	1.443	9.328	157.926	0	960.752	2	0.500	1	-10921639	122.052	122	109	141	11839	6.920	0.732	0.016	0.555
181	ID39423595	39423595	22	0.899	9.098	157.695	0	1921.504	4	0.500	1	-10921639	119.804	119	110	137	11621	5.548	1.900	0.010	0.428
182	ID39206752	39206752	22	1.260	9.202	157.931	0	2401.880	5	0.500	1	-10921639	121.371	121	111	143	11773	6.064	0.492	0.015	0.603
183	ID39311400	39311400	22	1.358	9.316	157.889	0	2882.256	6	0.500	1	-10921639	121.629	121	109	142	11798	6.678	1.812	0.010	0.372
184	ID39405674	39405674	23	0.956	146.489	101.324	0	1921.504	4	0.500	1	-10921639	119.392	119	109	138	11581	5.125	0.491	0.004	0.202
185	ID39166522	39166522	23	0.897	145.765	101.343	0	2401.880	5	0.500	1	-10921639	119.361	119	110	134	11578	5.445	1.790	0.010	0.447
186	ID39131768	39131768	23	1.451	146.061	101.643	0	3362.632	7	0.500	1	-10921639	121.423	120	107	154	11778	7.343	1.602	0.012	0.403
187	ID39335555	39335555	23	1.032	145.739	101.828	0	3843.008	8	0.500	1	-10921639	120.381	120	112	138	11677	5.444	1.406	0.012	0.523
188	ID39101381	39101381	24	1.513	34.307	22.699	0	960.752	2	0.500	1	-10921639	122.113	121	112	142	11845	6.639	1.596	0.015	0.528
189	ID39262876	39262876	24	1.200	35.491	23.338	0	1441.128	3	0.500	1	-10921639	122.155	121	112	148	11849	5.722	1.810	0.009	0.364
190	ID39344492	39344492	24	1.496	36.510	23.028	0	1921.504	4	0.500	1	-10921639	123.041	121	110	142	11935	7.007	0.704	0.007	0.230
191	ID39098231	39098231	24	1.323	36.214	22.315	0	2401.880	5	0.500	1	-10921639	122.557	122	113	140	11888	6.408	0.708	0.014	0.527
192	ID39178807	39178807	24	1.077	35.615	21.908	0	2882.256	6	0.500	1	-10921639	121.526	121	111	138	11788	5.666	1.789	0.011	0.452
193	ID39083088	39083088	24	1.322	35.610	22.187	0	3362.632	7	0.500	1	-10921639	122.649	121	111	142	11897	6.489	1.819	0.014	0.513
194	ID39269439	39269439	24	1.539	35.658	22.428	0	3843.008	8	0.500	1	-10921639	123.577	121	112	150	11987	7.568	1.816	0.010	0.336
195	ID39075763	39075763	24	1.264	35.657	22.259	0	4323.384	9	0.500	1	-10921639	122.381	122	111	138	11871	5.832	1.820	0.011	0.463
196	ID39159486	39159486	25	1.931	191.053	75.575	0	0.000	0	0.500	1	-10921639	123.041	121	111	149	11935	8.044	0.485	0.015	0.462
197	ID39339681	39339681	25	2.074	192.448	75.286	0	480.376	1	0.500	1	-10921639	123.619	123	110	155	11991	7.756	0.711	0.018	0.577
198	ID39142229	39142229	25	1.609	192.392	73.777	0	960.752	2	0.500	1	-10921639	122.495	121	110	144	11882	6.827	1.900	0.013	0.470
199	ID39311680	39311680	25	1.520	192.121	73.540	0	1441.128	3	0.500	1	-10921639	121.959	121	110	146	11830	6.696	1.900	0.016	0.559
200	ID39385711	39385711	25	1.234	192.099	73.452	0	1921.504	4	0.500	1	-10921639	120.515	120	111	139	11690	6.181	1.666	0.015	0.574
201	ID39137810	39137810	25	1.481	191.867	73.507	0	2401.880	5	0.500	1	-10921639	122.113	122	112	145	11845	6.739	0.716	0.013	0.462
202	ID39234732	39234732	25	1.497	191.900	73.703	0	2882.256	6	0.500	1	-10921639	122.113	121	110	148	11845	6.920	1.900	0.017	0.574
203	ID39114097	39114097	25	1.351	191.997	73.635	0	3362.632	7	0.500	1	-10921639	120.969	120	109	150	11734	6.881	0.712	0.017	0.598
204	ID39216583	39216583	26	1.206	121.168	145.718	0	960.752	2	0.500	1	-10921639	120.464	120	108	149	11685	6.753	0.482	0.015	0.539
205	ID39365317	39365317	26	1.463	121.229	144.145	0	1441.128	3	0.500	1	-10921639	120.557	119	110	143	11694	6.881	0.474	0.011	0.387
206	ID39419246	39419246	26	0.998	119.784	143.381	0	1921.504	4	0.500	1	-10921639	120.526	120	111	140	11691	4.880	1.271	0.009	0.459
207	ID39196618	39196618	26	1.211	120.091	143.948	0	2401.880	5	0.500	1	-10921639	120.856	120	111	138	11723	5.690	0.475	0.012	0.489
208	ID39302739	39302739	26	1.052	120.921	144.003	0	2882.256	6	0.500	1	-10921639	120.649	119	108	137	11703	6.205	1.778	0.012	0.467
209	ID39363796	39363796	26	1.108	119.625	145.254	0	3843.008	8	0.500	1	-10921639	120.825	120	108	144	11720	5.763	1.495	0.012	0.503
210	ID39187064	39187064	26	1.728	119.744	144.834	0	4323.384	9	0.500	1	-10921639	122.639	121	111	146	11896	7.354	0.482	0.020	0.670
211	ID39240469	39240469	27	1.600	143.460	174.917	0	0.000	0	0.500	1	-10921639	123.423	122	109	153	11972	7.276	1.808	0.015	0.500
212	ID39413006	39413006	27	1.958	144.592	175.030	0	480.376	1	0.500	1	-10921639	123.443	122	105	151	11974	8.101	1.900	0.022	0.663
213	ID39255906	39255906	27	1.029	144.541	174.955	0	960.752	2	0.500	1	-10921639	122.216	121	113	142	11855	5.266	1.798	0.008	0.346
214	ID39380669	39380669	27	0.906	144.295	175.287	0	1441.128	3	0.500	1	-10921639	121.825	121	109	136	11817	5.489	1.097	0.006	0.274
215	ID39429998	39429998	27	1.166	144.583	174.928	0	1921.504	4	0.500	1	-10921639	122.278	122	111	142	11861	6.511	0.496	0.007	0.273
216	ID39233241	39233241	27	1.200	144.651	174.986	0	2401.880	5	0.500	1	-10921639	121.959	121	110	150	11830	6.344	1.684	0.009	0.343
217	ID39413857	39413857	28	0.899	74.184	124.862	0	1921.504	4	0.500	1	-10921639	119.577	118	109	136	11599	5.618	0.496	0.005	0.230
218	ID39180864	39180864	28	1.311	74.280	125.115	0	2401.880	5	0.500	1	-10921639	120.433	119	109	141	11682	6.385	0.708	0.018	0.661
219	ID39289756	39289756	28	1.083	74.755	125.138	0	2882.256	6	0.500	1	-10921639	119.639	119	108	146	11605	6.110	1.900	0.011	0.432
220	ID39290105	39290105	28	0.968	73.539	126.019	0	2882.256	6	0.500	1	-10921639	118.526	118	109	139	11497	5.366	1.801	0.011	0.497
221	ID39153650	39153650	28	0.976	71.542	127.884	0	3362.632	7	0.500	1	-10921639	120.330	119	112	139	11672	5.777	0.484	0.008	0.323
222	ID39351114	39351114	28	1.201	74.915	122.969	0	3843.008	8	0.500	1	-10921639	119.268	118	111	146	11569	6.164	1.597	0.010	0.391
223	ID39356150	39356150	28	1.124	71.394	128.601	0	3843.008	8	0.500	1	-10921639	119.495	118	109	143	11591	6.005	0.483	0.008	0.326
224	ID39168604	39168604	28	1.280	71.184	128.373	0	4323.384	9	0.500	1	-10921639	119.732	119	109	143	11614	5.610	0.479	0.016	0.659
225	ID39148334	39148334	28	0.955	75.345	123.523	0	4323.384	9	0.500	1	-10921639	118.639	118	109	137	11508	5.315	0.488	0.012	0.530
226	ID39276424	39276424	29	0.944	112.639	211.339	0	0.000	0	0.500	1	-10921639	123.474	123	112	157	11977	6.758	1.900	-0.002	-0.057
227	ID39427326	39427326	29	0.904	113.223	211.028	0	480.376	1	0.500	1	-10921639	121.082	121	109	157	11745	6.538	1.900	0.008	0.302
228	ID39297210	39297210	29	0.976	113.482	210.879	0	960.752	2	0.500	1	-10921639	122.794	122	111	148	11911	6.240	1.900	0.008	0.310
229	ID39435875	39435875	29	0.998	113.384	210.828	0	1921.504	4	0.500	1	-10921639	121.649	120	109	151	11800	6.781	1.900	0.012	0.412
230	ID39264630	39264630	29	1.065	113.351	212.088	0	2401.880	5	0.500	1	-10921639	120.680	120	108	146	11706	5.982	0.703	0.012	0.484
231	ID39227405	39227405	29	1.000	112.058	210.616	0	3362.632	7	0.500	1	-10921639	121.629	121	113	137	11798	5.193	1.900	0.002	0.100
232	ID39403035	39403035	29	1.312	110.756	210.738	0	3843.008	8	0.500	1	-10921639	120.082	118	110	145	11648	6.855	0.493	0.014	0.486
233	ID39270156	39270156	29	0.946	111.039	210.433	0	4323.384	9	0.500	1	-10921639	121.010	120	109	139	11738	6.170	1.802	0.005	0.187
234	ID39283059	39283059	30	0.913	120.967	218.688	0	0.000	0	0.500	1	-10921639	120.794	120	108	140	11717	6.117	1.206	0.006	0.235
235	ID39428326	39428326	30	1.517	121.410	218.659	0	480.376	1	0.500	1	-10921639	122.969	123	112	138	11928	5.858	0.486	0.016	0.659
236	ID39304624	39304624	30	1.211	121.371	218.687	0	960.752	2	0.500	1	-10921639	120.948	120	112	140	11732	5.999	1.679	0.009	0.366
237	ID39304449	39304449	30	0.897	122.633	218.550	0	960.752	2	0.500	1	-10921639	119.474	119	107	133	11589	5.519	1.782	0.009	0.377
238	ID39405493	39405493	30	1.477	120.476	218.787	0	1441.128	3	0.500	1	-10921639	120.113	119	110	160	11651	7.330	0.485	0.012	0.391
239	ID39405132	39405132	30	1.305	124.603	218.216	0	1441.128	3	0.500	1	-10921639	120.887	120	110	138	11726	5.967	0.485	0.015	0.592
240	ID39436320	39436320	30	1.220	120.991	218.292	0	1921.504	4	0.500	1	-10921639	120.948	120	107	140	11732	5.957	1.833	0.012	0.483
241	ID39436391	39436391	30	0.918	126.176	218.709	0	1921.504	4	0.500	1	-10921639	118.670	118	108	145	11511	5.724	1.458	0.009	0.379
242	ID39280307	39280307	30	1.889	120.101	219.247	0	2401.880	5	0.500	1	-10921639	121.897	119	109	151	11824	8.123	0.704	0.017	0.506
243	ID39274085	39274085	30	1.838	126.388	217.805	0	2401.880	5	0.500	1	-10921639	121.165	120	107	155	11753	8.476	1.804	0.019	0.542
244	ID39349702	39349702	30	1.699	125.058	218.025	0	2882.256	6	0.500	1	-10921639	122.454	121	110	166	11878	9.060	0.491	0.020	0.531
245	ID39349799	39349799	30	1.788	121.817	218.305	0	2882.256	6	0.500	1	-10921639	121.433	120	109	145	11779	7.540	1.807	0.016	0.522
246	ID39232412	39232412	30	1.348	125.493	217.393	0	3362.632	7	0.500	1	-10921639	121.433	120	112	163	11779	7.699	0.484	0.005	0.154
247	ID39233385	39233385	30	1.389	122.063	218.416	0	3362.632	7	0.500	1	-10921639	121.000	120	110	147	11737	6.863	1.589	0.013	0.453
248	ID39403118	39403118	31	0.934	204.530	211.525	0	1441.128	3	0.500	1	-10921639	122.237	122	113	136	11857	5.733	1.398	0.006	0.241
249	ID39435035	39435035	31	1.024	203.863	213.626	0	1921.504	4	0.500	1	-10921639	121.227	120	111	138	11759	5.731	1.900	0.008	0.339
250	ID39270484	39270484	31	1.397	205.299	215.203	0	2401.880	5	0.500	1	-10921639	122.309	121	108	148	11864	7.243	0.480	0.011	0.383
251	ID39348688	39348688	31	1.537	204.808	216.534	0	2882.256	6	0.500	1	-10921639	122.598	122	109	142	11892	6.812	0.488	0.016	0.575
252	ID39237871	39237871	31	1.608	205.497	214.971	0	3362.632	7	0.500	1	-10921639	122.835	121	110	151	11915	7.656	0.486	0.015	0.482
253	ID39406464	39406464	31	1.592	204.317	214.866	0	3843.008	8	0.500	1	-10921639	123.474	123	111	142	11977	6.844	0.480	0.016	0.555
254	ID39278458	39278458	31	1.340	204.263	214.755	0	4323.384	9	0.500	1	-10921639	121.887	120	111	163	11823	7.215	0.708	0.012	0.400
255	ID39112426	39112426	32	1.399	97.441	39.594	0	960.752	2	0.500	1	-10921639	120.216	119	108	146	11661	6.844	0.471	0.020	0.705
256	ID39280523	39280523	32	1.232	97.161	38.772	0	1441.128	3	0.500	1	-10921639	122.072	121	110	144	11841	6.838	1.900	0.004	0.146
257	ID39357467	39357467	32	1.273	97.837	38.732	0	1921.504	4	0.500	1	-10921639	120.351	119	108	146	11674	6.622	1.900	0.012	0.441
258	ID39108990	39108990	32	1.071	97.215	38.281	0	2401.880	5	0.500	1	-10921639	120.701	120	110	148	11708	6.115	0.487	0.014	0.558
259	ID39192448	39192448	32	1.485	97.166	38.227	0	2882.256	6	0.500	1	-10921639	123.113	121	112	139	11942	6.400	0.489	0.016	0.593
260	ID39093317	39093317	32	1.038	97.287	38.415	0	3362.632	7	0.500	1	-10921639	121.010	120	109	144	11738	6.089	1.900	0.009	0.336
261	ID39293892	39293892	32	1.079	94.703	37.856	0	3843.008	8	0.500	1	-10921639	121.330	121	112	144	11769	5.834	0.482	0.013	0.528
262	ID39077651	39077651	32	0.951	97.079	38.533	0	4323.384	9	0.500	1	-10921639	120.814	120	109	155	11719	6.734	0.712	0.009	0.307
263	ID39417281	39417281	33	1.546	205.342	188.939	0	480.376	1	0.500	1	-10921639	124.433	123	111	173	12070	8.254	1.396	0.012	0.355
264	ID39277410	39277410	33	1.375	205.019	189.050	0	960.752	2	0.500	1	-10921639	124.825	125	111	151	12108	6.458	1.399	0.012	0.471
265	ID39389326	39389326	33	1.495	205.311	188.832	0	1441.128	3	0.500	1	-10921639	124.856	123	113	149	12111	7.518	0.487	0.014	0.451
266	ID39431962	39431962	33	1.130	205.618	188.669	0	1921.504	4	0.500	1	-10921639	125.691	125	114	152	12192	6.452	0.703	0.012	0.472
267	ID39243386	39243386	33	1.483	205.396	188.805	0	2401.880	5	0.500	1	-10921639	125.907	125	113	149	12213	7.524	1.398	0.012	0.410
268	ID39203701	39203701	33	1.396	205.256	189.029	0	3362.632	7	0.500	1	-10921639	125.247	124	113	148	12149	6.710	1.900	0.011	0.399
269	ID39392464	39392464	33	1.020	206.063	188.925	0	3843.008	8	0.500	1	-10921639	120.856	120	111	146	11723	6.481	1.796	0.009	0.347
270	ID39243919	39243919	33	0.881	204.904	189.095	0	4323.384	9	0.500	1	-10921639	120.773	120	109	141	11715	5.952	1.683	0.008	0.328
271	ID39245224	39245224	34	1.054	31.895	20.169	0	1441.128	3	0.500	1	-10921639	121.206	120	109	134	11757	5.485	1.809	0.005	0.220
272	ID39342876	39342876	34	1.234	31.505	20.060	0	1921.504	4	0.500	1	-10921639	121.680	121	109	142	11803	5.818	0.471	0.011	0.461
273	ID39096495	39096495	34	1.117	31.180	21.337	0	2401.880	5	0.500	1	-10921639	121.742	121	113	134	11809	5.716	1.798	0.011	0.455
274	ID39180836	39180836	34	1.192	31.778	20.942	0	2882.256	6	0.500	1	-10921639	122.649	122	110	136	11897	5.511	1.599	0.009	0.384
275	ID39264311	39264311	34	0.994	31.518	20.734	0	3843.008	8	0.500	1	-10921639	122.093	122	111	141	11843	5.790	1.031	0.005	0.201
276	ID39074968	39074968	34	1.059	31.174	20.921	0	4323.384	9	0.500	1	-10921639	120.505	120	112	137	11689	5.393	1.803	0.016	0.683
277	ID39198366	39198366	35	0.898	74.703	128.886	0	960.752	2	0.500	1	-10921639	121.505	121	110	137	11786	5.845	1.695	0.009	0.380
278	ID39356435	39356435	35	0.908	73.915	129.055	0	1441.128	3	0.500	1	-10921639	121.485	121	112	138	11784	5.122	1.811	0.011	0.534
279	ID39415583	39415583	35	1.347	74.479	129.186	0	1921.504	4	0.500	1	-10921639	121.763	121	110	144	11811	5.958	0.485	0.012	0.476
280	ID39184196	39184196	35	1.868	75.296	130.649	0	2401.880	5	0.500	1	-10921639	122.309	120	108	155	11864	8.706	0.482	0.016	0.454
281	ID39293811	39293811	35	1.221	75.434	130.866	0	2882.256	6	0.500	1	-10921639	121.443	120	111	150	11780	6.924	1.626	0.010	0.363
282	ID39158439	39158439	35	1.419	75.502	130.751	0	3362.632	7	0.500	1	-10921639	121.773	121	112	148	11812	6.401	1.683	0.013	0.495
283	ID39155797	39155797	36	1.678	190.782	70.174	0	0.000	0	0.500	1	-10921639	122.474	121	111	151	11880	7.269	0.708	0.018	0.601
284	ID39327615	39327615	36	2.265	191.272	70.171	0	480.376	1	0.500	1	-10921639	122.897	121	111	186	11921	10.064	0.485	0.021	0.508
285	ID39135176	39135176	36	1.520	191.070	70.061	0	960.752	2	0.500	1	-10921639	121.289	120	110	160	11765	7.392	0.478	0.016	0.527
286	ID39309270	39309270	36	1.033	190.935	70.366	0	1441.128	3	0.500	1	-10921639	121.144	121	111	146	11751	6.033	1.793	0.007	0.296
287	ID39381008	39381008	36	1.285	191.361	70.106	0	1921.504	4	0.500	1	-10921639	121.979	120	107	157	11832	7.862	1.819	0.012	0.356
288	ID39134394	39134394	36	1.478	191.516	70.385	0	2401.880	5	0.500	1	-10921639	122.381	121	109	166	11871	8.768	0.485	0.012	0.333
289	ID39231393	39231393	36	1.261	191.974	70.704	0	2882.256	6	0.500	1	-10921639	121.495	121	107	145	11785	6.178	1.900	0.012	0.450
290	ID39105907	39105907	36	1.487	190.977	69.966	0	3362.632	7	0.500	1	-10921639	121.330	120	110	154	11769	8.157	1.900	0.018	0.522
291	ID39314353	39314353	36	0.942	191.418	70.815	0	3843.008	8	0.500	1	-10921639	119.701	120	111	134	11611	5.216	1.792	0.012	0.538
292	ID39247257	39247257	37	1.631	99.865	181.489	0	0.000	0	0.500	1	-10921639	125.278	124	111	156	12152	7.652	1.827	0.016	0.531
293	ID39416443	39416443	37	1.144	100.581	181.701	0	480.376	1	0.500	1	-10921639	124.052	123	112	142	12033	5.940	0.495	0.015	0.616
294	ID39258250	39258250	37	1.227	101.067	181.556	0	960.752	2	0.500	1	-10921639	123.742	122	112	142	12003	6.071	1.900	0.013	0.522
295	ID39387658	39387658	37	1.733	100.866	181.236	0	1441.128	3	0.500	1	-10921639	124.392	123	112	165	12066	8.268	1.900	0.016	0.462
296	ID39430418	39430418	37	1.780	100.644	182.467	0	1921.504	4	0.500	1	-10921639	124.124	122	113	171	12040	8.635	0.431	0.015	0.411
297	ID39233800	39233800	37	1.870	100.324	181.533	0	2401.880	5	0.500	1	-10921639	125.010	123	112	155	12126	8.736	0.474	0.013	0.361
298	ID39325687	39325687	37	1.715	100.514	182.454	0	2882.256	6	0.500	1	-10921639	123.474	123	111	150	11977	7.825	1.806	0.023	0.704
299	ID39206022	39206022	37	1.335	99.457	182.110	0	3362.632	7	0.500	1	-10921639	123.423	122	111	142	11972	5.831	1.804	0.014	0.569
300	ID39383734	39383734	37	1.085	100.467	180.726	0	3843.008	8	0.500	1	-10921639	122.082	121	110	146	11842	5.575	1.606	0.011	0.476
301	ID39223428	39223428	37	0.900	100.143	180.966	0	4323.384	9	0.500	1	-10921639	120.722	119	112	139	11710	5.182	1.900	0.005	0.236
302	ID39120569	39120569	38	1.746	35.376	18.496	0	0.000	0	0.500	1	-10921639	121.732	121	111	146	11808	7.430	0.491	0.018	0.579
303	ID39284902	39284902	38	1.985	35.398	18.900	0	480.376	1	0.500	1	-10921639	123.423	121	111	153	11972	8.566	1.811	0.023	0.650
304	ID39098923	39098923	38	1.544	34.666	18.838	0	960.752	2	0.500	1	-10921639	122.134	121	110	144	11847	7.138	1.900	0.017	0.569
305	ID39243689	39243689	38	1.897	34.499	17.813	0	1441.128	3	0.500	1	-10921639	122.186	120	107	157	11852	8.383	0.487	0.017	0.491
306	ID39341847	39341847	38	1.189	34.441	18.917	0	1921.504	4	0.500	1	-10921639	121.876	121	110	162	11822	7.564	1.818	0.019	0.597
307	ID39094220	39094220	38	1.482	34.584	19.028	0	2401.880	5	0.500	1	-10921639	122.237	121	112	150	11857	6.702	0.486	0.014	0.494
308	ID39181686	39181686	38	0.984	34.411	18.943	0	2882.256	6	0.500	1	-10921639	121.536	120	110	145	11789	6.298	1.842	0.013	0.488
309	ID39082241	39082241	38	1.062	34.364	19.003	0	3362.632	7	0.500	1	-10921639	121.072	121	112	142	11744	5.233	1.900	0.010	0.478
310	ID39272010	39272010	38	0.881	34.122	19.036	0	3843.008	8	0.500	1	-10921639	120.299	120	108	136	11669	5.339	1.391	0.005	0.217
311	ID39074739	39074739	38	1.110	33.893	19.340	0	4323.384	9	0.500	1	-10921639	120.722	120	111	136	11710	5.311	1.900	0.007	0.331
312	ID39120190	39120190	39	1.993	86.416	17.809	0	0.000	0	0.500	1	-10921639	124.227	123	112	154	12050	8.553	0.489	0.018	0.515
313	ID39291811	39291811	39	2.356	86.625	16.893	0	480.376	1	0.500	1	-10921639	124.691	122	113	157	12095	9.290	0.478	0.022	0.566
314	ID39097623	39097623	39	2.195	86.819	16.815	0	960.752	2	0.500	1	-10921639	124.608	122	110	159	12087	9.032	0.483	0.016	0.443
315	ID39255087	39255087	39	2.020	86.535	16.362	0	1441.128	3	0.500	1	-10921639	124.392	123	111	153	12066	8.266	1.900	0.024	0.691
316	ID39341064	39341064	39	1.563	87.315	16.555	0	1921.504	4	0.500	1	-10921639	123.093	122	112	150	11940	6.770	1.688	0.014	0.515
317	ID39104025	39104025	39	1.467	87.157	16.509	0	2401.880	5	0.500	1	-10921639	123.454	122	112	143	11975	6.570	0.706	0.015	0.547
318	ID39170892	39170892	39	1.298	86.930	16.764	0	2882.256	6	0.500	1	-10921639	123.299	123	110	138	11960	5.962	1.900	0.014	0.577
319	ID39083805	39083805	39	1.397	87.100	16.723	0	3362.632	7	0.500	1	-10921639	122.072	121	109	145	11841	6.634	1.900	0.015	0.528
320	ID39261859	39261859	39	1.407	87.201	17.382	0	3843.008	8	0.500	1	-10921639	123.010	122	113	141	11932	5.691	0.707	0.013	0.567
321	ID39074112	39074112	39	1.473	87.238	17.145	0	4323.384	9	0.500	1	-10921639	122.649	121	112	143	11897	6.744	0.700	0.015	0.536
322	ID39258226	39258226	40	0.876	162.210	189.977	0	0.000	0	0.500	1	-10921639	121.598	120	112	142	11795	5.513	1.680	0.011	0.484
323	ID39418126	39418126	40	1.381	163.419	189.807	0	480.376	1	0.500	1	-10921639	122.619	122	110	140	11894	6.427	1.631	0.018	0.669
324	ID39273601	39273601	40	1.048	163.097	189.783	0	960.752	2	0.500	1	-10921639	121.072	120	112	140	11744	5.534	1.900	0.008	0.355
325	ID39433482	39433482	40	1.196	163.075	190.085	0	1921.504	4	0.500	1	-10921639	121.567	121	111	146	11792	6.636	1.701	0.008	0.274
326	ID39250858	39250858	40	1.247	162.944	190.213	0	2401.880	5	0.500	1	-10921639	121.845	121	108	141	11819	6.194	0.488	0.017	0.644
327	ID39329139	39329139	40	1.216	162.753	190.527	0	2882.256	6	0.500	1	-10921639	121.897	121	112	137	11824	5.691	1.830	0.011	0.459
328	ID39212707	39212707	40	0.956	162.842	190.566	0	3362.632	7	0.500	1	-10921639	121.216	121	112	135	11758	4.899	1.900	0.009	0.445
329	ID39386726	39386726	40	0.980	162.741	190.762	0	3843.008	8	0.500	1	-10921639	121.144	120	112	140	11751	5.620	0.700	0.014	0.591
330	ID39131670	39131670	41	1.192	93.023	37.111	0	0.000	0	0.500	1	-10921639	124.278	123	114	150	12055	6.286	1.604	0.011	0.425
331	ID39306977	39306977	41	1.483	94.506	36.506	0	480.376	1	0.500	1	-10921639	123.753	123	110	143	12004	6.413	0.488	0.016	0.596
332	ID39106667	39106667	41	1.523	94.731	36.065	0	960.752	2	0.500	1	-10921639	123.969	123	112	141	12025	6.272	0.487	0.020	0.781
333	ID39275961	39275961	41	1.508	94.562	36.083	0	1441.128	3	0.500	1	-10921639	123.897	124	112	153	12018	6.726	0.487	0.015	0.553
334	ID39362822	39362822	41	1.041	94.826	35.999	0	1921.504	4	0.500	1	-10921639	122.320	122	112	142	11865	5.237	0.707	0.005	0.238
335	ID39107065	39107065	41	0.877	94.252	36.814	0	2401.880	5	0.500	1	-10921639	120.794	120	110	136	11717	4.969	1.582	0.010	0.469
336	ID39198124	39198124	41	1.122	94.570	36.648	0	2882.256	6	0.500	1	-10921639	122.505	122	114	146	11883	5.559	1.796	0.013	0.573
337	ID39186065	39186065	42	1.035	197.352	107.059	0	0.000	0	0.500	1	-10921639	119.361	118	108	141	11578	6.356	1.785	0.013	0.467
338	ID39360555	39360555	42	1.099	197.607	106.852	0	480.376	1	0.500	1	-10921639	119.794	119	109	137	11620	5.813	1.767	0.009	0.370
339	ID39174365	39174365	42	1.230	197.897	107.101	0	960.752	2	0.500	1	-10921639	119.732	119	110	158	11614	6.304	1.900	0.013	0.473
340	ID39336419	39336419	42	1.092	197.748	106.753	0	1441.128	3	0.500	1	-10921639	119.794	118	109	143	11620	6.484	1.633	0.005	0.183
341	ID39408647	39408647	42	1.081	200.629	104.100	0	1921.504	4	0.500	1	-10921639	121.691	120	111	147	11804	6.537	1.738	0.007	0.264
342	ID39159435	39159435	42	1.334	200.967	104.257	0	2401.880	5	0.500	1	-10921639	122.320	122	110	142	11865	6.539	1.900	0.010	0.382
343	ID39267172	39267172	42	1.004	200.903	104.301	0	2882.256	6	0.500	1	-10921639	121.814	121	111	138	11816	5.763	0.710	0.009	0.358
344	ID39150440	39150440	43	1.848	45.587	67.477	0	0.000	0	0.500	1	-10921639	122.309	120	109	147	11864	7.909	0.487	0.018	0.545
345	ID39324434	39324434	43	1.849	45.493	66.677	0	480.376	1	0.500	1	-10921639	122.443	121	112	149	11877	7.564	0.480	0.014	0.455
346	ID39137829	39137829	43	1.701	45.789	67.074	0	960.752	2	0.500	1	-10921639	121.753	120	109	143	11810	6.776	0.469	0.017	0.596
347	ID39306710	39306710	43	1.797	46.997	67.171	0	1441.128	3	0.500	1	-10921639	122.515	120	112	154	11884	8.303	1.900	0.018	0.509
348	ID39377464	39377464	43	1.495	47.420	67.533	0	1921.504	4	0.500	1	-10921639	121.412	120	111	165	11777	7.304	0.490	0.012	0.384
349	ID39139028	39139028	43	1.459	46.461	67.691	0	2401.880	5	0.500	1	-10921639	121.814	121	109	146	11816	7.262	0.465	0.010	0.324
350	ID39228122	39228122	43	1.143	45.553	67.906	0	2882.256	6	0.500	1	-10921639	121.052	120	111	139	11742	5.533	0.481	0.014	0.584
351	ID39108976	39108976	43	0.924	46.544	68.216	0	3362.632	7	0.500	1	-10921639	120.052	119	112	139	11645	5.085	0.705	0.010	0.474
352	ID39315659	39315659	43	1.314	45.899	68.185	0	3843.008	8	0.500	1	-10921639	121.619	121	110	148	11797	6.327	0.714	0.008	0.301
353	ID39089282	39089282	43	0.954	45.506	68.062	0	4323.384	9	0.500	1	-10921639	120.794	121	110	138	11717	5.060	0.710	0.009	0.432
354	ID39137501	39137501	44	0.913	110.937	44.281	0	0.000	0	0.500	1	-10921639	121.505	120	111	150	11786	5.616	1.804	0.010	0.440
355	ID39313772	39313772	44	1.908	110.488	46.160	0	480.376	1	0.500	1	-10921639	123.639	121	113	151	11993	8.092	0.485	0.020	0.595
356	ID39117683	39117683	44	2.000	109.611	46.442	0	960.752	2	0.500	1	-10921639	123.196	122	112	159	11950	8.413	0.488	0.021	0.596
357	ID39292441	39292441	44	1.746	110.044	45.735	0	1441.128	3	0.500	1	-10921639	123.464	121	109	148	11976	7.782	0.490	0.022	0.688
358	ID39370042	39370042	44	1.264	111.002	45.972	0	1921.504	4	0.500	1	-10921639	121.577	121	110	142	11793	6.290	0.485	0.015	0.574
359	ID39115213	39115213	44	1.319	110.752	45.475	0	2401.880	5	0.500	1	-10921639	121.278	121	108	138	11764	5.959	0.489	0.012	0.502
360	ID39207006	39207006	44	1.090	110.425	46.090	0	2882.256	6	0.500	1	-10921639	121.340	121	112	140	11770	5.719	1.776	0.014	0.590
361	ID39295735	39295735	44	1.217	110.353	44.952	0	3843.008	8	0.500	1	-10921639	121.773	121	111	136	11812	5.450	1.610	0.010	0.456
362	ID39078497	39078497	44	0.939	110.275	46.103	0	4323.384	9	0.500	1	-10921639	121.144	121	110	135	11751	5.286	1.728	0.013	0.608
363	ID39269446	39269446	45	1.479	132.436	208.364	0	0.000	0	0.500	1	-10921639	122.887	122	109	145	11920	7.364	1.797	0.019	0.610
364	ID39425652	39425652	45	1.121	133.615	209.362	0	480.376	1	0.500	1	-10921639	122.495	122	111	139	11882	5.354	0.493	0.008	0.353
365	ID39293345	39293345	45	1.082	133.730	209.259	0	960.752	2	0.500	1	-10921639	123.041	122	112	146	11935	5.865	1.757	0.009	0.366
366	ID39399860	39399860	45	1.171	133.571	208.924	0	1441.128	3	0.500	1	-10921639	121.753	120	111	144	11810	6.398	1.900	0.015	0.553
367	ID39435581	39435581	45	0.883	133.568	209.121	0	1921.504	4	0.500	1	-10921639	121.959	122	111	140	11830	5.366	1.603	0.011	0.485
368	ID39260092	39260092	45	1.042	133.644	209.244	0	2401.880	5	0.500	1	-10921639	122.381	121	113	137	11871	5.007	1.900	0.012	0.561
369	ID39234389	39234389	45	1.333	134.085	209.715	0	3362.632	7	0.500	1	-10921639	123.691	124	113	143	11998	6.075	0.488	0.015	0.584
370	ID39402884	39402884	45	0.930	133.154	210.443	0	3843.008	8	0.500	1	-10921639	121.722	120	112	140	11807	5.479	0.717	0.014	0.621
371	ID39270185	39270185	45	1.038	133.198	210.373	0	4323.384	9	0.500	1	-10921639	122.485	121	112	153	11881	6.605	1.723	0.012	0.436
372	ID39150892	39150892	46	2.038	77.329	68.303	0	0.000	0	0.500	1	-10921639	125.825	124	110	150	12205	8.226	0.477	0.026	0.765
373	ID39331187	39331187	46	1.791	77.355	68.744	0	480.376	1	0.500	1	-10921639	124.062	123	111	144	12034	6.980	0.490	0.016	0.567
374	ID39136463	39136463	46	2.087	77.468	68.528	0	960.752	2	0.500	1	-10921639	126.423	126	112	150	12263	7.419	0.489	0.016	0.538
375	ID39309878	39309878	46	1.536	78.154	68.202	0	1441.128	3	0.500	1	-10921639	126.505	126	115	152	12271	6.596	0.474	0.014	0.515
376	ID39377983	39377983	46	1.585	77.395	68.524	0	1921.504	4	0.500	1	-10921639	124.340	123	114	144	12061	6.522	1.800	0.017	0.649
377	ID39133299	39133299	46	1.744	77.810	68.702	0	2401.880	5	0.500	1	-10921639	125.773	125	114	144	12200	6.841	0.493	0.023	0.833
378	ID39228310	39228310	46	1.255	77.351	68.141	0	2882.256	6	0.500	1	-10921639	123.711	123	112	146	12000	6.473	1.599	0.016	0.606
379	ID39228969	39228969	46	1.187	77.531	68.857	0	2882.256	6	0.500	1	-10921639	122.701	121	113	151	11902	6.685	1.777	0.012	0.431
380	ID39109041	39109041	46	1.080	77.593	67.997	0	3362.632	7	0.500	1	-10921639	122.567	122	114	143	11889	5.791	1.817	0.012	0.505
381	ID39109625	39109625	46	0.895	77.837	68.897	0	3362.632	7	0.500	1	-10921639	121.825	121	110	142	11817	6.521	1.783	0.006	0.236
382	ID39313971	39313971	46	1.261	78.444	70.559	0	3843.008	8	0.500	1	-10921639	121.021	120	109	142	11739	6.293	0.485	0.016	0.599
383	ID39309799	39309799	46	1.313	77.349	67.512	0	3843.008	8	0.500	1	-10921639	120.423	119	109	166	11681	7.959	0.336	0.013	0.385
384	ID39089219	39089219	46	1.364	76.311	67.766	0	4323.384	9	0.500	1	-10921639	120.144	119	111	139	11654	5.897	0.487	0.017	0.679
385	ID39098602	39098602	46	1.184	79.263	71.403	0	4323.384	9	0.500	1	-10921639	120.361	119	110	148	11675	6.835	1.848	0.007	0.236
386	ID39244358	39244358	47	1.503	145.127	166.918	0	0.000	0	0.500	1	-10921639	121.845	120	109	152	11819	7.424	0.468	0.015	0.470
387	ID39410632	39410632	47	1.442	145.978	166.968	0	480.376	1	0.500	1	-10921639	121.206	119	110	141	11757	6.762	0.490	0.017	0.596
388	ID39246418	39246418	47	1.582	147.305	168.892	0	960.752	2	0.500	1	-10921639	122.990	122	108	142	11930	6.304	0.491	0.017	0.667
389	ID39376060	39376060	47	1.756	147.429	169.477	0	1441.128	3	0.500	1	-10921639	120.732	118	109	146	11711	8.143	1.807	0.017	0.507
390	ID39426611	39426611	47	1.794	146.673	168.998	0	1921.504	4	0.500	1	-10921639	122.371	120	111	154	11870	7.817	1.900	0.014	0.431
391	ID39241889	39241889	47	1.857	146.677	168.689	0	2401.880	5	0.500	1	-10921639	123.701	122	110	157	11999	7.885	1.900	0.016	0.506
392	ID39313257	39313257	47	1.745	145.061	169.181	0	2882.256	6	0.500	1	-10921639	122.124	120	110	172	11846	9.031	1.695	0.021	0.548
393	ID39193298	39193298	47	1.321	146.217	168.345	0	3362.632	7	0.500	1	-10921639	123.381	123	110	138	11968	5.934	1.689	0.012	0.504
394	ID39377407	39377407	47	1.486	146.304	168.766	0	3843.008	8	0.500	1	-10921639	122.660	122	109	147	11898	6.922	0.473	0.012	0.405
395	ID39213262	39213262	47	1.185	145.631	169.840	0	4323.384	9	0.500	1	-10921639	121.866	122	110	142	11821	6.074	0.478	0.011	0.419
396	ID39129638	39129638	48	1.351	88.870	55.900	0	960.752	2	0.500	1	-10921639	122.567	122	111	142	11889	6.146	0.487	0.012	0.476
397	ID39298290	39298290	48	0.942	88.314	56.646	0	1441.128	3	0.500	1	-10921639	122.990	123	109	141	11930	5.574	1.399	0.003	0.126
398	ID39369523	39369523	48	0.892	88.990	55.976	0	1921.504	4	0.500	1	-10921639	121.320	121	110	150	11768	6.665	1.720	0.006	0.219
399	ID39125431	39125431	48	1.126	89.341	56.286	0	2401.880	5	0.500	1	-10921639	121.990	121	111	144	11833	6.623	0.314	0.008	0.300
400	ID39215232	39215232	48	1.293	88.807	56.444	0	2882.256	6	0.500	1	-10921639	122.990	122	109	140	11930	6.388	0.490	0.013	0.507
401	ID39125864	39125864	49	1.327	133.988	26.513	0	0.000	0	0.500	1	-10921639	124.351	123	114	157	12062	7.785	1.900	0.013	0.412
402	ID39294380	39294380	49	1.077	134.640	26.337	0	480.376	1	0.500	1	-10921639	122.773	122	109	153	11909	6.891	1.778	0.010	0.340
403	ID39102072	39102072	49	1.396	133.851	25.529	0	960.752	2	0.500	1	-10921639	122.763	121	112	152	11908	6.855	1.594	0.016	0.549
404	ID39257378	39257378	49	2.000	134.236	25.595	0	1441.128	3	0.500	1	-10921639	123.351	121	111	158	11965	8.814	0.484	0.017	0.457
405	ID39353142	39353142	49	1.597	133.448	25.358	0	1921.504	4	0.500	1	-10921639	122.928	121	110	147	11924	7.517	1.798	0.014	0.456
406	ID39100138	39100138	49	1.892	134.466	25.009	0	2401.880	5	0.500	1	-10921639	123.536	121	114	155	11983	8.000	0.482	0.017	0.522
407	ID39188304	39188304	49	1.821	134.454	25.913	0	2882.256	6	0.500	1	-10921639	124.567	123	112	158	12083	8.603	0.490	0.017	0.485
408	ID39082863	39082863	49	1.194	134.600	25.835	0	3362.632	7	0.500	1	-10921639	121.711	122	109	139	11806	5.852	1.390	0.015	0.598
409	ID39281221	39281221	49	1.342	134.862	25.248	0	3843.008	8	0.500	1	-10921639	121.928	121	110	142	11827	6.417	0.487	0.012	0.434
410	ID39406740	39406740	50	0.947	22.633	161.520	0	480.376	1	0.500	1	-10921639	119.938	119	109	146	11634	5.627	1.900	0.003	0.116
411	ID39234368	39234368	50	0.951	23.566	160.678	0	960.752	2	0.500	1	-10921639	119.536	118	109	140	11595	5.774	1.900	0.010	0.390
412	ID39369843	39369843	50	1.071	21.259	157.927	0	1441.128	3	0.500	1	-10921639	121.216	121	110	149	11758	6.187	0.493	0.010	0.381
413	ID39426102	39426102	50	1.521	20.677	157.805	0	1921.504	4	0.500	1	-10921639	122.423	121	114	142	11875	6.498	1.799	0.013	0.494
414	ID39207301	39207301	50	0.971	20.750	158.737	0	2401.880	5	0.500	1	-10921639	120.546	119	110	149	11693	6.235	0.462	0.007	0.259
415	ID39309510	39309510	50	0.975	20.469	158.922	0	2882.256	6	0.500	1	-10921639	120.289	119	111	139	11668	5.571	1.900	0.008	0.353
416	ID39183289	39183289	50	0.977	20.712	159.164	0	3362.632	7	0.500	1	-10921639	120.887	120	111	135	11726	5.190	0.709	0.006	0.288
417	ID39370098	39370098	50	0.983	20.366	159.442	0	3843.008	8	0.500	1	-10921639	120.433	120	110	135	11682	5.321	0.478	0.006	0.276
418	ID39205505	39205505	50	1.194	20.378	159.246	0	4323.384	9	0.500	1	-10921639	121.485	121	112	148	11784	5.972	0.322	0.010	0.404
419	ID39222784	39222784	51	1.557	42.207	153.939	0	960.752	2	0.500	1	-10921639	122.711	121	112	141	11903	6.633	1.900	0.019	0.694
420	ID39366397	39366397	51	0.916	42.260	153.908	0	1441.128	3	0.500	1	-10921639	120.680	120	110	138	11706	5.929	1.384	0.007	0.283
421	ID39423785	39423785	51	1.277	43.009	153.623	0	1921.504	4	0.500	1	-10921639	121.753	121	109	144	11810	6.354	0.484	0.014	0.523
422	ID39203264	39203264	51	1.474	42.638	154.185	0	2401.880	5	0.500	1	-10921639	121.814	121	110	152	11816	7.301	1.788	0.019	0.620
423	ID39308585	39308585	51	1.459	42.323	154.245	0	2882.256	6	0.500	1	-10921639	121.515	120	110	151	11787	7.252	1.715	0.014	0.465
424	ID39177442	39177442	51	1.212	41.274	152.962	0	3362.632	7	0.500	1	-10921639	120.196	119	109	136	11659	5.794	0.489	0.010	0.391
425	ID39368337	39368337	51	1.402	41.624	153.234	0	3843.008	8	0.500	1	-10921639	120.691	119	108	141	11707	7.036	1.781	0.020	0.662
426	ID39196785	39196785	51	1.061	40.905	153.851	0	4323.384	9	0.500	1	-10921639	120.309	120	111	139	11670	5.094	1.395	0.006	0.299
427	ID39374123	39374123	52	1.231	95.776	160.097	0	1441.128	3	0.500	1	-10921639	123.103	123	113	150	11941	5.936	1.598	0.013	0.535
428	ID39425322	39425322	52	1.361	96.381	160.174	0	1921.504	4	0.500	1	-10921639	122.567	121	112	143	11889	6.268	0.704	0.011	0.421
429	ID39212096	39212096	52	1.293	96.316	160.913	0	2401.880	5	0.500	1	-10921639	122.093	121	111	144	11843	6.007	1.207	0.008	0.336
430	ID39310495	39310495	52	1.308	96.149	162.549	0	2882.256	6	0.500	1	-10921639	121.505	120	111	146	11786	6.921	0.488	0.016	0.563
431	ID39180942	39180942	52	1.638	96.947	162.884	0	3362.632	7	0.500	1	-10921639	123.247	122	112	142	11955	7.201	0.483	0.019	0.630
432	ID39376156	39376156	52	1.277	97.307	163.466	0	3843.008	8	0.500	1	-10921639	121.103	121	110	135	11747	5.669	0.488	0.013	0.528
433	ID39282138	39282138	53	1.560	177.965	214.385	0	0.000	0	0.500	1	-10921639	127.629	126	115	174	12380	8.631	0.491	0.007	0.214
434	ID39425872	39425872	53	1.834	179.408	213.101	0	480.376	1	0.500	1	-10921639	125.773	125	112	153	12200	8.008	1.900	0.016	0.507
435	ID39299619	39299619	53	1.786	178.785	215.574	0	960.752	2	0.500	1	-10921639	124.918	124	114	151	12117	7.792	0.493	0.016	0.507
436	ID39402222	39402222	53	1.949	180.106	214.555	0	1441.128	3	0.500	1	-10921639	125.969	126	107	149	12219	7.777	0.490	0.021	0.666
437	ID39435311	39435311	53	1.905	179.469	215.209	0	1921.504	4	0.500	1	-10921639	126.495	124	111	164	12270	8.895	0.471	0.018	0.489
438	ID39267415	39267415	53	2.173	179.541	214.399	0	2401.880	5	0.500	1	-10921639	128.010	126	114	163	12417	8.416	1.398	0.026	0.774
439	ID39351049	39351049	53	1.495	177.585	215.162	0	2882.256	6	0.500	1	-10921639	124.371	124	112	142	12064	6.870	1.900	0.020	0.714
440	ID39238196	39238196	53	0.970	178.137	215.255	0	3362.632	7	0.500	1	-10921639	124.309	123	113	137	12058	5.318	1.590	0.010	0.448
441	ID39406969	39406969	53	1.521	179.047	215.693	0	3843.008	8	0.500	1	-10921639	124.485	123	111	144	12075	7.083	1.600	0.014	0.497
442	ID39390476	39390476	54	1.482	73.572	194.201	0	1441.128	3	0.500	1	-10921639	120.165	118	110	161	11656	8.066	1.900	0.016	0.459
443	ID39432238	39432238	54	1.531	74.091	193.629	0	1921.504	4	0.500	1	-10921639	120.814	120	111	142	11719	6.721	0.486	0.015	0.520
444	ID39248064	39248064	54	1.023	73.545	193.841	0	2401.880	5	0.500	1	-10921639	120.186	119	111	138	11658	5.424	0.487	0.013	0.581
445	ID39180403	39180403	55	1.328	145.335	100.397	0	0.000	0	0.500	1	-10921639	120.784	120	109	138	11716	6.004	1.900	0.015	0.612
446	ID39356914	39356914	55	1.197	145.441	100.646	0	480.376	1	0.500	1	-10921639	120.732	119	110	142	11711	6.003	1.900	0.011	0.449
447	ID39167462	39167462	55	0.958	145.807	100.661	0	960.752	2	0.500	1	-10921639	120.175	120	110	136	11657	5.690	0.717	0.014	0.583
448	ID39332612	39332612	55	0.934	141.948	100.301	0	1441.128	3	0.500	1	-10921639	119.814	119	110	135	11622	5.561	0.490	0.010	0.429
449	ID39402787	39402787	55	1.053	142.193	100.092	0	1921.504	4	0.500	1	-10921639	119.371	118	108	149	11579	6.534	1.900	0.011	0.396
450	ID39158657	39158657	55	0.892	142.271	103.269	0	2401.880	5	0.500	1	-10921639	119.340	119	110	146	11576	6.024	1.584	0.009	0.359
451	ID39264433	39264433	55	1.035	142.020	101.794	0	2882.256	6	0.500	1	-10921639	118.959	119	109	136	11539	5.471	0.705	0.012	0.515
452	ID39134322	39134322	55	1.626	140.032	100.131	0	3362.632	7	0.500	1	-10921639	120.258	118	109	147	11665	7.495	0.485	0.014	0.444
453	ID39337542	39337542	55	1.131	140.222	99.817	0	3843.008	8	0.500	1	-10921639	118.825	118	107	134	11526	5.489	0.489	0.013	0.547
454	ID39129269	39129269	55	1.009	140.275	101.083	0	4323.384	9	0.500	1	-10921639	119.320	118	109	150	11574	6.522	0.482	0.013	0.460
455	ID39264582	39264582	56	1.942	59.583	201.162	0	0.000	0	0.500	1	-10921639	124.093	122	110	152	12037	8.232	0.490	0.014	0.406
456	ID39420944	39420944	56	2.020	61.418	199.337	0	480.376	1	0.500	1	-10921639	123.526	121	112	153	11982	8.490	0.479	0.020	0.575
457	ID39285887	39285887	56	1.785	61.383	198.376	0	960.752	2	0.500	1	-10921639	122.897	121	112	153	11921	8.005	1.811	0.019	0.558
458	ID39393678	39393678	56	1.744	60.735	198.281	0	1441.128	3	0.500	1	-10921639	122.454	121	113	152	11878	7.658	1.900	0.019	0.586
459	ID39434786	39434786	56	1.663	61.573	199.496	0	1921.504	4	0.500	1	-10921639	122.856	121	112	159	11917	7.825	1.900	0.017	0.520
460	ID39253490	39253490	56	1.221	61.679	199.322	0	2401.880	5	0.500	1	-10921639	122.577	122	113	140	11890	5.806	0.488	0.010	0.419
461	ID39339755	39339755	56	1.570	61.574	199.777	0	2882.256	6	0.500	1	-10921639	122.732	121	112	147	11905	6.806	1.816	0.016	0.569
462	ID39215346	39215346	56	1.220	61.943	199.701	0	3362.632	7	0.500	1	-10921639	122.588	122	111	136	11891	5.390	1.900	0.017	0.752
463	ID39397732	39397732	56	1.608	61.187	200.415	0	3843.008	8	0.500	1	-10921639	124.247	123	113	157	12052	7.101	0.485	0.015	0.518
464	ID39252902	39252902	56	1.086	60.933	200.641	0	4323.384	9	0.500	1	-10921639	123.485	123	113	144	11978	6.183	1.779	0.005	0.205
465	ID39204851	39204851	57	1.078	152.232	124.933	0	0.000	0	0.500	1	-10921639	120.876	120	112	141	11725	5.909	1.401	0.006	0.245
466	ID39374686	39374686	57	1.208	152.687	124.551	0	480.376	1	0.500	1	-10921639	119.495	118	108	144	11591	6.770	1.676	0.009	0.316
467	ID39194400	39194400	57	1.148	151.995	125.202	0	960.752	2	0.500	1	-10921639	119.237	119	108	133	11566	5.887	1.900	0.010	0.386
468	ID39354298	39354298	57	1.239	150.845	126.909	0	1441.128	3	0.500	1	-10921639	118.639	117	109	141	11508	6.947	1.900	0.015	0.498
469	ID39414565	39414565	57	1.400	150.634	127.281	0	1921.504	4	0.500	1	-10921639	119.072	117	108	147	11550	7.680	1.900	0.018	0.558
470	ID39179064	39179064	57	1.082	150.393	126.371	0	2401.880	5	0.500	1	-10921639	118.660	118	109	137	11510	5.710	0.705	0.015	0.616
471	ID39286038	39286038	57	1.385	151.000	125.822	0	2882.256	6	0.500	1	-10921639	120.175	119	108	145	11657	6.775	1.814	0.011	0.379
472	ID39157396	39157396	57	1.095	150.961	126.154	0	3362.632	7	0.500	1	-10921639	119.010	119	109	145	11544	6.204	0.708	0.006	0.232
473	ID39352628	39352628	57	0.978	150.822	127.062	0	3843.008	8	0.500	1	-10921639	118.155	117	107	160	11461	6.507	1.819	0.009	0.331
474	ID39156760	39156760	57	0.928	151.091	127.262	0	4323.384	9	0.500	1	-10921639	118.227	117	109	131	11468	5.067	1.900	0.005	0.228
475	ID39415335	39415335	58	0.973	154.448	128.232	0	1921.504	4	0.500	1	-10921639	120.412	120	108	132	11680	4.934	1.406	0.014	0.677
476	ID39194317	39194317	58	1.430	154.349	128.569	0	2401.880	5	0.500	1	-10921639	121.320	121	108	139	11768	6.539	1.791	0.016	0.568
477	ID39293154	39293154	58	1.006	154.495	128.810	0	2882.256	6	0.500	1	-10921639	119.144	118	109	144	11557	6.180	0.492	0.005	0.179
478	ID39252321	39252321	59	2.238	103.215	187.652	0	0.000	0	0.500	1	-10921639	136.412	134	120	177	13232	9.810	1.900	0.020	0.548
479	ID39418910	39418910	59	1.002	104.289	187.229	0	480.376	1	0.500	1	-10921639	132.918	132	123	150	12893	6.327	1.588	0.008	0.326
480	ID39272527	39272527	59	2.414	104.068	187.478	0	960.752	2	0.500	1	-10921639	135.320	133	120	164	13126	9.371	0.483	0.019	0.533
481	ID39388500	39388500	59	1.988	103.890	187.485	0	1441.128	3	0.500	1	-10921639	134.680	134	120	159	13064	8.954	0.486	0.015	0.439
482	ID39431719	39431719	59	3.328	104.273	187.289	0	1921.504	4	0.500	1	-10921639	139.206	136	120	171	13503	11.855	0.490	0.027	0.626
483	ID39239161	39239161	59	3.095	104.289	187.311	0	2401.880	5	0.500	1	-10921639	140.062	138	121	166	13586	9.950	0.713	0.025	0.685
484	ID39331948	39331948	59	1.727	103.917	187.676	0	2882.256	6	0.500	1	-10921639	132.165	131	117	155	12820	7.963	0.703	0.018	0.572
485	ID39208300	39208300	59	1.271	103.986	187.646	0	3362.632	7	0.500	1	-10921639	131.134	130	120	150	12720	6.703	0.704	0.008	0.329
486	ID39390774	39390774	59	1.603	103.780	187.814	0	3843.008	8	0.500	1	-10921639	130.887	130	120	151	12696	7.286	1.710	0.015	0.538
487	ID39242023	39242023	59	1.661	103.799	187.679	0	4323.384	9	0.500	1	-10921639	133.392	132	120	164	12939	8.241	1.900	0.015	0.464
488	ID39129705	39129705	60	1.019	96.247	35.220	0	0.000	0	0.500	1	-10921639	120.928	120	109	150	11730	6.222	0.495	0.008	0.316
489	ID39301553	39301553	60	1.398	96.067	34.967	0	480.376	1	0.500	1	-10921639	121.124	119	109	144	11749	7.005	1.900	0.018	0.614
490	ID39109705	39109705	60	1.565	96.740	33.548	0	960.752	2	0.500	1	-10921639	122.701	121	111	144	11902	6.870	0.484	0.016	0.549
491	ID39267273	39267273	60	1.413	96.334	34.018	0	1441.128	3	0.500	1	-10921639	122.247	120	111	141	11858	6.320	0.708	0.016	0.621
492	ID39361754	39361754	60	1.637	96.216	34.596	0	1921.504	4	0.500	1	-10921639	123.804	123	113	159	12009	7.368	1.809	0.015	0.482
493	ID39105600	39105600	60	1.200	95.994	34.625	0	2401.880	5	0.500	1	-10921639	122.711	123	113	137	11903	4.895	0.710	0.010	0.503
494	ID39195375	39195375	60	0.881	96.228	35.290	0	2882.256	6	0.500	1	-10921639	122.309	122	111	138	11864	4.895	1.801	0.010	0.515
495	ID39284134	39284134	60	1.090	96.322	35.738	0	3843.008	8	0.500	1	-10921639	122.144	122	111	146	11848	5.612	1.610	0.009	0.401
496	ID39077724	39077724	60	0.994	96.242	35.982	0	4323.384	9	0.500	1	-10921639	122.062	122	112	134	11840	5.027	1.590	0.008	0.382
497	ID39197221	39197221	61	1.929	66.352	123.888	0	0.000	0	0.500	1	-10921639	126.907	126	114	150	12310	7.416	1.900	0.020	0.671
498	ID39374025	39374025	61	1.274	66.804	123.883	0	480.376	1	0.500	1	-10921639	124.814	124	115	143	12107	5.533	1.825	0.015	0.677
499	ID39348919	39348919	61	1.437	66.948	123.387	0	1441.128	3	0.500	1	-10921639	126.340	125	111	149	12255	6.668	0.483	0.017	0.624
500	ID39412955	39412955	61	1.641	66.849	123.405	0	1921.504	4	0.500	1	-10921639	126.381	126	114	150	12259	7.042	1.808	0.014	0.485
501	ID39175584	39175584	61	0.881	66.741	123.313	0	2401.880	5	0.500	1	-10921639	124.835	125	112	144	12109	5.764	1.675	0.007	0.306
502	ID39177708	39177708	61	0.940	66.233	123.544	0	2401.880	5	0.500	1	-10921639	123.990	124	112	141	12027	5.794	1.900	0.012	0.497
503	ID39284736	39284736	61	1.494	65.943	123.654	0	2882.256	6	0.500	1	-10921639	124.351	124	109	153	12062	7.156	0.470	0.019	0.638
504	ID39151440	39151440	61	1.407	66.375	123.435	0	3362.632	7	0.500	1	-10921639	124.247	123	110	144	12052	7.233	1.396	0.016	0.533
505	ID39348158	39348158	61	1.460	65.867	123.675	0	3843.008	8	0.500	1	-10921639	124.124	124	112	145	12040	6.635	1.782	0.017	0.627
506	ID39147964	39147964	61	1.377	66.272	123.315	0	4323.384	9	0.500	1	-10921639	123.103	122	111	141	11941	6.472	0.708	0.016	0.590
507	ID39119171	39119171	62	1.509	13.430	13.348	0	0.000	0	0.500	1	-10921639	123.608	122	114	141	11990	6.113	0.496	0.015	0.590
508	ID39284657	39284657	62	1.598	15.496	12.248	0	480.376	1	0.500	1	-10921639	122.835	122	111	153	11915	7.088	1.396	0.012	0.425
509	ID39095325	39095325	62	1.163	14.931	11.189	0	960.752	2	0.500	1	-10921639	121.680	121	111	146	11803	5.548	1.900	0.012	0.502
510	ID39230671	39230671	62	1.126	15.598	11.759	0	1441.128	3	0.500	1	-10921639	120.722	120	110	141	11710	5.973	0.482	0.012	0.468
511	ID39335899	39335899	62	1.538	14.270	12.886	0	1921.504	4	0.500	1	-10921639	123.577	121	112	151	11987	7.207	1.608	0.011	0.368
512	ID39090655	39090655	62	1.122	13.948	12.353	0	2401.880	5	0.500	1	-10921639	122.959	123	109	143	11927	6.250	1.726	0.011	0.428
513	ID39258301	39258301	63	1.229	71.069	190.125	0	0.000	0	0.500	1	-10921639	122.237	121	111	142	11857	6.419	0.483	0.017	0.627
514	ID39418058	39418058	63	1.167	72.704	189.615	0	480.376	1	0.500	1	-10921639	121.753	120	111	142	11810	5.824	1.601	0.014	0.558
515	ID39277537	39277537	63	1.827	71.541	189.205	0	960.752	2	0.500	1	-10921639	123.619	122	112	160	11991	7.934	0.485	0.020	0.605
516	ID39392302	39392302	63	1.078	69.669	189.333	0	1441.128	3	0.500	1	-10921639	120.907	119	110	148	11728	6.513	1.592	0.012	0.430
517	ID39433434	39433434	63	2.016	68.343	189.783	0	1921.504	4	0.500	1	-10921639	122.278	120	109	149	11861	8.286	1.826	0.022	0.637
518	ID39250511	39250511	63	2.208	69.007	189.897	0	2401.880	5	0.500	1	-10921639	122.918	121	109	155	11923	9.486	1.900	0.023	0.571
519	ID39327650	39327650	63	2.124	70.504	188.754	0	2882.256	6	0.500	1	-10921639	123.753	121	112	152	12004	8.923	1.809	0.020	0.557
520	ID39271954	39271954	64	1.623	58.419	203.180	0	0.000	0	0.500	1	-10921639	123.454	122	110	146	11975	7.231	1.398	0.017	0.586
521	ID39423426	39423426	64	1.647	58.749	203.000	0	480.376	1	0.500	1	-10921639	122.505	121	110	155	11883	7.780	0.481	0.016	0.487
522	ID39394970	39394970	64	1.736	59.009	202.040	0	1441.128	3	0.500	1	-10921639	124.196	123	110	155	12047	7.617	0.480	0.014	0.452
523	ID39433949	39433949	64	1.930	58.850	202.393	0	1921.504	4	0.500	1	-10921639	124.072	122	110	151	12035	7.874	0.718	0.023	0.712
524	ID39254893	39254893	64	1.255	60.125	202.335	0	2401.880	5	0.500	1	-10921639	122.052	121	111	135	11839	5.824	0.709	0.011	0.463
525	ID39145654	39145654	65	1.621	18.154	57.968	0	0.000	0	0.500	1	-10921639	125.639	125	113	146	12187	6.193	1.785	0.016	0.651
526	ID39317278	39317278	65	1.881	18.156	57.610	0	480.376	1	0.500	1	-10921639	124.742	124	110	148	12100	7.488	1.609	0.027	0.862
527	ID39126781	39126781	65	1.229	18.629	57.208	0	960.752	2	0.500	1	-10921639	123.722	124	113	142	12001	5.578	0.722	0.016	0.718
528	ID39298950	39298950	65	1.290	18.316	56.968	0	1441.128	3	0.500	1	-10921639	124.000	123	111	149	12028	6.476	1.804	0.010	0.392
529	ID39374559	39374559	65	1.222	18.348	57.053	0	1921.504	4	0.500	1	-10921639	122.505	122	109	139	11883	5.443	0.709	0.015	0.651
530	ID39127022	39127022	65	0.946	18.199	56.815	0	2401.880	5	0.500	1	-10921639	120.794	120	108	141	11717	5.701	0.496	0.014	0.565
531	ID39217041	39217041	65	1.446	17.481	58.662	0	2882.256	6	0.500	1	-10921639	121.711	120	110	152	11806	6.918	1.624	0.019	0.645
532	ID39103736	39103736	65	1.110	17.623	59.064	0	3362.632	7	0.500	1	-10921639	122.165	122	112	137	11850	5.271	1.616	0.011	0.519
533	ID39310071	39310071	65	1.588	16.310	59.929	0	3843.008	8	0.500	1	-10921639	120.938	119	110	148	11731	7.021	0.480	0.012	0.408
534	ID39086536	39086536	65	1.756	16.440	59.605	0	4323.384	9	0.500	1	-10921639	121.474	120	109	162	11783	8.880	0.490	0.014	0.383
535	ID39121368	39121368	66	1.672	89.723	22.737	0	0.000	0	0.500	1	-10921639	123.876	122	112	155	12016	7.805	0.491	0.021	0.648
536	ID39286754	39286754	66	2.116	90.437	22.696	0	480.376	1	0.500	1	-10921639	126.062	125	113	155	12228	8.022	0.486	0.016	0.502
537	ID39101104	39101104	66	1.572	90.584	21.946	0	960.752	2	0.500	1	-10921639	124.443	122	113	145	12071	6.982	0.486	0.017	0.611
538	ID39247208	39247208	66	1.245	90.787	21.827	0	1441.128	3	0.500	1	-10921639	124.196	123	111	151	12047	6.565	1.816	0.013	0.476
539	ID39349715	39349715	66	1.435	90.664	21.786	0	1921.504	4	0.500	1	-10921639	125.351	125	115	152	12159	5.840	1.804	0.014	0.580
540	ID39098452	39098452	66	0.944	90.768	22.443	0	2401.880	5	0.500	1	-10921639	122.144	122	111	146	11848	5.528	1.820	0.011	0.485
541	ID39096602	39096602	66	0.953	90.549	21.567	0	2401.880	5	0.500	1	-10921639	123.485	123	113	159	11978	6.775	1.758	0.007	0.245
542	ID39181267	39181267	66	1.284	90.624	21.752	0	2882.256	6	0.500	1	-10921639	123.784	123	112	157	12007	7.181	1.786	0.013	0.427
543	ID39179053	39179053	66	1.007	90.621	22.373	0	2882.256	6	0.500	1	-10921639	123.206	123	112	143	11951	5.986	1.599	0.008	0.327
544	ID39083285	39083285	66	0.916	90.377	22.800	0	3362.632	7	0.500	1	-10921639	121.186	121	110	145	11755	5.924	1.601	0.011	0.447
545	ID39265774	39265774	66	1.406	88.712	21.580	0	3843.008	8	0.500	1	-10921639	122.206	121	109	144	11854	6.881	1.827	0.016	0.570
546	ID39075032	39075032	66	1.522	87.848	21.031	0	4323.384	9	0.500	1	-10921639	121.144	120	109	146	11751	6.738	1.789	0.016	0.573
547	ID39399208	39399208	67	1.052	178.714	207.762	0	1441.128	3	0.500	1	-10921639	122.969	123	113	136	11928	4.986	1.602	0.011	0.538
548	ID39436754	39436754	67	0.983	177.833	208.250	0	1921.504	4	0.500	1	-10921639	122.433	122	112	140	11876	5.447	1.900	0.009	0.420
549	ID39259045	39259045	67	1.287	177.662	208.089	0	2401.880	5	0.500	1	-10921639	122.299	121	111	143	11863	6.315	0.490	0.013	0.483
550	ID39341808	39341808	67	0.985	178.223	207.332	0	2882.256	6	0.500	1	-10921639	122.990	123	112	137	11930	5.225	0.485	0.012	0.538
551	ID39278668	39278668	68	1.458	45.035	220.329	0	0.000	0	0.500	1	-10921639	122.206	121	110	143	11854	6.352	1.900	0.016	0.589
552	ID39429731	39429731	68	1.517	45.392	221.325	0	480.376	1	0.500	1	-10921639	116.784	122	48	144	11328	20.475	1.790	0.056	0.602
553	ID39303982	39303982	68	0.967	45.283	221.325	0	960.752	2	0.500	1	-10921639	113.588	120	46	136	11018	19.435	1.796	0.048	0.539
554	ID39407687	39407687	68	1.189	45.175	221.325	0	1441.128	3	0.500	1	-10921639	112.392	119	47	136	10902	19.692	1.789	0.057	0.620
555	ID39437010	39437010	68	0.975	45.729	220.847	0	1921.504	4	0.500	1	-10921639	122.814	122	113	140	11913	5.707	1.900	0.011	0.468
556	ID39276160	39276160	68	1.334	45.933	221.325	0	2401.880	5	0.500	1	-10921639	114.227	120	46	153	11080	20.615	1.785	0.050	0.531
557	ID39240535	39240535	68	1.236	45.098	220.908	0	3362.632	7	0.500	1	-10921639	121.670	121	111	141	11802	6.166	1.900	0.013	0.508
558	ID39408437	39408437	68	1.087	45.999	220.577	0	3843.008	8	0.500	1	-10921639	121.082	121	108	151	11745	5.667	1.831	0.015	0.651
559	ID39273781	39273781	68	1.444	45.067	221.325	0	4323.384	9	0.500	1	-10921639	112.588	118	47	147	10921	20.077	1.788	0.051	0.549
560	ID39195931	39195931	69	1.613	65.824	118.910	0	0.000	0	0.500	1	-10921639	119.577	118	108	153	11599	8.110	1.404	0.017	0.507
561	ID39375172	39375172	69	1.745	66.535	118.778	0	480.376	1	0.500	1	-10921639	120.000	118	108	150	11640	8.602	0.486	0.022	0.602
562	ID39183960	39183960	69	1.516	66.612	118.636	0	960.752	2	0.500	1	-10921639	118.567	117	107	150	11501	7.986	0.480	0.008	0.232
563	ID39350967	39350967	69	1.498	66.591	118.407	0	1441.128	3	0.500	1	-10921639	119.010	117	106	151	11544	7.927	0.482	0.017	0.497
564	ID39410900	39410900	69	1.221	66.715	118.451	0	1921.504	4	0.500	1	-10921639	118.082	116	109	141	11454	6.796	1.900	0.014	0.496
565	ID39172066	39172066	69	1.151	66.619	118.606	0	2401.880	5	0.500	1	-10921639	118.165	117	106	139	11462	6.520	1.581	0.012	0.431
566	ID39285188	39285188	69	1.794	66.538	118.763	0	2882.256	6	0.500	1	-10921639	120.227	118	109	148	11662	8.610	0.708	0.021	0.566
567	ID39147902	39147902	69	1.425	66.506	118.839	0	3362.632	7	0.500	1	-10921639	118.804	117	108	147	11524	6.959	0.490	0.018	0.598
568	ID39345946	39345946	69	1.157	66.499	119.002	0	3843.008	8	0.500	1	-10921639	118.206	117	108	141	11466	6.705	0.492	0.016	0.569
569	ID39127351	39127351	70	1.100	28.959	57.812	0	960.752	2	0.500	1	-10921639	120.113	119	110	144	11651	6.218	1.781	0.010	0.392
570	ID39299055	39299055	70	1.142	29.068	57.418	0	1441.128	3	0.500	1	-10921639	120.381	119	110	141	11677	5.917	0.708	0.009	0.354
571	ID39374806	39374806	70	1.260	28.480	57.536	0	1921.504	4	0.500	1	-10921639	120.103	119	108	137	11650	5.919	0.491	0.016	0.621
572	ID39128537	39128537	70	1.863	29.671	58.443	0	2401.880	5	0.500	1	-10921639	121.598	119	108	150	11795	8.464	0.464	0.022	0.628
573	ID39212617	39212617	70	1.572	30.598	57.962	0	2882.256	6	0.500	1	-10921639	121.897	121	109	160	11824	7.972	0.706	0.015	0.453
574	ID39099536	39099536	70	1.632	30.572	57.781	0	3362.632	7	0.500	1	-10921639	121.072	119	109	151	11744	7.976	0.705	0.017	0.506
575	ID39304635	39304635	70	1.558	29.917	58.229	0	3843.008	8	0.500	1	-10921639	121.423	120	110	155	11778	7.598	1.900	0.018	0.554
576	ID39278471	39278471	71	2.363	207.159	220.003	0	0.000	0	0.500	1	-10921639	127.526	125	113	157	12370	9.453	0.490	0.018	0.486
577	ID39428387	39428387	71	1.557	207.983	218.724	0	480.376	1	0.500	1	-10921639	124.629	124	109	158	12089	7.970	0.492	0.017	0.518
578	ID39304830	39304830	71	1.439	208.190	218.954	0	960.752	2	0.500	1	-10921639	123.351	122	110	156	11965	7.483	1.900	0.012	0.376
579	ID39436502	39436502	71	0.908	207.596	219.350	0	1921.504	4	0.500	1	-10921639	122.959	122	112	146	11927	6.324	0.982	0.011	0.428
580	ID39280725	39280725	71	1.092	207.938	219.447	0	2401.880	5	0.500	1	-10921639	124.144	123	113	150	12042	6.519	0.704	0.010	0.384
581	ID39350680	39350680	71	1.213	207.182	219.496	0	2882.256	6	0.500	1	-10921639	123.454	123	112	148	11975	6.085	1.686	0.015	0.585
582	ID39408410	39408410	71	0.979	207.364	220.384	0	3843.008	8	0.500	1	-10921639	123.010	123	108	138	11932	5.382	0.719	0.007	0.334
583	ID39272151	39272151	71	0.924	206.931	219.920	0	4323.384	9	0.500	1	-10921639	123.412	123	112	142	11971	6.010	1.602	0.006	0.247
584	ID39375147	39375147	72	1.196	28.505	118.697	0	480.376	1	0.500	1	-10921639	123.134	122	112	149	11944	6.169	1.612	0.011	0.450
585	ID39183946	39183946	72	1.539	28.572	118.599	0	960.752	2	0.500	1	-10921639	125.845	126	112	146	12207	6.368	1.582	0.013	0.503
586	ID39351021	39351021	72	1.757	28.672	118.520	0	1441.128	3	0.500	1	-10921639	126.392	125	115	144	12260	7.559	1.900	0.016	0.524
587	ID39410889	39410889	72	1.874	28.593	118.435	0	1921.504	4	0.500	1	-10921639	128.443	127	115	147	12459	7.562	1.791	0.019	0.630
588	ID39172046	39172046	72	2.388	28.496	118.611	0	2401.880	5	0.500	1	-10921639	129.392	128	116	156	12551	9.196	0.714	0.020	0.563
589	ID39285168	39285168	72	1.769	28.399	118.779	0	2882.256	6	0.500	1	-10921639	128.691	128	110	150	12483	7.756	0.492	0.020	0.660
590	ID39147836	39147836	72	2.488	28.384	118.748	0	3362.632	7	0.500	1	-10921639	131.093	130	115	159	12716	9.611	0.488	0.020	0.537
591	ID39345889	39345889	72	2.402	28.292	119.018	0	3843.008	8	0.500	1	-10921639	131.351	130	115	164	12741	9.132	0.493	0.021	0.602
592	ID39146184	39146184	72	2.096	28.138	118.984	0	4323.384	9	0.500	1	-10921639	128.784	128	113	154	12492	8.808	0.495	0.027	0.774
593	ID39140659	39140659	73	1.799	90.370	71.903	0	960.752	2	0.500	1	-10921639	123.155	122	111	147	11946	7.398	0.488	0.012	0.388
594	ID39315196	39315196	73	1.924	91.438	71.834	0	1441.128	3	0.500	1	-10921639	123.443	122	108	141	11974	7.040	0.708	0.015	0.530
595	ID39383753	39383753	73	1.694	91.024	72.165	0	1921.504	4	0.500	1	-10921639	122.464	122	109	144	11879	7.068	1.900	0.016	0.541
596	ID39135605	39135605	73	1.515	90.221	72.136	0	2401.880	5	0.500	1	-10921639	122.155	121	111	146	11849	7.438	1.900	0.021	0.664
597	ID39233330	39233330	73	1.570	90.278	72.494	0	2882.256	6	0.500	1	-10921639	122.536	121	109	146	11886	6.945	1.900	0.012	0.432
598	ID39110222	39110222	74	1.189	0.727	2.842	0	0.000	0	0.500	1	-10921639	120.052	119	110	138	11645	5.828	1.802	0.007	0.303
599	ID39272494	39272494	74	1.028	1.282	2.116	0	480.376	1	0.500	1	-10921639	119.742	119	108	136	11615	5.934	0.707	0.015	0.595
600	ID39087580	39087580	74	1.055	1.237	1.889	0	960.752	2	0.500	1	-10921639	120.103	120	108	138	11650	6.039	0.491	0.007	0.260
601	ID39222453	39222453	74	0.897	1.451	1.862	0	1441.128	3	0.500	1	-10921639	120.371	120	108	136	11676	5.392	1.795	0.004	0.195
602	ID39328970	39328970	74	1.515	1.244	2.113	0	1921.504	4	0.500	1	-10921639	121.814	120	110	150	11816	7.805	1.900	0.015	0.457
603	ID39085568	39085568	74	1.012	0.965	2.177	0	2401.880	5	0.500	1	-10921639	120.340	119	109	144	11673	6.823	1.803	0.011	0.401
604	ID39165337	39165337	74	1.127	1.059	2.131	0	2882.256	6	0.500	1	-10921639	121.835	122	111	141	11818	6.381	1.900	0.010	0.394
605	ID39271071	39271071	75	1.348	47.342	206.919	0	0.000	0	0.500	1	-10921639	122.361	122	112	142	11869	6.257	1.900	0.016	0.611
606	ID39424552	39424552	75	0.942	48.103	206.388	0	480.376	1	0.500	1	-10921639	121.144	120	111	149	11751	6.927	0.869	0.014	0.469
607	ID39400714	39400714	75	1.426	47.977	205.647	0	1441.128	3	0.500	1	-10921639	122.402	121	109	146	11873	6.967	1.618	0.010	0.335
608	ID39434442	39434442	75	0.954	47.768	205.388	0	1921.504	4	0.500	1	-10921639	121.557	121	109	150	11791	6.285	1.777	0.014	0.520
609	ID39269413	39269413	75	1.091	48.201	206.404	0	2401.880	5	0.500	1	-10921639	122.433	122	113	137	11876	5.377	1.603	0.014	0.645
610	ID39337441	39337441	75	1.146	47.880	206.147	0	2882.256	6	0.500	1	-10921639	121.763	122	110	139	11811	5.642	1.609	0.009	0.388
611	ID39222385	39222385	75	1.448	47.549	205.554	0	3362.632	7	0.500	1	-10921639	123.227	122	112	147	11953	6.547	1.703	0.009	0.335
612	ID39396997	39396997	75	1.144	47.797	205.600	0	3843.008	8	0.500	1	-10921639	122.351	122	110	148	11868	6.362	0.490	0.008	0.308
613	ID39254788	39254788	75	0.954	47.244	205.182	0	4323.384	9	0.500	1	-10921639	121.340	120	113	141	11770	5.960	1.612	0.013	0.530
614	ID39087781	39087781	76	1.132	36.279	1.569	0	960.752	2	0.500	1	-10921639	122.000	121	109	139	11834	5.536	0.490	0.010	0.426
615	ID39221650	39221650	76	1.290	36.696	1.355	0	1441.128	3	0.500	1	-10921639	122.515	122	112	140	11884	6.035	0.710	0.014	0.559
616	ID39328460	39328460	76	1.583	36.634	1.245	0	1921.504	4	0.500	1	-10921639	122.371	120	109	153	11870	7.897	0.485	0.014	0.440
617	ID39088643	39088643	76	1.307	36.361	1.187	0	2401.880	5	0.500	1	-10921639	123.031	123	111	151	11934	6.642	1.638	0.013	0.478
618	ID39256943	39256943	77	2.574	133.877	191.569	0	0.000	0	0.500	1	-10921639	129.979	127	118	160	12608	9.334	0.490	0.022	0.595
619	ID39420340	39420340	77	0.882	134.036	191.343	0	480.376	1	0.500	1	-10921639	123.113	123	112	143	11942	5.868	0.708	0.014	0.567
620	ID39275148	39275148	77	1.125	133.782	190.869	0	960.752	2	0.500	1	-10921639	122.330	121	112	140	11866	6.166	1.900	0.013	0.494
621	ID39392802	39392802	77	1.615	133.460	190.278	0	1441.128	3	0.500	1	-10921639	123.371	122	110	148	11967	7.121	0.490	0.021	0.704
622	ID39433421	39433421	77	2.247	133.940	189.679	0	1921.504	4	0.500	1	-10921639	125.258	123	110	154	12150	8.818	0.488	0.023	0.629
623	ID39243711	39243711	77	1.935	134.097	189.207	0	2401.880	5	0.500	1	-10921639	124.485	122	112	153	12075	8.430	1.803	0.020	0.579
624	ID39329000	39329000	77	1.642	134.159	190.495	0	2882.256	6	0.500	1	-10921639	125.495	124	112	144	12173	7.109	0.708	0.015	0.512
625	ID39204208	39204208	77	1.868	133.714	189.720	0	3362.632	7	0.500	1	-10921639	125.010	124	113	157	12126	7.705	1.900	0.022	0.711
626	ID39386835	39386835	77	2.191	134.206	190.941	0	3843.008	8	0.500	1	-10921639	125.423	124	111	160	12166	9.098	0.484	0.022	0.592
627	ID39241744	39241744	77	1.613	135.143	190.640	0	4323.384	9	0.500	1	-10921639	122.660	121	112	147	11898	7.084	0.479	0.012	0.416
628	ID39146366	39146366	78	1.067	20.791	58.589	0	0.000	0	0.500	1	-10921639	121.763	121	111	146	11811	6.005	1.900	0.010	0.395
629	ID39317509	39317509	78	1.157	21.402	58.354	0	480.376	1	0.500	1	-10921639	120.701	119	111	142	11708	6.161	0.710	0.011	0.421
630	ID39126443	39126443	78	1.506	21.706	56.611	0	960.752	2	0.500	1	-10921639	123.031	121	112	141	11934	6.846	0.482	0.013	0.458
631	ID39297295	39297295	78	1.540	21.582	55.602	0	1441.128	3	0.500	1	-10921639	122.165	121	112	148	11850	6.760	1.900	0.014	0.516
632	ID39369421	39369421	78	1.598	21.493	55.938	0	1921.504	4	0.500	1	-10921639	123.165	122	108	140	11947	6.979	1.815	0.014	0.489
633	ID39125189	39125189	78	1.248	21.332	56.586	0	2401.880	5	0.500	1	-10921639	122.175	121	111	140	11851	5.585	0.492	0.012	0.537
634	ID39211568	39211568	78	1.495	21.188	57.086	0	2882.256	6	0.500	1	-10921639	123.268	123	111	146	11957	6.571	1.900	0.020	0.753
635	ID39102334	39102334	78	1.499	21.429	56.633	0	3362.632	7	0.500	1	-10921639	122.010	121	111	157	11835	7.236	1.900	0.014	0.480
636	ID39301918	39301918	78	0.922	20.929	56.866	0	3843.008	8	0.500	1	-10921639	120.175	119	110	139	11657	4.912	1.805	0.009	0.436
637	ID39084990	39084990	78	1.093	20.016	55.515	0	4323.384	9	0.500	1	-10921639	119.701	119	105	140	11611	5.865	1.900	0.011	0.430
638	ID39234943	39234943	79	0.888	144.395	165.691	0	0.000	0	0.500	1	-10921639	121.247	121	110	134	11761	4.837	1.703	0.010	0.487
639	ID39409684	39409684	79	1.174	145.670	164.418	0	480.376	1	0.500	1	-10921639	122.495	121	112	145	11882	6.842	0.492	0.007	0.260
640	ID39243355	39243355	79	0.944	145.202	164.909	0	960.752	2	0.500	1	-10921639	120.639	120	109	163	11702	6.478	1.900	0.005	0.176
641	ID39377424	39377424	79	1.981	145.302	163.778	0	1441.128	3	0.500	1	-10921639	123.639	122	111	157	11993	8.467	0.479	0.017	0.497
642	ID39425743	39425743	79	1.694	146.102	164.543	0	1921.504	4	0.500	1	-10921639	124.546	124	112	155	12081	8.568	1.900	0.012	0.356
643	ID39217253	39217253	79	1.211	146.628	165.156	0	2401.880	5	0.500	1	-10921639	121.546	120	111	148	11790	7.168	1.385	0.013	0.420
644	ID39312655	39312655	79	1.400	147.566	163.401	0	2882.256	6	0.500	1	-10921639	123.948	122	109	155	12023	7.480	1.900	0.010	0.342
645	ID39181307	39181307	79	1.157	147.682	163.318	0	3362.632	7	0.500	1	-10921639	123.588	123	109	143	11988	6.313	0.489	0.011	0.438
646	ID39376216	39376216	79	1.337	147.575	163.592	0	3843.008	8	0.500	1	-10921639	123.113	122	111	138	11942	6.276	0.706	0.016	0.616
647	ID39423436	39423436	80	1.185	130.185	202.970	0	480.376	1	0.500	1	-10921639	123.175	121	112	150	11948	6.591	0.716	0.015	0.547
648	ID39290841	39290841	80	1.357	130.059	203.006	0	960.752	2	0.500	1	-10921639	123.825	122	112	143	12011	7.143	1.900	0.010	0.350
649	ID39397304	39397304	80	1.222	129.484	202.971	0	1441.128	3	0.500	1	-10921639	123.536	122	112	142	11983	6.554	1.598	0.012	0.458
650	ID39433934	39433934	80	1.209	129.564	202.247	0	1921.504	4	0.500	1	-10921639	123.928	124	114	143	12021	6.350	1.900	0.014	0.557
651	ID39255829	39255829	80	1.073	129.518	203.288	0	2401.880	5	0.500	1	-10921639	123.268	122	111	141	11957	6.229	1.597	0.011	0.433
652	ID39340427	39340427	80	0.995	129.084	203.754	0	2882.256	6	0.500	1	-10921639	122.464	120	109	143	11879	6.326	0.491	0.007	0.288
653	ID39226778	39226778	80	1.178	129.471	203.630	0	3362.632	7	0.500	1	-10921639	123.320	122	111	150	11962	7.044	0.704	0.013	0.436
654	ID39399834	39399834	80	1.374	129.327	203.828	0	3843.008	8	0.500	1	-10921639	124.289	124	112	142	12056	6.147	1.792	0.016	0.628
655	ID39259468	39259468	80	1.079	129.317	203.881	0	4323.384	9	0.500	1	-10921639	124.144	123	114	146	12042	6.038	0.725	0.012	0.473
656	ID39168497	39168497	81	1.593	198.760	88.337	0	0.000	0	0.500	1	-10921639	119.835	118	109	144	11624	7.173	0.492	0.012	0.395
657	ID39345014	39345014	81	1.188	198.828	87.819	0	480.376	1	0.500	1	-10921639	119.701	119	109	144	11611	6.685	1.900	0.014	0.484
658	ID39155922	39155922	81	1.795	198.511	88.644	0	960.752	2	0.500	1	-10921639	121.041	119	109	157	11741	8.209	0.477	0.019	0.544
659	ID39327566	39327566	81	1.498	197.885	88.097	0	1441.128	3	0.500	1	-10921639	119.412	118	108	141	11583	6.628	0.721	0.015	0.531
660	ID39395008	39395008	81	0.974	197.711	88.650	0	1921.504	4	0.500	1	-10921639	118.031	118	107	134	11449	5.209	1.808	0.014	0.609
661	ID39146642	39146642	81	1.053	197.663	89.005	0	2401.880	5	0.500	1	-10921639	119.247	118	108	173	11567	7.980	1.782	0.012	0.358
662	ID39248539	39248539	81	0.924	197.854	89.147	0	2882.256	6	0.500	1	-10921639	119.546	118	109	144	11596	6.185	1.900	0.013	0.481
663	ID39274665	39274665	82	0.996	0.000	5.308	0	480.376	1	0.500	1	-10921639	109.680	114	47	139	10639	19.446	1.789	0.053	0.566
664	ID39090259	39090259	82	1.243	0.391	5.322	0	960.752	2	0.500	1	-10921639	120.907	119	109	156	11728	7.495	1.840	0.011	0.340
665	ID39228032	39228032	82	1.215	0.916	5.374	0	1441.128	3	0.500	1	-10921639	120.691	120	108	140	11707	6.501	0.700	0.012	0.452
666	ID39329987	39329987	82	1.158	1.032	5.262	0	1921.504	4	0.500	1	-10921639	120.701	120	109	150	11708	6.513	0.483	0.010	0.354
667	ID39087281	39087281	82	1.113	0.000	5.525	0	2401.880	5	0.500	1	-10921639	113.258	119	45	146	10986	19.903	1.795	0.042	0.456
668	ID39174524	39174524	82	1.687	0.426	6.546	0	2882.256	6	0.500	1	-10921639	123.299	122	113	159	11960	8.483	1.829	0.015	0.418
669	ID39081547	39081547	82	1.391	0.848	6.501	0	3362.632	7	0.500	1	-10921639	121.237	120	111	147	11760	6.663	0.494	0.015	0.523
670	ID39241431	39241431	82	1.246	0.251	6.785	0	3843.008	8	0.500	1	-10921639	121.577	122	100	138	11793	7.308	1.614	0.021	0.675
671	ID39072854	39072854	82	1.172	0.503	6.220	0	4323.384	9	0.500	1	-10921639	120.619	119	111	156	11700	6.903	1.630	0.012	0.400
672	ID39273546	39273546	83	0.961	186.230	209.758	0	0.000	0	0.500	1	-10921639	123.526	123	112	138	11982	5.602	1.781	0.011	0.476
673	ID39425819	39425819	83	0.949	187.012	209.864	0	480.376	1	0.500	1	-10921639	122.361	123	111	135	11869	5.430	1.807	0.007	0.316
674	ID39293471	39293471	83	0.954	186.846	209.373	0	960.752	2	0.500	1	-10921639	122.526	121	113	146	11885	6.455	1.416	0.009	0.330
675	ID39400384	39400384	83	1.366	185.584	209.883	0	1441.128	3	0.500	1	-10921639	121.845	120	110	143	11819	6.783	0.477	0.012	0.409
676	ID39435717	39435717	83	1.873	184.708	209.880	0	1921.504	4	0.500	1	-10921639	124.072	123	113	157	12035	8.321	1.814	0.023	0.665
677	ID39260734	39260734	83	1.666	184.404	209.711	0	2401.880	5	0.500	1	-10921639	124.361	123	112	144	12063	6.516	0.707	0.014	0.532
678	ID39345818	39345818	83	1.750	184.886	209.745	0	2882.256	6	0.500	1	-10921639	124.845	123	113	148	12110	7.032	1.900	0.014	0.476
679	ID39234408	39234408	83	1.486	185.411	209.781	0	3362.632	7	0.500	1	-10921639	124.021	122	111	146	12030	7.185	1.900	0.013	0.440
680	ID39402830	39402830	83	1.476	185.472	210.411	0	3843.008	8	0.500	1	-10921639	124.010	124	111	149	12029	6.980	0.700	0.009	0.334
681	ID39269660	39269660	83	0.938	185.123	209.984	0	4323.384	9	0.500	1	-10921639	121.835	122	112	134	11818	5.731	0.914	0.015	0.619
682	ID39323980	39323980	84	1.332	190.869	63.186	0	480.376	1	0.500	1	-10921639	121.629	121	109	139	11798	6.545	0.710	0.013	0.473
683	ID39133183	39133183	84	1.467	190.967	63.237	0	960.752	2	0.500	1	-10921639	122.299	121	111	142	11863	6.824	1.789	0.011	0.389
684	ID39304394	39304394	84	1.201	187.239	63.948	0	1441.128	3	0.500	1	-10921639	120.598	120	111	148	11698	6.723	0.895	0.015	0.514
685	ID39380165	39380165	84	1.254	191.105	63.401	0	1921.504	4	0.500	1	-10921639	120.454	119	109	148	11684	6.759	1.663	0.011	0.384
686	ID39140899	39140899	84	1.010	190.686	63.418	0	2401.880	5	0.500	1	-10921639	121.691	121	112	147	11804	5.751	0.708	0.010	0.400
687	ID39183939	39183939	85	1.053	27.090	118.626	0	960.752	2	0.500	1	-10921639	122.804	122	111	146	11912	6.399	1.800	0.013	0.488
688	ID39344829	39344829	85	1.032	27.036	118.325	0	1441.128	3	0.500	1	-10921639	122.722	122	109	143	11904	6.584	1.598	0.010	0.381
689	ID39410887	39410887	85	1.080	27.013	118.435	0	1921.504	4	0.500	1	-10921639	123.124	123	110	141	11943	6.758	1.393	0.009	0.330
690	ID39172041	39172041	85	1.019	26.908	118.589	0	2401.880	5	0.500	1	-10921639	124.165	123	112	140	12044	6.777	0.489	0.005	0.198
691	ID39285166	39285166	85	1.035	26.954	118.741	0	2882.256	6	0.500	1	-10921639	124.928	125	115	149	12118	5.946	1.775	0.014	0.600
692	ID39147832	39147832	85	1.099	26.589	118.720	0	3362.632	7	0.500	1	-10921639	123.732	123	110	144	12002	6.771	0.710	0.008	0.282
693	ID39345934	39345934	85	1.319	26.620	118.946	0	3843.008	8	0.500	1	-10921639	125.990	125	107	153	12221	7.123	1.773	0.012	0.410
694	ID39146177	39146177	85	1.271	26.494	118.931	0	4323.384	9	0.500	1	-10921639	125.072	123	112	148	12132	7.774	1.900	0.012	0.381
695	ID39236104	39236104	86	1.388	105.777	163.948	0	0.000	0	0.500	1	-10921639	122.402	121	111	142	11873	6.535	1.900	0.018	0.679
696	ID39409305	39409305	86	1.782	106.591	163.468	0	480.376	1	0.500	1	-10921639	124.639	123	112	157	12090	7.551	1.900	0.021	0.671
697	ID39240882	39240882	86	0.972	106.203	163.111	0	960.752	2	0.500	1	-10921639	121.392	121	113	134	11775	5.102	1.796	0.009	0.406
698	ID39240893	39240893	86	0.993	107.720	163.150	0	960.752	2	0.500	1	-10921639	120.000	119	111	146	11640	5.692	0.707	0.007	0.282
699	ID39376949	39376949	86	1.265	108.056	163.060	0	1441.128	3	0.500	1	-10921639	120.289	119	109	146	11668	7.086	1.900	0.022	0.716
700	ID39377007	39377007	86	1.242	104.160	163.099	0	1441.128	3	0.500	1	-10921639	122.021	122	110	144	11836	6.151	0.478	0.010	0.404
701	ID39424764	39424764	86	1.253	103.094	162.977	0	1921.504	4	0.500	1	-10921639	121.670	121	110	142	11802	6.235	0.496	0.012	0.474
702	ID39424917	39424917	86	1.522	108.944	163.615	0	1921.504	4	0.500	1	-10921639	121.701	119	110	149	11805	7.265	0.484	0.012	0.411
703	ID39213996	39213996	86	1.235	107.750	163.079	0	2401.880	5	0.500	1	-10921639	121.495	121	111	143	11785	6.431	0.481	0.014	0.532
704	ID39214088	39214088	86	1.495	104.001	163.100	0	2401.880	5	0.500	1	-10921639	121.680	120	111	153	11803	7.743	1.585	0.014	0.434
705	ID39312500	39312500	86	1.142	104.141	163.126	0	2882.256	6	0.500	1	-10921639	121.907	122	111	146	11825	6.632	0.715	0.013	0.487
706	ID39312704	39312704	86	1.165	106.749	163.513	0	2882.256	6	0.500	1	-10921639	121.474	120	109	142	11783	6.398	1.784	0.015	0.576
707	ID39181281	39181281	86	1.212	104.130	163.318	0	3362.632	7	0.500	1	-10921639	122.082	121	111	141	11842	5.737	0.488	0.012	0.512
708	ID39425509	39425509	87	0.894	188.021	208.931	0	480.376	1	0.500	1	-10921639	122.546	122	108	139	11887	5.906	1.398	0.001	0.050
709	ID39293243	39293243	87	0.947	188.292	209.196	0	960.752	2	0.500	1	-10921639	122.835	122	110	141	11915	5.541	0.488	0.009	0.396
710	ID39399635	39399635	87	0.961	188.907	208.496	0	1441.128	3	0.500	1	-10921639	122.196	122	110	146	11853	5.767	1.797	0.009	0.393
711	ID39436779	39436779	87	1.499	189.642	208.349	0	1921.504	4	0.500	1	-10921639	122.990	122	112	155	11930	7.535	1.900	0.018	0.567
712	ID39259859	39259859	87	1.274	189.586	208.971	0	2401.880	5	0.500	1	-10921639	123.010	122	108	140	11932	6.389	1.401	0.013	0.499
713	ID39345906	39345906	87	1.113	188.651	209.881	0	2882.256	6	0.500	1	-10921639	122.639	122	111	148	11896	6.612	0.488	0.013	0.491
714	ID39234559	39234559	87	1.037	187.346	209.924	0	3362.632	7	0.500	1	-10921639	122.773	122	113	147	11909	6.292	1.612	0.009	0.350
715	ID39117580	39117580	88	1.733	159.298	15.576	0	0.000	0	0.500	1	-10921639	125.206	123	112	154	12145	8.714	1.900	0.011	0.302
716	ID39287614	39287614	88	1.015	159.921	15.648	0	480.376	1	0.500	1	-10921639	123.113	123	113	140	11942	5.712	1.900	0.007	0.289
717	ID39100720	39100720	88	1.155	160.735	15.463	0	960.752	2	0.500	1	-10921639	122.557	122	109	153	11888	7.016	1.900	0.014	0.466
718	ID39251070	39251070	88	1.467	159.865	15.182	0	1441.128	3	0.500	1	-10921639	125.258	124	110	150	12150	7.178	1.607	0.018	0.603
719	ID39333611	39333611	88	1.298	159.618	15.279	0	1921.504	4	0.500	1	-10921639	122.670	122	109	146	11899	7.300	1.798	0.015	0.483
720	ID39092578	39092578	88	1.422	159.426	15.415	0	2401.880	5	0.500	1	-10921639	122.619	121	112	150	11894	7.495	1.691	0.019	0.602
721	ID39174222	39174222	88	1.065	159.222	15.476	0	2882.256	6	0.500	1	-10921639	122.577	122	112	141	11890	5.954	0.703	0.007	0.295
722	ID39081790	39081790	88	1.686	157.672	14.245	0	3362.632	7	0.500	1	-10921639	123.856	123	113	155	12014	7.389	1.830	0.020	0.643
723	ID39255048	39255048	88	1.548	156.093	13.151	0	3843.008	8	0.500	1	-10921639	121.021	119	109	149	11739	6.921	0.477	0.016	0.540
724	ID39072413	39072413	88	1.143	155.717	12.890	0	4323.384	9	0.500	1	-10921639	119.990	119	109	138	11639	5.860	1.845	0.009	0.382
725	ID39404827	39404827	89	1.273	96.945	217.593	0	1441.128	3	0.500	1	-10921639	122.959	122	112	141	11927	6.086	1.821	0.010	0.381
726	ID39436271	39436271	89	0.990	96.023	217.996	0	1921.504	4	0.500	1	-10921639	122.124	121	112	141	11846	6.442	1.595	0.009	0.346
727	ID39273193	39273193	89	1.507	96.732	217.307	0	2401.880	5	0.500	1	-10921639	122.763	122	113	151	11908	7.084	0.490	0.014	0.486
728	ID39348913	39348913	89	1.370	96.871	216.904	0	2882.256	6	0.500	1	-10921639	122.557	120	112	153	11888	6.578	0.706	0.012	0.438
729	ID39137113	39137113	90	1.314	77.818	43.437	0	0.000	0	0.500	1	-10921639	121.134	120	110	144	11750	6.656	0.487	0.012	0.417
730	ID39303321	39303321	90	2.136	79.562	41.866	0	480.376	1	0.500	1	-10921639	123.031	121	109	151	11934	8.672	0.492	0.023	0.646
731	ID39115334	39115334	90	1.811	80.322	41.595	0	960.752	2	0.500	1	-10921639	122.134	121	112	144	11847	7.382	0.490	0.017	0.560
732	ID39287095	39287095	90	1.465	79.506	41.878	0	1441.128	3	0.500	1	-10921639	122.722	121	113	148	11904	6.934	0.479	0.012	0.434
733	ID39359215	39359215	90	1.074	78.580	42.706	0	1921.504	4	0.500	1	-10921639	120.495	120	108	135	11688	5.095	1.602	0.008	0.377
734	ID39112443	39112443	90	1.364	78.881	42.278	0	2401.880	5	0.500	1	-10921639	122.175	121	112	145	11851	6.258	0.487	0.009	0.342
735	ID39196977	39196977	90	1.420	78.819	42.909	0	2882.256	6	0.500	1	-10921639	122.052	122	111	142	11839	6.277	0.707	0.017	0.634
736	ID39092577	39092577	90	0.930	79.076	43.961	0	3362.632	7	0.500	1	-10921639	120.691	120	111	135	11707	5.169	1.783	0.013	0.590
737	ID39290361	39290361	90	1.131	78.324	43.564	0	3843.008	8	0.500	1	-10921639	120.784	120	112	141	11716	5.506	0.489	0.010	0.447
738	ID39081559	39081559	90	0.903	78.954	44.012	0	4323.384	9	0.500	1	-10921639	120.660	120	111	135	11704	5.539	0.705	0.008	0.332
739	ID39133986	39133986	91	1.577	214.498	40.638	0	0.000	0	0.500	1	-10921639	123.093	122	112	146	11940	6.845	1.900	0.018	0.650
740	ID39306468	39306468	91	1.830	213.841	40.637	0	480.376	1	0.500	1	-10921639	122.670	122	111	148	11899	7.628	1.804	0.024	0.753
741	ID39114693	39114693	91	1.732	213.224	41.172	0	960.752	2	0.500	1	-10921639	122.309	121	110	148	11864	7.641	1.900	0.018	0.564
742	ID39287170	39287170	91	1.567	213.493	41.919	0	1441.128	3	0.500	1	-10921639	120.670	119	107	142	11705	7.291	1.790	0.019	0.626
743	ID39364576	39364576	91	2.121	213.910	41.287	0	1921.504	4	0.500	1	-10921639	123.887	122	111	157	12017	9.394	1.806	0.018	0.467
744	ID39124023	39124023	91	1.534	214.299	39.984	0	2401.880	5	0.500	1	-10921639	122.165	121	110	146	11850	6.785	0.482	0.016	0.561
745	ID39201665	39201665	91	1.442	215.248	40.336	0	2882.256	6	0.500	1	-10921639	121.629	120	111	150	11798	6.545	0.486	0.012	0.440
746	ID39095028	39095028	91	1.599	214.468	40.269	0	3362.632	7	0.500	1	-10921639	122.186	120	109	146	11852	7.646	0.487	0.016	0.501
747	ID39290815	39290815	91	1.067	213.814	40.560	0	3843.008	8	0.500	1	-10921639	120.608	119	107	144	11699	6.106	1.591	0.015	0.597
748	ID39078874	39078874	91	0.891	214.442	40.602	0	4323.384	9	0.500	1	-10921639	120.660	120	113	132	11704	5.056	1.585	0.011	0.498
749	ID39123064	39123064	92	1.541	4.743	18.977	0	0.000	0	0.500	1	-10921639	122.206	121	107	143	11854	6.661	0.480	0.015	0.546
750	ID39285601	39285601	92	1.482	5.906	19.650	0	480.376	1	0.500	1	-10921639	122.814	123	110	151	11913	6.192	1.719	0.017	0.651
751	ID39099203	39099203	92	1.761	5.865	18.993	0	960.752	2	0.500	1	-10921639	123.742	122	111	146	12003	7.405	0.488	0.017	0.558
752	ID39244158	39244158	92	0.959	5.497	18.292	0	1441.128	3	0.500	1	-10921639	121.794	121	110	144	11814	6.493	1.807	0.010	0.370
753	ID39347937	39347937	92	1.344	5.800	18.419	0	1921.504	4	0.500	1	-10921639	124.134	124	113	148	12041	7.023	0.484	0.009	0.304
754	ID39093861	39093861	92	1.776	5.889	18.876	0	2401.880	5	0.500	1	-10921639	124.495	123	112	153	12076	7.733	0.706	0.014	0.447
755	ID39172753	39172753	92	2.002	5.722	19.139	0	2882.256	6	0.500	1	-10921639	124.443	123	110	147	12071	7.903	0.494	0.026	0.797
756	ID39082390	39082390	92	0.913	6.767	19.334	0	3362.632	7	0.500	1	-10921639	120.093	119	110	146	11649	5.937	0.485	0.005	0.214
757	ID39082483	39082483	92	1.088	5.794	19.778	0	3362.632	7	0.500	1	-10921639	120.309	120	111	137	11670	5.985	0.491	0.013	0.505
758	ID39264277	39264277	92	1.407	4.358	20.696	0	3843.008	8	0.500	1	-10921639	120.062	119	109	149	11646	7.074	1.900	0.016	0.549
759	ID39263221	39263221	92	1.108	7.268	18.445	0	3843.008	8	0.500	1	-10921639	119.773	119	110	136	11618	6.011	0.484	0.012	0.455
760	ID39074560	39074560	92	1.578	7.824	18.066	0	4323.384	9	0.500	1	-10921639	120.474	119	112	153	11686	6.784	0.484	0.016	0.549
761	ID39074988	39074988	92	1.617	2.941	21.173	0	4323.384	9	0.500	1	-10921639	120.505	119	108	144	11689	7.136	1.900	0.015	0.501
762	ID39139226	39139226	93	1.267	135.771	50.074	0	0.000	0	0.500	1	-10921639	124.113	123	112	142	12039	6.271	1.205	0.008	0.331
763	ID39310397	39310397	93	0.933	136.592	49.635	0	480.376	1	0.500	1	-10921639	121.969	122	113	139	11831	5.001	0.705	0.006	0.272
764	ID39122103	39122103	93	1.512	136.378	49.887	0	960.752	2	0.500	1	-10921639	123.443	122	112	141	11974	6.647	1.900	0.019	0.701
765	ID39290055	39290055	93	1.553	136.610	49.637	0	1441.128	3	0.500	1	-10921639	124.433	124	111	173	12070	8.178	0.474	0.012	0.359
766	ID39372770	39372770	93	0.917	136.751	49.761	0	1921.504	4	0.500	1	-10921639	122.216	122	110	143	11855	6.044	0.488	0.009	0.355
767	ID39126471	39126471	93	1.620	136.688	49.669	0	2401.880	5	0.500	1	-10921639	125.649	125	112	155	12188	8.078	0.720	0.019	0.584
768	ID39097900	39097900	93	1.319	136.841	49.949	0	3362.632	7	0.500	1	-10921639	124.227	123	113	175	12050	8.570	0.715	0.013	0.385
769	ID39297648	39297648	93	1.616	136.863	50.516	0	3843.008	8	0.500	1	-10921639	124.155	123	112	152	12043	7.082	1.900	0.015	0.511
770	ID39082207	39082207	93	1.394	136.564	50.148	0	4323.384	9	0.500	1	-10921639	124.371	124	114	160	12064	7.707	0.489	0.011	0.354
771	ID39223238	39223238	94	1.419	23.690	155.758	0	0.000	0	0.500	1	-10921639	121.412	120	109	152	11777	6.543	0.488	0.011	0.418
772	ID39400245	39400245	94	1.517	24.459	155.319	0	480.376	1	0.500	1	-10921639	122.072	121	110	145	11841	6.792	1.900	0.007	0.263
773	ID39229291	39229291	94	1.394	23.827	155.534	0	960.752	2	0.500	1	-10921639	121.784	121	112	141	11813	5.765	1.797	0.013	0.545
774	ID39371197	39371197	94	0.965	24.370	155.013	0	1441.128	3	0.500	1	-10921639	120.526	120	110	138	11691	5.775	1.900	0.009	0.369
775	ID39422946	39422946	94	1.053	23.638	155.723	0	1921.504	4	0.500	1	-10921639	120.629	120	110	136	11701	5.572	1.402	0.006	0.273
776	ID39215940	39215940	94	1.265	20.889	157.396	0	2401.880	5	0.500	1	-10921639	121.052	120	109	146	11742	6.537	1.900	0.015	0.554
777	ID39311106	39311106	94	1.097	20.485	157.349	0	2882.256	6	0.500	1	-10921639	119.814	120	107	133	11622	5.799	1.780	0.012	0.510
778	ID39176068	39176068	94	1.252	21.034	157.707	0	3362.632	7	0.500	1	-10921639	120.536	120	111	146	11692	5.906	0.478	0.010	0.417
779	ID39370975	39370975	94	1.307	20.771	157.835	0	3843.008	8	0.500	1	-10921639	120.629	119	109	140	11701	6.027	1.900	0.015	0.573
780	ID39133739	39133739	95	0.970	69.361	39.824	0	0.000	0	0.500	1	-10921639	121.649	121	112	139	11800	5.712	1.900	0.007	0.308
781	ID39306084	39306084	95	1.080	70.331	40.202	0	480.376	1	0.500	1	-10921639	120.794	120	111	133	11717	5.093	1.803	0.012	0.570
782	ID39114383	39114383	95	1.013	70.708	39.296	0	960.752	2	0.500	1	-10921639	121.619	121	112	143	11797	5.411	1.593	0.008	0.359
783	ID39280745	39280745	95	1.525	69.937	39.254	0	1441.128	3	0.500	1	-10921639	122.845	122	113	159	11916	6.861	0.489	0.016	0.555
784	ID39357924	39357924	95	1.557	70.123	39.319	0	1921.504	4	0.500	1	-10921639	122.619	121	111	142	11894	6.595	0.486	0.018	0.652
785	ID39109717	39109717	95	1.125	70.378	39.247	0	2401.880	5	0.500	1	-10921639	123.289	123	114	145	11959	5.564	0.487	0.012	0.520
786	ID39094777	39094777	95	1.064	69.838	39.424	0	3362.632	7	0.500	1	-10921639	121.773	121	110	138	11812	5.658	1.751	0.011	0.471
787	ID39292547	39292547	95	0.972	69.936	39.324	0	3843.008	8	0.500	1	-10921639	120.670	120	109	156	11705	6.072	1.900	0.013	0.510
788	ID39419547	39419547	96	0.933	126.339	141.555	0	1921.504	4	0.500	1	-10921639	128.464	128	115	153	12461	6.237	1.900	0.008	0.326
789	ID39192597	39192597	96	1.158	126.019	141.648	0	2401.880	5	0.500	1	-10921639	129.289	129	114	166	12541	8.218	0.711	0.013	0.391
790	ID39300133	39300133	96	1.112	126.629	140.521	0	2882.256	6	0.500	1	-10921639	127.412	127	111	143	12359	6.334	1.683	0.012	0.494
791	ID39295625	39295625	96	1.067	126.044	141.729	0	2882.256	6	0.500	1	-10921639	130.711	130	115	156	12679	7.805	1.900	0.007	0.247
792	ID39161056	39161056	96	0.989	126.951	140.537	0	3362.632	7	0.500	1	-10921639	129.897	130	114	148	12600	6.606	1.834	0.011	0.422
793	ID39166473	39166473	96	1.230	126.004	141.535	0	3362.632	7	0.500	1	-10921639	131.959	132	117	153	12800	7.270	1.900	0.011	0.387
794	ID39361437	39361437	96	1.244	126.652	140.850	0	3843.008	8	0.500	1	-10921639	130.474	130	115	153	12656	6.994	1.900	0.007	0.277
795	ID39362916	39362916	96	1.477	126.070	141.989	0	3843.008	8	0.500	1	-10921639	133.773	133	121	170	12976	7.579	1.786	0.008	0.272
796	ID39185910	39185910	96	1.324	126.075	142.299	0	4323.384	9	0.500	1	-10921639	135.505	134	118	163	13144	7.084	1.675	0.006	0.212
797	ID39185288	39185288	96	1.293	125.939	141.911	0	4323.384	9	0.500	1	-10921639	135.639	135	121	163	13157	7.296	1.626	0.008	0.283
798	ID39156219	39156219	97	1.509	212.619	70.747	0	0.000	0	0.500	1	-10921639	123.670	123	111	139	11996	6.339	1.597	0.013	0.489
799	ID39327713	39327713	97	1.373	213.602	70.329	0	480.376	1	0.500	1	-10921639	122.412	122	111	141	11874	5.839	1.900	0.012	0.480
800	ID39135260	39135260	97	1.504	213.613	70.391	0	960.752	2	0.500	1	-10921639	123.485	124	112	145	11978	6.556	0.710	0.021	0.760
801	ID39309117	39309117	97	1.790	213.634	70.355	0	1441.128	3	0.500	1	-10921639	124.103	123	112	146	12038	7.026	1.900	0.015	0.538
802	ID39381403	39381403	97	1.091	213.831	70.492	0	1921.504	4	0.500	1	-10921639	121.216	120	111	141	11758	6.526	1.784	0.010	0.351
803	ID39134628	39134628	97	0.931	213.243	70.666	0	2401.880	5	0.500	1	-10921639	121.608	120	111	137	11796	5.709	1.742	0.011	0.469
804	ID39231661	39231661	97	1.389	213.410	70.894	0	2882.256	6	0.500	1	-10921639	122.649	122	113	142	11897	6.124	0.492	0.013	0.532
805	ID39105970	39105970	97	1.029	213.111	70.786	0	3362.632	7	0.500	1	-10921639	120.577	119	109	137	11696	5.914	1.900	0.011	0.460
806	ID39105688	39105688	97	1.006	214.047	70.488	0	3362.632	7	0.500	1	-10921639	121.577	121	111	148	11793	6.375	1.001	0.013	0.500
807	ID39314463	39314463	97	1.156	213.979	70.736	0	3843.008	8	0.500	1	-10921639	121.928	121	111	151	11827	6.871	1.900	0.006	0.218
808	ID39314218	39314218	97	0.977	212.828	71.099	0	3843.008	8	0.500	1	-10921639	119.959	119	107	144	11636	5.845	1.805	0.010	0.402
809	ID39098737	39098737	97	1.116	212.428	71.220	0	4323.384	9	0.500	1	-10921639	119.649	119	106	146	11606	6.180	0.490	0.010	0.365
810	ID39094150	39094150	97	0.986	213.897	70.537	0	4323.384	9	0.500	1	-10921639	120.423	119	111	141	11681	5.838	1.790	0.010	0.391
811	ID39140246	39140246	98	1.378	13.430	71.678	0	960.752	2	0.500	1	-10921639	121.041	120	111	153	11741	6.469	1.900	0.011	0.420
812	ID39314809	39314809	98	1.060	13.766	71.405	0	1441.128	3	0.500	1	-10921639	120.371	120	110	138	11676	5.849	1.900	0.009	0.357
813	ID39383454	39383454	98	1.157	14.332	72.040	0	1921.504	4	0.500	1	-10921639	120.680	120	111	140	11706	5.580	0.494	0.013	0.538
814	ID39135752	39135752	98	1.377	14.287	72.290	0	2401.880	5	0.500	1	-10921639	120.938	120	110	146	11731	6.578	1.900	0.017	0.604
815	ID39111925	39111925	98	1.380	14.241	72.412	0	3362.632	7	0.500	1	-10921639	122.082	121	110	139	11842	6.120	1.900	0.014	0.556
816	ID39316431	39316431	98	1.007	14.083	72.814	0	3843.008	8	0.500	1	-10921639	120.206	119	110	142	11660	5.704	1.900	0.009	0.380
817	ID39097036	39097036	98	1.228	13.411	72.593	0	4323.384	9	0.500	1	-10921639	121.186	120	109	138	11755	5.947	1.791	0.015	0.614
818	ID39266301	39266301	99	1.363	1.470	199.856	0	0.000	0	0.500	1	-10921639	121.351	120	111	147	11771	6.888	1.900	0.018	0.616
819	ID39420898	39420898	99	1.402	1.936	199.180	0	480.376	1	0.500	1	-10921639	120.990	120	107	151	11736	7.007	1.900	0.018	0.620
820	ID39286977	39286977	99	1.286	2.254	199.643	0	960.752	2	0.500	1	-10921639	121.113	120	111	148	11748	7.053	1.584	0.013	0.457
821	ID39395355	39395355	99	0.897	2.280	199.506	0	1441.128	3	0.500	1	-10921639	120.969	120	110	139	11734	5.691	1.821	0.007	0.290
822	ID39395692	39395692	99	1.015	0.586	200.069	0	1441.128	3	0.500	1	-10921639	121.351	121	110	140	11771	5.820	1.900	0.015	0.600
823	ID39434831	39434831	99	0.945	2.722	199.861	0	1921.504	4	0.500	1	-10921639	120.990	121	111	141	11736	5.465	1.814	0.011	0.469
824	ID39434899	39434899	99	2.231	0.000	200.308	0	1921.504	4	0.500	1	-10921639	113.876	117	47	156	11046	21.708	1.792	0.065	0.641
825	ID39254495	39254495	99	1.395	0.000	200.417	0	2401.880	5	0.500	1	-10921639	113.670	119	48	140	11026	20.037	1.794	0.050	0.543
826	ID39340072	39340072	99	0.914	2.210	200.168	0	2882.256	6	0.500	1	-10921639	120.670	120	109	135	11705	5.733	1.900	0.014	0.584
827	ID39223869	39223869	99	0.891	1.954	198.961	0	3362.632	7	0.500	1	-10921639	120.536	120	109	159	11692	6.392	1.900	0.012	0.447
828	ID39398228	39398228	99	0.899	0.000	201.283	0	3843.008	8	0.500	1	-10921639	111.082	117	47	142	10775	19.656	1.785	0.048	0.513
829	ID39252737	39252737	99	0.931	2.185	200.563	0	4323.384	9	0.500	1	-10921639	120.680	121	106	134	11706	5.671	1.665	0.009	0.366
830	ID39216577	39216577	100	1.072	106.424	145.663	0	960.752	2	0.500	1	-10921639	120.381	119	110	141	11677	6.462	1.900	0.012	0.424
831	ID39362988	39362988	100	1.180	103.871	146.686	0	1441.128	3	0.500	1	-10921639	119.557	118	109	144	11597	6.374	1.900	0.013	0.480
832	ID39421589	39421589	100	1.521	103.979	146.551	0	1921.504	4	0.500	1	-10921639	122.340	121	111	144	11867	6.922	1.729	0.014	0.472
833	ID39209474	39209474	100	1.089	104.146	146.970	0	2401.880	5	0.500	1	-10921639	120.175	120	108	140	11657	6.175	0.493	0.016	0.618
834	ID39171656	39171656	100	0.923	104.664	146.999	0	3362.632	7	0.500	1	-10921639	119.371	118	109	138	11579	6.063	1.605	0.011	0.432
835	ID39366532	39366532	100	0.999	105.443	147.122	0	3843.008	8	0.500	1	-10921639	119.639	120	110	135	11605	5.652	1.900	0.018	0.732
836	ID39110380	39110380	101	1.454	215.841	2.891	0	0.000	0	0.500	1	-10921639	122.526	122	110	143	11885	6.143	1.392	0.012	0.458
837	ID39268004	39268004	101	1.219	216.336	3.018	0	480.376	1	0.500	1	-10921639	121.206	120	110	151	11757	6.519	1.405	0.009	0.322
838	ID39088538	39088538	101	1.325	216.769	2.845	0	960.752	2	0.500	1	-10921639	121.464	120	109	146	11782	6.782	0.489	0.013	0.442
839	ID39224409	39224409	101	1.689	216.476	2.931	0	1441.128	3	0.500	1	-10921639	123.041	122	112	143	11935	6.834	1.721	0.014	0.508
840	ID39331991	39331991	101	1.326	216.446	3.486	0	1921.504	4	0.500	1	-10921639	123.196	123	110	141	11950	5.767	1.393	0.010	0.430
841	ID39086094	39086094	101	1.694	216.597	2.975	0	2401.880	5	0.500	1	-10921639	122.268	120	109	147	11860	7.778	0.483	0.017	0.517
842	ID39161818	39161818	101	1.222	216.594	3.461	0	2882.256	6	0.500	1	-10921639	122.598	122	112	154	11892	6.539	1.804	0.012	0.436
843	ID39079289	39079289	101	0.901	216.484	3.303	0	3362.632	7	0.500	1	-10921639	120.619	120	109	143	11700	6.025	1.900	0.009	0.369
844	ID39244839	39244839	101	0.888	217.209	3.876	0	3843.008	8	0.500	1	-10921639	121.959	121	111	138	11830	5.813	1.397	0.008	0.331
845	ID39244004	39244004	101	1.073	216.699	3.501	0	3843.008	8	0.500	1	-10921639	121.753	121	110	140	11810	6.090	1.799	0.008	0.300
846	ID39071812	39071812	101	1.022	216.485	3.413	0	4323.384	9	0.500	1	-10921639	120.794	120	109	141	11717	5.900	1.900	0.010	0.425
847	ID39071899	39071899	101	0.918	217.230	4.047	0	4323.384	9	0.500	1	-10921639	120.928	120	109	139	11730	6.338	0.492	0.011	0.422
848	ID39406424	39406424	102	1.496	116.230	161.177	0	480.376	1	0.500	1	-10921639	122.784	121	113	151	11910	7.126	0.488	0.010	0.335
849	ID39234621	39234621	102	2.241	114.428	160.765	0	960.752	2	0.500	1	-10921639	124.072	122	111	147	12035	8.844	0.481	0.022	0.614
850	ID39374304	39374304	102	1.408	115.378	160.439	0	1441.128	3	0.500	1	-10921639	122.485	121	112	146	11881	6.836	0.488	0.009	0.316
851	ID39424139	39424139	102	1.099	115.526	161.074	0	1921.504	4	0.500	1	-10921639	121.320	120	111	139	11768	5.945	1.900	0.013	0.510
852	ID39212187	39212187	102	1.561	116.117	160.973	0	2401.880	5	0.500	1	-10921639	122.701	121	112	149	11902	7.077	1.605	0.016	0.543
853	ID39312035	39312035	102	1.500	116.056	160.520	0	2882.256	6	0.500	1	-10921639	123.072	122	111	140	11938	6.496	1.900	0.018	0.660
854	ID39185174	39185174	102	1.243	116.271	161.157	0	3362.632	7	0.500	1	-10921639	122.175	122	111	142	11851	5.955	0.481	0.009	0.383
855	ID39373121	39373121	102	1.077	115.549	161.319	0	3843.008	8	0.500	1	-10921639	121.526	121	110	154	11788	6.605	0.480	0.010	0.355
856	ID39269983	39269983	103	1.806	187.448	205.714	0	0.000	0	0.500	1	-10921639	124.454	123	113	144	12072	7.165	0.704	0.017	0.582
857	ID39424178	39424178	103	1.653	188.201	205.155	0	480.376	1	0.500	1	-10921639	124.742	123	113	143	12100	6.974	1.900	0.018	0.624
858	ID39295989	39295989	103	1.308	187.975	204.612	0	960.752	2	0.500	1	-10921639	122.670	122	111	142	11899	6.399	0.495	0.013	0.479
859	ID39398265	39398265	103	1.385	188.213	204.531	0	1441.128	3	0.500	1	-10921639	124.186	123	114	144	12046	6.133	0.483	0.013	0.514
860	ID39434381	39434381	103	1.591	187.854	205.005	0	1921.504	4	0.500	1	-10921639	125.206	124	111	153	12145	7.343	0.488	0.021	0.704
861	ID39268014	39268014	103	1.223	188.146	205.123	0	2401.880	5	0.500	1	-10921639	123.454	123	113	137	11975	5.884	1.622	0.011	0.447
862	ID39336952	39336952	103	1.090	187.833	205.491	0	2882.256	6	0.500	1	-10921639	123.423	123	114	141	11972	5.536	1.796	0.009	0.399
863	ID39222167	39222167	103	1.300	187.924	205.233	0	3362.632	7	0.500	1	-10921639	124.495	124	110	144	12076	5.877	1.900	0.016	0.680
864	ID39400225	39400225	103	1.378	188.014	204.394	0	3843.008	8	0.500	1	-10921639	123.454	123	112	146	11975	6.470	0.480	0.014	0.517
865	ID39260484	39260484	103	1.241	187.843	204.568	0	4323.384	9	0.500	1	-10921639	123.206	122	109	144	11951	6.557	1.794	0.010	0.380
866	ID39382245	39382245	104	1.348	97.754	177.828	0	1441.128	3	0.500	1	-10921639	122.866	122	113	146	11918	6.194	1.900	0.017	0.659
867	ID39428996	39428996	104	1.319	98.038	177.950	0	1921.504	4	0.500	1	-10921639	122.278	122	111	147	11861	6.110	0.479	0.012	0.490
868	ID39228012	39228012	104	1.602	97.845	178.228	0	2401.880	5	0.500	1	-10921639	123.423	122	111	146	11972	6.877	1.900	0.017	0.607
869	ID39318804	39318804	104	1.096	97.128	178.337	0	2882.256	6	0.500	1	-10921639	122.763	123	112	143	11908	5.937	1.565	0.013	0.526
870	ID39202370	39202370	104	1.309	97.372	178.141	0	3362.632	7	0.500	1	-10921639	123.227	122	112	147	11953	6.317	1.786	0.013	0.511
871	ID39383248	39383248	104	0.972	97.328	178.484	0	3843.008	8	0.500	1	-10921639	121.691	121	111	134	11804	4.978	1.900	0.010	0.497
872	ID39218036	39218036	104	1.174	96.865	178.291	0	4323.384	9	0.500	1	-10921639	122.608	121	110	147	11893	6.825	1.801	0.015	0.539
873	ID39260367	39260367	105	1.268	57.182	192.699	0	0.000	0	0.500	1	-10921639	123.918	123	113	147	12020	5.798	0.490	0.012	0.503
874	ID39420549	39420549	105	1.078	57.775	191.974	0	480.376	1	0.500	1	-10921639	121.309	121	110	135	11767	5.559	0.493	0.016	0.685
875	ID39282291	39282291	105	1.491	58.197	192.208	0	960.752	2	0.500	1	-10921639	122.526	121	112	149	11885	6.767	0.490	0.016	0.574
876	ID39392082	39392082	105	1.511	58.056	193.777	0	1441.128	3	0.500	1	-10921639	122.691	121	111	152	11901	7.503	0.716	0.013	0.416
877	ID39432123	39432123	105	1.530	58.155	193.083	0	1921.504	4	0.500	1	-10921639	123.072	122	111	153	11938	7.452	0.486	0.016	0.508
878	ID39247278	39247278	105	1.197	58.744	193.041	0	2401.880	5	0.500	1	-10921639	123.113	122	113	141	11942	5.802	1.900	0.012	0.518
879	ID39213131	39213131	105	0.932	60.750	191.207	0	3362.632	7	0.500	1	-10921639	122.000	121	110	139	11834	5.659	1.808	0.007	0.316
880	ID39390857	39390857	105	1.043	59.923	191.200	0	3843.008	8	0.500	1	-10921639	121.237	121	109	139	11760	5.805	1.900	0.015	0.601
881	ID39234563	39234563	105	1.030	58.902	193.080	0	4323.384	9	0.500	1	-10921639	120.495	119	109	153	11688	6.537	1.796	0.013	0.475
882	ID39195777	39195777	106	1.184	84.718	118.873	0	0.000	0	0.500	1	-10921639	122.000	121	111	144	11834	5.886	0.496	0.008	0.340
883	ID39375191	39375191	106	1.144	85.278	118.724	0	480.376	1	0.500	1	-10921639	122.258	122	109	147	11859	6.280	1.900	0.008	0.303
884	ID39183561	39183561	106	1.778	85.786	118.842	0	960.752	2	0.500	1	-10921639	122.763	121	112	151	11908	7.486	0.493	0.018	0.569
885	ID39350980	39350980	106	1.092	84.949	118.383	0	1441.128	3	0.500	1	-10921639	120.938	120	109	142	11731	6.346	1.801	0.012	0.441
886	ID39412413	39412413	106	0.905	85.792	118.559	0	1921.504	4	0.500	1	-10921639	120.361	120	109	142	11675	5.609	1.611	0.008	0.357
887	ID39171581	39171581	106	1.165	85.317	118.522	0	2401.880	5	0.500	1	-10921639	120.773	120	110	137	11715	5.488	1.590	0.011	0.486
888	ID39285335	39285335	106	0.963	85.215	118.879	0	2882.256	6	0.500	1	-10921639	120.773	119	108	138	11715	6.584	1.638	0.008	0.307
889	ID39402392	39402392	107	0.887	205.021	210.308	0	1441.128	3	0.500	1	-10921639	120.619	119	109	149	11700	6.741	0.489	0.011	0.373
890	ID39435697	39435697	107	1.045	204.857	209.727	0	1921.504	4	0.500	1	-10921639	121.247	121	111	138	11761	5.266	1.900	0.006	0.278
891	ID39260260	39260260	107	1.353	204.151	209.294	0	2401.880	5	0.500	1	-10921639	121.052	120	108	144	11742	6.659	0.490	0.018	0.657
892	ID39345201	39345201	107	1.284	203.503	208.918	0	2882.256	6	0.500	1	-10921639	120.402	119	109	141	11679	6.695	1.775	0.017	0.599
893	ID39234022	39234022	107	1.283	204.120	209.421	0	3362.632	7	0.500	1	-10921639	121.216	120	110	143	11758	6.382	1.798	0.016	0.594
894	ID39403188	39403188	107	0.952	204.738	210.869	0	3843.008	8	0.500	1	-10921639	121.320	121	110	141	11768	6.085	1.900	0.010	0.411
895	ID39270350	39270350	107	0.906	204.794	210.483	0	4323.384	9	0.500	1	-10921639	120.165	120	109	136	11656	5.291	1.600	0.012	0.544
896	ID39213096	39213096	108	1.390	53.266	144.206	0	960.752	2	0.500	1	-10921639	121.031	120	110	142	11740	6.080	1.900	0.013	0.516
897	ID39365655	39365655	108	1.666	52.724	144.306	0	1441.128	3	0.500	1	-10921639	121.794	120	110	147	11814	7.551	0.489	0.022	0.701
898	ID39419827	39419827	108	1.356	53.152	143.884	0	1921.504	4	0.500	1	-10921639	121.485	120	110	141	11784	6.380	1.601	0.014	0.541
899	ID39197715	39197715	108	1.316	53.142	145.099	0	2401.880	5	0.500	1	-10921639	122.186	121	111	149	11852	6.960	0.493	0.015	0.514
900	ID39301308	39301308	108	0.920	52.652	145.024	0	2882.256	6	0.500	1	-10921639	120.381	120	111	137	11677	5.449	0.466	0.014	0.607
901	ID39167624	39167624	108	0.945	51.658	144.459	0	3362.632	7	0.500	1	-10921639	120.485	120	111	173	11687	7.233	0.465	0.009	0.304
902	ID39366138	39366138	108	1.038	51.583	144.719	0	3843.008	8	0.500	1	-10921639	121.402	121	109	154	11776	6.176	0.494	0.007	0.285
903	ID39187999	39187999	108	0.876	51.390	145.534	0	4323.384	9	0.500	1	-10921639	122.041	121	113	143	11838	5.281	0.710	0.011	0.495
904	ID39259994	39259994	109	1.096	55.929	176.681	0	960.752	2	0.500	1	-10921639	120.897	121	112	133	11727	5.179	1.828	0.010	0.456
905	ID39381180	39381180	109	0.904	56.335	176.117	0	1441.128	3	0.500	1	-10921639	120.206	120	110	134	11660	5.127	0.702	0.007	0.333
906	ID39430066	39430066	109	1.075	56.578	175.405	0	1921.504	4	0.500	1	-10921639	120.113	119	111	141	11651	5.775	0.475	0.013	0.551
907	ID39222663	39222663	109	1.333	56.451	175.232	0	2401.880	5	0.500	1	-10921639	120.876	120	111	159	11725	7.174	1.900	0.011	0.376
908	ID39109704	39109704	110	1.137	213.264	1.847	0	0.000	0	0.500	1	-10921639	121.371	121	107	142	11773	6.420	1.606	0.014	0.514
909	ID39272214	39272214	110	1.853	214.523	1.738	0	480.376	1	0.500	1	-10921639	123.165	122	112	153	11947	7.932	1.602	0.021	0.651
910	ID39087859	39087859	110	1.527	213.531	1.471	0	960.752	2	0.500	1	-10921639	122.052	121	110	152	11839	7.306	1.411	0.019	0.618
911	ID39222589	39222589	110	1.723	213.629	1.868	0	1441.128	3	0.500	1	-10921639	121.835	121	110	148	11818	7.145	0.485	0.021	0.702
912	ID39328436	39328436	110	1.446	214.430	1.395	0	1921.504	4	0.500	1	-10921639	121.423	121	110	148	11778	6.880	0.711	0.016	0.565
913	ID39085384	39085384	110	1.402	214.482	1.926	0	2401.880	5	0.500	1	-10921639	121.309	121	111	141	11767	6.449	0.481	0.009	0.336
914	ID39165127	39165127	110	1.112	213.891	2.409	0	2882.256	6	0.500	1	-10921639	121.124	120	112	141	11749	5.674	1.900	0.012	0.494
915	ID39078627	39078627	110	1.050	214.366	2.380	0	3362.632	7	0.500	1	-10921639	120.268	119	109	140	11666	6.060	1.785	0.007	0.280
916	ID39239307	39239307	110	1.367	214.428	2.826	0	3843.008	8	0.500	1	-10921639	120.907	120	107	134	11728	6.423	1.597	0.022	0.814
917	ID39072151	39072151	110	1.330	213.748	2.347	0	4323.384	9	0.500	1	-10921639	120.845	120	109	144	11722	6.244	1.900	0.015	0.564
918	ID39141286	39141286	111	1.266	35.038	45.085	0	0.000	0	0.500	1	-10921639	121.485	120	110	150	11784	7.070	1.900	0.018	0.624
919	ID39311350	39311350	111	1.355	36.343	44.460	0	480.376	1	0.500	1	-10921639	122.876	122	110	152	11919	6.732	0.491	0.014	0.512
920	ID39118649	39118649	111	0.986	36.349	44.400	0	960.752	2	0.500	1	-10921639	121.711	120	112	142	11806	5.831	1.900	0.008	0.336
921	ID39287902	39287902	111	1.045	36.618	44.216	0	1441.128	3	0.500	1	-10921639	122.175	121	112	144	11851	6.621	1.658	0.006	0.237
922	ID39365559	39365559	111	1.572	36.594	44.201	0	1921.504	4	0.500	1	-10921639	123.814	122	109	148	12010	7.888	1.803	0.017	0.511
923	ID39114645	39114645	111	0.940	36.817	44.409	0	2401.880	5	0.500	1	-10921639	122.454	121	112	148	11878	7.213	1.712	0.007	0.226
924	ID39199682	39199682	111	0.982	36.742	44.494	0	2882.256	6	0.500	1	-10921639	122.289	121	110	142	11862	6.310	1.783	0.008	0.323
925	ID39093892	39093892	111	1.126	36.926	44.266	0	3362.632	7	0.500	1	-10921639	122.433	121	113	138	11876	6.040	1.837	0.012	0.492
926	ID39294877	39294877	111	1.213	37.847	43.704	0	3843.008	8	0.500	1	-10921639	121.619	121	111	141	11797	5.940	1.900	0.011	0.441
927	ID39080618	39080618	111	1.199	38.717	43.257	0	4323.384	9	0.500	1	-10921639	121.021	120	109	142	11739	7.131	1.609	0.015	0.504
928	ID39436982	39436982	112	1.150	10.930	220.744	0	1921.504	4	0.500	1	-10921639	121.041	121	110	153	11741	6.429	1.821	0.012	0.451
929	ID39275661	39275661	112	1.585	10.628	220.810	0	2401.880	5	0.500	1	-10921639	122.619	121	110	173	11894	8.784	1.900	0.020	0.542
930	ID39347004	39347004	112	1.493	10.725	221.325	0	2882.256	6	0.500	1	-10921639	115.474	122	48	147	11201	19.936	1.792	0.054	0.597
931	ID39240376	39240376	112	1.019	10.927	220.768	0	3362.632	7	0.500	1	-10921639	120.000	119	111	143	11640	6.178	1.900	0.007	0.254
932	ID39408534	39408534	112	1.030	10.833	221.325	0	3843.008	8	0.500	1	-10921639	112.598	118	48	141	10922	19.477	1.790	0.041	0.451
933	ID39272693	39272693	112	0.916	10.436	220.412	0	4323.384	9	0.500	1	-10921639	119.845	118	107	140	11625	5.772	1.609	0.010	0.425
934	ID39175434	39175434	113	0.889	40.249	97.790	0	0.000	0	0.500	1	-10921639	120.062	119	108	141	11646	5.522	1.776	0.010	0.425
935	ID39354143	39354143	113	1.249	42.119	97.145	0	480.376	1	0.500	1	-10921639	121.268	121	110	134	11763	5.488	0.715	0.014	0.596
936	ID39328988	39328988	113	0.997	41.636	97.265	0	1441.128	3	0.500	1	-10921639	120.588	120	109	146	11697	5.642	1.828	0.011	0.452
937	ID39404969	39404969	113	1.375	42.172	97.063	0	1921.504	4	0.500	1	-10921639	121.351	120	108	144	11771	6.449	0.472	0.012	0.431
938	ID39154789	39154789	113	1.491	42.255	97.235	0	2401.880	5	0.500	1	-10921639	122.052	121	109	142	11839	7.041	0.485	0.012	0.408
939	ID39251348	39251348	113	1.347	42.107	97.483	0	2882.256	6	0.500	1	-10921639	121.608	120	110	148	11796	6.568	0.476	0.014	0.511
940	ID39128909	39128909	113	1.033	42.349	97.711	0	3362.632	7	0.500	1	-10921639	120.474	120	106	141	11686	5.801	1.396	0.011	0.451
941	ID39115155	39115155	114	0.897	19.558	6.806	0	0.000	0	0.500	1	-10921639	121.948	121	108	141	11829	6.020	1.795	0.008	0.324
942	ID39270023	39270023	114	1.493	20.565	6.419	0	480.376	1	0.500	1	-10921639	123.876	123	112	152	12016	7.303	0.706	0.017	0.560
943	ID39239786	39239786	114	1.032	21.020	5.936	0	1441.128	3	0.500	1	-10921639	121.299	120	112	145	11766	5.705	0.703	0.013	0.534
944	ID39334059	39334059	114	1.437	21.214	6.234	0	1921.504	4	0.500	1	-10921639	122.299	121	112	154	11863	7.194	0.706	0.013	0.434
945	ID39094922	39094922	114	0.894	21.415	6.182	0	2401.880	5	0.500	1	-10921639	120.680	120	111	142	11706	5.784	1.900	0.009	0.383
946	ID39174445	39174445	114	0.940	21.266	6.097	0	2882.256	6	0.500	1	-10921639	121.732	121	113	138	11808	4.974	1.636	0.010	0.463
947	ID39081313	39081313	114	1.219	20.090	6.083	0	3362.632	7	0.500	1	-10921639	121.227	121	112	140	11759	5.505	1.794	0.007	0.327
948	ID39081379	39081379	114	0.963	21.777	6.307	0	3362.632	7	0.500	1	-10921639	120.557	120	110	136	11694	5.174	1.900	0.006	0.266
949	ID39240534	39240534	114	1.171	23.334	6.399	0	3843.008	8	0.500	1	-10921639	120.186	119	108	138	11658	6.537	0.491	0.013	0.482
950	ID39241043	39241043	114	1.293	19.709	6.257	0	3843.008	8	0.500	1	-10921639	119.907	118	107	149	11631	7.031	0.488	0.014	0.479
951	ID39073334	39073334	114	1.479	24.311	5.014	0	4323.384	9	0.500	1	-10921639	121.278	120	111	152	11764	6.905	0.489	0.015	0.506
952	ID39073023	39073023	114	1.109	17.945	7.588	0	4323.384	9	0.500	1	-10921639	119.144	118	107	148	11557	6.328	0.702	0.014	0.531
953	ID39230882	39230882	115	1.490	67.364	159.484	0	0.000	0	0.500	1	-10921639	121.320	120	109	142	11768	6.712	1.900	0.020	0.707
954	ID39408100	39408100	115	1.654	67.542	160.005	0	480.376	1	0.500	1	-10921639	123.495	122	110	150	11979	7.221	1.900	0.019	0.647
955	ID39236895	39236895	115	1.645	68.194	159.064	0	960.752	2	0.500	1	-10921639	123.567	123	109	150	11986	7.274	0.710	0.016	0.525
956	ID39426474	39426474	115	0.877	68.850	159.193	0	1921.504	4	0.500	1	-10921639	120.052	120	107	142	11645	5.611	1.713	0.010	0.404
957	ID39211059	39211059	115	1.105	68.410	159.536	0	2401.880	5	0.500	1	-10921639	120.959	121	111	142	11733	5.728	1.633	0.012	0.510
958	ID39311723	39311723	115	1.135	68.608	159.965	0	2882.256	6	0.500	1	-10921639	121.619	121	110	141	11797	6.020	1.621	0.013	0.512
959	ID39183767	39183767	115	1.200	68.851	159.606	0	3362.632	7	0.500	1	-10921639	121.340	120	110	146	11770	6.183	0.492	0.010	0.407
960	ID39375097	39375097	115	0.894	68.845	159.973	0	3843.008	8	0.500	1	-10921639	119.464	118	108	135	11588	5.515	1.900	0.009	0.376
961	ID39230948	39230948	116	1.298	25.640	159.524	0	0.000	0	0.500	1	-10921639	120.887	120	111	145	11726	6.374	1.780	0.011	0.419
962	ID39405709	39405709	116	1.315	25.753	158.772	0	480.376	1	0.500	1	-10921639	120.082	119	108	141	11648	6.834	0.494	0.013	0.441
963	ID39236174	39236174	116	0.992	26.161	158.744	0	960.752	2	0.500	1	-10921639	119.485	119	112	139	11590	5.230	1.900	0.012	0.557
964	ID39370126	39370126	116	0.984	25.761	158.546	0	1441.128	3	0.500	1	-10921639	120.320	120	110	149	11671	5.318	1.198	0.002	0.094
965	ID39426209	39426209	116	1.108	25.895	158.259	0	1921.504	4	0.500	1	-10921639	119.629	119	109	142	11604	6.150	1.900	0.010	0.381
966	ID39206845	39206845	116	1.192	25.765	158.076	0	2401.880	5	0.500	1	-10921639	120.598	120	110	149	11698	6.110	1.809	0.010	0.390
967	ID39305938	39305938	116	1.172	23.473	155.147	0	2882.256	6	0.500	1	-10921639	121.237	121	112	151	11760	6.240	1.684	0.009	0.341
968	ID39178089	39178089	116	1.199	23.617	155.280	0	3362.632	7	0.500	1	-10921639	121.216	120	111	139	11758	6.100	0.492	0.012	0.457
969	ID39371618	39371618	116	1.028	23.384	155.814	0	3843.008	8	0.500	1	-10921639	121.340	120	112	135	11770	5.346	1.799	0.007	0.311
970	ID39198882	39198882	116	1.251	22.927	155.688	0	4323.384	9	0.500	1	-10921639	121.732	120	111	147	11808	6.669	0.489	0.008	0.281
971	ID39212434	39212434	117	1.607	127.843	143.139	0	0.000	0	0.500	1	-10921639	121.351	120	110	143	11771	7.264	0.485	0.017	0.569
972	ID39396954	39396954	117	1.253	128.719	143.473	0	480.376	1	0.500	1	-10921639	122.660	122	113	142	11898	5.507	1.592	0.009	0.412
973	ID39213149	39213149	117	1.158	128.694	144.211	0	960.752	2	0.500	1	-10921639	122.186	121	111	145	11852	5.568	0.492	0.009	0.405
974	ID39365059	39365059	117	1.221	128.840	143.609	0	1441.128	3	0.500	1	-10921639	122.536	122	113	142	11886	6.064	1.800	0.006	0.259
975	ID39419808	39419808	117	1.534	128.932	143.779	0	1921.504	4	0.500	1	-10921639	122.485	121	110	149	11881	6.608	0.495	0.016	0.576
976	ID39196621	39196621	117	1.501	128.729	143.974	0	2401.880	5	0.500	1	-10921639	123.464	123	112	146	11976	6.636	0.706	0.011	0.404
977	ID39302704	39302704	117	1.510	128.370	144.081	0	2882.256	6	0.500	1	-10921639	124.021	124	112	151	12030	7.106	0.485	0.014	0.465
978	ID39173167	39173167	117	1.812	128.599	143.877	0	3362.632	7	0.500	1	-10921639	125.495	124	114	153	12173	7.543	1.847	0.013	0.440
979	ID39365917	39365917	117	2.024	128.648	144.437	0	3843.008	8	0.500	1	-10921639	125.165	123	110	144	12141	8.044	0.488	0.019	0.584
980	ID39187073	39187073	117	1.043	128.573	144.803	0	4323.384	9	0.500	1	-10921639	121.515	121	110	142	11787	6.208	1.684	0.014	0.543
981	ID39134699	39134699	118	2.205	115.402	33.846	0	0.000	0	0.500	1	-10921639	127.052	125	113	156	12324	8.315	1.396	0.020	0.612
982	ID39299095	39299095	118	1.904	116.670	33.769	0	480.376	1	0.500	1	-10921639	126.598	126	113	154	12280	7.694	0.704	0.018	0.588
983	ID39109555	39109555	118	1.898	116.966	33.530	0	960.752	2	0.500	1	-10921639	126.412	124	114	149	12262	7.756	1.900	0.015	0.468
984	ID39265312	39265312	118	0.876	116.566	32.934	0	1441.128	3	0.500	1	-10921639	123.567	123	114	147	11986	5.534	1.626	0.007	0.303
985	ID39356322	39356322	118	1.215	117.065	32.579	0	1921.504	4	0.500	1	-10921639	124.330	124	111	146	12060	6.270	1.598	0.008	0.320
986	ID39103027	39103027	118	1.368	116.942	31.830	0	2401.880	5	0.500	1	-10921639	124.165	124	112	146	12044	6.479	1.791	0.012	0.466
987	ID39191329	39191329	118	0.933	117.397	32.257	0	2882.256	6	0.500	1	-10921639	122.660	121	109	139	11898	5.947	1.610	0.011	0.441
988	ID39090056	39090056	118	1.144	116.706	32.850	0	3362.632	7	0.500	1	-10921639	124.278	124	113	154	12055	6.419	1.599	0.015	0.583
989	ID39288669	39288669	118	0.925	116.579	33.463	0	3843.008	8	0.500	1	-10921639	123.361	123	111	136	11966	5.025	1.597	0.010	0.484
990	ID39076109	39076109	118	1.179	116.072	33.581	0	4323.384	9	0.500	1	-10921639	124.175	122	113	144	12045	6.516	0.496	0.013	0.504
991	ID39296597	39296597	119	1.177	6.075	205.487	0	960.752	2	0.500	1	-10921639	121.237	120	112	135	11760	5.697	1.585	0.017	0.700
992	ID39400616	39400616	119	2.107	5.973	205.537	0	1441.128	3	0.500	1	-10921639	124.959	123	112	155	12121	8.586	1.900	0.021	0.607
993	ID39434403	39434403	119	1.438	5.770	205.128	0	1921.504	4	0.500	1	-10921639	123.742	123	111	146	12003	6.500	1.714	0.013	0.471
994	ID39257653	39257653	119	1.275	5.863	205.157	0	2401.880	5	0.500	1	-10921639	122.979	122	112	137	11929	6.098	1.622	0.014	0.559
995	ID39337248	39337248	119	1.544	5.143	205.949	0	2882.256	6	0.500	1	-10921639	123.144	122	110	147	11945	7.493	1.775	0.015	0.482
996	ID39228866	39228866	119	1.536	5.421	205.801	0	3362.632	7	0.500	1	-10921639	122.464	122	109	142	11879	7.341	0.482	0.014	0.457
997	ID39397313	39397313	119	1.598	5.205	206.147	0	3843.008	8	0.500	1	-10921639	123.082	122	108	144	11939	7.040	1.900	0.018	0.626
998	ID39256219	39256219	119	1.432	5.110	206.240	0	4323.384	9	0.500	1	-10921639	121.381	120	111	144	11774	6.620	0.482	0.014	0.505
999	ID39144843	39144843	120	1.626	16.894	51.903	0	0.000	0	0.500	1	-10921639	125.041	124	113	146	12129	6.474	1.900	0.017	0.646
1000	ID39313325	39313325	120	1.923	17.812	51.946	0	480.376	1	0.500	1	-10921639	124.918	123	112	154	12117	7.755	0.474	0.022	0.689
1001	ID39124235	39124235	120	1.515	17.243	52.481	0	960.752	2	0.500	1	-10921639	123.897	123	113	143	12018	6.491	1.590	0.016	0.595
1002	ID39294554	39294554	120	1.258	17.278	52.598	0	1441.128	3	0.500	1	-10921639	123.711	123	113	158	12000	7.124	1.421	0.014	0.486
1003	ID39371685	39371685	120	1.266	16.867	52.943	0	1921.504	4	0.500	1	-10921639	122.361	121	111	145	11869	6.037	0.488	0.011	0.444
1004	ID39119873	39119873	120	1.148	16.381	51.716	0	2401.880	5	0.500	1	-10921639	122.381	122	112	144	11871	6.231	1.789	0.012	0.468
1005	ID39204407	39204407	120	1.276	17.215	52.277	0	2882.256	6	0.500	1	-10921639	124.206	123	113	153	12048	6.227	1.900	0.013	0.515
1006	ID39100402	39100402	120	1.281	17.737	52.762	0	3362.632	7	0.500	1	-10921639	122.856	122	112	146	11917	6.191	1.601	0.012	0.479
1007	ID39303494	39303494	120	1.246	16.126	52.667	0	3843.008	8	0.500	1	-10921639	122.495	122	111	137	11882	5.779	0.709	0.015	0.623
1008	ID39084037	39084037	120	1.233	16.030	51.395	0	4323.384	9	0.500	1	-10921639	121.392	120	109	157	11775	7.442	0.489	0.014	0.461
1009	ID39271522	39271522	121	1.202	48.278	202.763	0	0.000	0	0.500	1	-10921639	123.093	121	112	144	11940	6.730	1.699	0.010	0.369
1010	ID39423260	39423260	121	1.103	49.049	202.543	0	480.376	1	0.500	1	-10921639	121.227	120	111	169	11759	7.078	1.900	0.012	0.390
1011	ID39290308	39290308	121	1.063	48.812	202.366	0	960.752	2	0.500	1	-10921639	120.588	120	111	138	11697	5.722	1.837	0.012	0.515
1012	ID39394394	39394394	121	1.661	50.027	201.018	0	1441.128	3	0.500	1	-10921639	121.134	119	109	159	11750	8.621	0.469	0.016	0.455
1013	ID39434902	39434902	121	0.998	49.806	200.329	0	1921.504	4	0.500	1	-10921639	118.866	119	108	135	11530	5.787	0.708	0.013	0.538
1014	ID39140163	39140163	122	1.467	76.240	46.684	0	0.000	0	0.500	1	-10921639	122.340	121	112	142	11867	6.557	0.708	0.015	0.537
1015	ID39313993	39313993	122	2.187	76.660	46.521	0	480.376	1	0.500	1	-10921639	122.866	121	110	183	11918	10.146	0.489	0.022	0.511
1016	ID39120059	39120059	122	1.622	76.864	47.676	0	960.752	2	0.500	1	-10921639	121.485	119	110	146	11784	7.711	0.494	0.015	0.452
1017	ID39293252	39293252	122	1.492	77.183	46.706	0	1441.128	3	0.500	1	-10921639	122.412	121	110	145	11874	6.820	1.806	0.010	0.359
1018	ID39370886	39370886	122	1.507	78.534	47.154	0	1921.504	4	0.500	1	-10921639	121.412	121	111	144	11777	6.074	0.489	0.019	0.744
1019	ID39135592	39135592	123	1.199	185.878	38.234	0	0.000	0	0.500	1	-10921639	122.155	121	110	152	11849	6.726	0.487	0.008	0.304
1020	ID39304921	39304921	123	1.921	186.760	38.817	0	480.376	1	0.500	1	-10921639	124.392	122	109	149	12066	8.036	1.791	0.018	0.547
1021	ID39114010	39114010	123	1.546	187.131	38.657	0	960.752	2	0.500	1	-10921639	121.948	121	108	138	11829	7.002	0.489	0.013	0.462
1022	ID39279485	39279485	123	1.584	187.245	38.119	0	1441.128	3	0.500	1	-10921639	122.361	121	111	155	11869	7.481	0.490	0.017	0.535
1023	ID39357279	39357279	123	1.757	185.979	38.421	0	1921.504	4	0.500	1	-10921639	122.464	120	110	148	11879	8.134	0.487	0.014	0.404
1024	ID39199028	39199028	123	1.028	185.749	38.015	0	2882.256	6	0.500	1	-10921639	120.938	120	110	139	11731	5.607	0.497	0.012	0.492
1025	ID39093138	39093138	123	1.000	185.502	38.321	0	3362.632	7	0.500	1	-10921639	121.887	121	112	140	11823	5.530	1.396	0.009	0.373
1026	ID39133783	39133783	124	1.459	215.515	39.861	0	0.000	0	0.500	1	-10921639	122.495	121	110	142	11882	7.101	1.900	0.014	0.477
1027	ID39305974	39305974	124	1.271	217.768	39.708	0	480.376	1	0.500	1	-10921639	120.124	119	110	142	11652	6.061	1.900	0.009	0.362
1028	ID39113914	39113914	124	1.120	218.132	38.590	0	960.752	2	0.500	1	-10921639	118.948	119	110	136	11538	5.434	0.491	0.012	0.503
1029	ID39279981	39279981	124	1.993	218.348	38.419	0	1441.128	3	0.500	1	-10921639	121.856	121	109	150	11820	8.379	0.481	0.022	0.614
1030	ID39357702	39357702	124	1.438	217.431	39.028	0	1921.504	4	0.500	1	-10921639	121.598	121	111	143	11795	6.977	1.399	0.015	0.526
1031	ID39280608	39280608	125	1.445	117.051	212.392	0	0.000	0	0.500	1	-10921639	122.381	121	110	141	11871	6.879	0.478	0.011	0.403
1032	ID39425017	39425017	125	1.072	118.329	212.357	0	480.376	1	0.500	1	-10921639	121.082	120	113	139	11745	4.991	1.676	0.006	0.281
1033	ID39298150	39298150	125	1.361	117.918	212.095	0	960.752	2	0.500	1	-10921639	122.237	122	113	153	11857	6.697	1.900	0.012	0.419
1034	ID39406178	39406178	125	0.961	118.895	212.146	0	1441.128	3	0.500	1	-10921639	120.753	120	111	141	11713	5.498	1.900	0.006	0.273
1035	ID39436020	39436020	125	0.947	119.088	211.792	0	1921.504	4	0.500	1	-10921639	121.268	121	111	139	11763	5.326	1.900	0.008	0.352
1036	ID39343463	39343463	125	1.225	118.835	212.795	0	2882.256	6	0.500	1	-10921639	121.557	121	111	142	11791	5.874	1.900	0.016	0.654
1037	ID39235607	39235607	125	1.118	118.808	212.645	0	3362.632	7	0.500	1	-10921639	122.351	122	108	133	11868	5.256	1.900	0.012	0.563
1038	ID39402445	39402445	125	1.545	119.211	212.852	0	3843.008	8	0.500	1	-10921639	123.165	121	110	146	11947	7.071	0.703	0.014	0.478
1039	ID39242086	39242086	126	1.458	60.837	169.012	0	0.000	0	0.500	1	-10921639	122.278	121	109	152	11861	7.340	0.495	0.015	0.495
1040	ID39411966	39411966	126	1.319	61.346	169.124	0	480.376	1	0.500	1	-10921639	120.144	119	110	141	11654	6.288	0.712	0.017	0.631
1041	ID39246729	39246729	126	1.117	62.082	169.259	0	960.752	2	0.500	1	-10921639	120.402	119	111	138	11679	5.859	1.715	0.011	0.465
1042	ID39375388	39375388	126	1.028	62.669	168.420	0	1441.128	3	0.500	1	-10921639	120.990	120	110	141	11736	6.311	1.900	0.014	0.530
1043	ID39427514	39427514	126	1.085	62.712	168.662	0	1921.504	4	0.500	1	-10921639	121.773	122	112	138	11812	5.857	0.487	0.015	0.595
1044	ID39314308	39314308	126	1.031	62.775	168.164	0	2882.256	6	0.500	1	-10921639	121.928	121	110	156	11827	6.616	1.589	0.011	0.383
1045	ID39192609	39192609	126	0.904	62.407	167.691	0	3362.632	7	0.500	1	-10921639	120.928	120	110	144	11730	5.619	1.900	0.010	0.445
1046	ID39209656	39209656	127	1.297	177.116	138.556	0	0.000	0	0.500	1	-10921639	121.515	121	110	137	11787	6.103	0.714	0.012	0.488
1047	ID39385507	39385507	127	1.254	178.177	137.271	0	480.376	1	0.500	1	-10921639	120.464	120	107	137	11685	5.714	0.486	0.014	0.581
1048	ID39204251	39204251	127	0.924	178.972	137.351	0	960.752	2	0.500	1	-10921639	120.763	120	110	136	11714	5.196	1.680	0.007	0.332
1049	ID39358736	39358736	127	0.938	178.138	137.399	0	1441.128	3	0.500	1	-10921639	120.113	120	109	137	11651	5.002	1.802	0.014	0.644
1050	ID39415947	39415947	127	0.977	178.348	138.316	0	1921.504	4	0.500	1	-10921639	119.351	119	109	138	11577	5.844	0.484	0.013	0.506
1051	ID39191981	39191981	128	1.034	154.613	122.784	0	960.752	2	0.500	1	-10921639	118.247	117	108	141	11470	5.364	0.492	0.013	0.552
1052	ID39349015	39349015	128	1.171	153.945	123.126	0	1441.128	3	0.500	1	-10921639	119.031	117	109	153	11546	7.319	1.900	0.018	0.575
1053	ID39411376	39411376	128	1.220	154.102	121.386	0	1921.504	4	0.500	1	-10921639	117.825	117	108	142	11429	6.769	0.472	0.014	0.470
1054	ID39221257	39221257	129	1.056	113.508	146.665	0	0.000	0	0.500	1	-10921639	121.268	121	109	143	11763	6.063	1.438	0.010	0.380
1055	ID39393296	39393296	129	1.494	113.876	145.275	0	480.376	1	0.500	1	-10921639	121.608	120	108	148	11796	7.177	1.900	0.013	0.448
1056	ID39213791	39213791	129	1.085	110.762	145.013	0	960.752	2	0.500	1	-10921639	120.041	120	110	144	11644	5.858	1.900	0.015	0.605
1057	ID39365389	39365389	129	1.497	110.533	144.510	0	1441.128	3	0.500	1	-10921639	122.247	121	110	141	11858	6.640	0.480	0.010	0.365
1058	ID39420078	39420078	129	1.433	110.834	144.781	0	1921.504	4	0.500	1	-10921639	120.959	120	111	142	11733	6.762	0.479	0.016	0.564
1059	ID39179818	39179818	130	1.614	214.230	112.224	0	960.752	2	0.500	1	-10921639	119.948	118	107	141	11635	7.382	0.488	0.015	0.472
1060	ID39343656	39343656	130	1.280	215.257	112.958	0	1441.128	3	0.500	1	-10921639	118.742	118	107	140	11518	6.368	0.706	0.011	0.403
1061	ID39412353	39412353	130	1.671	214.748	113.541	0	1921.504	4	0.500	1	-10921639	118.928	116	108	149	11536	8.164	0.486	0.014	0.415
1062	ID39132346	39132346	131	1.134	71.422	62.333	0	960.752	2	0.500	1	-10921639	119.598	118	109	148	11601	6.213	0.705	0.015	0.562
1063	ID39307729	39307729	131	1.197	69.626	62.330	0	1441.128	3	0.500	1	-10921639	120.732	120	110	143	11711	6.251	1.900	0.013	0.483
1064	ID39379863	39379863	131	1.252	70.007	63.120	0	1921.504	4	0.500	1	-10921639	120.062	119	111	135	11646	5.866	0.489	0.014	0.558
1065	ID39226423	39226423	131	0.927	69.919	63.600	0	2882.256	6	0.500	1	-10921639	120.206	119	107	140	11660	5.748	1.594	0.009	0.353
1066	ID39102732	39102732	131	1.101	70.699	63.568	0	3362.632	7	0.500	1	-10921639	119.784	119	108	138	11619	5.821	1.787	0.010	0.405
1067	ID39161021	39161021	132	1.105	137.268	77.519	0	0.000	0	0.500	1	-10921639	120.485	120	111	136	11687	5.447	0.713	0.011	0.489
1068	ID39340557	39340557	132	1.686	137.961	77.722	0	480.376	1	0.500	1	-10921639	120.948	119	108	143	11732	7.614	0.486	0.018	0.551
1069	ID39144662	39144662	132	1.323	138.291	78.042	0	960.752	2	0.500	1	-10921639	121.381	121	111	139	11774	6.102	1.900	0.012	0.460
1070	ID39321049	39321049	132	0.885	138.361	77.827	0	1441.128	3	0.500	1	-10921639	120.175	119	111	146	11657	5.856	1.900	0.005	0.219
1071	ID39386642	39386642	132	0.879	138.960	77.998	0	1921.504	4	0.500	1	-10921639	119.928	120	109	132	11633	5.067	1.411	0.005	0.254
1072	ID39176773	39176773	133	0.985	88.458	99.385	0	0.000	0	0.500	1	-10921639	120.093	119	111	144	11649	6.042	1.900	0.010	0.388
1073	ID39358425	39358425	133	0.953	89.063	99.335	0	480.376	1	0.500	1	-10921639	119.433	118	109	134	11585	5.121	1.599	0.007	0.343
1074	ID39165686	39165686	133	1.189	89.593	99.092	0	960.752	2	0.500	1	-10921639	119.247	118	110	137	11567	6.093	1.410	0.015	0.562
1075	ID39330303	39330303	133	1.130	89.500	99.007	0	1441.128	3	0.500	1	-10921639	119.546	119	108	141	11596	5.620	0.477	0.012	0.510
1076	ID39401872	39401872	133	0.996	89.133	98.843	0	1921.504	4	0.500	1	-10921639	119.784	120	109	140	11619	5.756	1.807	0.009	0.391
1077	ID39143483	39143483	134	1.593	204.372	55.794	0	0.000	0	0.500	1	-10921639	122.907	121	110	153	11922	7.415	0.484	0.016	0.537
1078	ID39315221	39315221	134	1.113	205.489	54.576	0	480.376	1	0.500	1	-10921639	122.794	122	111	138	11911	5.824	1.810	0.012	0.480
1079	ID39126063	39126063	134	0.962	205.052	54.548	0	960.752	2	0.500	1	-10921639	122.598	122	113	138	11892	5.203	1.900	0.007	0.314
1080	ID39297004	39297004	134	1.390	205.073	54.889	0	1441.128	3	0.500	1	-10921639	123.196	122	109	141	11950	5.901	0.716	0.018	0.735
1081	ID39368678	39368678	134	1.186	205.189	54.859	0	1921.504	4	0.500	1	-10921639	122.959	122	113	146	11927	6.205	1.394	0.015	0.580
1082	ID39298202	39298202	135	0.888	170.824	56.344	0	1441.128	3	0.500	1	-10921639	119.608	119	109	136	11602	5.363	1.832	0.011	0.493
1083	ID39374454	39374454	135	0.883	171.414	56.835	0	1921.504	4	0.500	1	-10921639	119.454	119	108	138	11587	5.150	1.900	0.013	0.580
1084	ID39215984	39215984	136	0.938	107.597	140.460	0	0.000	0	0.500	1	-10921639	120.289	119	111	148	11668	5.838	1.215	0.004	0.172
1085	ID39388754	39388754	136	1.160	107.808	141.170	0	480.376	1	0.500	1	-10921639	121.351	121	110	139	11771	6.079	0.485	0.009	0.369
1086	ID39210139	39210139	136	1.546	107.978	139.807	0	960.752	2	0.500	1	-10921639	121.299	119	109	144	11766	7.028	0.478	0.016	0.551
1087	ID39360903	39360903	136	1.271	108.547	141.270	0	1441.128	3	0.500	1	-10921639	121.588	121	110	143	11794	6.820	1.400	0.015	0.542
1088	ID39418775	39418775	136	0.966	108.792	140.391	0	1921.504	4	0.500	1	-10921639	120.186	119	110	143	11658	5.267	1.767	0.007	0.313
1089	ID39137297	39137297	137	1.048	69.196	66.493	0	960.752	2	0.500	1	-10921639	121.144	121	110	135	11751	5.422	0.712	0.006	0.270
1090	ID39305889	39305889	137	1.057	69.208	66.166	0	1441.128	3	0.500	1	-10921639	120.577	120	111	143	11696	5.660	0.488	0.010	0.417
1091	ID39383949	39383949	137	1.051	69.637	66.635	0	1921.504	4	0.500	1	-10921639	121.010	120	108	136	11738	5.359	0.486	0.010	0.462
1092	ID39250650	39250650	138	0.984	107.397	182.352	0	0.000	0	0.500	1	-10921639	121.876	121	110	137	11822	5.581	1.900	0.011	0.483
1093	ID39415122	39415122	138	1.247	108.740	180.750	0	480.376	1	0.500	1	-10921639	120.495	119	111	141	11688	6.054	0.491	0.016	0.642
1094	ID39257458	39257458	138	0.916	108.615	180.962	0	960.752	2	0.500	1	-10921639	120.309	120	108	137	11670	5.630	0.496	0.006	0.264
1095	ID39387296	39387296	138	0.907	109.251	180.577	0	1441.128	3	0.500	1	-10921639	120.763	120	111	135	11714	5.346	1.793	0.007	0.316
1096	ID39430954	39430954	138	1.339	109.361	180.774	0	1921.504	4	0.500	1	-10921639	121.598	119	111	158	11795	7.222	0.496	0.014	0.478
1097	ID39157831	39157831	139	1.084	141.723	73.190	0	0.000	0	0.500	1	-10921639	121.495	121	111	137	11785	5.300	1.387	0.009	0.417
1098	ID39334259	39334259	139	1.660	141.995	73.098	0	480.376	1	0.500	1	-10921639	123.454	122	112	159	11975	7.474	0.714	0.015	0.481
1099	ID39141456	39141456	139	1.019	141.873	72.907	0	960.752	2	0.500	1	-10921639	121.464	121	110	136	11782	5.387	1.604	0.011	0.491
1100	ID39310961	39310961	139	1.229	141.999	72.773	0	1441.128	3	0.500	1	-10921639	123.062	122	109	144	11937	6.650	1.803	0.011	0.391
1101	ID39156847	39156847	140	1.826	79.343	71.810	0	0.000	0	0.500	1	-10921639	124.278	123	116	146	12055	6.367	0.487	0.015	0.593
1102	ID39329019	39329019	140	1.461	80.080	71.633	0	480.376	1	0.500	1	-10921639	122.361	121	112	146	11869	7.085	0.492	0.016	0.550
1103	ID39140179	39140179	140	0.991	79.884	71.418	0	960.752	2	0.500	1	-10921639	119.052	118	108	137	11548	5.745	1.606	0.009	0.370
1104	ID39314739	39314739	140	0.896	80.499	71.117	0	1441.128	3	0.500	1	-10921639	119.845	118	109	144	11625	6.692	1.900	0.008	0.292
1105	ID39124395	39124395	141	1.369	104.759	21.041	0	0.000	0	0.500	1	-10921639	122.753	122	113	145	11907	6.584	0.484	0.017	0.608
1106	ID39290489	39290489	141	1.305	105.750	20.412	0	480.376	1	0.500	1	-10921639	122.680	122	111	141	11900	6.347	1.900	0.016	0.614
1107	ID39096413	39096413	141	1.378	105.568	20.869	0	960.752	2	0.500	1	-10921639	123.041	122	112	142	11935	6.096	1.399	0.014	0.546
1108	ID39246635	39246635	141	0.984	105.751	21.036	0	1441.128	3	0.500	1	-10921639	122.320	122	112	142	11865	5.336	1.791	0.008	0.361
1109	ID39115354	39115354	142	1.367	114.578	41.589	0	960.752	2	0.500	1	-10921639	120.979	120	111	141	11735	5.965	1.780	0.011	0.446
1110	ID39287520	39287520	142	0.918	112.963	42.298	0	1441.128	3	0.500	1	-10921639	120.794	121	110	137	11717	5.612	1.779	0.009	0.402
1111	ID39122014	39122014	143	1.352	22.875	23.302	0	0.000	0	0.500	1	-10921639	122.649	122	110	139	11897	5.918	0.703	0.010	0.399
1112	ID39287257	39287257	143	1.445	23.569	23.135	0	480.376	1	0.500	1	-10921639	122.629	122	112	144	11895	6.995	0.492	0.017	0.595
1113	ID39101507	39101507	143	1.307	23.466	23.424	0	960.752	2	0.500	1	-10921639	121.402	120	110	158	11776	7.087	1.387	0.014	0.465
1114	ID39253524	39253524	143	1.270	23.047	23.012	0	1441.128	3	0.500	1	-10921639	121.928	120	109	146	11827	6.693	1.900	0.013	0.453
1115	ID39099027	39099027	143	0.921	23.096	23.397	0	2401.880	5	0.500	1	-10921639	121.567	121	111	147	11792	5.777	1.680	0.015	0.642
1116	ID39179651	39179651	143	1.207	22.841	23.067	0	2882.256	6	0.500	1	-10921639	121.938	121	111	139	11828	5.807	1.397	0.010	0.426
1117	ID39085259	39085259	143	0.968	23.039	23.354	0	3362.632	7	0.500	1	-10921639	121.804	122	110	142	11815	5.829	0.495	0.010	0.432
1118	ID39279074	39279074	143	1.036	23.062	23.566	0	3843.008	8	0.500	1	-10921639	121.062	121	110	146	11743	6.101	1.900	0.014	0.566
1119	ID39075181	39075181	143	1.150	22.903	23.704	0	4323.384	9	0.500	1	-10921639	121.134	120	107	144	11750	6.563	1.900	0.011	0.401
1120	ID39185810	39185810	144	1.347	135.226	106.971	0	0.000	0	0.500	1	-10921639	123.351	122	113	150	11965	7.408	0.490	0.013	0.423
1121	ID39365234	39365234	144	1.099	135.490	107.534	0	480.376	1	0.500	1	-10921639	122.907	122	111	148	11922	6.819	1.677	0.010	0.358
1122	ID39175012	39175012	144	1.078	135.353	107.534	0	960.752	2	0.500	1	-10921639	122.278	122	112	144	11861	6.737	1.604	0.011	0.407
1123	ID39334757	39334757	144	0.955	136.070	107.674	0	1441.128	3	0.500	1	-10921639	122.124	122	113	141	11846	5.500	0.490	0.010	0.451
1124	ID39173157	39173157	144	1.209	135.532	107.394	0	2401.880	5	0.500	1	-10921639	122.753	122	111	168	11907	7.801	0.487	0.016	0.509
1125	ID39275968	39275968	144	0.927	135.553	107.515	0	2882.256	6	0.500	1	-10921639	121.505	121	108	143	11786	6.371	1.797	0.013	0.489
1126	ID39278658	39278658	145	1.576	200.891	220.202	0	0.000	0	0.500	1	-10921639	123.082	121	108	150	11939	7.497	0.708	0.018	0.592
1127	ID39429391	39429391	145	1.674	202.448	220.010	0	480.376	1	0.500	1	-10921639	123.041	121	108	157	11935	8.386	0.476	0.017	0.490
1128	ID39303520	39303520	145	1.352	203.122	220.573	0	960.752	2	0.500	1	-10921639	122.887	121	112	149	11920	7.326	1.803	0.015	0.506
1129	ID39407036	39407036	145	1.704	202.287	219.983	0	1441.128	3	0.500	1	-10921639	124.103	123	110	147	12038	7.856	0.493	0.019	0.581
1130	ID39137464	39137464	146	1.335	40.569	44.333	0	0.000	0	0.500	1	-10921639	122.753	122	113	143	11907	6.405	1.900	0.013	0.502
1131	ID39309468	39309468	146	1.030	41.270	43.313	0	480.376	1	0.500	1	-10921639	121.423	121	111	141	11778	4.924	0.475	0.012	0.579
1132	ID39118876	39118876	146	1.327	40.483	44.301	0	960.752	2	0.500	1	-10921639	121.763	120	110	152	11811	7.204	1.900	0.014	0.483
1133	ID39288010	39288010	146	0.919	40.623	44.341	0	1441.128	3	0.500	1	-10921639	120.711	120	112	139	11709	5.200	0.711	0.010	0.466
1134	ID39114835	39114835	146	0.916	40.876	45.097	0	2401.880	5	0.500	1	-10921639	120.876	120	111	139	11725	5.106	0.494	0.008	0.388
1135	ID39200174	39200174	146	1.007	40.707	44.951	0	2882.256	6	0.500	1	-10921639	121.835	122	110	140	11818	5.107	1.900	0.010	0.464
1136	ID39299277	39299277	146	1.134	40.616	45.475	0	3843.008	8	0.500	1	-10921639	121.062	121	110	137	11743	5.888	1.817	0.011	0.429
1137	ID39078060	39078060	146	1.166	40.199	45.287	0	4323.384	9	0.500	1	-10921639	122.639	121	113	142	11896	5.687	1.803	0.010	0.445
1138	ID39280707	39280707	147	1.822	173.043	212.589	0	0.000	0	0.500	1	-10921639	127.041	127	114	146	12323	7.642	0.713	0.022	0.730
1139	ID39425194	39425194	147	1.226	174.021	212.784	0	480.376	1	0.500	1	-10921639	124.701	123	109	159	12096	7.273	1.900	0.012	0.391
1140	ID39298335	39298335	147	0.928	173.488	212.351	0	960.752	2	0.500	1	-10921639	123.165	122	111	172	11947	7.929	1.900	0.008	0.260
1141	ID39406199	39406199	147	0.890	174.474	212.094	0	1441.128	3	0.500	1	-10921639	124.670	124	114	172	12093	7.241	0.495	0.007	0.226
1142	ID39261955	39261955	147	1.004	175.404	211.079	0	2401.880	5	0.500	1	-10921639	125.134	124	116	144	12138	5.994	1.900	0.004	0.183
1143	ID39344817	39344817	147	0.883	175.919	211.459	0	2882.256	6	0.500	1	-10921639	123.845	124	108	138	12013	5.312	0.702	0.005	0.253
1144	ID39227983	39227983	147	0.910	175.828	211.166	0	3362.632	7	0.500	1	-10921639	123.000	123	110	139	11931	6.059	1.593	0.012	0.466
1145	ID39167383	39167383	148	1.362	117.948	80.452	0	0.000	0	0.500	1	-10921639	121.979	120	109	141	11832	6.403	1.816	0.015	0.555
1146	ID39337647	39337647	148	1.266	118.781	80.220	0	480.376	1	0.500	1	-10921639	121.907	121	110	146	11825	6.537	1.682	0.011	0.423
1147	ID39147292	39147292	148	1.665	118.482	79.447	0	960.752	2	0.500	1	-10921639	123.371	122	112	145	11967	7.265	1.840	0.013	0.444
1148	ID39316430	39316430	148	1.619	118.890	79.701	0	1441.128	3	0.500	1	-10921639	122.557	121	111	149	11888	7.406	1.793	0.016	0.528
1149	ID39148138	39148138	148	1.502	118.777	80.274	0	2401.880	5	0.500	1	-10921639	123.299	123	109	161	11960	7.408	0.899	0.014	0.465
1150	ID39240948	39240948	148	1.186	118.943	80.101	0	2882.256	6	0.500	1	-10921639	122.608	122	107	141	11893	6.041	1.900	0.013	0.520
1151	ID39118079	39118079	148	0.888	119.103	80.128	0	3362.632	7	0.500	1	-10921639	120.402	121	106	135	11679	5.386	0.710	0.014	0.598
1152	ID39321585	39321585	148	1.148	118.898	79.969	0	3843.008	8	0.500	1	-10921639	121.371	120	110	143	11773	6.775	0.706	0.013	0.445
1153	ID39104563	39104563	148	0.993	118.072	79.980	0	4323.384	9	0.500	1	-10921639	119.629	118	107	146	11604	6.969	0.487	0.008	0.259
1154	ID39292697	39292697	149	1.457	148.494	206.948	0	960.752	2	0.500	1	-10921639	124.062	124	111	141	12034	6.445	0.491	0.011	0.409
1155	ID39399023	39399023	149	1.061	148.566	207.507	0	1441.128	3	0.500	1	-10921639	122.103	121	113	140	11844	5.283	1.596	0.009	0.418
1156	ID39258464	39258464	149	1.230	148.263	207.532	0	2401.880	5	0.500	1	-10921639	122.392	122	109	140	11872	5.685	1.900	0.017	0.716
1157	ID39342158	39342158	149	1.459	148.470	207.794	0	2882.256	6	0.500	1	-10921639	122.371	122	110	150	11870	7.057	1.800	0.017	0.574
1158	ID39230956	39230956	149	1.160	148.962	208.012	0	3362.632	7	0.500	1	-10921639	121.423	120	109	137	11778	6.514	0.495	0.013	0.465
1159	ID39401499	39401499	149	1.121	149.017	208.114	0	3843.008	8	0.500	1	-10921639	120.794	120	110	142	11717	6.361	1.398	0.012	0.450
1160	ID39263631	39263631	149	1.025	148.309	206.871	0	4323.384	9	0.500	1	-10921639	121.309	120	109	147	11767	5.807	0.489	0.008	0.318
1161	ID39127806	39127806	150	1.346	135.097	31.249	0	0.000	0	0.500	1	-10921639	122.247	121	111	140	11858	6.551	1.900	0.013	0.479
1162	ID39301155	39301155	150	1.419	135.243	31.159	0	480.376	1	0.500	1	-10921639	123.340	123	111	149	11964	6.827	0.479	0.013	0.458
1163	ID39107584	39107584	150	1.810	135.303	30.724	0	960.752	2	0.500	1	-10921639	123.495	123	112	157	11979	7.743	1.900	0.020	0.631
1164	ID39270627	39270627	150	1.136	134.132	31.146	0	1441.128	3	0.500	1	-10921639	122.660	123	110	137	11898	5.764	0.489	0.009	0.393
1165	ID39271299	39271299	151	1.270	176.231	202.463	0	0.000	0	0.500	1	-10921639	122.701	122	109	143	11902	6.012	1.900	0.016	0.645
1166	ID39423247	39423247	151	1.770	176.897	202.461	0	480.376	1	0.500	1	-10921639	123.577	121	110	149	11987	8.446	0.480	0.015	0.436
1167	ID39290368	39290368	151	1.249	176.990	202.344	0	960.752	2	0.500	1	-10921639	123.907	123	114	142	12019	6.139	1.583	0.015	0.596
1168	ID39394999	39394999	151	1.538	177.108	202.059	0	1441.128	3	0.500	1	-10921639	124.649	123	111	151	12091	6.765	0.706	0.016	0.576
1169	ID39244857	39244857	152	1.015	95.755	167.454	0	960.752	2	0.500	1	-10921639	121.052	121	112	141	11742	5.397	1.599	0.008	0.367
1170	ID39374666	39374666	152	1.215	95.858	167.286	0	1441.128	3	0.500	1	-10921639	121.412	121	110	136	11777	5.246	0.475	0.006	0.256
1171	ID39132696	39132696	153	1.626	37.486	41.926	0	0.000	0	0.500	1	-10921639	123.608	121	111	144	11990	7.349	1.598	0.017	0.549
1172	ID39303192	39303192	153	1.558	37.885	41.608	0	480.376	1	0.500	1	-10921639	122.814	121	109	147	11913	7.675	0.709	0.015	0.488
1173	ID39115305	39115305	153	1.697	37.249	41.621	0	960.752	2	0.500	1	-10921639	123.144	122	108	146	11945	7.855	0.703	0.018	0.568
1174	ID39286526	39286526	153	1.461	37.481	41.226	0	1441.128	3	0.500	1	-10921639	122.144	120	110	153	11848	7.455	0.743	0.021	0.666
1175	ID39119080	39119080	154	1.707	86.962	13.195	0	0.000	0	0.500	1	-10921639	124.505	124	111	150	12077	7.364	1.900	0.015	0.500
1176	ID39279790	39279790	154	2.121	87.523	12.378	0	480.376	1	0.500	1	-10921639	124.649	122	110	154	12091	8.748	0.485	0.021	0.597
1177	ID39093207	39093207	154	1.951	88.198	13.387	0	960.752	2	0.500	1	-10921639	123.742	122	113	160	12003	8.109	1.900	0.014	0.426
1178	ID39235921	39235921	154	1.231	88.226	13.332	0	1441.128	3	0.500	1	-10921639	122.330	121	112	144	11866	6.480	1.900	0.008	0.315
1179	ID39091611	39091611	154	1.343	87.434	13.621	0	2401.880	5	0.500	1	-10921639	123.165	123	111	150	11947	6.598	1.900	0.018	0.675
1180	ID39169237	39169237	154	1.425	87.365	13.563	0	2882.256	6	0.500	1	-10921639	124.041	123	112	146	12032	6.495	0.487	0.015	0.556
1181	ID39081811	39081811	154	1.456	87.487	14.070	0	3362.632	7	0.500	1	-10921639	123.196	122	113	141	11950	6.159	0.483	0.015	0.577
1182	ID39256089	39256089	154	1.455	87.767	13.729	0	3843.008	8	0.500	1	-10921639	124.082	124	112	142	12036	5.787	1.708	0.016	0.681
1183	ID39074382	39074382	154	1.648	87.569	14.105	0	4323.384	9	0.500	1	-10921639	125.124	124	112	149	12137	7.575	0.714	0.009	0.285
1184	ID39125804	39125804	155	1.215	134.762	26.395	0	0.000	0	0.500	1	-10921639	125.258	124	115	144	12150	6.369	1.800	0.018	0.691
1185	ID39294095	39294095	155	1.382	135.547	25.950	0	480.376	1	0.500	1	-10921639	124.361	122	112	155	12063	7.965	0.700	0.022	0.673
1186	ID39102160	39102160	155	1.368	135.899	25.708	0	960.752	2	0.500	1	-10921639	123.268	123	113	148	11957	6.485	0.721	0.014	0.543
1187	ID39256878	39256878	155	1.069	137.444	25.393	0	1441.128	3	0.500	1	-10921639	120.959	121	109	138	11733	6.107	0.726	0.015	0.601
1188	ID39257920	39257920	156	1.055	72.481	189.551	0	0.000	0	0.500	1	-10921639	122.784	122	113	143	11910	5.856	1.391	0.012	0.506
1189	ID39418373	39418373	156	1.495	74.262	190.521	0	480.376	1	0.500	1	-10921639	122.887	122	109	165	11920	8.298	0.498	0.020	0.567
1190	ID39273691	39273691	156	1.916	73.474	189.959	0	960.752	2	0.500	1	-10921639	124.876	124	112	152	12113	8.015	1.786	0.016	0.484
1191	ID39392520	39392520	156	1.993	75.605	189.835	0	1441.128	3	0.500	1	-10921639	124.536	123	113	154	12080	8.594	0.481	0.022	0.619
1192	ID39263488	39263488	157	1.392	134.083	204.449	0	0.000	0	0.500	1	-10921639	125.000	125	114	148	12125	6.724	0.488	0.012	0.436
1193	ID39422824	39422824	157	1.611	134.765	204.471	0	480.376	1	0.500	1	-10921639	124.639	123	113	143	12090	6.806	0.492	0.013	0.456
1194	ID39295961	39295961	157	1.631	134.560	204.657	0	960.752	2	0.500	1	-10921639	124.505	124	113	148	12077	7.036	0.485	0.017	0.595
1195	ID39397727	39397727	157	0.998	135.283	203.651	0	1441.128	3	0.500	1	-10921639	121.918	121	110	148	11826	5.984	1.900	0.015	0.607
1196	ID39256207	39256207	157	1.391	135.579	203.686	0	2401.880	5	0.500	1	-10921639	121.660	122	109	141	11801	6.276	0.487	0.018	0.680
1197	ID39336075	39336075	157	1.181	134.920	202.528	0	2882.256	6	0.500	1	-10921639	120.711	120	109	140	11709	6.356	1.900	0.018	0.657
1198	ID39226685	39226685	157	1.647	132.919	203.539	0	3362.632	7	0.500	1	-10921639	122.990	122	111	148	11930	7.335	1.900	0.016	0.529
1199	ID39396210	39396210	157	1.360	132.988	202.680	0	3843.008	8	0.500	1	-10921639	122.567	121	110	146	11889	6.700	0.709	0.016	0.559
1200	ID39259153	39259153	157	1.466	132.710	203.709	0	4323.384	9	0.500	1	-10921639	122.124	121	111	148	11846	7.255	0.472	0.016	0.524
1201	ID39242693	39242693	158	1.108	16.518	164.497	0	960.752	2	0.500	1	-10921639	119.897	119	100	140	11630	6.217	0.494	0.009	0.357
1202	ID39377703	39377703	158	1.069	16.540	164.307	0	1441.128	3	0.500	1	-10921639	120.278	120	108	138	11667	5.965	1.808	0.011	0.442
1203	ID39207825	39207825	159	1.078	119.811	132.989	0	0.000	0	0.500	1	-10921639	120.402	119	110	140	11679	6.259	0.486	0.008	0.315
1204	ID39383572	39383572	159	0.929	120.650	132.596	0	480.376	1	0.500	1	-10921639	120.031	120	110	140	11643	6.080	1.703	0.007	0.269
1205	ID39202498	39202498	159	0.942	119.614	132.633	0	960.752	2	0.500	1	-10921639	119.979	119	109	138	11638	6.313	1.900	0.004	0.155
1206	ID39353081	39353081	159	1.021	119.929	132.288	0	1441.128	3	0.500	1	-10921639	120.918	120	110	154	11729	6.034	1.750	0.007	0.294
1207	ID39185234	39185234	159	1.296	120.051	132.625	0	2401.880	5	0.500	1	-10921639	120.072	119	109	141	11647	6.883	1.900	0.011	0.394
1208	ID39291613	39291613	159	1.567	120.700	132.867	0	2882.256	6	0.500	1	-10921639	121.258	120	111	149	11762	6.956	1.804	0.017	0.597
1209	ID39159489	39159489	159	1.191	120.662	132.325	0	3362.632	7	0.500	1	-10921639	119.722	118	110	141	11613	6.184	1.900	0.018	0.671
1210	ID39360469	39360469	159	1.200	121.030	133.146	0	3843.008	8	0.500	1	-10921639	120.216	118	110	137	11661	5.808	0.492	0.011	0.462
1211	ID39166988	39166988	159	1.081	120.375	133.626	0	4323.384	9	0.500	1	-10921639	119.938	119	109	136	11634	5.813	1.900	0.008	0.340
1212	ID39121371	39121371	160	1.551	92.782	22.699	0	0.000	0	0.500	1	-10921639	125.031	124	112	146	12128	6.945	1.900	0.012	0.436
1213	ID39289009	39289009	160	1.417	93.361	23.405	0	480.376	1	0.500	1	-10921639	124.082	123	110	137	12036	6.115	1.727	0.014	0.574
1214	ID39101412	39101412	160	1.142	94.046	22.755	0	960.752	2	0.500	1	-10921639	123.381	123	114	142	11968	5.658	1.599	0.012	0.528
1215	ID39253209	39253209	160	0.916	93.838	22.712	0	1441.128	3	0.500	1	-10921639	123.031	122	114	141	11934	5.151	1.388	0.007	0.339
1216	ID39304421	39304421	161	1.210	95.247	218.542	0	960.752	2	0.500	1	-10921639	122.454	121	111	153	11878	7.130	1.900	0.007	0.229
1217	ID39405310	39405310	161	1.167	94.333	218.494	0	1441.128	3	0.500	1	-10921639	121.454	120	109	142	11781	6.733	1.772	0.014	0.502
1218	ID39280406	39280406	161	1.594	92.558	219.429	0	2401.880	5	0.500	1	-10921639	121.753	121	109	156	11810	7.658	0.487	0.020	0.635
1219	ID39346527	39346527	161	1.579	92.225	220.328	0	2882.256	6	0.500	1	-10921639	121.041	119	111	147	11741	7.661	0.479	0.018	0.551
1220	ID39242905	39242905	161	1.439	93.182	220.077	0	3362.632	7	0.500	1	-10921639	122.412	122	111	142	11874	6.689	1.900	0.012	0.441
1221	ID39406162	39406162	161	1.156	93.110	219.307	0	3843.008	8	0.500	1	-10921639	120.907	120	110	139	11728	6.691	0.477	0.014	0.488
1222	ID39272078	39272078	161	0.996	92.864	219.899	0	4323.384	9	0.500	1	-10921639	120.794	120	112	137	11717	5.346	1.900	0.009	0.382
1223	ID39270791	39270791	162	1.490	129.643	206.557	0	0.000	0	0.500	1	-10921639	121.268	121	108	153	11763	7.501	0.485	0.017	0.555
1224	ID39424638	39424638	162	1.347	131.105	206.573	0	480.376	1	0.500	1	-10921639	122.113	121	111	144	11845	6.268	0.708	0.016	0.628
1225	ID39294433	39294433	162	1.257	130.684	207.457	0	960.752	2	0.500	1	-10921639	122.144	121	110	148	11848	6.904	0.480	0.008	0.280
1226	ID39401021	39401021	162	1.073	131.051	206.122	0	1441.128	3	0.500	1	-10921639	121.763	122	111	136	11811	5.418	1.703	0.009	0.398
1227	ID39113705	39113705	163	1.809	213.276	37.777	0	960.752	2	0.500	1	-10921639	122.660	121	110	146	11898	7.296	1.900	0.020	0.663
1228	ID39279155	39279155	163	0.944	212.563	37.811	0	1441.128	3	0.500	1	-10921639	118.247	117	106	135	11470	6.120	1.790	0.015	0.577
1229	ID39242731	39242731	164	0.919	63.019	164.424	0	960.752	2	0.500	1	-10921639	118.124	117	109	149	11458	6.430	1.396	0.010	0.358
1230	ID39377190	39377190	164	1.321	63.884	163.459	0	1441.128	3	0.500	1	-10921639	120.309	119	110	141	11670	6.610	0.483	0.006	0.225
1231	ID39278313	39278313	165	0.899	187.064	193.168	0	960.752	2	0.500	1	-10921639	121.433	121	110	137	11779	5.352	1.900	0.007	0.301
1232	ID39391537	39391537	165	0.907	187.284	192.836	0	1441.128	3	0.500	1	-10921639	121.381	121	111	145	11774	6.242	0.496	0.008	0.324
1233	ID39150442	39150442	166	1.728	50.109	67.460	0	0.000	0	0.500	1	-10921639	122.722	121	107	146	11904	7.461	1.900	0.016	0.528
1234	ID39331169	39331169	166	2.131	51.885	68.844	0	480.376	1	0.500	1	-10921639	121.196	118	109	157	11756	9.121	0.486	0.024	0.613
1235	ID39136234	39136234	166	2.016	51.722	68.751	0	960.752	2	0.500	1	-10921639	122.155	120	110	165	11849	8.898	1.690	0.021	0.559
1236	ID39309861	39309861	166	1.793	51.763	68.274	0	1441.128	3	0.500	1	-10921639	121.526	121	111	144	11788	7.370	1.900	0.019	0.609
1237	ID39157318	39157318	167	1.429	169.613	72.425	0	0.000	0	0.500	1	-10921639	122.608	122	110	141	11893	6.307	0.709	0.020	0.748
1238	ID39330090	39330090	167	1.645	169.500	72.528	0	480.376	1	0.500	1	-10921639	122.454	121	109	159	11878	7.106	0.485	0.015	0.511
1239	ID39140765	39140765	167	1.124	170.395	72.060	0	960.752	2	0.500	1	-10921639	120.454	120	110	145	11684	6.043	1.900	0.014	0.554
1240	ID39310872	39310872	167	0.934	170.459	72.477	0	1441.128	3	0.500	1	-10921639	120.464	120	109	134	11685	5.668	1.428	0.016	0.655
1241	ID39137354	39137354	167	0.945	170.728	72.806	0	2401.880	5	0.500	1	-10921639	119.959	119	109	133	11636	5.383	1.408	0.011	0.463
1242	ID39232956	39232956	167	1.084	170.473	72.961	0	2882.256	6	0.500	1	-10921639	121.619	121	110	139	11797	6.101	0.481	0.011	0.418
1243	ID39112071	39112071	167	1.055	170.242	72.038	0	3362.632	7	0.500	1	-10921639	121.845	121	111	141	11819	5.495	1.593	0.011	0.466
1244	ID39316761	39316761	167	1.666	170.928	72.493	0	3843.008	8	0.500	1	-10921639	122.546	121	110	151	11887	7.319	0.461	0.021	0.694
1245	ID39099387	39099387	167	1.141	170.985	72.249	0	4323.384	9	0.500	1	-10921639	121.464	121	109	143	11782	5.854	0.719	0.009	0.354
1246	ID39114733	39114733	168	1.131	116.462	6.090	0	0.000	0	0.500	1	-10921639	123.124	124	112	137	11943	5.372	1.580	0.008	0.382
1247	ID39270245	39270245	168	1.192	116.753	6.748	0	480.376	1	0.500	1	-10921639	122.247	121	113	150	11858	6.508	1.900	0.013	0.477
1248	ID39092400	39092400	168	1.192	116.341	6.809	0	960.752	2	0.500	1	-10921639	122.041	122	111	142	11838	6.553	0.712	0.011	0.399
1249	ID39240492	39240492	168	1.038	116.304	6.654	0	1441.128	3	0.500	1	-10921639	121.876	121	111	156	11822	6.635	0.314	0.010	0.380
1250	ID39095163	39095163	168	1.264	116.277	6.764	0	2401.880	5	0.500	1	-10921639	122.918	121	109	151	11923	7.312	0.477	0.008	0.282
1251	ID39175058	39175058	168	1.264	115.994	6.720	0	2882.256	6	0.500	1	-10921639	122.763	122	111	139	11908	6.286	1.604	0.013	0.519
1252	ID39079747	39079747	168	1.269	117.011	5.027	0	3362.632	7	0.500	1	-10921639	122.866	121	113	146	11918	6.197	1.794	0.012	0.457
1253	ID39250451	39250451	168	1.360	117.022	5.486	0	3843.008	8	0.500	1	-10921639	123.186	121	113	143	11949	6.387	0.484	0.008	0.309
1254	ID39073448	39073448	168	1.181	117.395	5.653	0	4323.384	9	0.500	1	-10921639	121.990	121	112	139	11833	5.702	0.719	0.012	0.493
1255	ID39259043	39259043	169	1.170	186.600	194.093	0	0.000	0	0.500	1	-10921639	122.134	121	107	167	11847	7.255	1.794	0.012	0.388
1256	ID39420757	39420757	169	1.375	189.797	192.560	0	480.376	1	0.500	1	-10921639	120.577	118	109	149	11696	7.766	1.411	0.007	0.208
1257	ID39281326	39281326	169	1.489	189.593	191.521	0	960.752	2	0.500	1	-10921639	121.784	121	109	140	11813	6.327	0.479	0.016	0.604
1258	ID39390053	39390053	169	1.617	189.471	191.718	0	1441.128	3	0.500	1	-10921639	121.124	120	109	141	11749	7.207	1.900	0.020	0.647
1259	ID39157157	39157157	170	1.559	210.045	72.108	0	0.000	0	0.500	1	-10921639	122.268	120	110	148	11860	7.035	0.492	0.008	0.292
1260	ID39329404	39329404	170	1.137	210.816	71.814	0	480.376	1	0.500	1	-10921639	120.237	120	110	139	11663	5.751	1.900	0.010	0.414
1261	ID39139945	39139945	170	1.417	210.314	71.055	0	960.752	2	0.500	1	-10921639	120.546	119	108	140	11693	6.773	1.791	0.014	0.497
1262	ID39110296	39110296	171	1.267	220.930	2.791	0	0.000	0	0.500	1	-10921639	122.052	122	108	143	11839	6.536	1.900	0.018	0.664
1263	ID39273086	39273086	171	1.541	221.758	2.708	0	480.376	1	0.500	1	-10921639	112.113	118	47	151	10875	20.418	1.787	0.062	0.642
1264	ID39089489	39089489	171	1.138	220.714	4.586	0	960.752	2	0.500	1	-10921639	118.423	118	106	134	11487	5.657	1.900	0.012	0.498
1265	ID39251943	39251943	172	2.044	208.102	187.088	0	0.000	0	0.500	1	-10921639	125.144	123	111	155	12139	8.597	0.487	0.015	0.441
1266	ID39418682	39418682	172	2.101	208.344	186.595	0	480.376	1	0.500	1	-10921639	124.536	122	112	158	12080	8.469	0.476	0.021	0.607
1267	ID39271664	39271664	172	2.317	208.861	186.765	0	960.752	2	0.500	1	-10921639	125.536	124	112	148	12177	8.926	0.483	0.023	0.644
1268	ID39393590	39393590	173	1.074	41.136	145.687	0	480.376	1	0.500	1	-10921639	121.082	119	110	141	11745	6.311	1.591	0.012	0.443
1269	ID39216308	39216308	173	1.064	41.096	145.515	0	960.752	2	0.500	1	-10921639	121.309	121	111	140	11767	5.537	0.495	0.009	0.398
1270	ID39283217	39283217	174	1.175	176.296	218.948	0	0.000	0	0.500	1	-10921639	123.134	122	111	153	11944	7.042	0.761	0.019	0.648
1271	ID39429158	39429158	174	1.122	176.552	219.388	0	480.376	1	0.500	1	-10921639	122.701	121	111	160	11902	7.529	1.900	0.013	0.420
1272	ID39304819	39304819	174	1.140	177.144	218.978	0	960.752	2	0.500	1	-10921639	123.320	122	112	157	11962	6.411	1.793	0.010	0.379
1273	ID39160447	39160447	175	1.116	120.348	83.003	0	0.000	0	0.500	1	-10921639	120.866	120	109	140	11724	5.638	1.900	0.012	0.502
1274	ID39343048	39343048	175	1.364	121.487	83.702	0	480.376	1	0.500	1	-10921639	119.835	118	109	145	11624	6.698	0.484	0.017	0.615
1275	ID39152069	39152069	175	1.163	120.921	83.196	0	960.752	2	0.500	1	-10921639	119.619	118	110	135	11603	6.006	1.587	0.016	0.614
1276	ID39204710	39204710	176	1.660	99.493	124.467	0	0.000	0	0.500	1	-10921639	121.948	121	109	145	11829	7.235	0.486	0.017	0.556
1277	ID39374585	39374585	176	1.546	100.142	124.421	0	480.376	1	0.500	1	-10921639	122.619	122	111	144	11894	6.811	0.492	0.018	0.626
1278	ID39193585	39193585	176	1.736	100.225	124.302	0	960.752	2	0.500	1	-10921639	122.845	121	111	141	11916	6.971	0.490	0.015	0.506
1279	ID39252067	39252067	177	1.070	56.768	187.281	0	0.000	0	0.500	1	-10921639	121.299	121	112	140	11766	5.502	1.592	0.007	0.320
1280	ID39418872	39418872	177	1.109	57.759	187.116	0	480.376	1	0.500	1	-10921639	120.835	120	111	141	11721	6.208	0.701	0.010	0.376
1281	ID39272655	39272655	177	1.463	58.664	187.507	0	960.752	2	0.500	1	-10921639	122.299	121	113	151	11863	6.916	0.490	0.013	0.446
1282	ID39186687	39186687	178	0.898	89.978	114.346	0	0.000	0	0.500	1	-10921639	118.711	117	109	137	11515	5.551	1.900	0.010	0.405
1283	ID39367670	39367670	178	1.002	90.530	113.995	0	480.376	1	0.500	1	-10921639	119.093	119	109	144	11552	5.948	1.900	0.005	0.196
1284	ID39182025	39182025	178	0.982	90.319	113.631	0	960.752	2	0.500	1	-10921639	119.897	119	110	144	11630	6.003	1.900	0.011	0.417
1285	ID39214296	39214296	179	1.156	176.819	134.287	0	0.000	0	0.500	1	-10921639	121.175	120	109	148	11754	6.168	1.791	0.013	0.497
1286	ID39389409	39389409	179	1.259	177.237	133.955	0	480.376	1	0.500	1	-10921639	120.526	120	107	146	11691	6.793	0.707	0.019	0.650
1287	ID39205545	39205545	179	1.448	177.513	133.834	0	960.752	2	0.500	1	-10921639	121.866	121	108	142	11821	7.098	0.497	0.016	0.550
1288	ID39337299	39337299	180	0.878	130.250	205.980	0	2882.256	6	0.500	1	-10921639	121.247	120	113	144	11761	5.232	1.776	0.008	0.382
1289	ID39226608	39226608	180	0.963	130.128	203.453	0	3362.632	7	0.500	1	-10921639	123.588	122	108	150	11988	7.658	1.811	0.011	0.357
1290	ID39289679	39289679	181	1.113	99.095	124.752	0	2882.256	6	0.500	1	-10921639	120.206	120	105	136	11660	5.754	0.490	0.013	0.520
1291	ID39156679	39156679	181	1.562	97.251	125.370	0	3362.632	7	0.500	1	-10921639	120.773	119	107	143	11715	7.329	0.484	0.019	0.612
1292	ID39353695	39353695	181	1.351	96.457	125.660	0	3843.008	8	0.500	1	-10921639	119.722	118	109	141	11613	6.658	1.900	0.014	0.484
1293	ID39158258	39158258	181	1.262	96.348	125.416	0	4323.384	9	0.500	1	-10921639	119.701	118	109	141	11611	6.307	1.775	0.015	0.570
1294	ID39277388	39277388	182	0.914	92.103	113.829	0	2882.256	6	0.500	1	-10921639	117.680	117	106	133	11415	5.584	0.482	0.007	0.307
1295	ID39143257	39143257	182	0.947	91.360	112.786	0	3362.632	7	0.500	1	-10921639	119.918	119	111	138	11632	5.408	1.700	0.012	0.533
1296	ID39340556	39340556	182	1.270	91.096	111.947	0	3843.008	8	0.500	1	-10921639	120.289	119	108	139	11668	6.341	0.491	0.013	0.479
1297	ID39138381	39138381	182	1.023	90.480	112.197	0	4323.384	9	0.500	1	-10921639	120.474	120	111	144	11686	5.420	1.706	0.010	0.437
1298	ID39141444	39141444	183	0.909	187.718	64.200	0	2401.880	5	0.500	1	-10921639	119.887	119	112	138	11629	4.780	1.599	0.007	0.357
1299	ID39220598	39220598	183	1.089	187.629	64.714	0	2882.256	6	0.500	1	-10921639	119.794	118	110	142	11620	5.662	1.772	0.012	0.487
1300	ID39103300	39103300	183	1.029	187.307	64.057	0	3362.632	7	0.500	1	-10921639	119.897	119	111	135	11630	5.386	1.900	0.008	0.352
1301	ID39308497	39308497	183	1.253	187.192	64.094	0	3843.008	8	0.500	1	-10921639	120.021	119	111	141	11642	5.813	0.491	0.013	0.538
1302	ID39091601	39091601	183	0.973	187.043	64.343	0	4323.384	9	0.500	1	-10921639	119.959	120	109	140	11636	5.016	0.487	0.010	0.455
1303	ID39155607	39155607	184	1.278	93.882	98.525	0	2401.880	5	0.500	1	-10921639	119.505	118	109	142	11592	6.792	0.710	0.014	0.500
1304	ID39252338	39252338	184	1.115	94.494	98.526	0	2882.256	6	0.500	1	-10921639	119.247	118	107	154	11567	6.937	1.085	0.007	0.252
1305	ID39133190	39133190	184	1.296	94.881	98.697	0	3362.632	7	0.500	1	-10921639	119.124	118	109	140	11555	6.224	0.487	0.013	0.473
1306	ID39284605	39284605	185	1.048	101.338	124.091	0	2882.256	6	0.500	1	-10921639	119.649	118	111	137	11606	5.881	0.494	0.008	0.323
1307	ID39152169	39152169	185	1.070	100.969	124.267	0	3362.632	7	0.500	1	-10921639	120.093	119	111	143	11649	6.217	1.671	0.011	0.411
1308	ID39348620	39348620	185	1.138	101.378	124.355	0	3843.008	8	0.500	1	-10921639	119.670	119	109	144	11608	7.047	1.401	0.008	0.262
1309	ID39157190	39157190	185	1.144	101.615	124.635	0	4323.384	9	0.500	1	-10921639	119.371	118	108	143	11579	6.269	1.283	0.009	0.344
1310	ID39222116	39222116	186	1.241	50.244	69.102	0	2882.256	6	0.500	1	-10921639	121.701	121	109	141	11805	5.927	0.707	0.017	0.703
1311	ID39109796	39109796	186	0.927	50.070	69.346	0	3362.632	7	0.500	1	-10921639	121.433	121	111	143	11779	5.248	1.597	0.004	0.205
1312	ID39316299	39316299	186	0.991	49.846	69.209	0	3843.008	8	0.500	1	-10921639	121.402	120	113	147	11776	6.350	1.399	0.005	0.193
1313	ID39093021	39093021	186	1.012	49.631	69.241	0	4323.384	9	0.500	1	-10921639	120.773	120	109	142	11715	5.446	0.490	0.011	0.503
1314	ID39335274	39335274	187	1.047	186.001	193.570	0	2882.256	6	0.500	1	-10921639	122.289	121	110	179	11862	7.806	1.395	0.008	0.238
1315	ID39211891	39211891	187	1.212	186.879	193.082	0	3362.632	7	0.500	1	-10921639	122.021	120	109	159	11836	7.313	0.487	0.015	0.496
1316	ID39389411	39389411	187	0.911	186.529	193.537	0	3843.008	8	0.500	1	-10921639	121.072	120	110	149	11744	6.322	1.692	0.013	0.480
1317	ID39235584	39235584	187	0.891	185.563	193.844	0	4323.384	9	0.500	1	-10921639	120.309	119	109	136	11670	5.071	1.900	0.010	0.455
1318	ID39299180	39299180	188	1.269	209.613	138.396	0	2882.256	6	0.500	1	-10921639	120.567	119	111	153	11695	6.939	1.687	0.007	0.252
1319	ID39160443	39160443	188	0.981	207.451	139.636	0	3362.632	7	0.500	1	-10921639	118.433	118	107	133	11488	5.014	1.827	0.011	0.507
1320	ID39359925	39359925	188	1.320	207.233	139.711	0	3843.008	8	0.500	1	-10921639	118.814	117	109	139	11525	6.418	0.474	0.009	0.344
1321	ID39174836	39174836	188	1.050	207.057	140.653	0	4323.384	9	0.500	1	-10921639	117.691	116	106	140	11416	6.381	0.492	0.007	0.254
1322	ID39121659	39121659	189	1.469	45.092	45.698	0	2401.880	5	0.500	1	-10921639	123.227	123	111	142	11953	6.772	0.726	0.024	0.861
1323	ID39207191	39207191	189	1.334	44.900	45.687	0	2882.256	6	0.500	1	-10921639	121.866	121	111	146	11821	6.911	0.705	0.009	0.327
1324	ID39096683	39096683	189	1.388	45.148	45.971	0	3362.632	7	0.500	1	-10921639	122.474	122	112	140	11880	6.511	1.759	0.012	0.451
1325	ID39299994	39299994	189	1.663	45.064	46.511	0	3843.008	8	0.500	1	-10921639	123.412	122	111	155	11971	7.919	0.489	0.019	0.584
1326	ID39078711	39078711	189	1.366	45.038	46.474	0	4323.384	9	0.500	1	-10921639	122.103	120	111	143	11844	6.763	0.494	0.012	0.422
1327	ID39274512	39274512	190	1.049	197.815	106.589	0	2882.256	6	0.500	1	-10921639	119.289	119	110	140	11571	5.786	1.900	0.009	0.365
1328	ID39130711	39130711	190	0.886	197.671	106.444	0	3362.632	7	0.500	1	-10921639	119.526	119	111	132	11594	4.918	1.805	0.006	0.274
1329	ID39342917	39342917	190	1.123	197.456	106.880	0	3843.008	8	0.500	1	-10921639	120.041	119	109	149	11644	6.103	1.900	0.015	0.569
1330	ID39137771	39137771	190	1.114	197.049	106.853	0	4323.384	9	0.500	1	-10921639	119.124	118	109	136	11555	6.183	0.494	0.014	0.534
1331	ID39187713	39187713	191	1.076	44.154	25.438	0	2882.256	6	0.500	1	-10921639	121.464	120	109	151	11782	6.418	1.900	0.011	0.406
1332	ID39082634	39082634	191	1.139	43.835	25.300	0	3362.632	7	0.500	1	-10921639	122.505	122	113	146	11883	5.979	1.782	0.008	0.311
1333	ID39281488	39281488	191	1.007	43.470	25.583	0	3843.008	8	0.500	1	-10921639	121.897	121	112	138	11824	5.480	1.779	0.007	0.327
1334	ID39301943	39301943	192	0.963	41.516	146.130	0	2882.256	6	0.500	1	-10921639	121.423	120	109	157	11778	6.737	1.805	0.007	0.264
1335	ID39171106	39171106	192	0.926	41.587	146.591	0	3362.632	7	0.500	1	-10921639	120.216	119	110	139	11661	5.639	1.900	0.008	0.355
1336	ID39366511	39366511	192	1.019	41.258	147.143	0	3843.008	8	0.500	1	-10921639	119.557	119	110	136	11597	5.056	1.900	0.007	0.322
1337	ID39187761	39187761	192	0.903	39.773	145.199	0	4323.384	9	0.500	1	-10921639	119.773	119	111	136	11618	5.715	0.493	0.007	0.285
1338	ID39189707	39189707	193	1.484	103.358	138.973	0	2401.880	5	0.500	1	-10921639	121.619	121	109	135	11797	6.427	1.900	0.018	0.663
1339	ID39295797	39295797	193	1.685	102.674	137.348	0	2882.256	6	0.500	1	-10921639	122.474	121	110	163	11880	8.150	0.482	0.019	0.558
1340	ID39160044	39160044	193	1.461	101.962	139.058	0	3362.632	7	0.500	1	-10921639	121.598	120	109	153	11795	6.687	0.489	0.013	0.458
1341	ID39360011	39360011	193	0.961	102.428	140.247	0	3843.008	8	0.500	1	-10921639	120.907	120	107	145	11728	5.587	1.839	0.005	0.201
1342	ID39178967	39178967	194	1.275	94.311	22.104	0	2882.256	6	0.500	1	-10921639	123.443	123	113	144	11974	6.149	0.494	0.013	0.508
1343	ID39083096	39083096	194	0.902	93.536	22.182	0	3362.632	7	0.500	1	-10921639	122.433	122	111	144	11876	5.452	1.402	0.010	0.446
1344	ID39269119	39269119	194	1.102	93.749	21.895	0	3843.008	8	0.500	1	-10921639	122.216	121	111	143	11855	5.897	0.460	0.009	0.364
1345	ID39075692	39075692	194	0.964	93.554	22.033	0	4323.384	9	0.500	1	-10921639	121.577	121	110	138	11793	5.408	1.817	0.007	0.318
1346	ID39165458	39165458	195	1.049	31.744	111.364	0	2401.880	5	0.500	1	-10921639	120.948	120	110	144	11732	6.058	1.784	0.009	0.357
1347	ID39268815	39268815	195	1.057	32.970	112.061	0	2882.256	6	0.500	1	-10921639	119.969	118	109	154	11637	6.037	1.812	0.010	0.403
1348	ID39142366	39142366	195	1.817	33.877	111.591	0	3362.632	7	0.500	1	-10921639	121.340	119	108	149	11770	8.601	1.835	0.024	0.650
1349	ID39340078	39340078	195	1.511	34.494	111.061	0	3843.008	8	0.500	1	-10921639	120.588	119	109	148	11697	7.421	0.490	0.018	0.589
1350	ID39142429	39142429	195	1.649	34.771	111.090	0	4323.384	9	0.500	1	-10921639	120.237	119	109	151	11663	7.486	1.615	0.021	0.657
1351	ID39163900	39163900	196	0.922	158.335	0.518	0	2882.256	6	0.500	1	-10921639	121.814	121	111	139	11816	5.382	1.697	0.011	0.483
1352	ID39077959	39077959	196	0.928	158.383	0.000	0	3362.632	7	0.500	1	-10921639	112.155	118	48	140	10879	19.370	1.792	0.053	0.580
1353	ID39133571	39133571	197	1.064	211.320	69.198	0	2401.880	5	0.500	1	-10921639	120.103	118	109	145	11650	6.867	0.710	0.009	0.317
1354	ID39222525	39222525	197	1.011	210.997	69.518	0	2882.256	6	0.500	1	-10921639	120.258	119	109	148	11665	6.267	1.685	0.011	0.412
1355	ID39105262	39105262	197	0.946	210.925	69.272	0	3362.632	7	0.500	1	-10921639	119.825	119	111	136	11623	5.573	0.494	0.011	0.449
1356	ID39316380	39316380	197	1.004	210.580	69.253	0	3843.008	8	0.500	1	-10921639	119.619	119	111	134	11603	5.324	1.722	0.010	0.438
1357	ID39092970	39092970	197	1.188	210.398	68.971	0	4323.384	9	0.500	1	-10921639	120.371	119	109	135	11676	5.756	0.708	0.012	0.505
1358	ID39310572	39310572	198	1.253	23.725	162.695	0	2882.256	6	0.500	1	-10921639	119.320	119	110	140	11574	6.147	1.900	0.017	0.633
1359	ID39185226	39185226	198	1.151	24.272	161.347	0	3362.632	7	0.500	1	-10921639	120.515	119	110	133	11690	5.048	0.486	0.013	0.633
1360	ID39375956	39375956	198	1.390	24.358	163.166	0	3843.008	8	0.500	1	-10921639	120.021	119	108	141	11642	6.639	0.701	0.012	0.417
1361	ID39204652	39204652	198	1.395	23.802	161.837	0	4323.384	9	0.500	1	-10921639	120.258	119	110	146	11665	6.462	0.490	0.015	0.537
1362	ID39315605	39315605	199	1.004	58.255	164.359	0	2882.256	6	0.500	1	-10921639	119.103	118	106	134	11553	5.749	1.816	0.012	0.490
1363	ID39188303	39188303	199	0.974	58.823	164.668	0	3362.632	7	0.500	1	-10921639	119.144	118	109	141	11557	5.690	0.494	0.011	0.465
1364	ID39372132	39372132	199	1.686	58.762	164.558	0	3843.008	8	0.500	1	-10921639	122.144	120	108	149	11848	7.036	0.490	0.020	0.691
1365	ID39208444	39208444	199	1.384	58.939	164.777	0	4323.384	9	0.500	1	-10921639	121.052	120	109	146	11742	7.054	0.716	0.010	0.352
1366	ID39244640	39244640	200	0.967	165.722	191.846	0	2401.880	5	0.500	1	-10921639	120.423	120	108	141	11681	5.573	0.482	0.012	0.492
1367	ID39326908	39326908	200	1.221	165.798	192.417	0	2882.256	6	0.500	1	-10921639	121.175	120	112	154	11754	6.625	1.637	0.016	0.587
1368	ID39210599	39210599	200	1.222	166.483	191.762	0	3362.632	7	0.500	1	-10921639	121.124	120	112	144	11749	5.901	1.400	0.010	0.390
1369	ID39391462	39391462	200	1.064	165.738	192.061	0	3843.008	8	0.500	1	-10921639	121.041	120	111	146	11741	5.886	0.491	0.009	0.347
1370	ID39338172	39338172	201	0.995	172.027	200.652	0	2882.256	6	0.500	1	-10921639	119.990	119	109	142	11639	6.427	0.497	0.009	0.315
1371	ID39216230	39216230	201	0.969	172.069	200.551	0	3362.632	7	0.500	1	-10921639	120.784	120	111	140	11716	5.911	0.486	0.011	0.447
1372	ID39398003	39398003	201	1.092	172.052	200.833	0	3843.008	8	0.500	1	-10921639	120.392	118	111	148	11678	6.414	1.900	0.013	0.490
1373	ID39101059	39101059	202	1.307	21.449	26.005	0	2401.880	5	0.500	1	-10921639	123.010	122	112	160	11932	6.917	0.489	0.010	0.347
1374	ID39188156	39188156	202	1.160	21.456	26.059	0	2882.256	6	0.500	1	-10921639	121.722	121	110	141	11807	6.226	1.699	0.008	0.328
1375	ID39082824	39082824	202	1.110	21.689	25.740	0	3362.632	7	0.500	1	-10921639	120.969	120	110	143	11734	5.871	0.710	0.011	0.445
1376	ID39280104	39280104	202	1.550	21.137	24.326	0	3843.008	8	0.500	1	-10921639	122.536	122	112	144	11886	6.699	0.704	0.009	0.341
1377	ID39075843	39075843	202	1.433	20.028	23.091	0	4323.384	9	0.500	1	-10921639	119.979	119	108	146	11638	6.694	1.900	0.018	0.637
1378	ID39122256	39122256	203	0.978	121.658	84.153	0	3362.632	7	0.500	1	-10921639	120.258	121	111	134	11665	5.083	0.496	0.010	0.465
1379	ID39319423	39319423	203	1.324	121.889	83.796	0	3843.008	8	0.500	1	-10921639	120.948	120	108	142	11732	6.236	1.900	0.019	0.708
1380	ID39113027	39113027	203	1.368	121.449	83.892	0	4323.384	9	0.500	1	-10921639	121.536	121	111	145	11789	6.146	0.492	0.011	0.413
1381	ID39165983	39165983	204	0.922	108.509	140.638	0	3362.632	7	0.500	1	-10921639	120.526	120	109	137	11691	5.575	0.492	0.010	0.447
1382	ID39361569	39361569	204	1.110	108.840	141.174	0	3843.008	8	0.500	1	-10921639	120.887	120	112	152	11726	6.225	0.712	0.012	0.452
1383	ID39175735	39175735	204	1.098	108.650	141.396	0	4323.384	9	0.500	1	-10921639	120.485	119	111	139	11687	5.557	0.708	0.009	0.389
1384	ID39077915	39077915	205	1.284	90.783	0.000	0	3362.632	7	0.500	1	-10921639	113.794	118	48	159	11038	20.276	1.794	0.056	0.596
1385	ID39233501	39233501	205	0.996	90.892	0.000	0	3843.008	8	0.500	1	-10921639	113.227	119	50	135	10983	19.344	1.794	0.052	0.582
1386	ID39071570	39071570	205	1.039	90.882	0.485	0	4323.384	9	0.500	1	-10921639	122.784	122	108	145	11910	6.726	1.900	0.010	0.377
1387	ID39087399	39087399	206	0.886	131.229	30.499	0	3362.632	7	0.500	1	-10921639	120.804	121	110	146	11718	5.807	1.674	0.008	0.317
1388	ID39287259	39287259	206	1.022	130.854	30.292	0	3843.008	8	0.500	1	-10921639	120.515	120	108	145	11690	6.110	0.466	0.012	0.453
1389	ID39076040	39076040	206	0.992	131.375	33.843	0	4323.384	9	0.500	1	-10921639	121.691	120	112	154	11804	6.571	0.700	0.009	0.317
1390	ID39083727	39083727	207	1.445	161.068	16.458	0	3362.632	7	0.500	1	-10921639	122.186	120	110	147	11852	7.680	0.483	0.015	0.466
1391	ID39267552	39267552	207	1.893	160.209	16.421	0	3843.008	8	0.500	1	-10921639	123.969	122	109	160	12025	8.917	0.709	0.022	0.597
1392	ID39073648	39073648	207	1.193	161.646	16.081	0	4323.384	9	0.500	1	-10921639	121.814	121	109	153	11816	7.114	1.704	0.012	0.401
1393	ID39233268	39233268	208	1.040	177.901	218.262	0	3362.632	7	0.500	1	-10921639	122.959	122	109	139	11927	5.568	0.489	0.011	0.493
1394	ID39408080	39408080	208	0.980	176.626	219.396	0	3843.008	8	0.500	1	-10921639	122.794	122	113	160	11911	6.960	0.706	0.012	0.417
1395	ID39189399	39189399	209	1.036	146.004	165.743	0	3362.632	7	0.500	1	-10921639	122.175	121	109	145	11851	5.590	1.900	0.015	0.638
1396	ID39374055	39374055	209	1.282	145.721	166.195	0	3843.008	8	0.500	1	-10921639	123.320	123	111	144	11962	6.314	0.473	0.009	0.362
1397	ID39209696	39209696	209	1.254	145.998	165.776	0	4323.384	9	0.500	1	-10921639	122.701	122	110	143	11902	5.688	0.492	0.011	0.481
1398	ID39235733	39235733	210	0.983	187.673	212.738	0	3362.632	7	0.500	1	-10921639	121.969	120	114	140	11831	5.552	1.783	0.012	0.535
1399	ID39403875	39403875	210	1.278	187.638	213.670	0	3843.008	8	0.500	1	-10921639	122.763	123	109	149	11908	7.044	1.900	0.016	0.554
1400	ID39277415	39277415	210	1.176	187.976	213.844	0	4323.384	9	0.500	1	-10921639	123.155	122	110	141	11946	6.009	0.707	0.016	0.644
1401	ID39170448	39170448	211	1.009	113.391	145.898	0	3362.632	7	0.500	1	-10921639	119.856	119	111	134	11626	5.066	1.809	0.013	0.613
1402	ID39364505	39364505	211	0.900	113.283	146.619	0	3843.008	8	0.500	1	-10921639	119.711	119	111	136	11612	5.599	0.478	0.008	0.338
1403	ID39214762	39214762	212	1.479	203.883	186.305	0	3362.632	7	0.500	1	-10921639	121.680	120	110	147	11803	7.155	0.483	0.014	0.484
1404	ID39390364	39390364	212	1.392	203.933	187.095	0	3843.008	8	0.500	1	-10921639	121.392	119	113	146	11775	6.885	0.478	0.013	0.456
1405	ID39232627	39232627	212	1.088	203.382	186.663	0	4323.384	9	0.500	1	-10921639	120.464	120	111	137	11685	5.725	0.484	0.009	0.368
1406	ID39255315	39255315	213	1.287	13.954	12.983	0	3843.008	8	0.500	1	-10921639	123.278	122	112	147	11958	6.309	1.818	0.009	0.355
1407	ID39072240	39072240	213	1.631	13.645	12.362	0	4323.384	9	0.500	1	-10921639	123.918	123	112	147	12020	7.372	0.482	0.018	0.585
1408	ID39396380	39396380	214	1.211	176.902	202.962	0	3843.008	8	0.500	1	-10921639	123.175	122	111	150	11948	7.084	1.589	0.017	0.574
1409	ID39262017	39262017	214	1.140	175.698	202.578	0	4323.384	9	0.500	1	-10921639	122.887	122	112	148	11920	6.562	0.704	0.009	0.320
1410	ID39406876	39406876	215	0.933	201.341	215.459	0	3843.008	8	0.500	1	-10921639	121.247	120	111	142	11761	5.542	1.460	0.008	0.335
1411	ID39280948	39280948	215	1.068	200.492	216.514	0	4323.384	9	0.500	1	-10921639	120.577	119	111	138	11696	6.290	1.641	0.012	0.438
1412	ID39336968	39336968	216	1.249	84.136	105.507	0	3843.008	8	0.500	1	-10921639	120.814	119	111	151	11719	6.345	1.796	0.011	0.427
1413	ID39122688	39122688	216	1.232	83.523	104.929	0	4323.384	9	0.500	1	-10921639	120.990	121	111	135	11736	5.722	1.792	0.013	0.529
1414	ID39248945	39248945	217	1.238	76.032	4.863	0	3843.008	8	0.500	1	-10921639	122.134	122	111	141	11847	6.011	0.712	0.013	0.539
1415	ID39073363	39073363	217	1.188	75.890	5.092	0	4323.384	9	0.500	1	-10921639	121.680	120	107	141	11803	6.256	0.702	0.012	0.463
1416	ID39360292	39360292	218	1.122	176.667	132.774	0	3843.008	8	0.500	1	-10921639	119.268	118	111	137	11569	5.355	0.493	0.011	0.504
1417	ID39165358	39165358	218	1.553	177.891	132.402	0	4323.384	9	0.500	1	-10921639	119.856	119	110	143	11626	6.909	1.595	0.018	0.610
1418	ID39304389	39304389	219	1.093	169.766	58.347	0	3843.008	8	0.500	1	-10921639	119.361	119	110	137	11578	5.812	1.823	0.007	0.289
1419	ID39088892	39088892	219	0.882	169.261	57.736	0	4323.384	9	0.500	1	-10921639	118.371	118	110	132	11482	5.085	0.701	0.010	0.473
1420	ID39280835	39280835	220	1.511	91.879	24.866	0	3843.008	8	0.500	1	-10921639	122.918	122	111	141	11923	6.857	0.703	0.009	0.321
1421	ID39076348	39076348	220	1.738	92.180	25.825	0	4323.384	9	0.500	1	-10921639	121.753	119	110	151	11810	8.115	0.483	0.017	0.498
1422	ID39259622	39259622	221	1.136	90.734	0.669	0	3843.008	8	0.500	1	-10921639	122.825	122	110	142	11914	6.669	1.900	0.007	0.268
1423	ID39071641	39071641	221	0.938	90.384	0.751	0	4323.384	9	0.500	1	-10921639	121.814	120	112	145	11816	6.254	1.396	0.005	0.210
1424	ID39377130	39377130	222	0.942	96.489	168.366	0	3843.008	8	0.500	1	-10921639	120.443	119	109	151	11683	6.017	1.900	0.007	0.264
1425	ID39214468	39214468	222	0.940	96.041	167.723	0	4323.384	9	0.500	1	-10921639	120.443	120	108	141	11683	6.119	1.813	0.013	0.504
1426	ID39314584	39314584	223	1.291	140.664	71.339	0	3843.008	8	0.500	1	-10921639	119.794	118	110	141	11620	6.291	0.489	0.016	0.592
1427	ID39093811	39093811	223	1.273	139.952	70.348	0	4323.384	9	0.500	1	-10921639	119.794	118	109	138	11620	6.278	1.810	0.018	0.690
1428	ID39276423	39276423	224	0.922	21.349	28.465	0	3843.008	8	0.500	1	-10921639	119.103	118	109	137	11553	5.683	0.489	0.010	0.401
1429	ID39077040	39077040	224	1.346	21.690	28.843	0	4323.384	9	0.500	1	-10921639	120.124	119	112	137	11652	6.214	1.590	0.014	0.526
1430	ID39357835	39357835	225	1.159	211.688	137.238	0	3843.008	8	0.500	1	-10921639	118.959	118	109	138	11539	5.649	0.487	0.015	0.612
1431	ID39171432	39171432	225	1.094	211.395	136.493	0	4323.384	9	0.500	1	-10921639	117.464	116	107	144	11394	6.193	0.482	0.008	0.311
1432	ID39233460	39233460	226	1.102	78.108	0.000	0	3843.008	8	0.500	1	-10921639	113.227	118	48	146	10983	19.927	1.795	0.050	0.538
1433	ID39071469	39071469	226	0.925	78.325	0.000	0	4323.384	9	0.500	1	-10921639	112.423	119	47	147	10905	19.640	1.791	0.048	0.520
1434	ID39320483	39320483	227	0.885	142.480	74.268	0	3843.008	8	0.500	1	-10921639	119.155	118	111	131	11558	5.071	1.900	0.010	0.481
1435	ID39101100	39101100	227	1.087	143.009	75.523	0	4323.384	9	0.500	1	-10921639	118.670	117	109	176	11511	7.971	1.794	0.014	0.425
1436	ID39401134	39401134	228	1.405	136.908	207.599	0	3843.008	8	0.500	1	-10921639	120.835	120	111	147	11721	6.274	0.483	0.012	0.469
1437	ID39263778	39263778	228	1.109	136.486	207.028	0	4323.384	9	0.500	1	-10921639	120.763	120	111	138	11714	6.137	0.488	0.008	0.328
1438	ID39194942	39194942	229	0.905	126.885	142.257	0	2401.880	5	0.500	1	-10921639	128.485	128	112	157	12463	6.215	1.900	0.007	0.291
1439	ID39300794	39300794	229	1.099	126.740	142.454	0	2882.256	6	0.500	1	-10921639	131.361	131	119	168	12742	7.488	1.783	0.004	0.144
1440	ID39257736	39257736	230	1.051	134.557	205.168	0	2401.880	5	0.500	1	-10921639	121.814	122	112	141	11816	5.407	1.379	0.013	0.573
1441	ID39341525	39341525	230	1.087	134.794	205.376	0	2882.256	6	0.500	1	-10921639	121.557	121	111	142	11791	5.743	1.900	0.013	0.538
1442	ID39181428	39181428	231	0.938	141.535	101.680	0	0.000	0	0.500	1	-10921639	120.464	121	110	149	11685	5.893	1.900	0.006	0.261
1443	ID39356974	39356974	231	1.019	141.683	100.829	0	480.376	1	0.500	1	-10921639	119.845	119	110	135	11625	5.983	0.489	0.011	0.434
1444	ID39257958	39257958	232	1.093	200.795	189.535	0	0.000	0	0.500	1	-10921639	122.031	121	110	141	11837	5.826	1.398	0.011	0.459
1445	ID39418049	39418049	232	1.415	202.265	189.462	0	480.376	1	0.500	1	-10921639	122.010	121	110	144	11835	6.896	1.605	0.015	0.509
1446	ID39125765	39125765	233	1.514	21.659	26.477	0	0.000	0	0.500	1	-10921639	123.361	122	112	150	11966	7.371	0.706	0.015	0.500
1447	ID39294212	39294212	233	1.644	22.091	26.519	0	480.376	1	0.500	1	-10921639	122.907	122	112	154	11922	7.962	0.480	0.012	0.374
1448	ID39149344	39149344	234	1.097	186.916	64.416	0	0.000	0	0.500	1	-10921639	119.742	119	110	141	11615	5.169	0.487	0.009	0.413
1449	ID39321233	39321233	234	1.077	187.991	64.453	0	480.376	1	0.500	1	-10921639	119.990	120	109	143	11639	5.720	1.900	0.007	0.273
1450	ID39211716	39211716	235	1.829	46.051	142.297	0	0.000	0	0.500	1	-10921639	124.515	123	110	156	12078	8.024	1.393	0.020	0.594
1451	ID39395836	39395836	235	1.981	45.877	142.180	0	480.376	1	0.500	1	-10921639	123.979	122	111	157	12026	8.275	0.490	0.022	0.636
1452	ID39109070	39109070	236	1.119	161.489	0.996	0	0.000	0	0.500	1	-10921639	122.113	122	111	144	11845	6.196	0.495	0.010	0.404
1453	ID39266854	39266854	236	0.879	162.783	0.829	0	480.376	1	0.500	1	-10921639	121.031	120	108	142	11740	5.897	1.718	0.010	0.393
1454	ID39226002	39226002	237	1.048	20.923	157.133	0	0.000	0	0.500	1	-10921639	120.340	120	110	144	11673	5.918	1.611	0.010	0.383
1455	ID39401902	39401902	237	1.412	21.674	157.544	0	480.376	1	0.500	1	-10921639	122.443	122	110	146	11877	6.724	1.824	0.018	0.661
