# Supplementary material for: The structure of the Ctf19c/CCAN from budding yeast
Source: eLife journal article supplement (doi:10.7554/elife.44239), 2019-02-14
Supplement: supp [file set3_s15_gfp.xls]

	Label	ID	TRACK_ID	QUALITY	POSITION_X	POSITION_Y	POSITION_Z	POSITION_T	FRAME	RADIUS	VISIBILITY	MANUAL_COLOR	MEAN_INTENSITY	MEDIAN_INTENSITY	MIN_INTENSITY	MAX_INTENSITY	TOTAL_INTENSITY	STANDARD_DEVIATION	ESTIMATED_DIAMETER	CONTRAST	SNR
1	ID37049140	37049140	0	4.695	53.780	109.241	0	0.000	0	0.500	1	-10921639	483.918	485	339	556	46940	30.672	1.394	0.005	0.167
2	ID36899152	36899152	0	4.762	54.110	109.093	0	480.397	1	0.500	1	-10921639	437.876	437	385	497	42474	25.700	0.729	0.016	0.522
3	ID37097778	37097778	1	5.750	216.695	173.141	0	0.000	0	0.500	1	-10921639	460.454	459	400	532	44664	29.389	1.900	0.017	0.533
4	ID36909320	36909320	1	3.887	217.209	172.723	0	480.397	1	0.500	1	-10921639	408.247	408	338	480	39600	22.475	0.713	0.011	0.400
5	ID37128626	37128626	2	3.997	20.563	220.671	0	0.000	0	0.500	1	-10921639	455.289	456	382	522	44163	28.971	1.841	0.010	0.307
6	ID36918480	36918480	2	4.015	20.367	221.325	0	480.397	1	0.500	1	-10921639	438.175	466	190	548	42503	76.930	1.795	0.051	0.552
7	ID37129144	37129144	2	5.900	20.258	221.325	0	960.794	2	0.500	1	-10921639	442.474	469	189	542	42920	77.225	1.791	0.045	0.497
8	ID37101206	37101206	2	5.550	20.475	221.325	0	1441.191	3	0.500	1	-10921639	430.711	457	182	515	41779	74.948	1.794	0.053	0.579
9	ID37244716	37244716	2	7.239	20.258	221.325	0	1921.588	4	0.500	1	-10921639	429.082	448	178	572	41621	78.250	1.788	0.050	0.525
10	ID37229953	37229953	2	6.008	20.475	221.325	0	2401.985	5	0.500	1	-10921639	410.381	433	174	504	39807	73.701	1.794	0.054	0.573
11	ID37037265	37037265	2	6.036	20.042	221.325	0	2882.382	6	0.500	1	-10921639	397.412	414	160	503	38549	71.404	1.790	0.056	0.585
12	ID37195555	37195555	2	5.644	20.367	221.325	0	3362.779	7	0.500	1	-10921639	375.649	395	153	481	36438	70.112	1.793	0.061	0.617
13	ID37239601	37239601	2	5.267	20.258	221.325	0	3843.176	8	0.500	1	-10921639	354.763	372	146	434	34412	64.661	1.787	0.051	0.528
14	ID36999986	36999986	3	4.947	69.199	37.173	0	0.000	0	0.500	1	-10921639	444.464	447	375	498	43113	27.082	1.808	0.012	0.397
15	ID36887858	36887858	3	7.409	67.156	38.409	0	480.397	1	0.500	1	-10921639	434.237	427	364	573	42121	37.349	1.592	0.019	0.444
16	ID36978426	36978426	3	6.761	67.502	38.228	0	960.794	2	0.500	1	-10921639	427.773	424	378	495	41494	26.193	0.490	0.016	0.501
17	ID36967364	36967364	3	8.313	67.885	38.392	0	1441.191	3	0.500	1	-10921639	417.433	411	322	550	40491	36.717	1.900	0.027	0.608
18	ID37158628	37158628	3	7.596	67.897	38.347	0	1921.588	4	0.500	1	-10921639	408.990	403	316	508	39672	32.536	1.806	0.017	0.416
19	ID37122184	37122184	3	5.866	67.797	37.744	0	2401.985	5	0.500	1	-10921639	395.794	394	349	470	38392	24.854	0.484	0.017	0.546
20	ID36926383	36926383	3	3.858	67.472	38.311	0	2882.382	6	0.500	1	-10921639	386.639	389	323	431	37504	20.348	0.497	0.014	0.535
21	ID37072436	37072436	3	5.993	68.179	38.974	0	3362.779	7	0.500	1	-10921639	377.144	372	319	440	36583	23.478	0.484	0.017	0.546
22	ID37135283	37135283	3	7.031	67.642	39.140	0	3843.176	8	0.500	1	-10921639	366.907	362	305	455	35590	28.783	1.803	0.019	0.467
23	ID36931082	36931082	3	5.953	67.108	39.364	0	4323.573	9	0.500	1	-10921639	340.454	340	293	442	33024	24.907	0.484	0.025	0.668
24	ID37096382	37096382	4	4.001	188.047	169.405	0	0.000	0	0.500	1	-10921639	406.629	407	354	472	39443	24.681	1.619	0.009	0.299
25	ID36908650	36908650	4	9.295	188.583	168.562	0	480.397	1	0.500	1	-10921639	406.454	402	331	516	39426	37.612	1.900	0.031	0.651
26	ID37088520	37088520	4	5.893	188.229	169.166	0	960.794	2	0.500	1	-10921639	385.742	383	335	487	37417	31.345	1.393	0.017	0.417
27	ID37076024	37076024	5	4.944	82.834	149.192	0	0.000	0	0.500	1	-10921639	473.835	473	384	549	45962	29.337	0.701	0.014	0.442
28	ID36905540	36905540	5	9.462	82.621	149.335	0	480.397	1	0.500	1	-10921639	448.990	444	344	575	43552	37.210	0.491	0.026	0.619
29	ID37071935	37071935	5	13.297	83.236	148.053	0	960.794	2	0.500	1	-10921639	456.546	443	381	628	44285	51.152	0.485	0.036	0.620
30	ID37052364	37052364	5	10.804	83.836	148.069	0	1441.191	3	0.500	1	-10921639	441.278	430	361	596	42804	44.153	1.777	0.026	0.509
31	ID37222059	37222059	5	8.842	83.022	147.805	0	1921.588	4	0.500	1	-10921639	426.845	423	374	541	41404	31.400	0.490	0.022	0.583
32	ID37201744	37201744	5	4.079	82.980	148.004	0	2401.985	5	0.500	1	-10921639	395.835	397	343	460	38396	24.057	1.604	0.008	0.263
33	ID37048891	37048891	6	6.264	212.446	105.394	0	0.000	0	0.500	1	-10921639	413.155	415	302	481	40076	28.123	0.487	0.017	0.489
34	ID36897464	36897464	6	4.003	213.771	105.054	0	480.397	1	0.500	1	-10921639	382.495	383	318	446	37102	24.738	1.601	0.010	0.319
35	ID37042490	37042490	7	10.690	44.292	102.845	0	0.000	0	0.500	1	-10921639	434.938	428	345	549	42189	41.362	0.483	0.032	0.644
36	ID36897296	36897296	7	9.576	44.697	103.823	0	480.397	1	0.500	1	-10921639	423.969	417	366	534	41125	36.371	0.484	0.024	0.538
37	ID37036424	37036424	7	5.319	45.234	102.826	0	960.794	2	0.500	1	-10921639	410.237	410	304	479	39793	27.052	1.784	0.014	0.410
38	ID37017002	37017002	7	3.912	45.736	103.046	0	1441.191	3	0.500	1	-10921639	413.000	412	356	487	40061	23.451	1.900	0.010	0.359
39	ID37197857	37197857	7	4.328	49.315	103.567	0	1921.588	4	0.500	1	-10921639	410.969	414	306	462	39864	26.386	1.900	0.016	0.504
40	ID37097657	37097657	8	7.343	109.540	173.048	0	0.000	0	0.500	1	-10921639	446.227	443	358	532	43284	30.884	0.493	0.023	0.642
41	ID36909292	36909292	8	4.692	110.191	172.538	0	480.397	1	0.500	1	-10921639	415.814	413	351	503	40334	25.892	1.774	0.013	0.397
42	ID37068199	37068199	9	5.749	216.410	136.612	0	0.000	0	0.500	1	-10921639	452.175	451	368	532	43861	29.113	1.634	0.011	0.346
43	ID36903132	36903132	9	4.147	216.865	136.111	0	480.397	1	0.500	1	-10921639	408.165	408	322	464	39592	23.411	0.723	0.008	0.292
44	ID37071782	37071782	10	4.391	199.329	142.509	0	0.000	0	0.500	1	-10921639	445.588	442	391	506	43222	25.841	1.900	0.007	0.255
45	ID36903557	36903557	10	4.652	199.973	142.387	0	480.397	1	0.500	1	-10921639	417.866	416	361	489	40533	23.748	1.593	0.012	0.406
46	ID37064173	37064173	10	3.807	200.179	141.969	0	960.794	2	0.500	1	-10921639	395.505	396	334	455	38364	23.328	1.388	0.017	0.573
47	ID37048344	37048344	10	6.166	202.573	139.382	0	1441.191	3	0.500	1	-10921639	406.000	404	343	526	39382	31.919	1.600	0.013	0.333
48	ID37220251	37220251	10	10.470	202.151	139.132	0	1921.588	4	0.500	1	-10921639	421.536	415	328	608	40889	43.213	0.712	0.028	0.531
49	ID37197377	37197377	10	11.071	202.889	139.311	0	2401.985	5	0.500	1	-10921639	403.588	392	326	592	39148	47.772	1.844	0.027	0.438
50	ID36974573	36974573	10	9.290	202.368	139.338	0	2882.382	6	0.500	1	-10921639	395.351	386	323	504	38349	36.867	0.477	0.027	0.569
51	ID37098030	37098030	11	5.481	173.753	173.452	0	0.000	0	0.500	1	-10921639	424.361	421	356	501	41163	27.872	1.900	0.015	0.455
52	ID36909396	36909396	11	5.145	174.333	173.192	0	480.397	1	0.500	1	-10921639	409.278	407	324	483	39700	28.046	1.679	0.018	0.510
53	ID37094214	37094214	11	4.460	174.445	172.944	0	960.794	2	0.500	1	-10921639	402.196	402	325	457	39013	26.946	0.696	0.012	0.345
54	ID37070648	37070648	11	4.397	174.656	172.965	0	1441.191	3	0.500	1	-10921639	397.938	398	336	482	38600	24.008	1.900	0.014	0.447
55	ID37234385	37234385	11	5.032	174.496	172.778	0	1921.588	4	0.500	1	-10921639	391.412	390	322	470	37967	26.156	1.588	0.014	0.406
56	ID37212062	37212062	11	5.906	174.415	172.917	0	2401.985	5	0.500	1	-10921639	384.495	378	317	495	37296	31.311	1.900	0.014	0.350
57	ID37002699	37002699	11	4.950	174.296	173.254	0	2882.382	6	0.500	1	-10921639	375.309	375	312	481	36405	27.226	1.900	0.014	0.375
58	ID37164060	37164060	11	4.817	174.316	173.286	0	3362.779	7	0.500	1	-10921639	359.536	355	270	435	34875	25.153	1.900	0.016	0.446
59	ID37220866	37220866	11	4.857	174.602	173.137	0	3843.176	8	0.500	1	-10921639	345.381	342	302	438	33502	25.417	0.480	0.016	0.427
60	ID37051564	37051564	12	7.250	149.568	113.751	0	0.000	0	0.500	1	-10921639	467.897	461	352	573	45386	34.911	0.483	0.018	0.466
61	ID36899019	36899019	12	5.965	149.952	113.241	0	480.397	1	0.500	1	-10921639	415.619	414	335	490	40315	28.319	1.810	0.018	0.525
62	ID37042214	37042214	12	6.079	149.887	113.953	0	960.794	2	0.500	1	-10921639	410.113	411	326	478	39781	28.987	1.803	0.017	0.465
63	ID37032726	37032726	12	8.491	152.262	114.043	0	1441.191	3	0.500	1	-10921639	415.443	412	316	517	40298	34.865	1.779	0.027	0.632
64	ID37200166	37200166	12	7.615	151.904	114.325	0	1921.588	4	0.500	1	-10921639	408.433	407	313	506	39618	34.417	0.485	0.030	0.696
65	ID37177277	37177277	12	6.017	151.894	112.910	0	2401.985	5	0.500	1	-10921639	387.134	388	308	453	37552	25.850	0.713	0.018	0.523
66	ID37131685	37131685	12	4.079	151.954	113.388	0	3362.779	7	0.500	1	-10921639	361.948	362	310	409	35109	20.883	1.808	0.017	0.567
67	ID37184719	37184719	12	4.450	151.607	112.908	0	3843.176	8	0.500	1	-10921639	339.969	339	285	410	32977	23.378	0.491	0.018	0.517
68	ID37122477	37122477	13	10.875	188.250	211.880	0	0.000	0	0.500	1	-10921639	443.134	429	367	554	42984	42.619	0.493	0.032	0.638
69	ID36917484	36917484	13	7.741	189.354	211.455	0	480.397	1	0.500	1	-10921639	410.227	407	314	499	39792	32.966	1.900	0.026	0.632
70	ID37123541	37123541	13	6.517	189.372	210.881	0	960.794	2	0.500	1	-10921639	408.258	403	335	509	39601	30.513	1.801	0.015	0.389
71	ID37098271	37098271	13	5.153	190.290	210.135	0	1441.191	3	0.500	1	-10921639	390.979	390	313	475	37925	24.838	0.714	0.015	0.462
72	ID37243164	37243164	13	5.103	189.693	209.743	0	1921.588	4	0.500	1	-10921639	385.464	380	334	433	37390	23.375	0.487	0.019	0.614
73	ID37130157	37130157	14	10.211	17.357	219.750	0	0.000	0	0.500	1	-10921639	478.134	486	360	550	46379	41.421	1.612	0.025	0.571
74	ID36917944	36917944	14	10.959	18.041	219.420	0	480.397	1	0.500	1	-10921639	468.918	469	389	554	45485	38.417	1.803	0.032	0.766
75	ID37127678	37127678	14	10.756	18.040	219.293	0	960.794	2	0.500	1	-10921639	465.082	465	379	536	45113	35.490	0.491	0.026	0.660
76	ID37103522	37103522	14	10.987	18.238	219.533	0	1441.191	3	0.500	1	-10921639	460.722	461	350	553	44690	38.373	0.715	0.028	0.650
77	ID37244166	37244166	14	11.675	18.127	219.411	0	1921.588	4	0.500	1	-10921639	454.062	455	367	561	44044	39.771	0.715	0.029	0.647
78	ID37228780	37228780	14	12.917	18.072	219.480	0	2401.985	5	0.500	1	-10921639	453.165	455	368	549	43957	39.630	0.712	0.035	0.776
79	ID37036234	37036234	14	12.408	17.926	219.701	0	2882.382	6	0.500	1	-10921639	439.814	438	354	531	42662	36.543	0.712	0.035	0.809
80	ID37194753	37194753	14	10.632	17.965	219.769	0	3362.779	7	0.500	1	-10921639	415.412	413	318	498	40295	32.787	1.590	0.033	0.813
81	ID37239202	37239202	14	8.614	18.159	219.903	0	3843.176	8	0.500	1	-10921639	394.010	390	346	449	38219	23.714	1.803	0.025	0.818
82	ID37061282	37061282	14	5.505	17.844	219.777	0	4323.573	9	0.500	1	-10921639	354.784	355	303	403	34414	19.151	1.396	0.020	0.731
83	ID36978089	36978089	15	4.048	127.470	2.701	0	0.000	0	0.500	1	-10921639	489.948	490	426	555	47525	25.674	1.792	0.006	0.246
84	ID36881208	36881208	15	4.077	127.836	3.087	0	480.397	1	0.500	1	-10921639	434.330	432	379	494	42130	22.196	1.799	0.006	0.214
85	ID37126696	37126696	16	8.684	126.032	217.949	0	0.000	0	0.500	1	-10921639	427.186	419	347	593	41437	43.266	1.817	0.024	0.472
86	ID36919059	36919059	16	6.008	127.033	218.238	0	480.397	1	0.500	1	-10921639	397.763	390	319	511	38583	32.163	0.488	0.014	0.347
87	ID37126132	37126132	16	6.881	127.656	217.328	0	960.794	2	0.500	1	-10921639	398.804	391	349	492	38684	31.768	0.488	0.024	0.577
88	ID37101985	37101985	16	4.103	127.895	217.104	0	1441.191	3	0.500	1	-10921639	390.371	387	315	472	37866	23.176	0.704	0.006	0.187
89	ID37244943	37244943	16	6.746	127.601	217.114	0	1921.588	4	0.500	1	-10921639	401.103	394	328	490	38907	27.667	0.486	0.024	0.680
90	ID37226843	37226843	16	5.034	127.285	217.276	0	2401.985	5	0.500	1	-10921639	396.577	397	357	461	38468	21.488	1.809	0.014	0.517
91	ID37032425	37032425	16	4.713	127.243	217.471	0	2882.382	6	0.500	1	-10921639	383.113	382	326	445	37162	22.235	1.900	0.014	0.481
92	ID37192892	37192892	16	6.332	127.439	218.169	0	3362.779	7	0.500	1	-10921639	374.680	373	312	443	36344	27.967	0.487	0.024	0.635
93	ID37238429	37238429	16	4.890	127.321	217.570	0	3843.176	8	0.500	1	-10921639	355.670	353	311	408	34500	22.685	1.900	0.018	0.559
94	ID37058576	37058576	16	5.700	127.090	218.186	0	4323.573	9	0.500	1	-10921639	344.340	344	274	418	33401	24.402	0.489	0.017	0.472
95	ID37080234	37080234	17	3.831	87.689	148.273	0	0.000	0	0.500	1	-10921639	495.443	491	429	603	48058	30.724	1.617	0.004	0.119
96	ID36904879	36904879	17	3.765	86.873	147.662	0	480.397	1	0.500	1	-10921639	459.186	460	337	524	44541	28.895	1.900	0.009	0.271
97	ID37071613	37071613	17	4.196	86.777	147.457	0	960.794	2	0.500	1	-10921639	441.722	444	343	536	42847	27.589	1.675	0.008	0.240
98	ID37056700	37056700	17	4.641	87.453	148.319	0	1441.191	3	0.500	1	-10921639	434.680	435	361	517	42164	27.220	1.799	0.015	0.480
99	ID37223769	37223769	17	4.641	86.893	147.995	0	1921.588	4	0.500	1	-10921639	424.010	424	302	494	41129	27.228	0.707	0.008	0.250
100	ID37205546	37205546	17	6.310	83.997	149.314	0	2401.985	5	0.500	1	-10921639	409.670	405	368	544	39738	30.019	1.900	0.012	0.325
101	ID36986395	36986395	17	5.299	83.721	149.585	0	2882.382	6	0.500	1	-10921639	398.732	401	344	460	38677	26.110	1.900	0.010	0.293
102	ID37151731	37151731	17	4.996	83.812	149.844	0	3362.779	7	0.500	1	-10921639	381.361	380	331	440	36992	23.935	0.697	0.010	0.328
103	ID37118889	37118889	18	8.147	201.486	206.620	0	0.000	0	0.500	1	-10921639	411.289	410	347	488	39895	33.044	1.592	0.022	0.547
104	ID36916290	36916290	18	7.714	202.717	207.617	0	480.397	1	0.500	1	-10921639	401.546	395	357	519	38950	31.490	0.478	0.017	0.431
105	ID37081749	37081749	19	5.441	175.101	153.201	0	0.000	0	0.500	1	-10921639	437.072	437	355	491	42396	22.995	1.400	0.017	0.638
106	ID36905161	36905161	19	3.738	175.898	152.518	0	480.397	1	0.500	1	-10921639	395.186	392	306	457	38333	24.657	1.586	0.010	0.312
107	ID37076304	37076304	19	3.977	175.641	152.928	0	960.794	2	0.500	1	-10921639	387.351	389	335	481	37573	24.167	1.591	0.015	0.464
108	ID37063869	37063869	19	4.626	178.750	153.824	0	1441.191	3	0.500	1	-10921639	404.701	405	348	460	39256	22.348	1.900	0.013	0.477
109	ID37230650	37230650	19	3.764	178.891	153.550	0	1921.588	4	0.500	1	-10921639	392.546	390	320	455	38077	23.730	1.396	0.013	0.426
110	ID37204977	37204977	19	4.758	177.824	154.160	0	2401.985	5	0.500	1	-10921639	377.701	376	307	448	36637	23.777	1.900	0.016	0.510
111	ID36988576	36988576	19	7.495	176.543	155.457	0	2882.382	6	0.500	1	-10921639	373.361	370	265	478	36216	31.747	0.478	0.024	0.552
112	ID37160310	37160310	19	9.556	175.853	156.111	0	3362.779	7	0.500	1	-10921639	364.763	354	316	522	35382	37.160	0.487	0.022	0.418
113	ID37206061	37206061	19	7.228	176.303	156.212	0	3843.176	8	0.500	1	-10921639	343.124	337	300	447	33283	28.599	1.788	0.031	0.712
114	ID37005471	37005471	19	5.735	175.689	155.289	0	4323.573	9	0.500	1	-10921639	323.784	319	275	398	31407	24.003	0.708	0.018	0.481
115	ID37037460	37037460	20	4.267	107.161	91.305	0	0.000	0	0.500	1	-10921639	458.381	461	363	553	44463	28.393	1.794	0.008	0.247
116	ID36895795	36895795	20	4.335	107.101	91.300	0	480.397	1	0.500	1	-10921639	427.433	426	362	494	41461	24.098	1.900	0.005	0.191
117	ID37046291	37046291	21	3.754	208.185	102.209	0	0.000	0	0.500	1	-10921639	421.660	421	321	480	40901	27.991	1.210	0.006	0.169
118	ID36897237	36897237	21	4.031	208.321	102.152	0	480.397	1	0.500	1	-10921639	401.010	403	313	461	38898	26.954	1.399	0.012	0.345
119	ID36991644	36991644	22	4.489	164.172	29.786	0	0.000	0	0.500	1	-10921639	450.103	449	330	541	43660	28.381	1.900	0.016	0.497
120	ID36884860	36884860	22	3.874	165.606	27.147	0	480.397	1	0.500	1	-10921639	388.072	389	317	440	37643	21.818	1.812	0.014	0.480
121	ID36952844	36952844	22	3.813	164.710	28.866	0	1441.191	3	0.500	1	-10921639	387.165	385	328	447	37555	23.566	1.611	0.016	0.506
122	ID37152346	37152346	22	4.728	165.964	27.353	0	1921.588	4	0.500	1	-10921639	378.990	381	288	439	36762	25.170	1.900	0.013	0.398
123	ID37109708	37109708	22	5.412	166.881	26.463	0	2401.985	5	0.500	1	-10921639	370.464	367	316	434	35935	23.028	0.481	0.019	0.586
124	ID36922931	36922931	22	5.134	166.691	26.327	0	2882.382	6	0.500	1	-10921639	359.320	358	295	422	34854	23.186	0.479	0.016	0.502
125	ID37022748	37022748	23	14.797	113.733	68.266	0	0.000	0	0.500	1	-10921639	485.000	473	393	664	47045	50.698	0.486	0.035	0.645
126	ID36892316	36892316	23	8.898	114.374	68.232	0	480.397	1	0.500	1	-10921639	441.443	434	379	592	42820	33.513	0.483	0.021	0.544
127	ID37005558	37005558	23	6.319	114.807	67.731	0	960.794	2	0.500	1	-10921639	422.763	418	340	530	41008	27.981	0.711	0.018	0.528
128	ID36985116	36985116	23	6.552	115.149	68.151	0	1441.191	3	0.500	1	-10921639	419.742	419	347	496	40715	29.740	1.776	0.027	0.754
129	ID37181688	37181688	23	5.523	115.033	68.067	0	1921.588	4	0.500	1	-10921639	407.186	404	345	479	39497	26.926	0.491	0.017	0.515
130	ID37145068	37145068	23	4.225	114.700	67.912	0	2401.985	5	0.500	1	-10921639	403.000	402	308	461	39091	23.112	1.824	0.012	0.405
131	ID37129244	37129244	24	3.885	210.600	221.325	0	0.000	0	0.500	1	-10921639	378.072	399	160	455	36673	66.794	1.787	0.042	0.459
132	ID36918709	36918709	24	9.226	211.900	221.325	0	480.397	1	0.500	1	-10921639	365.093	376	138	537	35414	75.388	1.792	0.057	0.520
133	ID37129088	37129088	24	12.927	212.401	221.154	0	960.794	2	0.500	1	-10921639	411.278	397	306	585	39894	52.683	1.396	0.041	0.610
134	ID37101509	37101509	24	11.920	211.683	221.325	0	1441.191	3	0.500	1	-10921639	389.619	394	157	565	37793	81.186	0.716	0.086	0.763
135	ID37244685	37244685	24	7.423	211.236	220.743	0	1921.588	4	0.500	1	-10921639	393.412	388	310	560	38161	36.630	1.900	0.028	0.594
136	ID37065755	37065755	25	4.288	82.169	126.259	0	0.000	0	0.500	1	-10921639	449.701	451	384	507	43621	23.510	1.698	0.009	0.358
137	ID36901370	36901370	25	5.539	83.018	125.811	0	480.397	1	0.500	1	-10921639	432.649	433	364	483	41967	25.856	1.693	0.016	0.515
138	ID37053422	37053422	25	4.880	83.308	125.050	0	960.794	2	0.500	1	-10921639	413.639	411	326	471	40123	26.413	0.494	0.015	0.477
139	ID37039195	37039195	25	3.779	83.372	124.878	0	1441.191	3	0.500	1	-10921639	405.526	407	316	461	39336	27.116	0.724	0.011	0.330
140	ID37208725	37208725	25	4.004	83.050	125.037	0	1921.588	4	0.500	1	-10921639	389.299	389	316	474	37762	26.121	1.398	0.010	0.303
141	ID36996741	36996741	26	15.449	66.377	38.837	0	0.000	0	0.500	1	-10921639	503.546	491	392	699	48844	56.355	0.482	0.039	0.674
142	ID36887467	36887467	26	4.106	66.710	39.505	0	480.397	1	0.500	1	-10921639	426.299	425	364	493	41351	23.524	0.719	0.012	0.417
143	ID37072000	37072000	27	4.784	90.141	142.835	0	0.000	0	0.500	1	-10921639	470.330	469	388	555	45622	29.871	0.498	0.015	0.463
144	ID36904017	36904017	27	4.219	89.045	140.716	0	480.397	1	0.500	1	-10921639	447.351	445	392	580	43393	27.545	1.587	0.007	0.210
145	ID37066130	37066130	27	3.986	88.872	140.520	0	960.794	2	0.500	1	-10921639	433.701	431	390	481	42069	20.594	1.764	0.003	0.110
146	ID37067267	37067267	28	4.960	75.446	131.999	0	0.000	0	0.500	1	-10921639	446.423	447	334	512	43303	28.952	1.672	0.011	0.340
147	ID36902649	36902649	28	4.959	76.195	132.162	0	480.397	1	0.500	1	-10921639	427.299	431	371	493	41448	24.648	1.825	0.017	0.592
148	ID37060235	37060235	28	4.724	75.291	132.209	0	960.794	2	0.500	1	-10921639	407.856	408	334	479	39562	23.494	1.715	0.017	0.567
149	ID37043597	37043597	29	11.676	202.754	98.539	0	0.000	0	0.500	1	-10921639	431.629	424	330	574	41868	47.556	1.794	0.024	0.419
150	ID36895548	36895548	29	8.522	203.572	97.886	0	480.397	1	0.500	1	-10921639	396.268	392	309	571	38438	37.728	0.489	0.026	0.537
151	ID37029185	37029185	29	7.438	202.472	97.486	0	960.794	2	0.500	1	-10921639	404.443	401	307	505	39231	32.109	1.597	0.022	0.550
152	ID37014343	37014343	29	8.523	202.182	97.455	0	1441.191	3	0.500	1	-10921639	403.247	400	342	518	39115	33.413	0.488	0.026	0.611
153	ID37198783	37198783	29	6.581	202.472	97.448	0	1921.588	4	0.500	1	-10921639	386.216	389	287	499	37463	34.441	1.822	0.019	0.421
154	ID37169027	37169027	29	5.760	203.083	98.073	0	2401.985	5	0.500	1	-10921639	382.639	383	321	465	37116	26.450	1.900	0.023	0.653
155	ID37119263	37119263	29	4.397	202.437	98.156	0	3362.779	7	0.500	1	-10921639	352.598	352	299	442	34202	25.291	0.712	0.014	0.395
156	ID37174574	37174574	29	5.420	203.300	98.250	0	3843.176	8	0.500	1	-10921639	338.165	340	251	406	32802	27.455	1.604	0.022	0.535
157	ID36966490	36966490	29	5.322	202.514	98.305	0	4323.573	9	0.500	1	-10921639	321.732	320	246	395	31208	25.009	0.484	0.012	0.316
158	ID37000079	37000079	30	6.261	119.035	37.268	0	0.000	0	0.500	1	-10921639	442.186	440	377	518	42892	29.674	1.399	0.022	0.650
159	ID36886179	36886179	30	9.195	119.696	36.466	0	480.397	1	0.500	1	-10921639	431.454	426	354	533	41851	34.681	0.486	0.024	0.573
160	ID36977953	36977953	30	4.361	120.401	35.992	0	960.794	2	0.500	1	-10921639	408.227	405	348	467	39598	24.951	1.596	0.017	0.562
161	ID36958718	36958718	30	7.801	120.389	37.205	0	1441.191	3	0.500	1	-10921639	406.474	400	317	528	39428	34.591	1.840	0.017	0.396
162	ID37100811	37100811	31	4.634	216.773	180.302	0	0.000	0	0.500	1	-10921639	434.000	435	362	498	42098	25.562	0.485	0.009	0.299
163	ID36910183	36910183	31	3.997	217.971	179.715	0	480.397	1	0.500	1	-10921639	410.856	412	335	489	39853	24.917	1.593	0.014	0.463
164	ID37098343	37098343	31	6.262	218.320	179.403	0	960.794	2	0.500	1	-10921639	402.340	400	332	500	39027	27.292	0.490	0.019	0.544
165	ID37078951	37078951	31	5.532	219.161	180.583	0	1441.191	3	0.500	1	-10921639	398.557	398	327	477	38660	26.684	1.900	0.021	0.618
166	ID37236636	37236636	31	4.463	218.949	181.072	0	1921.588	4	0.500	1	-10921639	386.814	385	303	452	37521	24.153	1.773	0.015	0.479
167	ID37217716	37217716	31	8.133	217.414	184.030	0	2401.985	5	0.500	1	-10921639	386.887	381	308	488	37528	33.667	1.900	0.023	0.515
168	ID37009281	37009281	31	9.007	216.033	183.975	0	2882.382	6	0.500	1	-10921639	371.320	364	310	483	36018	34.301	0.481	0.025	0.538
169	ID37171965	37171965	31	7.327	216.615	183.607	0	3362.779	7	0.500	1	-10921639	370.268	365	313	456	35916	28.448	0.484	0.020	0.514
170	ID37222651	37222651	31	4.990	216.961	184.156	0	3843.176	8	0.500	1	-10921639	344.866	343	273	406	33452	25.055	1.839	0.018	0.486
171	ID37035123	37035123	31	3.731	216.773	184.046	0	4323.573	9	0.500	1	-10921639	327.897	325	284	397	31806	21.691	1.900	0.012	0.356
172	ID36988043	36988043	32	5.683	105.183	25.670	0	0.000	0	0.500	1	-10921639	473.155	475	408	536	45896	27.704	0.721	0.012	0.399
173	ID36885109	36885109	32	5.231	105.092	24.998	0	480.397	1	0.500	1	-10921639	448.505	447	379	535	43505	29.084	1.598	0.015	0.466
174	ID36967204	36967204	32	7.743	103.766	23.578	0	960.794	2	0.500	1	-10921639	429.454	423	365	532	41657	32.617	0.482	0.019	0.481
175	ID36948261	36948261	32	7.988	104.116	23.410	0	1441.191	3	0.500	1	-10921639	423.804	420	360	523	41109	31.379	0.718	0.021	0.557
176	ID37153168	37153168	32	11.765	103.974	23.845	0	1921.588	4	0.500	1	-10921639	430.670	424	330	544	41775	39.991	1.900	0.035	0.736
177	ID37100559	37100559	32	6.958	103.948	23.998	0	2401.985	5	0.500	1	-10921639	413.227	410	342	517	40083	27.586	1.900	0.016	0.463
178	ID37038709	37038709	33	14.659	98.256	94.777	0	0.000	0	0.500	1	-10921639	422.247	412	341	551	40958	45.844	0.490	0.044	0.778
179	ID36896025	36896025	33	11.022	98.911	94.456	0	480.397	1	0.500	1	-10921639	403.196	397	301	565	39110	39.622	0.483	0.032	0.635
180	ID37026300	37026300	33	10.879	98.900	94.332	0	960.794	2	0.500	1	-10921639	397.361	393	315	480	38544	35.466	0.714	0.036	0.775
181	ID37015791	37015791	33	7.204	99.138	94.391	0	1441.191	3	0.500	1	-10921639	381.866	380	329	481	37041	27.600	1.796	0.026	0.695
182	ID37192178	37192178	33	7.113	99.037	94.316	0	1921.588	4	0.500	1	-10921639	375.670	375	321	471	36440	27.073	0.715	0.026	0.699
183	ID37166226	37166226	33	5.958	98.999	94.449	0	2401.985	5	0.500	1	-10921639	365.608	362	295	425	35464	25.105	0.710	0.023	0.656
184	ID36947901	36947901	33	8.980	98.853	94.485	0	2882.382	6	0.500	1	-10921639	372.010	364	316	475	36085	33.805	0.483	0.033	0.700
185	ID37122654	37122654	33	7.257	98.982	94.620	0	3362.779	7	0.500	1	-10921639	356.938	356	263	430	34623	30.219	0.490	0.033	0.765
186	ID37171147	37171147	33	7.809	98.999	94.653	0	3843.176	8	0.500	1	-10921639	347.278	345	248	432	33686	30.975	1.607	0.022	0.481
187	ID36959463	36959463	33	8.790	98.588	94.666	0	4323.573	9	0.500	1	-10921639	335.351	328	269	425	32529	30.727	0.484	0.027	0.580
188	ID37074677	37074677	34	3.866	196.567	140.609	0	0.000	0	0.500	1	-10921639	483.134	485	414	545	46864	25.251	1.900	0.004	0.145
189	ID36904452	36904452	34	5.063	196.779	139.637	0	480.397	1	0.500	1	-10921639	437.433	436	347	493	42431	24.744	1.900	0.013	0.442
190	ID37065950	37065950	34	5.380	196.872	139.667	0	960.794	2	0.500	1	-10921639	430.134	431	331	502	41723	27.141	1.602	0.014	0.435
191	ID37048260	37048260	34	6.144	196.766	139.488	0	1441.191	3	0.500	1	-10921639	420.876	418	370	511	40825	25.258	0.490	0.015	0.507
192	ID37220893	37220893	34	4.638	196.700	139.458	0	1921.588	4	0.500	1	-10921639	410.608	407	358	480	39829	24.816	1.384	0.014	0.472
193	ID37197624	37197624	34	6.514	196.770	139.833	0	2401.985	5	0.500	1	-10921639	401.577	398	336	483	38953	30.078	1.300	0.021	0.548
194	ID36980444	36980444	34	5.491	195.378	140.901	0	2882.382	6	0.500	1	-10921639	390.165	390	314	469	37846	25.961	0.478	0.012	0.346
195	ID36974859	36974859	34	4.549	196.475	139.607	0	2882.382	6	0.500	1	-10921639	384.454	386	307	446	37292	23.157	1.900	0.014	0.475
196	ID37155352	37155352	34	5.039	194.764	141.474	0	3362.779	7	0.500	1	-10921639	368.000	366	307	450	35696	22.953	0.709	0.015	0.485
197	ID37201728	37201728	34	7.606	195.118	143.087	0	3843.176	8	0.500	1	-10921639	349.505	346	286	478	33902	34.025	0.490	0.023	0.459
198	ID36994596	36994596	34	4.404	194.433	141.247	0	4323.573	9	0.500	1	-10921639	328.309	325	235	402	31846	25.272	1.900	0.014	0.358
199	ID36973937	36973937	35	6.067	105.188	6.341	0	0.000	0	0.500	1	-10921639	455.773	456	386	534	44210	26.378	1.406	0.013	0.457
200	ID36881549	36881549	35	5.339	106.094	6.466	0	480.397	1	0.500	1	-10921639	423.309	423	369	476	41061	23.573	0.709	0.018	0.651
201	ID36953173	36953173	35	4.961	105.905	5.619	0	960.794	2	0.500	1	-10921639	403.577	405	334	478	39147	29.011	1.900	0.015	0.398
202	ID36941652	36941652	35	4.369	105.920	5.572	0	1441.191	3	0.500	1	-10921639	397.825	395	311	451	38589	26.729	1.781	0.009	0.258
203	ID37140188	37140188	35	5.075	105.885	5.504	0	1921.588	4	0.500	1	-10921639	396.742	400	302	460	38484	23.664	0.481	0.016	0.525
204	ID37084701	37084701	35	4.155	105.830	5.628	0	2401.985	5	0.500	1	-10921639	380.546	381	284	448	36913	24.552	1.202	0.004	0.123
205	ID37121776	37121776	36	5.260	194.857	210.951	0	0.000	0	0.500	1	-10921639	441.866	442	396	507	42861	25.684	1.613	0.010	0.330
206	ID36917243	36917243	36	5.512	195.597	210.662	0	480.397	1	0.500	1	-10921639	405.392	404	346	460	39323	27.163	0.490	0.024	0.710
207	ID37092637	37092637	36	4.770	196.192	209.601	0	1441.191	3	0.500	1	-10921639	391.072	389	337	448	37934	22.637	1.818	0.014	0.462
208	ID37243081	37243081	36	5.560	196.095	209.275	0	1921.588	4	0.500	1	-10921639	383.464	382	339	451	37196	21.593	0.489	0.021	0.723
209	ID37120625	37120625	37	11.157	128.084	204.231	0	0.000	0	0.500	1	-10921639	464.907	457	398	586	45096	40.001	1.610	0.028	0.632
210	ID36914124	36914124	37	9.748	128.622	203.477	0	480.397	1	0.500	1	-10921639	414.278	411	346	548	40185	38.043	1.900	0.030	0.630
211	ID37113227	37113227	37	7.303	128.384	204.104	0	960.794	2	0.500	1	-10921639	419.299	418	345	493	40672	29.188	1.197	0.008	0.223
212	ID37093874	37093874	37	10.279	128.225	205.224	0	1441.191	3	0.500	1	-10921639	422.031	411	363	578	40937	39.171	0.491	0.030	0.630
213	ID37241912	37241912	37	9.760	128.716	205.192	0	1921.588	4	0.500	1	-10921639	411.515	406	345	517	39917	36.079	0.485	0.030	0.662
214	ID37225510	37225510	37	7.283	128.899	205.418	0	2401.985	5	0.500	1	-10921639	391.918	390	304	481	38016	29.470	0.485	0.024	0.627
215	ID37026480	37026480	37	6.500	127.800	205.634	0	2882.382	6	0.500	1	-10921639	387.010	384	327	472	37540	26.013	1.784	0.017	0.484
216	ID37184550	37184550	37	5.753	128.994	205.187	0	3362.779	7	0.500	1	-10921639	369.990	367	307	456	35889	28.923	1.584	0.017	0.422
217	ID37081852	37081852	38	4.958	177.506	153.345	0	0.000	0	0.500	1	-10921639	465.773	469	381	530	45180	26.708	1.618	0.010	0.354
218	ID36906642	36906642	38	3.790	177.950	153.210	0	480.397	1	0.500	1	-10921639	421.691	425	347	471	40904	22.172	1.694	-4.935E-4	-0.019
219	ID36978686	36978686	39	4.748	103.010	7.745	0	0.000	0	0.500	1	-10921639	440.979	439	371	491	42775	28.717	1.625	0.010	0.292
220	ID36881634	36881634	39	4.343	103.679	7.464	0	480.397	1	0.500	1	-10921639	417.155	417	341	466	40464	23.772	1.396	0.017	0.579
221	ID36999800	36999800	40	5.655	203.213	37.082	0	0.000	0	0.500	1	-10921639	425.474	424	370	502	41271	26.159	1.402	0.017	0.552
222	ID36886231	36886231	40	4.256	203.949	36.570	0	480.397	1	0.500	1	-10921639	409.979	405	363	477	39768	21.408	1.787	0.012	0.449
223	ID36976104	36976104	40	5.295	204.324	36.375	0	960.794	2	0.500	1	-10921639	408.722	406	360	493	39646	23.793	1.681	0.015	0.506
224	ID36957958	36957958	40	5.921	204.499	36.121	0	1441.191	3	0.500	1	-10921639	406.093	401	344	500	39391	25.260	1.386	0.011	0.354
225	ID37156628	37156628	40	3.737	206.011	35.353	0	1921.588	4	0.500	1	-10921639	362.649	362	323	422	35177	19.621	1.900	0.009	0.343
226	ID37162155	37162155	40	4.049	204.057	36.343	0	1921.588	4	0.500	1	-10921639	385.948	386	326	462	37437	20.870	1.400	0.006	0.225
227	ID37118883	37118883	40	3.742	204.503	36.072	0	2401.985	5	0.500	1	-10921639	375.794	374	308	442	36452	21.388	1.900	0.014	0.486
228	ID37121184	37121184	40	3.887	203.959	36.643	0	2401.985	5	0.500	1	-10921639	373.928	371	335	458	36271	21.845	1.900	0.010	0.325
229	ID36924471	36924471	40	5.240	204.207	36.235	0	2882.382	6	0.500	1	-10921639	361.825	359	324	434	35097	25.386	1.717	0.019	0.543
230	ID37070381	37070381	40	4.764	205.328	35.570	0	3362.779	7	0.500	1	-10921639	346.588	344	299	404	33619	21.875	1.644	0.011	0.358
231	ID37132923	37132923	40	7.328	206.023	35.776	0	3843.176	8	0.500	1	-10921639	331.670	325	278	448	32172	28.649	1.900	0.029	0.660
232	ID36935257	36935257	40	4.633	204.452	35.345	0	4323.573	9	0.500	1	-10921639	311.474	310	261	386	30213	22.593	0.487	0.012	0.328
233	ID37071608	37071608	41	5.503	183.639	139.016	0	0.000	0	0.500	1	-10921639	378.732	377	312	433	36737	23.783	1.410	0.013	0.403
234	ID36904302	36904302	41	4.341	184.114	138.732	0	480.397	1	0.500	1	-10921639	371.629	373	268	441	36048	22.930	1.824	0.014	0.448
235	ID37065248	37065248	41	4.475	184.184	138.598	0	960.794	2	0.500	1	-10921639	367.113	367	244	426	35610	25.366	1.587	0.017	0.483
236	ID37095419	37095419	42	5.079	0.555	178.117	0	0.000	0	0.500	1	-10921639	404.289	405	333	489	39216	28.700	1.838	0.022	0.611
237	ID36910663	36910663	42	4.470	1.143	178.041	0	480.397	1	0.500	1	-10921639	383.629	382	269	450	37212	26.130	1.782	0.003	0.080
238	ID37089718	37089718	42	4.292	1.854	177.421	0	960.794	2	0.500	1	-10921639	374.753	373	322	435	36351	21.291	1.633	0.011	0.386
239	ID37072352	37072352	42	4.743	1.301	175.883	0	1441.191	3	0.500	1	-10921639	377.557	374	319	488	36623	27.861	1.835	0.013	0.353
240	ID37116025	37116025	43	4.197	182.382	199.432	0	0.000	0	0.500	1	-10921639	452.691	452	363	522	43911	30.051	1.616	0.005	0.147
241	ID36913730	36913730	43	5.007	182.408	199.492	0	480.397	1	0.500	1	-10921639	440.546	442	363	505	42733	23.160	1.900	0.008	0.306
242	ID37087927	37087927	43	3.921	182.020	199.719	0	1441.191	3	0.500	1	-10921639	418.216	418	356	466	40567	20.805	1.900	0.010	0.385
243	ID37242491	37242491	43	5.514	181.322	199.123	0	1921.588	4	0.500	1	-10921639	401.485	403	301	489	38944	28.802	0.711	0.014	0.388
244	ID37061989	37061989	44	12.050	157.835	120.534	0	0.000	0	0.500	1	-10921639	506.505	498	433	653	49131	46.634	0.475	0.022	0.463
245	ID36900854	36900854	44	4.178	158.327	121.031	0	480.397	1	0.500	1	-10921639	432.392	438	369	480	41942	22.936	1.900	0.012	0.452
246	ID37099622	37099622	45	4.490	181.881	175.638	0	0.000	0	0.500	1	-10921639	473.464	477	388	566	45926	30.546	1.406	0.009	0.275
247	ID36909487	36909487	45	3.876	182.198	175.525	0	480.397	1	0.500	1	-10921639	450.959	455	335	529	43743	27.428	1.788	0.018	0.581
248	ID37094503	37094503	45	4.052	182.591	173.240	0	960.794	2	0.500	1	-10921639	454.784	456	384	525	44114	24.264	1.606	0.003	0.103
249	ID37071398	37071398	45	5.381	183.085	174.271	0	1441.191	3	0.500	1	-10921639	447.247	450	369	510	43383	28.789	0.716	0.012	0.357
250	ID37233838	37233838	45	4.093	182.935	174.322	0	1921.588	4	0.500	1	-10921639	426.660	428	330	490	41386	27.155	1.900	0.014	0.425
251	ID37065062	37065062	46	4.229	81.183	125.579	0	0.000	0	0.500	1	-10921639	447.495	448	380	499	43407	25.447	1.900	0.013	0.463
252	ID36901277	36901277	46	4.261	81.683	125.212	0	480.397	1	0.500	1	-10921639	427.526	424	381	487	41470	22.147	1.618	0.007	0.251
253	ID37039191	37039191	46	4.036	82.021	124.958	0	1441.191	3	0.500	1	-10921639	418.845	420	362	473	40628	22.317	1.761	0.009	0.342
254	ID37208198	37208198	46	4.210	81.482	124.522	0	1921.588	4	0.500	1	-10921639	409.000	409	337	491	39673	27.253	1.900	0.016	0.485
255	ID37188953	37188953	46	4.189	82.082	124.408	0	2401.985	5	0.500	1	-10921639	410.608	414	311	471	39829	24.854	1.796	0.003	0.086
256	ID36966250	36966250	46	4.191	82.302	125.254	0	2882.382	6	0.500	1	-10921639	390.649	392	316	450	37893	25.219	1.608	0.007	0.227
257	ID37041635	37041635	47	6.685	196.529	99.889	0	0.000	0	0.500	1	-10921639	439.907	437	367	516	42671	31.376	1.900	0.012	0.319
258	ID36897715	36897715	47	7.077	196.340	99.818	0	480.397	1	0.500	1	-10921639	388.082	382	317	499	37644	33.178	1.900	0.024	0.547
259	ID37030073	37030073	47	11.497	197.406	98.634	0	960.794	2	0.500	1	-10921639	413.237	405	321	592	40084	44.937	0.481	0.043	0.751
260	ID37022346	37022346	47	8.891	197.273	99.591	0	1441.191	3	0.500	1	-10921639	400.113	394	329	501	38811	36.249	1.409	0.026	0.557
261	ID37038829	37038829	48	10.936	68.953	95.573	0	0.000	0	0.500	1	-10921639	516.742	507	422	646	50124	46.599	0.710	0.023	0.495
262	ID36896199	36896199	48	11.541	70.098	95.634	0	480.397	1	0.500	1	-10921639	463.062	453	362	605	44917	44.887	0.481	0.029	0.577
263	ID37027437	37027437	48	4.870	70.267	95.660	0	960.794	2	0.500	1	-10921639	429.856	427	353	514	41696	29.624	1.631	0.027	0.751
264	ID37009324	37009324	48	3.942	69.022	94.767	0	1441.191	3	0.500	1	-10921639	431.433	434	347	506	41849	26.050	1.617	0.018	0.573
265	ID37028076	37028076	49	12.242	9.536	81.069	0	0.000	0	0.500	1	-10921639	452.021	444	352	609	43846	45.594	0.488	0.034	0.661
266	ID36894924	36894924	49	4.986	9.896	81.633	0	480.397	1	0.500	1	-10921639	408.186	404	317	502	39594	27.519	0.487	0.010	0.281
267	ID37033580	37033580	50	4.623	56.632	88.005	0	0.000	0	0.500	1	-10921639	474.340	474	390	564	46011	28.340	1.766	0.006	0.212
268	ID36895336	36895336	50	6.936	58.256	86.931	0	480.397	1	0.500	1	-10921639	435.784	435	363	540	42271	30.774	1.819	0.017	0.479
269	ID37067884	37067884	51	5.928	212.566	135.831	0	0.000	0	0.500	1	-10921639	430.309	428	342	497	41740	31.746	1.900	0.016	0.434
270	ID36903016	36903016	51	3.867	212.824	135.711	0	480.397	1	0.500	1	-10921639	382.052	383	314	432	37059	23.180	1.386	0.014	0.444
271	ID37065551	37065551	51	4.688	214.225	138.874	0	960.794	2	0.500	1	-10921639	411.278	410	358	475	39894	23.917	1.803	0.014	0.489
272	ID37048786	37048786	51	6.636	214.804	139.946	0	1441.191	3	0.500	1	-10921639	401.577	398	348	477	38953	27.605	1.900	0.014	0.404
273	ID37220657	37220657	51	9.006	214.861	139.580	0	1921.588	4	0.500	1	-10921639	399.062	393	350	511	38709	34.750	0.480	0.030	0.673
274	ID37197562	37197562	51	5.474	214.496	139.742	0	2401.985	5	0.500	1	-10921639	391.010	387	337	507	37928	27.538	1.796	0.014	0.382
275	ID36975166	36975166	51	10.174	214.617	139.825	0	2882.382	6	0.500	1	-10921639	386.588	375	328	517	37499	37.692	0.486	0.035	0.700
276	ID36978152	36978152	52	5.583	128.680	2.362	0	0.000	0	0.500	1	-10921639	485.742	488	387	575	47117	30.249	1.900	0.014	0.448
277	ID36881063	36881063	52	4.745	128.504	2.238	0	480.397	1	0.500	1	-10921639	434.155	432	357	512	42113	25.335	0.487	0.019	0.636
278	ID36951055	36951055	52	4.339	128.246	2.187	0	960.794	2	0.500	1	-10921639	423.124	422	358	485	41043	24.222	1.619	0.015	0.526
279	ID36940921	36940921	52	4.332	128.235	2.102	0	1441.191	3	0.500	1	-10921639	407.402	408	342	469	39518	21.649	0.719	0.008	0.284
280	ID37139249	37139249	52	8.492	128.269	3.776	0	1921.588	4	0.500	1	-10921639	419.918	417	341	505	40732	33.023	0.484	0.018	0.441
281	ID37082974	37082974	52	13.439	128.283	3.543	0	2401.985	5	0.500	1	-10921639	424.577	413	348	584	41184	47.931	1.834	0.038	0.642
282	ID36916984	36916984	52	8.976	129.301	4.493	0	2882.382	6	0.500	1	-10921639	411.278	404	338	552	39894	35.846	0.473	0.024	0.548
283	ID37048231	37048231	52	11.659	127.977	3.390	0	3362.779	7	0.500	1	-10921639	403.010	395	344	553	39092	44.399	1.821	0.035	0.617
284	ID37107195	37107195	52	8.978	128.597	2.765	0	3843.176	8	0.500	1	-10921639	372.701	366	278	498	36152	33.810	0.489	0.029	0.612
285	ID37124331	37124331	53	7.890	197.356	208.192	0	0.000	0	0.500	1	-10921639	449.557	450	373	506	43607	26.549	1.900	0.019	0.642
286	ID36914808	36914808	53	7.356	198.836	209.172	0	480.397	1	0.500	1	-10921639	407.031	402	355	510	39482	28.860	1.599	0.024	0.671
287	ID37119677	37119677	53	6.019	198.841	209.097	0	960.794	2	0.500	1	-10921639	391.268	388	352	472	37953	23.089	1.609	0.017	0.555
288	ID37092578	37092578	53	6.112	198.566	209.493	0	1441.191	3	0.500	1	-10921639	380.732	379	331	446	36931	23.384	1.587	0.017	0.560
289	ID37243177	37243177	53	4.300	199.057	209.804	0	1921.588	4	0.500	1	-10921639	369.990	368	319	439	35889	20.378	1.596	0.010	0.359
290	ID37224760	37224760	53	4.114	198.854	209.880	0	2401.985	5	0.500	1	-10921639	361.320	359	302	410	35048	19.485	1.789	0.013	0.458
291	ID37095016	37095016	54	3.844	112.393	177.398	0	0.000	0	0.500	1	-10921639	416.227	419	358	473	40374	23.651	1.820	0.010	0.346
292	ID36908718	36908718	54	4.611	113.042	173.727	0	480.397	1	0.500	1	-10921639	394.990	390	334	486	38314	27.849	1.831	0.020	0.551
293	ID37091466	37091466	54	6.545	111.356	176.261	0	960.794	2	0.500	1	-10921639	406.845	404	295	511	39464	32.130	1.900	0.015	0.362
294	ID37072406	37072406	54	5.678	111.436	175.946	0	1441.191	3	0.500	1	-10921639	403.031	396	353	490	39094	26.511	0.492	0.014	0.432
295	ID37234066	37234066	54	6.769	111.617	175.060	0	1921.588	4	0.500	1	-10921639	397.732	396	332	495	38580	29.388	0.481	0.023	0.599
296	ID37097449	37097449	55	4.925	184.883	172.679	0	0.000	0	0.500	1	-10921639	448.515	449	373	518	43506	29.691	1.391	0.011	0.334
297	ID36909267	36909267	55	6.983	185.359	172.354	0	480.397	1	0.500	1	-10921639	425.258	424	348	475	41250	27.178	1.595	0.019	0.575
298	ID37093601	37093601	55	3.773	185.470	172.099	0	960.794	2	0.500	1	-10921639	402.402	402	357	452	39033	19.338	1.602	0.009	0.374
299	ID37073739	37073739	55	4.629	185.874	171.746	0	1441.191	3	0.500	1	-10921639	396.155	394	333	470	38427	24.309	0.704	0.016	0.509
300	ID37234257	37234257	55	3.953	185.248	172.398	0	1921.588	4	0.500	1	-10921639	399.093	398	353	442	38712	17.971	1.404	2.505E-4	0.011
301	ID37097833	37097833	56	8.064	178.781	173.250	0	0.000	0	0.500	1	-10921639	475.320	473	404	584	46106	39.840	1.777	0.022	0.519
302	ID36909377	36909377	56	9.371	179.509	173.088	0	480.397	1	0.500	1	-10921639	462.701	461	386	597	44882	37.858	0.477	0.026	0.616
303	ID37094306	37094306	56	9.027	179.759	173.053	0	960.794	2	0.500	1	-10921639	458.866	456	376	583	44510	37.636	0.489	0.027	0.634
304	ID37070653	37070653	56	11.684	180.036	173.023	0	1441.191	3	0.500	1	-10921639	459.907	449	387	577	44611	40.809	0.484	0.028	0.606
305	ID37234416	37234416	56	11.140	179.492	172.905	0	1921.588	4	0.500	1	-10921639	434.052	424	367	596	42103	44.171	0.482	0.030	0.574
306	ID37212146	37212146	56	10.569	179.768	173.091	0	2401.985	5	0.500	1	-10921639	433.557	426	366	571	42055	37.984	0.486	0.031	0.684
307	ID37002704	37002704	56	8.895	179.558	173.186	0	2882.382	6	0.500	1	-10921639	415.134	411	346	515	40268	35.720	0.478	0.024	0.542
308	ID37164064	37164064	56	9.939	179.983	173.338	0	3362.779	7	0.500	1	-10921639	411.660	407	342	516	39931	33.495	0.483	0.031	0.738
309	ID37221126	37221126	56	9.678	179.924	173.572	0	3843.176	8	0.500	1	-10921639	384.196	380	320	550	37267	35.655	0.488	0.027	0.570
310	ID37019733	37019733	56	10.040	179.811	173.584	0	4323.573	9	0.500	1	-10921639	364.340	356	298	473	35341	35.873	0.483	0.038	0.739
311	ID37009877	37009877	57	5.297	66.010	57.669	0	0.000	0	0.500	1	-10921639	459.320	460	334	512	44554	24.164	1.657	0.010	0.372
312	ID36889945	36889945	57	4.418	65.645	58.619	0	480.397	1	0.500	1	-10921639	402.247	399	340	478	39018	25.313	1.900	0.017	0.537
313	ID36997272	36997272	57	4.321	65.743	58.514	0	960.794	2	0.500	1	-10921639	395.670	394	334	474	38380	24.445	0.701	0.009	0.283
314	ID37177123	37177123	57	5.815	64.194	60.150	0	1921.588	4	0.500	1	-10921639	392.814	390	312	531	38103	30.176	1.679	0.019	0.497
315	ID37138069	37138069	57	7.384	62.991	61.954	0	2401.985	5	0.500	1	-10921639	374.000	367	301	472	36278	33.933	0.471	0.019	0.409
316	ID36933957	36933957	57	7.038	62.651	61.816	0	2882.382	6	0.500	1	-10921639	368.505	364	323	461	35745	29.331	0.487	0.025	0.604
317	ID37098114	37098114	57	6.645	63.244	62.017	0	3362.779	7	0.500	1	-10921639	362.825	357	304	459	35194	27.669	0.480	0.019	0.492
318	ID37050449	37050449	58	4.808	24.264	106.190	0	0.000	0	0.500	1	-10921639	447.732	446	372	531	43430	24.299	1.589	0.009	0.345
319	ID36898635	36898635	58	4.507	24.790	105.859	0	480.397	1	0.500	1	-10921639	416.526	415	348	470	40403	23.132	1.384	0.014	0.498
320	ID37118942	37118942	59	6.961	213.792	206.676	0	0.000	0	0.500	1	-10921639	460.918	458	380	528	44709	30.985	1.794	0.003	0.077
321	ID36915997	36915997	59	4.142	214.342	206.601	0	480.397	1	0.500	1	-10921639	407.258	405	353	481	39504	22.029	1.602	0.010	0.359
322	ID37116592	37116592	59	4.038	214.084	206.637	0	960.794	2	0.500	1	-10921639	391.629	391	339	474	37988	22.160	1.773	0.015	0.517
323	ID37092213	37092213	59	3.811	212.290	208.999	0	1441.191	3	0.500	1	-10921639	378.557	376	316	443	36720	23.286	1.589	0.010	0.323
324	ID37225895	37225895	59	5.950	214.913	206.529	0	2401.985	5	0.500	1	-10921639	368.814	367	306	442	35775	23.578	0.711	0.013	0.398
325	ID37027119	37027119	59	3.921	214.410	206.459	0	2882.382	6	0.500	1	-10921639	356.485	357	272	420	34579	22.916	1.597	0.019	0.570
326	ID37038684	37038684	60	4.315	172.565	94.861	0	0.000	0	0.500	1	-10921639	424.979	423	360	489	41223	26.254	0.704	0.008	0.251
327	ID36895490	36895490	60	3.960	173.762	97.784	0	480.397	1	0.500	1	-10921639	412.505	407	345	483	40013	28.469	1.829	0.013	0.368
328	ID37038812	37038812	61	4.676	179.286	95.169	0	0.000	0	0.500	1	-10921639	486.536	485	351	550	47194	28.673	1.900	0.013	0.437
329	ID36896548	36896548	61	4.019	181.086	92.840	0	480.397	1	0.500	1	-10921639	417.526	415	354	504	40500	22.424	1.626	0.008	0.312
330	ID37025709	37025709	61	4.552	181.541	93.071	0	960.794	2	0.500	1	-10921639	411.948	409	361	474	39959	19.790	1.900	0.010	0.398
331	ID37192712	37192712	61	8.783	179.940	95.195	0	1921.588	4	0.500	1	-10921639	426.216	420	359	564	41343	35.555	0.482	0.023	0.538
332	ID37167262	37167262	61	9.249	180.024	95.444	0	2401.985	5	0.500	1	-10921639	428.443	428	347	552	41559	36.339	1.900	0.024	0.563
333	ID36947080	36947080	61	4.003	180.559	95.237	0	2882.382	6	0.500	1	-10921639	386.505	383	334	458	37491	22.079	1.900	0.010	0.358
334	ID37117422	37117422	61	10.627	180.085	95.230	0	3362.779	7	0.500	1	-10921639	402.773	393	339	501	39069	38.925	1.900	0.034	0.674
335	ID37171918	37171918	61	5.047	178.927	95.476	0	3843.176	8	0.500	1	-10921639	366.701	366	323	428	35570	21.507	0.487	0.013	0.433
336	ID37057247	37057247	62	5.545	156.403	119.648	0	0.000	0	0.500	1	-10921639	469.052	471	357	540	45498	28.835	1.601	0.011	0.342
337	ID36899861	36899861	62	4.046	157.027	119.641	0	480.397	1	0.500	1	-10921639	430.557	432	361	484	41764	25.016	1.593	0.014	0.462
338	ID36980953	36980953	63	4.397	83.517	14.147	0	0.000	0	0.500	1	-10921639	400.175	402	313	460	38817	21.402	0.705	0.015	0.567
339	ID36882311	36882311	63	4.752	80.446	12.861	0	480.397	1	0.500	1	-10921639	405.278	405	347	471	39312	22.766	1.900	0.015	0.522
340	ID36958520	36958520	63	3.905	80.983	12.778	0	960.794	2	0.500	1	-10921639	399.897	399	351	442	38790	21.060	1.596	0.014	0.541
341	ID37143079	37143079	63	4.469	81.678	13.418	0	1921.588	4	0.500	1	-10921639	387.907	391	281	444	37627	24.337	1.850	0.018	0.564
342	ID37088569	37088569	63	3.792	83.726	10.944	0	2401.985	5	0.500	1	-10921639	382.784	382	339	434	37130	18.977	1.780	0.015	0.595
343	ID37067992	37067992	64	5.902	47.761	136.304	0	0.000	0	0.500	1	-10921639	441.072	437	375	515	42784	27.886	0.490	0.022	0.678
344	ID36903137	36903137	64	5.245	48.494	136.158	0	480.397	1	0.500	1	-10921639	409.268	406	356	495	39699	26.690	0.717	0.016	0.489
345	ID37061175	37061175	64	5.537	47.994	136.578	0	960.794	2	0.500	1	-10921639	393.557	391	330	487	38175	29.902	0.478	0.014	0.366
346	ID37043647	37043647	64	5.783	47.868	135.701	0	1441.191	3	0.500	1	-10921639	401.443	401	336	462	38940	24.399	1.900	0.012	0.394
347	ID37216865	37216865	64	6.412	47.691	135.212	0	1921.588	4	0.500	1	-10921639	398.392	396	319	478	38644	27.126	0.490	0.016	0.462
348	ID37114457	37114457	65	13.598	77.352	203.607	0	0.000	0	0.500	1	-10921639	503.670	491	423	672	48856	50.530	0.488	0.031	0.601
349	ID36914618	36914618	65	6.321	78.974	203.324	0	480.397	1	0.500	1	-10921639	418.144	420	349	505	40560	29.431	1.611	0.019	0.539
350	ID37114884	37114884	65	4.617	78.620	202.977	0	960.794	2	0.500	1	-10921639	406.856	404	359	472	39465	22.293	0.715	0.013	0.468
351	ID37090908	37090908	65	7.126	78.149	204.017	0	1441.191	3	0.500	1	-10921639	417.268	412	331	493	40475	29.302	1.816	0.027	0.756
352	ID37241583	37241583	65	4.240	77.479	204.798	0	1921.588	4	0.500	1	-10921639	394.464	393	306	463	38263	22.598	1.677	0.017	0.574
353	ID37223521	37223521	65	4.189	76.813	203.150	0	2401.985	5	0.500	1	-10921639	387.639	386	344	458	37601	20.691	0.708	0.011	0.412
354	ID37110470	37110470	66	3.741	163.722	190.189	0	0.000	0	0.500	1	-10921639	430.742	429	367	486	41782	22.105	1.759	0.006	0.223
355	ID36911911	36911911	66	6.209	164.668	190.126	0	480.397	1	0.500	1	-10921639	401.031	395	321	475	38900	29.726	0.483	0.022	0.571
356	ID37105166	37105166	66	5.457	163.904	189.352	0	960.794	2	0.500	1	-10921639	397.773	394	272	470	38584	28.469	0.709	0.020	0.549
357	ID37079830	37079830	66	10.398	164.793	189.886	0	1441.191	3	0.500	1	-10921639	404.196	398	328	524	39207	37.223	1.900	0.035	0.731
358	ID37239179	37239179	66	7.934	163.883	188.805	0	1921.588	4	0.500	1	-10921639	392.742	393	279	489	38096	33.449	0.707	0.020	0.470
359	ID37220107	37220107	66	6.119	163.307	189.167	0	2401.985	5	0.500	1	-10921639	380.485	374	323	464	36907	26.536	1.795	0.019	0.542
360	ID37032135	37032135	67	8.093	57.741	79.921	0	0.000	0	0.500	1	-10921639	472.196	473	402	549	45803	30.077	0.490	0.021	0.631
361	ID36893611	36893611	67	4.472	59.133	79.541	0	480.397	1	0.500	1	-10921639	431.062	433	304	487	41813	28.436	1.779	0.013	0.397
362	ID37027905	37027905	68	4.875	176.041	80.683	0	0.000	0	0.500	1	-10921639	478.876	476	406	540	46451	26.157	1.808	0.009	0.331
363	ID36894763	36894763	68	4.022	177.369	80.274	0	480.397	1	0.500	1	-10921639	445.299	444	378	503	43194	23.429	1.400	0.008	0.315
364	ID36997233	36997233	68	4.330	178.975	79.456	0	1441.191	3	0.500	1	-10921639	401.598	399	353	484	38955	26.413	1.747	0.009	0.265
365	ID37182102	37182102	68	7.177	180.504	78.186	0	1921.588	4	0.500	1	-10921639	388.186	383	337	468	37654	26.403	1.600	0.018	0.514
366	ID37148071	37148071	68	5.332	181.268	77.334	0	2401.985	5	0.500	1	-10921639	363.722	360	315	417	35281	22.810	1.723	0.019	0.592
367	ID36937031	36937031	68	5.048	180.209	78.238	0	2882.382	6	0.500	1	-10921639	370.371	370	308	430	35926	24.198	1.823	0.018	0.554
368	ID37101518	37101518	69	5.058	102.069	181.297	0	0.000	0	0.500	1	-10921639	428.856	426	344	515	41599	25.856	0.484	0.015	0.499
369	ID36910323	36910323	69	3.876	102.182	180.615	0	480.397	1	0.500	1	-10921639	400.773	400	332	457	38875	22.352	1.787	0.006	0.204
370	ID37098586	37098586	69	4.191	102.135	179.746	0	960.794	2	0.500	1	-10921639	395.258	397	323	455	38340	25.596	1.900	0.014	0.429
371	ID37078391	37078391	69	4.132	102.240	179.778	0	1441.191	3	0.500	1	-10921639	391.443	390	332	486	37970	24.089	1.900	0.013	0.419
372	ID37027534	37027534	70	5.971	60.173	80.415	0	0.000	0	0.500	1	-10921639	464.093	458	388	536	45017	27.367	1.675	0.011	0.373
373	ID36894750	36894750	70	5.504	60.885	80.242	0	480.397	1	0.500	1	-10921639	431.206	431	348	527	41827	30.162	0.713	0.021	0.582
374	ID37019438	37019438	70	4.645	60.958	80.069	0	960.794	2	0.500	1	-10921639	407.247	404	331	501	39503	28.027	0.486	0.013	0.364
375	ID37067086	37067086	71	5.483	48.053	131.876	0	0.000	0	0.500	1	-10921639	450.701	450	369	532	43718	27.619	1.603	0.009	0.280
376	ID36902541	36902541	71	4.660	48.274	131.336	0	480.397	1	0.500	1	-10921639	413.082	413	319	501	40069	27.210	1.900	0.014	0.407
377	ID37060208	37060208	71	3.791	48.647	132.215	0	960.794	2	0.500	1	-10921639	394.722	395	332	457	38288	23.695	1.409	0.015	0.504
378	ID37044951	37044951	71	4.448	48.803	131.331	0	1441.191	3	0.500	1	-10921639	408.021	405	323	477	39578	27.052	1.763	0.007	0.201
379	ID36979145	36979145	72	6.593	104.507	8.637	0	0.000	0	0.500	1	-10921639	447.000	447	323	514	43359	31.903	1.900	0.014	0.392
380	ID36883092	36883092	72	7.450	104.740	8.524	0	480.397	1	0.500	1	-10921639	425.041	426	351	497	41229	33.944	1.623	0.028	0.680
381	ID36952009	36952009	72	6.779	104.582	8.243	0	960.794	2	0.500	1	-10921639	425.330	427	368	503	41257	26.357	0.710	0.019	0.605
382	ID36945245	36945245	72	7.765	104.435	8.199	0	1441.191	3	0.500	1	-10921639	426.773	424	337	514	41397	32.291	1.900	0.023	0.589
383	ID37146260	37146260	72	7.791	104.143	7.839	0	1921.588	4	0.500	1	-10921639	417.485	416	343	495	40496	29.052	0.714	0.025	0.692
384	ID37095607	37095607	72	8.683	104.159	8.144	0	2401.985	5	0.500	1	-10921639	414.691	414	343	536	40225	33.392	0.709	0.027	0.651
385	ID36918288	36918288	72	6.292	103.820	8.188	0	2882.382	6	0.500	1	-10921639	391.763	395	325	450	38001	27.369	0.717	0.010	0.294
386	ID37062937	37062937	72	5.948	104.019	7.719	0	3362.779	7	0.500	1	-10921639	385.990	391	320	454	37441	27.005	0.710	0.018	0.514
387	ID37110156	37110156	72	3.980	103.835	8.130	0	3843.176	8	0.500	1	-10921639	346.454	348	311	388	33606	18.310	1.900	0.018	0.665
388	ID36922859	36922859	72	3.806	103.712	7.893	0	4323.573	9	0.500	1	-10921639	326.268	327	266	377	31648	20.888	1.610	0.004	0.112
389	ID37094344	37094344	73	10.431	104.643	174.983	0	0.000	0	0.500	1	-10921639	460.113	455	375	620	44631	43.879	0.481	0.025	0.519
390	ID36909452	36909452	73	9.763	105.639	175.324	0	480.397	1	0.500	1	-10921639	437.000	428	331	542	42389	39.299	0.484	0.023	0.508
391	ID37091455	37091455	73	7.088	105.541	176.267	0	960.794	2	0.500	1	-10921639	425.515	419	362	519	41275	28.480	1.770	0.017	0.493
392	ID37072770	37072770	73	6.097	105.182	176.573	0	1441.191	3	0.500	1	-10921639	407.557	403	306	479	39533	27.977	1.900	0.018	0.524
393	ID37235313	37235313	73	6.271	105.865	177.107	0	1921.588	4	0.500	1	-10921639	395.464	389	335	496	38360	28.743	1.684	0.018	0.475
394	ID37214075	37214075	73	4.255	106.268	177.113	0	2401.985	5	0.500	1	-10921639	389.948	387	345	445	37825	19.493	1.900	0.013	0.518
395	ID37006919	37006919	73	4.039	106.341	177.492	0	2882.382	6	0.500	1	-10921639	376.196	374	327	429	36491	20.824	1.763	0.011	0.392
396	ID37169362	37169362	73	5.253	106.452	177.980	0	3362.779	7	0.500	1	-10921639	374.412	372	310	440	36318	22.948	0.494	0.014	0.465
397	ID37221809	37221809	73	4.230	106.481	178.043	0	3843.176	8	0.500	1	-10921639	352.577	353	285	402	34200	20.777	1.200	0.008	0.279
398	ID37020837	37020837	73	4.271	105.788	178.093	0	4323.573	9	0.500	1	-10921639	326.938	323	283	405	31713	22.570	0.490	0.017	0.475
399	ID36892950	36892950	74	4.411	177.329	76.664	0	480.397	1	0.500	1	-10921639	411.608	409	317	474	39926	24.530	1.775	0.008	0.282
400	ID37014331	37014331	74	4.629	176.689	75.576	0	960.794	2	0.500	1	-10921639	394.258	395	301	469	38243	27.993	0.495	0.011	0.312
401	ID36916374	36916374	75	4.871	206.190	207.892	0	480.397	1	0.500	1	-10921639	368.082	367	305	444	35704	25.205	1.779	0.017	0.479
402	ID37118895	37118895	75	4.838	206.617	208.012	0	960.794	2	0.500	1	-10921639	364.938	362	309	436	35399	23.134	1.844	0.022	0.674
403	ID37243082	37243082	75	3.808	207.282	209.307	0	1921.588	4	0.500	1	-10921639	357.299	359	308	421	34658	21.428	1.771	0.012	0.401
404	ID37224481	37224481	75	4.143	206.809	208.978	0	2401.985	5	0.500	1	-10921639	358.567	358	325	399	34781	18.723	1.900	0.011	0.414
405	ID37191378	37191378	75	4.992	206.200	208.981	0	3362.779	7	0.500	1	-10921639	344.969	343	298	412	33462	22.368	0.706	0.012	0.380
406	ID37234759	37234759	75	5.104	203.454	207.669	0	3843.176	8	0.500	1	-10921639	331.464	327	281	406	32152	23.391	1.900	0.020	0.560
407	ID36898306	36898306	76	6.002	18.220	108.187	0	480.397	1	0.500	1	-10921639	389.948	383	334	517	37825	31.182	1.900	0.014	0.348
408	ID37031980	37031980	76	7.622	18.302	107.808	0	960.794	2	0.500	1	-10921639	383.464	380	324	514	37196	34.082	0.485	0.017	0.384
409	ID37021279	37021279	76	7.590	19.035	107.710	0	1441.191	3	0.500	1	-10921639	374.670	366	329	507	36343	35.059	0.329	0.022	0.458
410	ID37201987	37201987	76	3.778	19.869	108.817	0	1921.588	4	0.500	1	-10921639	365.557	365	299	445	35459	23.723	0.312	0.012	0.371
411	ID36902542	36902542	77	3.893	49.328	131.331	0	480.397	1	0.500	1	-10921639	408.402	409	348	456	39615	21.624	1.900	0.012	0.445
412	ID37055626	37055626	77	6.391	48.712	129.983	0	960.794	2	0.500	1	-10921639	395.485	390	339	474	38362	28.496	0.483	0.025	0.678
413	ID37018685	37018685	78	6.754	55.606	82.354	0	960.794	2	0.500	1	-10921639	402.825	397	351	505	39074	28.863	0.483	0.020	0.548
414	ID36994983	36994983	78	9.027	56.427	81.632	0	1441.191	3	0.500	1	-10921639	407.103	400	336	548	39489	37.252	0.482	0.029	0.626
415	ID37186970	37186970	78	4.482	56.177	81.546	0	1921.588	4	0.500	1	-10921639	386.505	383	315	453	37491	26.383	0.706	0.018	0.524
416	ID37156154	37156154	78	4.504	55.376	81.362	0	2401.985	5	0.500	1	-10921639	391.897	392	308	457	38014	27.571	1.663	0.010	0.286
417	ID36939504	36939504	78	5.171	55.306	81.332	0	2882.382	6	0.500	1	-10921639	382.351	383	276	453	37088	30.941	0.491	0.009	0.225
418	ID37103984	37103984	78	6.368	58.572	80.091	0	3362.779	7	0.500	1	-10921639	382.216	379	297	492	37075	31.431	1.581	0.019	0.442
419	ID37156951	37156951	78	9.526	58.997	79.321	0	3843.176	8	0.500	1	-10921639	362.680	355	267	511	35180	39.669	0.482	0.031	0.557
420	ID36950429	36950429	78	7.502	57.784	79.757	0	4323.573	9	0.500	1	-10921639	344.938	340	278	440	33459	28.462	1.825	0.017	0.414
421	ID37055398	37055398	79	4.348	39.598	150.834	0	1441.191	3	0.500	1	-10921639	380.052	377	333	454	36865	22.915	1.900	0.014	0.454
422	ID37228618	37228618	79	5.166	39.562	150.736	0	1921.588	4	0.500	1	-10921639	369.423	370	290	440	35834	26.261	1.900	0.013	0.351
423	ID37206418	37206418	79	7.045	38.981	151.321	0	2401.985	5	0.500	1	-10921639	383.856	380	312	468	37234	29.897	0.486	0.023	0.576
424	ID36958764	36958764	80	4.100	69.758	37.371	0	1441.191	3	0.500	1	-10921639	397.732	402	349	467	38580	23.500	0.498	0.023	0.761
425	ID37162888	37162888	80	8.040	70.018	37.491	0	1921.588	4	0.500	1	-10921639	413.495	412	362	499	40109	29.321	0.489	0.023	0.628
426	ID37121393	37121393	80	7.345	69.703	37.268	0	2401.985	5	0.500	1	-10921639	399.588	394	332	483	38760	29.676	1.900	0.021	0.543
427	ID36924787	36924787	80	8.377	69.396	37.477	0	2882.382	6	0.500	1	-10921639	395.031	389	346	490	38318	29.768	0.706	0.024	0.632
428	ID37073682	37073682	80	5.796	70.056	37.364	0	3362.779	7	0.500	1	-10921639	378.773	375	325	442	36741	23.676	0.494	0.009	0.282
429	ID37134535	37134535	80	5.061	69.205	37.464	0	3843.176	8	0.500	1	-10921639	351.670	350	299	434	34112	24.580	1.900	0.017	0.475
430	ID36930724	36930724	80	3.898	68.997	37.543	0	4323.573	9	0.500	1	-10921639	324.268	322	246	400	31454	23.072	1.582	0.015	0.408
431	ID37028375	37028375	81	7.643	52.601	112.514	0	1441.191	3	0.500	1	-10921639	425.268	422	347	549	41251	37.496	0.481	0.022	0.482
432	ID37199737	37199737	81	9.499	52.110	112.660	0	1921.588	4	0.500	1	-10921639	428.588	423	324	543	41573	35.601	1.900	0.024	0.556
433	ID37177238	37177238	81	9.275	51.629	112.881	0	2401.985	5	0.500	1	-10921639	416.454	410	340	519	40396	35.870	0.483	0.031	0.688
434	ID36954383	36954383	81	9.249	51.686	113.052	0	2882.382	6	0.500	1	-10921639	408.701	407	311	510	39644	36.357	1.900	0.030	0.655
435	ID37128755	37128755	81	6.010	52.483	113.614	0	3362.779	7	0.500	1	-10921639	373.505	371	306	484	36230	30.754	1.700	0.014	0.333
436	ID37180567	37180567	81	4.634	52.494	113.514	0	3843.176	8	0.500	1	-10921639	358.670	357	298	436	34791	24.020	1.827	0.012	0.345
437	ID37004095	37004095	82	6.360	117.036	65.735	0	960.794	2	0.500	1	-10921639	401.289	401	303	494	38925	33.025	1.813	0.022	0.520
438	ID36987930	36987930	82	7.247	117.049	66.436	0	1441.191	3	0.500	1	-10921639	405.577	401	332	530	39341	33.396	0.485	0.020	0.487
439	ID37177473	37177473	82	7.900	117.138	65.774	0	1921.588	4	0.500	1	-10921639	397.031	390	325	489	38512	32.695	1.900	0.025	0.598
440	ID37144064	37144064	82	7.078	117.041	66.423	0	2401.985	5	0.500	1	-10921639	397.340	392	329	521	38542	32.102	1.900	0.020	0.483
441	ID36935422	36935422	82	5.685	117.319	68.140	0	2882.382	6	0.500	1	-10921639	381.165	378	284	465	36973	30.246	0.488	0.013	0.315
442	ID37102651	37102651	82	4.349	117.877	68.549	0	3362.779	7	0.500	1	-10921639	364.505	361	293	432	35357	24.476	1.391	0.012	0.346
443	ID36992539	36992539	83	4.232	116.775	71.070	0	1441.191	3	0.500	1	-10921639	394.856	394	351	476	38301	22.494	1.781	0.015	0.522
444	ID37179978	37179978	83	7.051	117.343	71.492	0	1921.588	4	0.500	1	-10921639	389.515	384	321	481	37783	30.159	0.488	0.021	0.543
445	ID37143866	37143866	83	7.678	117.337	70.702	0	2401.985	5	0.500	1	-10921639	395.309	392	329	520	38345	32.670	1.900	0.025	0.587
446	ID36937379	36937379	83	4.686	117.313	70.253	0	2882.382	6	0.500	1	-10921639	374.247	371	322	454	36302	25.531	1.900	0.008	0.246
447	ID37100770	37100770	83	7.084	117.595	71.018	0	3362.779	7	0.500	1	-10921639	374.000	366	323	455	36278	29.818	0.480	0.028	0.685
448	ID37151766	37151766	83	4.693	117.497	70.794	0	3843.176	8	0.500	1	-10921639	349.299	345	281	433	33882	27.352	1.612	0.021	0.520
449	ID36969901	36969901	84	4.806	159.767	25.825	0	960.794	2	0.500	1	-10921639	383.629	384	305	461	37212	26.808	1.770	0.021	0.582
450	ID36951951	36951951	84	5.384	159.813	25.962	0	1441.191	3	0.500	1	-10921639	382.959	380	325	459	37147	23.838	1.185	0.008	0.265
451	ID37150070	37150070	84	6.539	160.195	26.417	0	1921.588	4	0.500	1	-10921639	385.423	384	287	481	37386	31.906	0.492	0.023	0.551
452	ID37109700	37109700	84	7.222	160.018	26.476	0	2401.985	5	0.500	1	-10921639	381.134	377	298	469	36970	31.522	0.708	0.019	0.447
453	ID36923059	36923059	84	6.085	160.209	26.863	0	2882.382	6	0.500	1	-10921639	372.237	370	309	443	36107	26.747	0.490	0.020	0.548
454	ID36982896	36982896	85	5.129	73.756	40.153	0	960.794	2	0.500	1	-10921639	409.433	406	372	482	39715	22.842	1.900	0.013	0.465
455	ID36961804	36961804	85	7.001	73.158	40.138	0	1441.191	3	0.500	1	-10921639	400.753	398	304	484	38873	31.868	0.699	0.017	0.432
456	ID37160261	37160261	85	6.994	72.311	40.790	0	1921.588	4	0.500	1	-10921639	385.021	382	314	509	37347	31.320	0.487	0.026	0.620
457	ID37125680	37125680	85	6.312	73.751	39.271	0	2401.985	5	0.500	1	-10921639	383.814	381	331	505	37230	30.012	1.765	0.016	0.415
458	ID36958947	36958947	86	4.912	84.488	13.427	0	960.794	2	0.500	1	-10921639	377.392	375	329	443	36607	22.735	1.829	0.013	0.437
459	ID36943732	36943732	86	4.793	85.342	13.434	0	1441.191	3	0.500	1	-10921639	374.031	373	321	444	36281	22.008	0.705	0.017	0.584
460	ID37142832	37142832	86	4.472	85.529	13.048	0	1921.588	4	0.500	1	-10921639	381.753	380	330	429	37030	20.132	1.597	0.015	0.571
461	ID37086339	37086339	86	4.173	87.480	13.036	0	2401.985	5	0.500	1	-10921639	376.959	375	308	439	36565	19.701	1.900	0.013	0.500
462	ID36920768	36920768	86	3.734	87.185	12.601	0	2882.382	6	0.500	1	-10921639	366.629	370	315	415	35563	19.629	0.714	0.011	0.420
463	ID37056131	37056131	86	4.153	87.400	12.502	0	3362.779	7	0.500	1	-10921639	346.660	349	295	407	33626	22.444	1.582	0.015	0.469
464	ID37059053	37059053	87	3.928	38.365	154.550	0	1441.191	3	0.500	1	-10921639	380.629	379	337	433	36921	19.974	1.900	0.006	0.246
465	ID37226913	37226913	87	5.436	37.893	156.150	0	1921.588	4	0.500	1	-10921639	369.814	367	285	461	35872	27.285	1.900	0.020	0.535
466	ID37207460	37207460	87	4.866	37.704	156.315	0	2401.985	5	0.500	1	-10921639	364.928	362	311	428	35398	23.215	1.900	0.015	0.474
467	ID36988876	36988876	87	4.948	37.185	155.822	0	2882.382	6	0.500	1	-10921639	355.784	353	254	425	34511	24.805	0.493	0.019	0.534
468	ID37160100	37160100	87	3.906	37.746	155.482	0	3362.779	7	0.500	1	-10921639	348.753	345	252	405	33829	22.866	1.396	0.015	0.455
469	ID37083171	37083171	88	3.760	10.475	164.631	0	960.794	2	0.500	1	-10921639	374.165	372	305	434	36294	23.895	1.676	0.007	0.212
470	ID37062635	37062635	88	5.990	9.577	164.193	0	1441.191	3	0.500	1	-10921639	390.557	389	320	474	37884	28.749	0.721	0.015	0.396
471	ID37231544	37231544	88	8.836	8.466	163.886	0	1921.588	4	0.500	1	-10921639	373.505	367	316	522	36230	36.426	1.900	0.029	0.569
472	ID37211116	37211116	88	6.256	9.878	163.716	0	2401.985	5	0.500	1	-10921639	374.938	373	321	473	36369	26.386	1.753	0.018	0.492
473	ID36993273	36993273	88	6.163	9.748	164.397	0	2882.382	6	0.500	1	-10921639	371.289	368	303	460	36015	27.233	1.611	0.013	0.358
474	ID37160740	37160740	88	6.352	9.816	164.546	0	3362.779	7	0.500	1	-10921639	364.340	363	294	438	35341	27.131	1.596	0.019	0.489
475	ID37216934	37216934	88	4.802	9.844	164.789	0	3843.176	8	0.500	1	-10921639	333.361	328	268	427	32336	24.712	1.801	0.011	0.301
476	ID37126829	37126829	89	4.067	74.124	218.277	0	960.794	2	0.500	1	-10921639	399.619	397	354	474	38763	22.837	1.790	0.015	0.515
477	ID37102056	37102056	89	7.010	73.331	217.198	0	1441.191	3	0.500	1	-10921639	400.773	393	318	512	38875	31.791	1.392	0.018	0.437
478	ID37244976	37244976	89	5.302	73.879	217.357	0	1921.588	4	0.500	1	-10921639	398.361	395	345	465	38641	25.316	1.692	0.010	0.312
479	ID37043946	37043946	90	4.357	199.558	136.553	0	1441.191	3	0.500	1	-10921639	394.557	391	322	474	38272	26.995	1.900	0.013	0.369
480	ID37216616	37216616	90	6.814	198.244	134.590	0	1921.588	4	0.500	1	-10921639	379.464	375	300	492	36808	30.959	1.900	0.023	0.558
481	ID37195171	37195171	90	6.898	197.545	133.532	0	2401.985	5	0.500	1	-10921639	361.515	355	306	509	35067	36.152	0.484	0.026	0.501
482	ID36971163	36971163	90	7.271	197.660	133.820	0	2882.382	6	0.500	1	-10921639	356.763	352	272	495	34606	37.076	1.615	0.031	0.575
483	ID37142535	37142535	90	7.585	198.160	136.793	0	3362.779	7	0.500	1	-10921639	383.103	378	312	517	37161	32.352	1.783	0.021	0.484
484	ID37197182	37197182	90	7.474	198.998	137.208	0	3843.176	8	0.500	1	-10921639	361.845	355	278	449	35099	29.713	1.764	0.024	0.562
485	ID36986976	36986976	90	6.120	197.662	138.077	0	4323.573	9	0.500	1	-10921639	346.289	341	294	443	33590	28.710	0.480	0.014	0.343
486	ID37029201	37029201	91	6.660	2.525	115.262	0	1441.191	3	0.500	1	-10921639	398.794	401	335	474	38683	28.558	0.721	0.022	0.588
487	ID37205201	37205201	91	4.296	1.453	114.924	0	1921.588	4	0.500	1	-10921639	375.557	377	306	428	36429	21.976	1.821	0.012	0.399
488	ID36969297	36969297	92	4.841	174.645	47.390	0	1441.191	3	0.500	1	-10921639	423.113	422	371	505	41042	23.812	1.394	0.012	0.422
489	ID37164905	37164905	92	4.128	174.774	47.542	0	1921.588	4	0.500	1	-10921639	410.072	406	354	488	39777	23.819	1.601	0.008	0.256
490	ID37132839	37132839	92	4.113	172.362	48.092	0	2401.985	5	0.500	1	-10921639	375.052	375	318	427	36380	22.007	1.900	0.014	0.458
491	ID36929958	36929958	92	3.730	174.014	47.582	0	2882.382	6	0.500	1	-10921639	394.959	396	292	447	38311	24.944	1.619	0.014	0.432
492	ID37081300	37081300	92	4.254	174.053	47.709	0	3362.779	7	0.500	1	-10921639	390.588	389	325	439	37887	20.750	1.602	0.010	0.381
493	ID37064474	37064474	93	4.080	108.987	137.274	0	960.794	2	0.500	1	-10921639	437.588	440	330	498	42446	25.691	0.488	0.007	0.238
494	ID37044189	37044189	93	4.149	109.815	136.837	0	1441.191	3	0.500	1	-10921639	436.866	435	381	503	42376	22.903	1.795	0.005	0.200
495	ID37215015	37215015	93	3.784	109.560	136.808	0	1921.588	4	0.500	1	-10921639	426.722	426	360	489	41392	24.544	1.788	0.006	0.219
496	ID37198646	37198646	93	3.870	109.662	136.952	0	2401.985	5	0.500	1	-10921639	418.515	416	332	488	40596	26.708	1.779	0.014	0.447
497	ID36973829	36973829	93	3.802	109.809	138.701	0	2882.382	6	0.500	1	-10921639	396.361	397	345	444	38447	19.251	1.795	0.007	0.299
498	ID36962103	36962103	94	8.829	17.835	21.175	0	960.794	2	0.500	1	-10921639	394.041	388	335	506	38222	34.415	0.707	0.027	0.600
499	ID36948703	36948703	94	9.315	17.802	21.046	0	1441.191	3	0.500	1	-10921639	394.155	389	326	505	38233	35.363	0.480	0.030	0.648
500	ID37148171	37148171	94	8.645	16.436	20.436	0	1921.588	4	0.500	1	-10921639	376.093	371	290	492	36481	36.969	0.487	0.034	0.673
501	ID37105535	37105535	94	6.844	16.525	20.910	0	2401.985	5	0.500	1	-10921639	376.567	375	275	460	36527	31.927	1.799	0.025	0.567
502	ID36921815	36921815	94	4.617	17.151	20.817	0	2882.382	6	0.500	1	-10921639	356.948	357	283	424	34624	22.779	1.213	0.013	0.396
503	ID37088204	37088204	95	5.441	183.676	200.167	0	1441.191	3	0.500	1	-10921639	413.505	412	326	492	40110	27.348	1.683	0.014	0.409
504	ID37242599	37242599	95	8.156	182.978	199.743	0	1921.588	4	0.500	1	-10921639	422.371	419	349	536	40970	32.001	1.820	0.017	0.452
505	ID37222110	37222110	95	4.824	182.272	199.196	0	2401.985	5	0.500	1	-10921639	405.278	404	337	471	39312	24.709	1.900	0.014	0.456
506	ID37023447	37023447	95	6.013	182.516	199.854	0	2882.382	6	0.500	1	-10921639	394.258	395	321	488	38243	27.913	1.900	0.016	0.449
507	ID37181464	37181464	95	7.583	182.177	200.101	0	3362.779	7	0.500	1	-10921639	383.072	376	324	484	37158	31.083	1.900	0.027	0.649
508	ID37230829	37230829	95	5.323	181.268	200.277	0	3843.176	8	0.500	1	-10921639	344.845	339	287	422	33450	26.500	0.486	0.018	0.456
509	ID37040767	37040767	95	3.986	181.658	201.107	0	4323.573	9	0.500	1	-10921639	327.722	324	290	389	31789	19.462	1.465	0.018	0.593
510	ID37214519	37214519	96	4.366	218.862	136.035	0	1921.588	4	0.500	1	-10921639	366.041	365	321	458	35506	23.750	1.627	0.014	0.433
511	ID37198558	37198558	96	8.867	219.060	136.690	0	2401.985	5	0.500	1	-10921639	371.969	368	295	514	36081	38.039	0.477	0.030	0.578
512	ID36971941	36971941	96	6.406	217.571	136.138	0	2882.382	6	0.500	1	-10921639	367.082	364	313	478	35607	29.216	1.900	0.021	0.524
513	ID37142548	37142548	96	6.692	217.688	136.801	0	3362.779	7	0.500	1	-10921639	359.557	354	303	468	34877	30.615	1.793	0.025	0.562
514	ID37214515	37214515	97	6.871	214.082	136.107	0	1921.588	4	0.500	1	-10921639	389.227	386	240	484	37755	33.833	1.900	0.032	0.716
515	ID37193091	37193091	97	9.399	212.697	135.261	0	2401.985	5	0.500	1	-10921639	377.485	370	252	489	36616	39.095	0.478	0.025	0.480
516	ID36969261	36969261	97	7.078	214.434	135.094	0	2882.382	6	0.500	1	-10921639	371.402	371	298	496	36026	27.329	0.473	0.019	0.509
517	ID37146574	37146574	97	5.034	214.354	135.317	0	3362.779	7	0.500	1	-10921639	356.062	352	310	424	34538	23.142	1.622	0.019	0.571
518	ID37154337	37154337	98	7.858	163.303	30.371	0	1921.588	4	0.500	1	-10921639	376.722	374	268	496	36542	39.659	0.487	0.021	0.392
519	ID37112780	37112780	98	6.812	163.243	31.084	0	2401.985	5	0.500	1	-10921639	368.175	366	268	446	35713	30.533	0.481	0.021	0.502
520	ID36926724	36926724	98	4.202	163.400	31.542	0	2882.382	6	0.500	1	-10921639	352.969	351	279	429	34238	23.847	1.793	0.012	0.361
521	ID37077769	37077769	98	4.679	163.221	30.150	0	3362.779	7	0.500	1	-10921639	353.402	350	288	422	34280	23.417	0.490	0.017	0.516
522	ID37126047	37126047	98	4.673	163.841	29.887	0	3843.176	8	0.500	1	-10921639	342.536	340	249	434	33226	25.562	1.685	0.016	0.426
523	ID37170857	37170857	99	7.688	67.297	56.860	0	1921.588	4	0.500	1	-10921639	399.289	397	339	492	38731	29.511	1.803	0.024	0.628
524	ID37131144	37131144	99	14.451	67.030	56.434	0	2401.985	5	0.500	1	-10921639	412.268	395	287	582	39990	52.421	0.484	0.039	0.593
525	ID36932325	36932325	99	10.315	66.501	55.828	0	2882.382	6	0.500	1	-10921639	381.598	376	315	496	37015	38.733	0.484	0.033	0.630
526	ID37087546	37087546	99	10.595	66.937	56.893	0	3362.779	7	0.500	1	-10921639	382.948	370	296	526	37146	42.764	1.900	0.036	0.622
527	ID37143555	37143555	99	6.297	66.690	56.385	0	3843.176	8	0.500	1	-10921639	357.660	353	296	436	34693	26.911	1.900	0.019	0.508
528	ID36939325	36939325	99	7.053	65.927	58.040	0	4323.573	9	0.500	1	-10921639	341.701	335	298	458	33145	28.223	1.900	0.025	0.589
529	ID37201448	37201448	100	10.941	208.354	107.685	0	1921.588	4	0.500	1	-10921639	406.691	395	345	525	39449	41.434	0.483	0.025	0.486
530	ID37179955	37179955	100	11.426	207.807	108.584	0	2401.985	5	0.500	1	-10921639	393.309	387	327	519	38151	40.284	0.483	0.035	0.658
531	ID36956815	36956815	100	11.461	208.228	109.210	0	2882.382	6	0.500	1	-10921639	383.165	373	301	517	37167	42.309	0.475	0.033	0.580
532	ID37129566	37129566	100	9.737	207.763	108.074	0	3362.779	7	0.500	1	-10921639	371.897	367	278	465	36074	37.688	1.900	0.034	0.641
533	ID37181991	37181991	100	7.158	207.881	107.706	0	3843.176	8	0.500	1	-10921639	341.567	338	258	471	33132	34.888	0.477	0.015	0.293
534	ID37156237	37156237	101	4.073	55.209	34.924	0	1921.588	4	0.500	1	-10921639	384.237	383	326	441	37271	21.196	0.709	0.010	0.353
535	ID37117594	37117594	101	3.816	55.457	34.623	0	2401.985	5	0.500	1	-10921639	370.309	372	291	431	35920	22.762	0.721	0.019	0.621
536	ID37139337	37139337	102	5.625	139.706	4.213	0	1921.588	4	0.500	1	-10921639	392.567	391	293	473	38079	27.721	0.493	0.019	0.529
537	ID37083443	37083443	102	4.515	139.633	4.355	0	2401.985	5	0.500	1	-10921639	384.814	381	325	441	37327	23.838	0.710	0.019	0.597
538	ID36916883	36916883	102	4.634	139.546	4.064	0	2882.382	6	0.500	1	-10921639	378.536	376	326	436	36718	24.273	1.613	0.015	0.469
539	ID37048753	37048753	102	3.954	139.786	4.337	0	3362.779	7	0.500	1	-10921639	365.000	362	320	417	35405	20.887	0.724	0.014	0.494
540	ID37233274	37233274	103	8.622	48.973	169.269	0	1921.588	4	0.500	1	-10921639	390.505	383	312	526	37879	37.160	0.483	0.025	0.518
541	ID37211550	37211550	103	9.833	47.232	169.750	0	2401.985	5	0.500	1	-10921639	377.907	367	310	513	36657	38.703	0.474	0.029	0.555
542	ID37001096	37001096	103	8.730	47.410	169.648	0	2882.382	6	0.500	1	-10921639	371.969	365	298	503	36081	36.676	0.470	0.023	0.466
543	ID37165442	37165442	103	8.945	47.981	169.617	0	3362.779	7	0.500	1	-10921639	367.371	358	310	489	35635	35.955	1.900	0.027	0.538
544	ID37239422	37239422	104	3.772	219.651	183.223	0	1921.588	4	0.500	1	-10921639	394.856	395	312	462	38301	24.093	1.788	0.007	0.227
545	ID37217444	37217444	104	4.001	221.758	183.192	0	2401.985	5	0.500	1	-10921639	344.392	362	123	439	33406	63.179	1.787	0.054	0.559
546	ID37234269	37234269	105	4.863	103.319	172.498	0	1921.588	4	0.500	1	-10921639	416.124	418	339	478	40364	26.177	1.425	0.017	0.545
547	ID37211875	37211875	105	6.982	103.268	172.317	0	2401.985	5	0.500	1	-10921639	414.773	415	354	507	40233	27.725	0.495	0.025	0.720
548	ID37002167	37002167	105	4.836	102.787	172.541	0	2882.382	6	0.500	1	-10921639	398.134	397	348	452	38619	21.854	1.786	0.014	0.498
549	ID37002493	37002493	105	4.347	102.892	172.971	0	2882.382	6	0.500	1	-10921639	394.289	395	343	438	38246	22.649	1.829	0.016	0.535
550	ID37163843	37163843	105	5.087	103.244	172.984	0	3362.779	7	0.500	1	-10921639	379.959	378	336	444	36856	23.664	1.777	0.022	0.679
551	ID37220339	37220339	105	6.193	102.660	172.192	0	3843.176	8	0.500	1	-10921639	360.784	355	286	457	34996	28.227	0.478	0.019	0.488
552	ID37221018	37221018	105	4.997	102.984	173.465	0	3843.176	8	0.500	1	-10921639	351.753	349	314	438	34120	22.872	0.730	0.015	0.448
553	ID37022050	37022050	105	7.345	102.164	171.624	0	4323.573	9	0.500	1	-10921639	332.144	326	264	430	32218	32.327	1.900	0.034	0.683
554	ID37026675	37026675	105	6.633	103.355	175.609	0	4323.573	9	0.500	1	-10921639	338.928	331	279	464	32876	28.013	0.480	0.021	0.490
555	ID37195231	37195231	106	4.312	55.828	91.893	0	1921.588	4	0.500	1	-10921639	396.361	398	346	479	38447	23.181	1.640	0.014	0.487
556	ID37161497	37161497	106	3.968	57.602	91.325	0	2401.985	5	0.500	1	-10921639	387.897	390	303	468	37626	25.351	0.707	0.020	0.595
557	ID37243089	37243089	107	5.882	78.979	209.392	0	1921.588	4	0.500	1	-10921639	380.856	379	321	454	36943	27.117	1.900	0.018	0.489
558	ID37224456	37224456	107	7.464	78.968	209.007	0	2401.985	5	0.500	1	-10921639	380.505	374	311	485	36909	32.120	1.598	0.027	0.632
559	ID37029397	37029397	107	5.335	78.208	208.287	0	2882.382	6	0.500	1	-10921639	369.330	369	295	437	35825	25.197	1.793	0.026	0.740
560	ID37236178	37236178	108	4.004	13.236	166.823	0	1921.588	4	0.500	1	-10921639	350.557	346	281	454	34004	26.727	0.464	0.013	0.334
561	ID37212783	37212783	108	4.726	13.246	166.680	0	2401.985	5	0.500	1	-10921639	350.010	349	274	458	33951	26.737	1.794	0.016	0.408
562	ID36991707	36991707	108	4.436	12.864	167.412	0	2882.382	6	0.500	1	-10921639	345.619	344	300	416	33525	22.645	1.900	0.015	0.464
563	ID37183552	37183552	109	5.744	177.130	80.957	0	1921.588	4	0.500	1	-10921639	383.237	380	301	475	37174	29.723	1.900	0.014	0.360
564	ID37156537	37156537	109	6.380	176.808	81.767	0	2401.985	5	0.500	1	-10921639	366.474	362	300	445	35548	28.865	0.486	0.018	0.456
565	ID36939523	36939523	109	3.733	177.755	81.343	0	2882.382	6	0.500	1	-10921639	364.330	364	309	408	35340	19.816	1.578	0.016	0.563
566	ID37234247	37234247	110	6.111	51.823	172.322	0	1921.588	4	0.500	1	-10921639	370.907	365	287	472	35978	30.698	1.900	0.018	0.433
567	ID37211951	37211951	110	7.176	52.811	172.602	0	2401.985	5	0.500	1	-10921639	358.526	349	305	518	34777	35.785	1.900	0.023	0.457
568	ID37002160	37002160	110	4.618	52.749	172.603	0	2882.382	6	0.500	1	-10921639	347.753	345	297	440	33732	25.226	1.900	0.015	0.409
569	ID37168459	37168459	110	5.005	51.582	171.725	0	3362.779	7	0.500	1	-10921639	352.216	353	286	428	34165	24.692	0.487	0.018	0.493
570	ID37111018	37111018	111	3.800	135.837	29.430	0	2401.985	5	0.500	1	-10921639	386.505	386	297	455	37491	23.301	0.704	0.006	0.196
571	ID36924978	36924978	111	8.513	138.003	30.407	0	2882.382	6	0.500	1	-10921639	382.515	378	271	481	37104	35.804	0.486	0.028	0.592
572	ID37078425	37078425	111	7.457	138.464	31.186	0	3362.779	7	0.500	1	-10921639	369.381	361	285	487	35830	33.368	0.713	0.023	0.490
573	ID37130127	37130127	111	7.503	138.509	31.731	0	3843.176	8	0.500	1	-10921639	346.959	342	215	446	33655	33.578	0.483	0.030	0.603
574	ID36929701	36929701	111	3.778	138.104	30.898	0	4323.573	9	0.500	1	-10921639	321.216	318	202	395	31158	24.532	1.391	0.014	0.366
575	ID36939454	36939454	112	4.274	61.194	81.093	0	2882.382	6	0.500	1	-10921639	370.021	369	315	486	35892	29.219	0.479	0.007	0.184
576	ID37110434	37110434	112	7.804	62.319	81.738	0	3362.779	7	0.500	1	-10921639	365.258	355	302	498	35430	35.067	1.589	0.028	0.561
577	ID37162175	37162175	112	3.842	63.441	82.148	0	3843.176	8	0.500	1	-10921639	335.835	335	294	391	32576	20.195	1.403	0.017	0.551
578	ID36951575	36951575	112	8.740	63.169	81.985	0	4323.573	9	0.500	1	-10921639	331.515	321	279	482	32157	38.452	0.319	0.029	0.494
579	ID36980845	36980845	113	6.089	87.502	140.643	0	2882.382	6	0.500	1	-10921639	402.722	398	342	493	39064	29.316	1.802	0.016	0.442
580	ID37154466	37154466	113	8.820	85.991	139.525	0	3362.779	7	0.500	1	-10921639	383.639	379	293	546	37213	39.028	0.476	0.028	0.537
581	ID37197862	37197862	113	9.519	85.585	140.380	0	3843.176	8	0.500	1	-10921639	369.062	363	239	522	35799	40.101	0.487	0.037	0.660
582	ID36993952	36993952	113	7.659	85.932	140.879	0	4323.573	9	0.500	1	-10921639	350.196	343	284	494	33969	34.923	1.782	0.022	0.437
583	ID36975918	36975918	114	4.345	91.521	142.092	0	2882.382	6	0.500	1	-10921639	392.392	393	316	478	38062	26.132	1.699	0.010	0.309
584	ID37147359	37147359	114	9.905	91.410	142.140	0	3362.779	7	0.500	1	-10921639	401.340	392	341	548	38930	42.227	0.473	0.029	0.537
585	ID37201085	37201085	114	7.420	91.904	141.921	0	3843.176	8	0.500	1	-10921639	364.340	359	293	464	35341	34.688	0.483	0.026	0.541
586	ID37206742	37206742	115	3.914	176.170	152.622	0	2401.985	5	0.500	1	-10921639	378.474	381	320	436	36712	21.462	1.900	0.013	0.436
587	ID36982447	36982447	115	9.033	179.284	152.510	0	2882.382	6	0.500	1	-10921639	375.619	367	299	530	36435	39.787	0.348	0.024	0.442
588	ID37152547	37152547	115	9.792	180.316	152.632	0	3362.779	7	0.500	1	-10921639	364.062	360	280	490	35314	39.153	0.487	0.034	0.620
589	ID37209014	37209014	115	6.144	179.015	152.920	0	3843.176	8	0.500	1	-10921639	341.680	337	235	457	33143	31.912	0.483	0.023	0.473
590	ID37002594	37002594	115	7.070	178.479	153.038	0	4323.573	9	0.500	1	-10921639	332.639	330	266	432	32266	28.430	1.837	0.022	0.515
591	ID37125270	37125270	116	5.837	57.449	39.062	0	2401.985	5	0.500	1	-10921639	423.948	425	337	499	41123	23.661	1.792	0.014	0.481
592	ID36928599	36928599	116	5.671	57.331	39.790	0	2882.382	6	0.500	1	-10921639	407.289	407	321	487	39507	25.975	1.827	0.019	0.590
593	ID37076618	37076618	116	4.887	57.636	39.768	0	3362.779	7	0.500	1	-10921639	387.175	385	333	466	37556	22.808	1.900	0.016	0.534
594	ID37135689	37135689	116	5.345	57.640	40.088	0	3843.176	8	0.500	1	-10921639	370.742	370	306	438	35962	26.110	0.487	0.017	0.469
595	ID36936290	36936290	116	7.279	56.443	39.652	0	4323.573	9	0.500	1	-10921639	345.103	340	291	450	33475	28.629	1.786	0.023	0.531
596	ID36964826	36964826	117	4.695	162.449	120.405	0	2882.382	6	0.500	1	-10921639	393.371	391	323	466	38157	25.058	1.900	0.014	0.435
597	ID37136231	37136231	117	3.796	158.681	120.711	0	3362.779	7	0.500	1	-10921639	389.320	389	326	456	37764	21.165	1.900	0.014	0.515
598	ID36931778	36931778	118	3.811	192.475	57.085	0	2882.382	6	0.500	1	-10921639	363.588	366	307	399	35268	17.617	1.652	0.006	0.240
599	ID37090503	37090503	118	6.047	190.422	59.508	0	3362.779	7	0.500	1	-10921639	367.742	365	314	451	35671	27.038	0.478	0.018	0.473
600	ID36932937	36932937	119	4.148	186.636	61.073	0	2882.382	6	0.500	1	-10921639	381.619	381	319	454	37017	23.132	1.273	0.010	0.325
601	ID37090661	37090661	119	4.858	185.166	58.923	0	3362.779	7	0.500	1	-10921639	381.423	379	307	439	36998	23.319	0.490	0.013	0.413
602	ID37145610	37145610	119	12.229	185.842	59.822	0	3843.176	8	0.500	1	-10921639	384.577	370	319	520	37304	45.271	0.485	0.041	0.671
603	ID36941888	36941888	119	15.870	184.516	60.216	0	4323.573	9	0.500	1	-10921639	368.216	351	283	543	35717	53.922	0.480	0.056	0.720
604	ID37159682	37159682	120	7.687	173.543	89.030	0	2401.985	5	0.500	1	-10921639	391.619	384	334	486	37987	31.446	0.485	0.018	0.441
605	ID36944525	36944525	120	7.117	173.592	88.812	0	2882.382	6	0.500	1	-10921639	380.794	375	302	509	36937	33.266	1.900	0.030	0.666
606	ID37112089	37112089	120	6.277	173.132	89.032	0	3362.779	7	0.500	1	-10921639	365.082	360	271	477	35413	30.443	1.900	0.016	0.384
607	ID37166567	37166567	120	4.874	172.978	89.479	0	3843.176	8	0.500	1	-10921639	345.691	341	291	420	33532	24.464	0.478	0.013	0.371
608	ID37117087	37117087	121	6.662	107.883	95.793	0	3362.779	7	0.500	1	-10921639	377.371	375	296	468	36605	27.673	1.772	0.026	0.679
609	ID37171506	37171506	121	5.892	108.320	95.343	0	3843.176	8	0.500	1	-10921639	359.464	355	293	471	34868	31.036	1.393	0.015	0.338
610	ID36960033	36960033	121	5.264	107.405	95.175	0	4323.573	9	0.500	1	-10921639	340.567	336	272	437	33035	26.625	0.491	0.016	0.400
611	ID37134010	37134010	122	4.745	135.956	41.441	0	3843.176	8	0.500	1	-10921639	343.660	339	284	416	33335	25.677	0.484	0.020	0.536
612	ID36933176	36933176	122	4.999	134.337	41.177	0	4323.573	9	0.500	1	-10921639	325.546	322	266	406	31578	23.684	1.782	0.016	0.442
613	ID37068718	37068718	123	7.538	133.447	28.538	0	3362.779	7	0.500	1	-10921639	364.804	359	314	472	35386	30.995	0.481	0.024	0.556
614	ID37125038	37125038	123	8.717	133.432	28.433	0	3843.176	8	0.500	1	-10921639	356.041	347	301	455	34536	33.131	1.801	0.027	0.571
615	ID36929261	36929261	123	5.496	133.056	29.101	0	4323.573	9	0.500	1	-10921639	324.577	318	285	399	31484	25.298	0.482	0.023	0.568
616	ID37165729	37165729	124	5.350	178.062	170.265	0	3362.779	7	0.500	1	-10921639	374.021	374	297	440	36280	25.317	0.488	0.015	0.424
617	ID37215387	37215387	124	9.438	177.523	169.989	0	3843.176	8	0.500	1	-10921639	370.216	362	304	474	35911	35.786	0.487	0.032	0.649
618	ID37021327	37021327	124	7.454	176.958	170.670	0	4323.573	9	0.500	1	-10921639	336.907	331	256	462	32680	32.831	1.900	0.029	0.573
619	ID37175055	37175055	125	5.002	59.100	98.971	0	3843.176	8	0.500	1	-10921639	359.381	359	281	438	34860	30.235	1.900	0.018	0.411
620	ID36967081	36967081	125	3.743	58.837	98.992	0	4323.573	9	0.500	1	-10921639	334.278	332	252	428	32425	23.524	1.900	0.013	0.358
621	ID37134796	37134796	126	4.479	137.128	38.309	0	3843.176	8	0.500	1	-10921639	339.289	338	289	420	32911	23.909	1.900	0.019	0.535
622	ID36932304	36932304	126	6.486	137.861	37.367	0	4323.573	9	0.500	1	-10921639	328.330	326	279	418	31848	27.561	0.480	0.021	0.500
623	ID37217549	37217549	127	4.814	114.601	170.467	0	3843.176	8	0.500	1	-10921639	347.711	347	285	416	33728	25.421	0.480	0.013	0.354
624	ID37021581	37021581	127	7.223	114.497	170.987	0	4323.573	9	0.500	1	-10921639	336.649	328	265	453	32655	33.444	0.479	0.025	0.485
625	ID37192525	37192525	128	8.486	77.641	215.836	0	3362.779	7	0.500	1	-10921639	372.918	367	300	473	36173	32.695	0.492	0.026	0.580
626	ID37237510	37237510	128	7.320	78.725	214.629	0	3843.176	8	0.500	1	-10921639	341.237	336	270	446	33100	31.509	0.475	0.027	0.571
627	ID37052275	37052275	128	5.330	77.545	214.614	0	4323.573	9	0.500	1	-10921639	327.639	326	276	400	31781	22.718	1.900	0.019	0.539
628	ID37137159	37137159	129	5.427	193.936	127.263	0	3362.779	7	0.500	1	-10921639	355.495	356	290	418	34483	27.475	1.900	0.020	0.503
629	ID37195699	37195699	129	4.588	195.395	127.703	0	3843.176	8	0.500	1	-10921639	334.608	330	276	417	32457	27.072	1.900	0.017	0.410
630	ID37175135	37175135	130	4.549	24.293	105.577	0	2401.985	5	0.500	1	-10921639	379.887	379	324	440	36849	22.689	1.609	0.004	0.119
631	ID36950665	36950665	130	4.510	23.984	105.797	0	2882.382	6	0.500	1	-10921639	370.948	369	310	445	35982	23.235	0.712	0.016	0.507
632	ID37148487	37148487	131	4.426	134.422	77.885	0	2401.985	5	0.500	1	-10921639	410.845	412	361	461	39852	21.695	1.636	0.010	0.365
633	ID36936845	36936845	131	3.919	134.085	77.824	0	2882.382	6	0.500	1	-10921639	407.639	409	324	458	39541	23.834	0.704	0.013	0.427
634	ID36998969	36998969	132	4.041	186.972	60.820	0	960.794	2	0.500	1	-10921639	405.021	406	354	456	39287	21.033	1.900	0.012	0.458
635	ID36984020	36984020	132	4.359	187.083	60.842	0	1441.191	3	0.500	1	-10921639	400.701	401	343	456	38868	24.995	0.493	0.013	0.414
636	ID36975506	36975506	133	4.518	116.878	36.630	0	960.794	2	0.500	1	-10921639	404.649	405	334	515	39251	26.627	1.796	0.016	0.486
637	ID36958715	36958715	133	4.730	117.426	37.210	0	1441.191	3	0.500	1	-10921639	399.825	399	315	495	38783	26.680	1.779	0.015	0.437
638	ID37120024	37120024	134	4.881	127.430	209.672	0	960.794	2	0.500	1	-10921639	377.381	373	331	490	36606	27.238	1.798	0.014	0.386
639	ID37091916	37091916	134	7.066	128.056	208.685	0	1441.191	3	0.500	1	-10921639	388.526	386	322	488	37687	30.769	0.487	0.026	0.631
640	ID36996459	36996459	135	3.753	177.976	65.833	0	960.794	2	0.500	1	-10921639	397.948	396	310	452	38601	22.484	1.396	0.002	0.080
641	ID36987696	36987696	135	4.165	178.565	66.144	0	1441.191	3	0.500	1	-10921639	393.216	392	350	454	38142	22.399	1.900	0.011	0.378
642	ID37010132	37010132	136	12.376	55.660	77.221	0	960.794	2	0.500	1	-10921639	422.186	407	345	579	40952	49.592	0.480	0.036	0.586
643	ID36994069	36994069	136	8.064	56.131	77.434	0	1441.191	3	0.500	1	-10921639	408.608	399	339	526	39635	35.898	1.792	0.030	0.657
