# Supplementary material for: The structure of the Ctf19c/CCAN from budding yeast
Source: eLife journal article supplement (doi:10.7554/elife.44239), 2019-02-14
Supplement: supp [file set3_s15_mcherry.xls]

	Label	ID	TRACK_ID	QUALITY	POSITION_X	POSITION_Y	POSITION_Z	POSITION_T	FRAME	RADIUS	VISIBILITY	MANUAL_COLOR	MEAN_INTENSITY	MEDIAN_INTENSITY	MIN_INTENSITY	MAX_INTENSITY	TOTAL_INTENSITY	STANDARD_DEVIATION	ESTIMATED_DIAMETER	CONTRAST	SNR
1	ID37847367	37847367	0	1.112	65.396	58.744	0	0.000	0	0.500	1	-10921639	121.258	120	110	141	11762	5.705	0.490	0.012	0.490
2	ID37635684	37635684	0	0.954	65.244	57.614	0	480.397	1	0.500	1	-10921639	121.845	121	109	155	11819	6.734	1.710	0.010	0.359
3	ID37932881	37932881	0	1.376	65.818	58.581	0	960.794	2	0.500	1	-10921639	121.619	120	109	146	11797	7.070	1.591	0.012	0.406
4	ID37636362	37636362	0	1.259	65.735	57.454	0	1441.191	3	0.500	1	-10921639	123.711	123	111	153	12000	7.250	1.802	0.016	0.522
5	ID37730720	37730720	0	2.041	67.288	56.892	0	1921.588	4	0.500	1	-10921639	123.186	122	111	153	11949	8.445	1.900	0.025	0.724
6	ID37679624	37679624	0	2.292	67.051	56.475	0	2401.985	5	0.500	1	-10921639	124.680	122	112	151	12094	9.231	0.703	0.021	0.546
7	ID37833399	37833399	0	2.240	66.594	55.860	0	2882.382	6	0.500	1	-10921639	124.309	122	109	154	12058	9.239	0.486	0.028	0.733
8	ID37646632	37646632	0	1.818	66.891	56.930	0	3362.779	7	0.500	1	-10921639	123.804	122	110	157	12009	7.808	0.491	0.025	0.775
9	ID37804510	37804510	0	1.282	66.738	56.414	0	3843.176	8	0.500	1	-10921639	122.773	121	114	160	11909	6.947	1.900	0.010	0.343
10	ID37811836	37811836	0	1.445	65.853	58.133	0	4323.573	9	0.500	1	-10921639	121.691	121	111	153	11804	6.634	0.479	0.017	0.605
11	ID37882443	37882443	1	1.178	59.686	97.334	0	0.000	0	0.500	1	-10921639	121.598	121	110	137	11795	6.412	1.780	0.015	0.561
12	ID37667493	37667493	1	1.372	60.297	97.153	0	480.397	1	0.500	1	-10921639	122.330	121	112	144	11866	6.842	0.489	0.014	0.502
13	ID37951287	37951287	1	1.305	60.569	96.987	0	960.794	2	0.500	1	-10921639	123.021	123	113	143	11933	5.704	1.787	0.011	0.479
14	ID37653859	37653859	1	1.193	60.541	96.989	0	1441.191	3	0.500	1	-10921639	122.794	121	109	166	11911	7.018	1.900	0.013	0.444
15	ID37755700	37755700	1	1.109	59.474	96.615	0	1921.588	4	0.500	1	-10921639	122.052	122	111	141	11839	5.589	0.722	0.015	0.642
16	ID37702926	37702926	1	1.286	59.399	96.488	0	2401.985	5	0.500	1	-10921639	122.505	122	109	154	11883	7.360	0.703	0.011	0.355
17	ID37877749	37877749	1	1.146	59.296	96.878	0	2882.382	6	0.500	1	-10921639	122.186	122	112	143	11852	5.376	1.799	0.007	0.320
18	ID37672427	37672427	1	1.223	59.043	97.511	0	3362.779	7	0.500	1	-10921639	120.969	120	111	142	11734	6.415	1.395	0.016	0.602
19	ID37840693	37840693	1	1.180	59.132	99.032	0	3843.176	8	0.500	1	-10921639	120.093	119	110	133	11649	5.627	0.481	0.014	0.607
20	ID37837469	37837469	1	0.904	58.848	99.070	0	4323.573	9	0.500	1	-10921639	119.031	118	109	139	11546	5.787	0.898	0.010	0.425
21	ID37944136	37944136	2	1.304	124.359	205.365	0	0.000	0	0.500	1	-10921639	122.062	121	113	139	11840	6.293	0.477	0.015	0.566
22	ID37777067	37777067	2	0.964	124.988	205.531	0	480.397	1	0.500	1	-10921639	120.485	120	109	140	11687	6.205	1.804	0.008	0.320
23	ID37927500	37927500	3	0.898	11.114	166.030	0	0.000	0	0.500	1	-10921639	118.536	118	110	139	11498	5.955	0.482	0.005	0.198
24	ID37744412	37744412	3	1.060	10.867	165.280	0	480.397	1	0.500	1	-10921639	119.351	118	110	134	11577	5.944	0.708	0.012	0.462
25	ID37693537	37693537	3	1.521	9.523	164.279	0	1441.191	3	0.500	1	-10921639	120.072	118	109	146	11647	7.450	1.900	0.016	0.499
26	ID37808509	37808509	3	1.239	8.610	163.754	0	1921.588	4	0.500	1	-10921639	118.835	118	109	141	11527	6.008	1.611	0.007	0.258
27	ID37746621	37746621	3	1.330	9.931	163.700	0	2401.985	5	0.500	1	-10921639	119.639	119	110	137	11605	6.166	0.489	0.014	0.544
28	ID37930720	37930720	3	1.409	9.734	164.377	0	2882.382	6	0.500	1	-10921639	121.093	120	110	138	11746	5.694	1.900	0.014	0.600
29	ID37727445	37727445	3	1.268	9.864	164.497	0	3362.779	7	0.500	1	-10921639	120.887	120	111	135	11726	5.701	0.485	0.011	0.463
30	ID37883183	37883183	3	1.489	9.927	164.767	0	3843.176	8	0.500	1	-10921639	120.536	119	111	143	11692	6.739	0.468	0.013	0.456
31	ID37884390	37884390	3	1.049	9.838	164.883	0	4323.573	9	0.500	1	-10921639	119.423	119	108	146	11584	6.771	0.496	0.013	0.447
32	ID37817678	37817678	4	1.275	18.191	22.799	0	0.000	0	0.500	1	-10921639	120.876	120	110	156	11725	7.329	0.487	0.016	0.514
33	ID37616808	37616808	4	1.292	19.034	22.966	0	480.397	1	0.500	1	-10921639	119.320	118	109	139	11574	6.419	0.711	0.015	0.556
34	ID37819224	37819224	5	1.373	103.945	24.394	0	0.000	0	0.500	1	-10921639	122.763	120	111	154	11908	7.870	0.486	0.015	0.474
35	ID37619206	37619206	5	1.485	105.004	25.143	0	480.397	1	0.500	1	-10921639	123.330	121	110	148	11963	6.773	0.705	0.018	0.634
36	ID37907437	37907437	5	1.468	103.852	23.746	0	960.794	2	0.500	1	-10921639	122.515	121	112	147	11884	6.973	0.484	0.018	0.637
37	ID37623359	37623359	5	1.408	104.187	23.626	0	1441.191	3	0.500	1	-10921639	123.619	124	111	142	11991	6.347	1.389	0.013	0.497
38	ID37713844	37713844	5	1.903	103.936	24.040	0	1921.588	4	0.500	1	-10921639	124.062	123	109	148	12034	8.014	0.478	0.021	0.636
39	ID37653232	37653232	5	1.751	103.929	24.133	0	2401.985	5	0.500	1	-10921639	124.351	123	112	157	12062	7.316	0.320	0.014	0.478
40	ID37901915	37901915	6	0.964	1.775	118.843	0	0.000	0	0.500	1	-10921639	121.309	121	106	155	11767	6.755	1.216	0.009	0.321
41	ID37691868	37691868	6	1.013	2.623	118.315	0	480.397	1	0.500	1	-10921639	120.526	120	110	145	11691	6.558	0.700	0.008	0.287
42	ID37959795	37959795	6	0.995	2.415	118.705	0	960.794	2	0.500	1	-10921639	119.371	119	107	144	11579	6.264	1.698	0.009	0.356
43	ID37663880	37663880	6	0.899	2.238	118.907	0	1441.191	3	0.500	1	-10921639	118.041	117	107	141	11450	6.043	0.481	0.010	0.379
44	ID37766536	37766536	6	0.909	2.789	118.436	0	1921.588	4	0.500	1	-10921639	118.825	119	109	137	11526	5.517	1.825	0.012	0.518
45	ID37932635	37932635	7	1.842	184.918	172.809	0	0.000	0	0.500	1	-10921639	123.134	122	113	149	11944	7.932	1.900	0.018	0.548
46	ID37743680	37743680	7	1.757	185.226	172.230	0	480.397	1	0.500	1	-10921639	123.897	122	113	144	12018	6.726	0.707	0.016	0.569
47	ID37968564	37968564	7	1.700	185.450	172.002	0	960.794	2	0.500	1	-10921639	122.577	122	110	144	11890	6.976	0.486	0.016	0.544
48	ID37698614	37698614	7	1.042	185.732	171.763	0	1441.191	3	0.500	1	-10921639	121.784	122	109	140	11813	5.613	0.717	0.010	0.439
49	ID37813496	37813496	7	1.400	185.448	172.561	0	1921.588	4	0.500	1	-10921639	122.876	122	113	144	11919	6.037	1.618	0.011	0.453
50	ID37755411	37755411	7	1.501	185.397	171.530	0	2401.985	5	0.500	1	-10921639	123.124	122	112	138	11943	6.369	1.792	0.014	0.541
51	ID37947258	37947258	7	1.316	185.369	171.809	0	2882.382	6	0.500	1	-10921639	122.794	122	113	152	11911	6.554	1.592	0.015	0.568
52	ID37737083	37737083	7	1.127	185.742	172.197	0	3362.779	7	0.500	1	-10921639	121.742	121	113	137	11809	5.417	1.593	0.011	0.493
53	ID37888696	37888696	7	1.244	186.216	172.227	0	3843.176	8	0.500	1	-10921639	121.753	122	111	137	11810	5.570	0.711	0.013	0.552
54	ID37882564	37882564	7	1.083	185.135	172.317	0	4323.573	9	0.500	1	-10921639	121.155	120	111	148	11752	6.485	1.580	0.009	0.316
55	ID37904473	37904473	8	1.524	157.795	120.575	0	0.000	0	0.500	1	-10921639	121.804	120	111	143	11815	7.141	0.480	0.013	0.453
56	ID37686747	37686747	8	0.935	158.232	120.995	0	480.397	1	0.500	1	-10921639	120.330	120	109	139	11672	6.091	1.900	0.011	0.418
57	ID37960571	37960571	8	0.904	158.015	120.212	0	960.794	2	0.500	1	-10921639	120.041	119	109	142	11644	5.425	1.786	0.008	0.363
58	ID37766879	37766879	8	1.240	159.025	120.380	0	1921.588	4	0.500	1	-10921639	122.433	122	112	142	11876	5.295	1.815	0.005	0.210
59	ID37716611	37716611	8	0.951	158.826	120.278	0	2401.985	5	0.500	1	-10921639	121.072	121	111	141	11744	5.630	0.494	0.010	0.419
60	ID37894971	37894971	8	0.895	158.341	119.658	0	2882.382	6	0.500	1	-10921639	120.732	119	111	148	11711	6.111	0.489	0.009	0.365
61	ID37948766	37948766	9	1.091	130.194	218.286	0	0.000	0	0.500	1	-10921639	124.979	124	110	149	12123	6.535	1.781	0.010	0.385
62	ID37789081	37789081	9	1.341	130.278	218.610	0	480.397	1	0.500	1	-10921639	125.423	125	114	148	12166	6.653	1.900	0.009	0.353
63	ID37975826	37975826	9	1.376	130.921	218.055	0	960.794	2	0.500	1	-10921639	125.588	125	114	143	12182	6.203	1.813	0.015	0.590
64	ID37732007	37732007	9	1.562	131.396	218.175	0	1441.191	3	0.500	1	-10921639	126.247	124	115	151	12246	7.862	0.492	0.012	0.386
65	ID37860902	37860902	9	1.208	131.260	217.942	0	1921.588	4	0.500	1	-10921639	125.876	125	112	158	12210	7.280	1.900	0.016	0.532
66	ID37794916	37794916	9	1.042	131.194	218.039	0	2401.985	5	0.500	1	-10921639	124.010	123	113	145	12029	6.150	0.896	0.012	0.472
67	ID37956876	37956876	9	1.415	130.893	217.782	0	2882.382	6	0.500	1	-10921639	126.227	125	115	145	12244	6.376	1.900	0.010	0.383
68	ID37777924	37777924	9	0.901	130.381	218.137	0	3362.779	7	0.500	1	-10921639	123.979	123	115	141	12026	5.194	1.900	0.011	0.539
69	ID37782808	37782808	9	0.908	131.424	217.713	0	3362.779	7	0.500	1	-10921639	121.794	121	111	148	11814	5.897	1.697	0.007	0.274
70	ID37927505	37927505	9	1.119	129.921	217.791	0	3843.176	8	0.500	1	-10921639	123.856	123	111	141	12014	5.898	0.486	0.008	0.321
71	ID37907808	37907808	10	1.583	47.996	133.500	0	0.000	0	0.500	1	-10921639	120.474	119	107	151	11686	6.608	1.810	0.013	0.466
72	ID37698092	37698092	10	1.879	48.308	131.312	0	480.397	1	0.500	1	-10921639	120.938	118	110	146	11731	8.209	0.490	0.018	0.519
73	ID37961390	37961390	10	1.823	48.858	129.901	0	960.794	2	0.500	1	-10921639	121.227	119	109	153	11759	8.515	1.599	0.013	0.366
74	ID37671457	37671457	10	1.587	48.844	131.282	0	1441.191	3	0.500	1	-10921639	121.320	120	111	151	11768	7.181	1.785	0.016	0.547
75	ID37778504	37778504	10	1.955	48.504	131.371	0	1921.588	4	0.500	1	-10921639	121.526	119	110	168	11788	9.414	0.314	0.014	0.352
76	ID37731141	37731141	10	1.824	48.532	131.433	0	2401.985	5	0.500	1	-10921639	121.340	120	109	157	11770	8.438	1.900	0.014	0.392
77	ID37907719	37907719	10	1.420	48.452	132.000	0	2882.382	6	0.500	1	-10921639	120.361	119	109	145	11675	7.102	0.488	0.011	0.368
78	ID37699135	37699135	10	1.365	48.678	131.352	0	3362.779	7	0.500	1	-10921639	120.423	120	110	141	11681	6.458	0.708	0.012	0.436
79	ID37886305	37886305	11	2.037	44.344	102.878	0	0.000	0	0.500	1	-10921639	121.309	120	109	148	11767	8.300	0.493	0.022	0.622
80	ID37674060	37674060	11	1.720	44.781	103.841	0	480.397	1	0.500	1	-10921639	121.165	119	110	141	11753	7.193	0.491	0.016	0.544
81	ID37955214	37955214	11	1.167	45.329	102.792	0	960.794	2	0.500	1	-10921639	119.268	119	110	134	11569	5.442	1.900	0.009	0.371
82	ID37656894	37656894	11	0.944	45.779	103.125	0	1441.191	3	0.500	1	-10921639	120.072	120	112	139	11647	4.933	1.900	0.010	0.471
83	ID37757592	37757592	11	1.039	46.114	103.069	0	1921.588	4	0.500	1	-10921639	119.814	119	110	143	11622	5.785	0.483	0.012	0.480
84	ID37708884	37708884	11	1.355	46.039	102.383	0	2401.985	5	0.500	1	-10921639	120.794	120	107	141	11717	6.014	1.821	0.011	0.429
85	ID37878646	37878646	11	0.960	45.322	102.640	0	2882.382	6	0.500	1	-10921639	119.021	118	106	137	11545	5.779	1.603	0.008	0.343
86	ID37678073	37678073	11	1.171	45.988	103.514	0	3362.779	7	0.500	1	-10921639	119.814	119	111	138	11622	5.306	0.492	0.013	0.578
87	ID37843204	37843204	11	0.897	45.730	104.012	0	3843.176	8	0.500	1	-10921639	119.247	119	109	134	11567	5.206	1.626	0.013	0.569
88	ID37839447	37839447	11	1.123	45.909	103.530	0	4323.573	9	0.500	1	-10921639	118.794	118	107	138	11523	6.161	0.484	0.009	0.355
89	ID37942625	37942625	12	2.577	127.941	204.113	0	0.000	0	0.500	1	-10921639	125.082	121	111	166	12133	10.429	0.463	0.020	0.460
90	ID37767775	37767775	12	1.928	128.599	203.368	0	480.397	1	0.500	1	-10921639	123.784	122	111	153	12007	7.479	0.717	0.021	0.683
91	ID37973244	37973244	12	1.923	128.314	203.940	0	960.794	2	0.500	1	-10921639	123.773	122	111	148	12006	7.523	0.482	0.023	0.753
92	ID37722823	37722823	12	1.832	128.094	205.237	0	1441.191	3	0.500	1	-10921639	124.165	121	110	175	12044	9.706	0.704	0.019	0.473
93	ID37846673	37846673	12	1.776	128.688	205.170	0	1921.588	4	0.500	1	-10921639	122.588	121	109	147	11891	7.504	0.483	0.017	0.545
94	ID37777366	37777366	12	1.649	128.881	205.297	0	2401.985	5	0.500	1	-10921639	123.433	122	112	149	11973	7.695	1.900	0.019	0.595
95	ID37953640	37953640	12	1.620	127.820	205.544	0	2882.382	6	0.500	1	-10921639	123.351	121	112	151	11965	7.768	1.791	0.014	0.450
96	ID37760232	37760232	12	1.171	128.914	205.058	0	3362.779	7	0.500	1	-10921639	120.773	120	107	139	11715	6.531	1.802	0.013	0.457
97	ID37921382	37921382	13	2.200	177.328	153.452	0	0.000	0	0.500	1	-10921639	128.701	128	115	150	12484	8.272	1.394	0.019	0.590
98	ID37722471	37722471	13	1.214	177.758	153.574	0	480.397	1	0.500	1	-10921639	124.794	124	113	142	12105	6.122	1.900	0.013	0.515
99	ID37965605	37965605	13	1.288	177.804	153.486	0	960.794	2	0.500	1	-10921639	123.443	123	112	144	11974	6.247	1.796	0.007	0.283
100	ID37684348	37684348	13	1.221	178.812	153.809	0	1441.191	3	0.500	1	-10921639	123.660	123	111	151	11995	6.422	1.802	0.015	0.553
101	ID37683954	37683954	13	0.961	177.919	153.589	0	1441.191	3	0.500	1	-10921639	122.856	123	113	138	11917	5.087	1.790	0.007	0.344
102	ID37810563	37810563	13	1.171	177.929	153.425	0	1921.588	4	0.500	1	-10921639	122.402	121	108	146	11873	6.631	1.402	0.009	0.314
103	ID37810568	37810568	13	1.160	178.886	153.403	0	1921.588	4	0.500	1	-10921639	123.691	123	113	145	11998	6.025	1.790	0.016	0.660
104	ID37742867	37742867	13	1.119	177.624	154.162	0	2401.985	5	0.500	1	-10921639	121.072	120	110	138	11744	5.553	1.900	0.015	0.624
105	ID37744397	37744397	13	1.690	178.641	152.169	0	2401.985	5	0.500	1	-10921639	123.196	122	108	146	11950	7.740	0.487	0.023	0.722
106	ID37919731	37919731	13	1.800	179.113	152.389	0	2882.382	6	0.500	1	-10921639	123.464	122	112	158	11976	7.994	1.900	0.019	0.567
107	ID37927793	37927793	13	2.194	176.513	155.411	0	2882.382	6	0.500	1	-10921639	123.608	122	110	156	11990	9.208	0.485	0.018	0.481
108	ID37724029	37724029	13	1.686	175.811	156.067	0	3362.779	7	0.500	1	-10921639	122.072	120	110	153	11841	7.821	0.485	0.019	0.571
109	ID37722223	37722223	13	1.992	180.259	152.581	0	3362.779	7	0.500	1	-10921639	123.742	122	111	144	12003	8.124	0.486	0.017	0.513
110	ID37877074	37877074	13	1.624	176.102	156.183	0	3843.176	8	0.500	1	-10921639	122.144	121	111	147	11848	7.137	0.487	0.021	0.706
111	ID37877906	37877906	13	1.564	178.907	152.813	0	3843.176	8	0.500	1	-10921639	122.814	120	111	156	11913	7.946	0.486	0.014	0.435
112	ID37877284	37877284	13	1.270	175.604	155.220	0	4323.573	9	0.500	1	-10921639	121.649	122	112	144	11800	6.095	0.705	0.014	0.534
113	ID37871442	37871442	13	1.547	178.341	152.980	0	4323.573	9	0.500	1	-10921639	122.608	122	110	140	11893	6.432	1.612	0.019	0.711
114	ID37862251	37862251	14	1.292	116.218	68.943	0	0.000	0	0.500	1	-10921639	123.010	122	111	144	11932	6.951	1.900	0.015	0.536
115	ID37640780	37640780	14	0.912	116.893	68.551	0	480.397	1	0.500	1	-10921639	121.619	121	110	144	11797	6.138	1.792	0.013	0.496
116	ID37939329	37939329	14	0.913	116.953	68.839	0	960.794	2	0.500	1	-10921639	120.845	120	111	136	11722	5.657	1.817	0.007	0.295
117	ID37641326	37641326	14	1.606	117.169	70.193	0	1441.191	3	0.500	1	-10921639	121.938	121	111	146	11828	7.547	0.484	0.009	0.276
118	ID37739713	37739713	14	1.245	117.382	71.550	0	1921.588	4	0.500	1	-10921639	119.794	118	110	145	11620	6.669	0.486	0.011	0.408
119	ID37686760	37686760	14	1.503	117.411	70.700	0	2401.985	5	0.500	1	-10921639	121.103	120	111	143	11747	6.684	1.900	0.010	0.352
120	ID37849045	37849045	14	1.156	117.304	70.275	0	2882.382	6	0.500	1	-10921639	120.392	120	110	136	11678	5.520	0.706	0.010	0.420
121	ID37653566	37653566	14	1.138	117.694	70.991	0	3362.779	7	0.500	1	-10921639	120.876	120	112	140	11725	5.672	0.487	0.013	0.557
122	ID37816635	37816635	14	1.233	117.465	70.845	0	3843.176	8	0.500	1	-10921639	119.794	118	108	141	11620	6.253	0.489	0.015	0.578
123	ID37822466	37822466	14	1.046	117.668	71.305	0	4323.573	9	0.500	1	-10921639	119.660	118	109	139	11607	5.991	1.784	0.008	0.331
124	ID37816689	37816689	15	1.320	17.418	21.725	0	0.000	0	0.500	1	-10921639	121.124	120	108	151	11749	7.362	1.698	0.016	0.531
125	ID37616254	37616254	15	0.932	18.190	21.605	0	480.397	1	0.500	1	-10921639	119.495	118	106	136	11591	5.748	1.788	0.011	0.434
126	ID37897787	37897787	15	1.099	18.010	21.255	0	960.794	2	0.500	1	-10921639	120.062	119	111	139	11646	5.893	1.797	0.011	0.435
127	ID37622579	37622579	15	0.955	17.920	21.147	0	1441.191	3	0.500	1	-10921639	120.474	120	109	139	11686	5.777	0.706	0.015	0.608
128	ID37706147	37706147	15	1.338	16.522	20.569	0	1921.588	4	0.500	1	-10921639	120.392	119	110	144	11678	6.689	1.900	0.017	0.593
129	ID37655361	37655361	15	1.342	16.665	21.013	0	2401.985	5	0.500	1	-10921639	121.629	121	110	140	11798	6.232	1.774	0.012	0.456
130	ID37805048	37805048	15	1.133	17.215	20.847	0	2882.382	6	0.500	1	-10921639	121.835	121	112	141	11818	5.787	0.704	0.007	0.299
131	ID37932660	37932660	16	1.456	109.629	172.934	0	0.000	0	0.500	1	-10921639	122.134	121	110	160	11847	7.103	1.900	0.014	0.492
132	ID37748083	37748083	16	1.501	110.152	172.435	0	480.397	1	0.500	1	-10921639	122.443	121	111	153	11877	6.972	0.714	0.015	0.514
133	ID37700358	37700358	16	0.951	111.047	172.407	0	1441.191	3	0.500	1	-10921639	120.351	119	110	136	11674	5.408	1.805	0.012	0.547
134	ID37818806	37818806	16	1.238	110.249	172.411	0	1921.588	4	0.500	1	-10921639	122.062	122	110	141	11840	5.798	0.481	0.016	0.645
135	ID37934714	37934714	17	1.090	219.276	183.693	0	0.000	0	0.500	1	-10921639	123.763	123	113	146	12005	5.919	1.730	0.007	0.310
136	ID37752082	37752082	17	0.984	219.362	184.124	0	480.397	1	0.500	1	-10921639	123.082	123	112	141	11939	5.746	1.723	0.010	0.443
137	ID37970701	37970701	17	1.048	219.046	183.619	0	960.794	2	0.500	1	-10921639	121.485	121	112	138	11784	5.456	1.684	0.013	0.586
138	ID37826904	37826904	17	0.965	219.369	183.042	0	1921.588	4	0.500	1	-10921639	122.577	122	112	140	11890	6.103	1.900	0.004	0.177
139	ID37759731	37759731	17	1.815	217.278	183.895	0	2401.985	5	0.500	1	-10921639	122.938	121	112	146	11925	7.464	0.477	0.014	0.456
140	ID37941610	37941610	17	1.608	215.847	183.921	0	2882.382	6	0.500	1	-10921639	122.010	121	111	148	11835	7.456	0.486	0.013	0.409
141	ID37744443	37744443	17	1.557	216.494	183.470	0	3362.779	7	0.500	1	-10921639	122.165	122	109	148	11850	7.035	1.776	0.019	0.643
142	ID37896892	37896892	17	1.592	216.840	184.062	0	3843.176	8	0.500	1	-10921639	121.794	121	109	146	11814	7.166	0.471	0.018	0.599
143	ID37888306	37888306	17	1.346	216.589	184.007	0	4323.573	9	0.500	1	-10921639	120.649	120	110	154	11703	7.068	0.488	0.016	0.531
144	ID37831290	37831290	18	1.008	203.829	37.096	0	0.000	0	0.500	1	-10921639	122.680	123	110	137	11900	5.850	1.900	0.010	0.422
145	ID37626217	37626217	18	1.084	204.161	36.440	0	480.397	1	0.500	1	-10921639	122.237	122	112	138	11857	5.334	1.605	0.007	0.339
146	ID37914461	37914461	18	1.467	203.957	36.608	0	960.794	2	0.500	1	-10921639	124.031	124	107	140	12031	6.337	0.713	0.013	0.518
147	ID37628353	37628353	18	1.435	203.772	36.511	0	1441.191	3	0.500	1	-10921639	122.773	121	111	142	11909	6.717	0.481	0.007	0.269
148	ID37716737	37716737	18	1.505	204.079	36.345	0	1921.588	4	0.500	1	-10921639	123.845	123	111	148	12013	6.791	0.487	0.013	0.451
149	ID37661687	37661687	18	1.358	203.846	36.599	0	2401.985	5	0.500	1	-10921639	123.464	122	111	148	11976	7.203	1.900	0.009	0.293
150	ID37661429	37661429	18	1.620	204.346	36.184	0	2401.985	5	0.500	1	-10921639	123.649	122	112	144	11994	6.859	0.482	0.012	0.412
151	ID37816017	37816017	18	1.476	204.119	36.318	0	2882.382	6	0.500	1	-10921639	122.979	123	110	140	11929	6.639	0.716	0.015	0.551
152	ID37824033	37824033	18	1.044	203.346	37.173	0	2882.382	6	0.500	1	-10921639	120.835	120	111	142	11721	5.791	1.900	0.012	0.490
153	ID37631233	37631233	18	1.695	205.203	35.757	0	3362.779	7	0.500	1	-10921639	121.505	120	110	145	11786	6.655	0.485	0.016	0.575
154	ID37784145	37784145	18	1.679	205.940	35.901	0	3843.176	8	0.500	1	-10921639	121.082	120	110	144	11745	7.285	1.900	0.017	0.551
155	ID37801510	37801510	18	1.496	204.286	35.478	0	4323.573	9	0.500	1	-10921639	120.320	119	107	143	11671	6.622	0.487	0.016	0.555
156	ID37933177	37933177	19	1.105	111.521	174.544	0	0.000	0	0.500	1	-10921639	120.845	120	107	143	11722	6.092	0.488	0.015	0.596
157	ID37749106	37749106	19	1.106	112.993	173.543	0	480.397	1	0.500	1	-10921639	120.052	119	109	135	11645	5.999	0.482	0.012	0.467
158	ID37909885	37909885	20	1.106	75.446	132.061	0	0.000	0	0.500	1	-10921639	122.289	122	112	157	11862	5.666	1.808	0.008	0.360
159	ID37699105	37699105	20	1.085	76.169	132.058	0	480.397	1	0.500	1	-10921639	122.134	121	111	141	11847	5.889	0.719	0.014	0.563
160	ID37961625	37961625	20	1.338	75.451	132.134	0	960.794	2	0.500	1	-10921639	121.433	120	110	153	11779	6.432	0.480	0.013	0.478
161	ID37671735	37671735	20	1.196	76.202	132.024	0	1441.191	3	0.500	1	-10921639	122.155	121	111	136	11849	5.621	1.709	0.018	0.752
162	ID37779113	37779113	20	0.987	76.412	131.463	0	1921.588	4	0.500	1	-10921639	121.361	121	112	138	11772	5.038	1.789	0.006	0.306
163	ID37819392	37819392	21	1.088	74.958	24.898	0	0.000	0	0.500	1	-10921639	121.206	121	111	142	11757	6.071	1.689	0.014	0.552
164	ID37615091	37615091	21	1.090	75.830	24.753	0	480.397	1	0.500	1	-10921639	121.010	121	111	138	11738	5.525	0.491	0.010	0.441
165	ID37915904	37915904	22	1.210	196.238	140.033	0	0.000	0	0.500	1	-10921639	121.969	121	111	136	11831	5.709	0.701	0.014	0.570
166	ID37706283	37706283	22	1.348	196.591	139.757	0	480.397	1	0.500	1	-10921639	121.392	121	110	143	11775	6.072	1.811	0.017	0.659
167	ID37963461	37963461	22	1.129	196.916	139.332	0	960.794	2	0.500	1	-10921639	120.402	119	111	148	11679	5.885	1.900	0.013	0.505
168	ID37789563	37789563	22	1.175	196.067	139.874	0	1921.588	4	0.500	1	-10921639	122.144	122	110	141	11848	5.581	0.703	0.005	0.205
169	ID37735201	37735201	22	1.187	196.523	139.862	0	2401.985	5	0.500	1	-10921639	120.856	120	108	155	11723	6.842	1.900	0.016	0.553
170	ID37910339	37910339	22	1.327	196.381	139.636	0	2882.382	6	0.500	1	-10921639	120.619	119	109	143	11700	6.761	0.486	0.015	0.519
171	ID37917152	37917152	22	1.121	195.284	140.921	0	2882.382	6	0.500	1	-10921639	121.412	121	112	134	11777	5.151	1.389	0.007	0.330
172	ID37702467	37702467	22	1.436	197.989	136.675	0	3362.779	7	0.500	1	-10921639	121.134	120	111	139	11750	6.258	0.478	0.011	0.410
173	ID37706931	37706931	22	1.272	194.594	141.443	0	3362.779	7	0.500	1	-10921639	119.351	118	108	142	11577	6.886	1.401	0.015	0.497
174	ID37868256	37868256	22	1.387	198.901	137.171	0	3843.176	8	0.500	1	-10921639	120.928	120	110	142	11730	6.280	1.900	0.018	0.694
175	ID37872927	37872927	22	1.726	195.068	143.066	0	3843.176	8	0.500	1	-10921639	120.876	120	108	157	11725	7.436	1.900	0.019	0.603
176	ID37867527	37867527	22	1.411	197.616	138.089	0	4323.573	9	0.500	1	-10921639	120.124	119	108	148	11652	6.926	1.589	0.017	0.590
177	ID37947904	37947904	23	0.962	125.897	217.607	0	0.000	0	0.500	1	-10921639	120.773	119	108	154	11715	7.452	1.609	0.011	0.358
178	ID37788616	37788616	23	1.166	126.938	218.133	0	480.397	1	0.500	1	-10921639	122.082	121	111	139	11842	6.176	1.900	0.014	0.545
179	ID37975688	37975688	23	1.229	127.686	217.204	0	960.794	2	0.500	1	-10921639	122.216	122	109	138	11855	5.808	0.485	0.011	0.468
180	ID37729985	37729985	23	1.207	127.921	216.896	0	1441.191	3	0.500	1	-10921639	122.134	122	111	139	11847	6.493	0.489	0.016	0.587
181	ID37860028	37860028	23	1.256	127.545	216.946	0	1921.588	4	0.500	1	-10921639	124.268	123	114	153	12054	6.409	1.819	0.011	0.437
182	ID37793986	37793986	23	1.257	127.215	217.144	0	2401.985	5	0.500	1	-10921639	123.474	123	112	144	11977	5.884	1.900	0.013	0.536
183	ID37956747	37956747	23	1.043	127.174	217.434	0	2882.382	6	0.500	1	-10921639	123.320	123	111	141	11962	5.480	1.900	0.009	0.397
184	ID37777814	37777814	23	1.171	127.433	218.051	0	3362.779	7	0.500	1	-10921639	123.794	122	112	159	12008	7.471	1.603	0.008	0.259
185	ID37927291	37927291	23	1.099	127.228	217.485	0	3843.176	8	0.500	1	-10921639	123.784	124	114	146	12007	6.088	0.495	0.005	0.211
186	ID37922079	37922079	23	1.355	126.964	218.139	0	4323.573	9	0.500	1	-10921639	124.340	124	108	163	12061	6.936	1.776	0.011	0.399
187	ID37942279	37942279	24	1.444	197.330	208.004	0	0.000	0	0.500	1	-10921639	125.588	125	112	143	12182	6.162	1.798	0.017	0.692
188	ID37771657	37771657	24	1.954	198.753	209.040	0	480.397	1	0.500	1	-10921639	127.289	125	116	147	12347	7.546	1.832	0.017	0.564
189	ID37973808	37973808	24	1.027	198.645	209.092	0	960.794	2	0.500	1	-10921639	124.268	125	112	139	12054	4.926	1.199	0.003	0.141
190	ID37724530	37724530	24	1.411	198.488	209.253	0	1441.191	3	0.500	1	-10921639	124.753	124	114	141	12101	6.292	1.900	0.013	0.517
191	ID37857769	37857769	24	1.154	198.872	209.571	0	1921.588	4	0.500	1	-10921639	124.124	124	112	141	12040	5.557	0.482	0.009	0.414
192	ID37782107	37782107	24	1.116	198.743	209.689	0	2401.985	5	0.500	1	-10921639	123.784	123	113	151	12007	6.116	1.900	0.014	0.560
193	ID37954656	37954656	24	0.904	198.463	209.119	0	2882.382	6	0.500	1	-10921639	123.010	123	112	140	11932	5.094	1.834	0.010	0.472
194	ID37769136	37769136	24	1.631	199.270	208.979	0	3362.779	7	0.500	1	-10921639	124.258	122	111	145	12053	6.923	0.715	0.018	0.636
195	ID37915629	37915629	24	1.195	199.368	209.354	0	3843.176	8	0.500	1	-10921639	122.897	121	114	144	11921	5.729	1.783	0.008	0.350
196	ID37911301	37911301	24	1.208	198.480	209.677	0	4323.573	9	0.500	1	-10921639	123.433	123	111	138	11973	5.843	0.486	0.013	0.533
197	ID37936138	37936138	25	1.213	102.159	181.314	0	0.000	0	0.500	1	-10921639	121.526	121	111	139	11788	5.979	1.900	0.010	0.399
198	ID37746528	37746528	25	1.141	102.160	180.510	0	480.397	1	0.500	1	-10921639	121.928	122	111	137	11827	5.851	0.723	0.017	0.690
199	ID37968740	37968740	25	1.113	102.051	179.625	0	960.794	2	0.500	1	-10921639	121.526	122	109	137	11788	5.234	1.900	0.012	0.537
200	ID37704426	37704426	25	1.366	102.240	179.771	0	1441.191	3	0.500	1	-10921639	122.577	122	112	143	11890	6.188	1.808	0.012	0.463
201	ID37822653	37822653	25	1.015	102.001	179.948	0	1921.588	4	0.500	1	-10921639	120.536	120	112	135	11692	5.489	0.720	0.015	0.644
202	ID37931529	37931529	26	2.017	104.683	174.889	0	0.000	0	0.500	1	-10921639	122.990	121	111	157	11930	8.543	0.482	0.021	0.584
203	ID37746011	37746011	26	2.305	105.563	175.260	0	480.397	1	0.500	1	-10921639	123.959	121	109	147	12024	8.797	0.484	0.021	0.592
204	ID37969465	37969465	26	1.764	105.478	176.141	0	960.794	2	0.500	1	-10921639	123.134	122	110	145	11944	7.848	0.483	0.019	0.572
205	ID37702124	37702124	26	1.283	105.270	176.462	0	1441.191	3	0.500	1	-10921639	122.680	123	111	144	11900	5.687	0.498	0.013	0.565
206	ID37828702	37828702	26	1.419	105.848	177.120	0	1921.588	4	0.500	1	-10921639	121.216	120	109	140	11758	6.011	0.470	0.016	0.624
207	ID37939356	37939356	26	0.981	106.372	177.365	0	2882.382	6	0.500	1	-10921639	121.381	120	112	143	11774	6.391	1.717	0.010	0.378
208	ID37741378	37741378	26	1.385	106.423	177.952	0	3362.779	7	0.500	1	-10921639	122.649	123	110	138	11897	6.030	1.589	0.016	0.641
209	ID37893773	37893773	26	0.933	106.477	178.013	0	3843.176	8	0.500	1	-10921639	121.093	121	110	134	11746	5.451	1.900	0.010	0.456
210	ID37891275	37891275	26	1.186	105.802	178.044	0	4323.573	9	0.500	1	-10921639	121.392	121	110	144	11775	5.785	1.606	0.011	0.469
211	ID37880847	37880847	27	1.214	171.565	93.229	0	0.000	0	0.500	1	-10921639	120.278	119	108	139	11667	5.505	1.686	0.011	0.459
212	ID37662721	37662721	27	0.985	173.107	93.011	0	480.397	1	0.500	1	-10921639	120.216	120	110	135	11661	5.054	1.784	0.005	0.227
213	ID37952588	37952588	27	0.963	173.019	92.891	0	960.794	2	0.500	1	-10921639	119.237	119	111	142	11566	5.423	0.705	0.012	0.505
214	ID37651555	37651555	27	1.132	172.772	92.521	0	1441.191	3	0.500	1	-10921639	120.072	119	109	148	11647	6.088	1.629	0.009	0.358
215	ID37750360	37750360	27	1.175	172.592	93.130	0	1921.588	4	0.500	1	-10921639	120.206	120	106	138	11660	5.584	0.709	0.008	0.350
216	ID37699941	37699941	27	1.118	172.873	92.369	0	2401.985	5	0.500	1	-10921639	119.392	118	110	137	11581	5.440	1.725	0.010	0.440
217	ID37875924	37875924	27	0.943	172.573	92.976	0	2882.382	6	0.500	1	-10921639	120.113	119	110	138	11651	5.562	0.706	0.005	0.207
218	ID37667757	37667757	27	1.144	173.179	92.844	0	3362.779	7	0.500	1	-10921639	120.701	120	110	150	11708	5.981	1.603	0.013	0.523
219	ID37833694	37833694	27	1.398	173.321	93.454	0	3843.176	8	0.500	1	-10921639	120.072	119	110	141	11647	5.957	1.900	0.018	0.696
220	ID37825041	37825041	28	0.991	134.873	30.380	0	0.000	0	0.500	1	-10921639	121.175	119	110	149	11754	6.702	0.487	0.008	0.282
221	ID37618030	37618030	28	1.139	135.058	29.576	0	480.397	1	0.500	1	-10921639	122.309	122	111	147	11864	6.207	1.498	0.012	0.470
222	ID37906788	37906788	28	0.925	135.121	29.834	0	960.794	2	0.500	1	-10921639	121.907	122	110	148	11825	5.716	0.491	0.009	0.371
223	ID37625970	37625970	28	1.215	134.823	29.780	0	1441.191	3	0.500	1	-10921639	121.784	121	109	146	11813	6.712	0.696	0.007	0.250
224	ID37662945	37662945	28	0.889	135.836	29.675	0	2401.985	5	0.500	1	-10921639	120.258	120	110	142	11665	5.207	1.775	0.006	0.262
225	ID37807491	37807491	28	1.346	137.920	30.499	0	2882.382	6	0.500	1	-10921639	122.351	121	109	157	11868	7.755	1.900	0.017	0.524
226	ID37632984	37632984	28	1.760	138.477	31.240	0	3362.779	7	0.500	1	-10921639	122.835	121	111	180	11915	9.635	1.900	0.017	0.417
227	ID37785780	37785780	28	1.465	138.469	31.737	0	3843.176	8	0.500	1	-10921639	121.639	120	108	172	11799	9.057	0.488	0.010	0.260
228	ID37794398	37794398	28	1.095	138.102	31.013	0	4323.573	9	0.500	1	-10921639	121.021	120	110	176	11739	8.222	1.785	0.016	0.467
229	ID37933842	37933842	29	1.586	0.589	178.023	0	0.000	0	0.500	1	-10921639	121.619	121	109	144	11797	7.420	1.900	0.017	0.555
230	ID37753502	37753502	29	1.256	1.278	177.991	0	480.397	1	0.500	1	-10921639	121.598	120	110	147	11795	7.284	1.104	0.009	0.313
231	ID37968873	37968873	29	1.319	1.923	177.302	0	960.794	2	0.500	1	-10921639	120.330	120	109	140	11672	6.027	0.486	0.015	0.582
232	ID37701635	37701635	29	1.351	1.383	175.945	0	1441.191	3	0.500	1	-10921639	120.402	119	108	165	11679	7.811	0.305	0.012	0.376
233	ID37900566	37900566	30	1.335	4.027	114.748	0	0.000	0	0.500	1	-10921639	121.206	120	107	141	11757	6.814	0.707	0.011	0.376
234	ID37684386	37684386	30	0.967	6.096	115.308	0	480.397	1	0.500	1	-10921639	119.804	119	109	133	11621	4.789	1.597	0.011	0.533
235	ID37958628	37958628	30	0.906	5.292	114.731	0	960.794	2	0.500	1	-10921639	120.031	120	110	136	11643	5.698	1.582	0.005	0.219
236	ID37916699	37916699	31	1.361	82.309	147.940	0	0.000	0	0.500	1	-10921639	122.021	120	111	150	11836	7.444	1.801	0.010	0.334
237	ID37721236	37721236	31	1.921	82.573	149.311	0	480.397	1	0.500	1	-10921639	123.052	121	111	146	11936	8.434	1.900	0.017	0.493
238	ID37963828	37963828	31	1.632	83.252	148.034	0	960.794	2	0.500	1	-10921639	123.144	122	109	150	11945	7.668	1.900	0.020	0.615
239	ID37681074	37681074	31	1.732	83.803	148.071	0	1441.191	3	0.500	1	-10921639	123.258	121	113	157	11956	8.055	1.900	0.012	0.369
240	ID37796997	37796997	31	1.662	83.022	147.861	0	1921.588	4	0.500	1	-10921639	123.196	122	112	145	11950	6.734	0.481	0.014	0.506
241	ID37736703	37736703	31	1.425	84.092	149.243	0	2401.985	5	0.500	1	-10921639	121.876	121	111	141	11822	6.280	0.482	0.017	0.651
242	ID37926156	37926156	31	1.252	83.776	149.556	0	2882.382	6	0.500	1	-10921639	121.588	121	111	148	11794	6.401	1.836	0.015	0.577
243	ID37713105	37713105	31	0.958	83.741	149.608	0	3362.779	7	0.500	1	-10921639	121.021	120	111	142	11739	5.944	1.703	0.012	0.502
244	ID37914392	37914392	32	1.147	199.331	142.450	0	0.000	0	0.500	1	-10921639	122.485	122	114	137	11881	5.372	0.487	0.007	0.296
245	ID37718975	37718975	32	0.969	199.789	142.304	0	480.397	1	0.500	1	-10921639	121.402	121	109	134	11776	4.665	1.189	0.005	0.278
246	ID37963119	37963119	32	1.211	200.040	141.972	0	960.794	2	0.500	1	-10921639	121.000	120	111	141	11737	5.721	0.714	0.015	0.624
247	ID37678147	37678147	32	1.179	199.838	142.268	0	1441.191	3	0.500	1	-10921639	121.557	121	111	140	11791	5.907	0.726	0.011	0.451
248	ID37786808	37786808	32	1.101	199.224	142.215	0	1921.588	4	0.500	1	-10921639	119.969	119	109	150	11637	6.047	0.488	0.012	0.456
249	ID37738976	37738976	32	1.228	198.714	143.391	0	2401.985	5	0.500	1	-10921639	121.598	121	109	142	11795	5.887	1.900	0.010	0.399
250	ID37918155	37918155	32	1.055	198.698	143.610	0	2882.382	6	0.500	1	-10921639	120.845	120	108	141	11722	6.290	1.771	0.018	0.668
251	ID37708827	37708827	32	1.099	198.593	143.423	0	3362.779	7	0.500	1	-10921639	120.639	120	112	148	11702	6.031	1.791	0.008	0.313
252	ID37869434	37869434	32	1.184	198.674	143.886	0	3843.176	8	0.500	1	-10921639	120.103	119	110	151	11650	6.224	0.708	0.013	0.504
253	ID37796892	37796892	33	1.006	70.962	3.581	0	0.000	0	0.500	1	-10921639	120.938	120	110	147	11731	5.903	0.704	0.008	0.328
254	ID37611433	37611433	33	1.052	71.342	3.654	0	480.397	1	0.500	1	-10921639	119.505	117	108	151	11592	7.034	0.487	0.009	0.310
255	ID37801756	37801756	34	1.289	133.897	1.857	0	0.000	0	0.500	1	-10921639	124.144	123	112	157	12042	7.697	1.900	0.010	0.320
256	ID37610659	37610659	34	1.045	134.735	2.356	0	480.397	1	0.500	1	-10921639	122.784	122	111	139	11910	5.594	0.489	0.010	0.440
257	ID37881634	37881634	34	1.175	134.921	1.667	0	960.794	2	0.500	1	-10921639	121.639	121	111	153	11799	6.750	1.900	0.015	0.550
258	ID37615198	37615198	34	0.983	135.016	1.680	0	1441.191	3	0.500	1	-10921639	121.402	121	111	144	11776	5.435	1.400	0.010	0.442
259	ID37911326	37911326	35	1.156	88.345	140.743	0	0.000	0	0.500	1	-10921639	121.536	121	109	153	11789	6.529	1.900	0.011	0.416
260	ID37709343	37709343	35	1.286	89.239	140.363	0	480.397	1	0.500	1	-10921639	122.041	122	111	146	11838	6.435	0.709	0.017	0.634
261	ID37963538	37963538	35	0.887	89.842	139.970	0	960.794	2	0.500	1	-10921639	120.227	119	110	144	11662	6.224	1.780	0.006	0.237
262	ID37676248	37676248	35	1.191	89.514	140.474	0	1441.191	3	0.500	1	-10921639	123.577	124	110	147	11987	6.858	0.969	0.016	0.568
263	ID37782095	37782095	35	1.236	90.815	140.754	0	1921.588	4	0.500	1	-10921639	120.423	121	110	155	11681	6.349	1.596	0.018	0.657
264	ID37733291	37733291	35	1.226	89.158	140.723	0	2401.985	5	0.500	1	-10921639	121.887	121	111	138	11823	5.809	1.795	0.010	0.405
265	ID37733607	37733607	35	1.265	91.038	140.827	0	2401.985	5	0.500	1	-10921639	121.062	121	109	136	11743	5.771	1.789	0.016	0.642
266	ID37916910	37916910	35	1.614	87.500	140.548	0	2882.382	6	0.500	1	-10921639	122.876	120	112	152	11919	7.240	0.471	0.013	0.452
267	ID37922078	37922078	35	1.146	91.498	142.091	0	2882.382	6	0.500	1	-10921639	120.330	120	112	140	11672	5.843	1.900	0.011	0.429
268	ID37714170	37714170	35	1.737	86.034	139.431	0	3362.779	7	0.500	1	-10921639	122.340	120	111	148	11867	8.017	0.484	0.016	0.470
269	ID37707470	37707470	35	1.495	91.433	142.165	0	3362.779	7	0.500	1	-10921639	121.062	119	111	150	11743	6.722	1.792	0.016	0.562
270	ID37869170	37869170	35	1.698	91.965	141.879	0	3843.176	8	0.500	1	-10921639	121.515	119	110	148	11787	8.275	0.488	0.022	0.623
271	ID37866360	37866360	35	2.080	85.608	140.364	0	3843.176	8	0.500	1	-10921639	122.474	120	112	161	11880	9.415	0.472	0.022	0.559
272	ID37868937	37868937	35	1.187	85.944	140.834	0	4323.573	9	0.500	1	-10921639	121.227	120	110	140	11759	6.096	0.474	0.009	0.348
273	ID37931294	37931294	36	1.492	187.976	169.440	0	0.000	0	0.500	1	-10921639	121.113	120	111	141	11748	7.090	1.900	0.012	0.404
274	ID37742082	37742082	36	1.505	188.442	168.457	0	480.397	1	0.500	1	-10921639	121.907	120	111	141	11825	6.445	1.839	0.011	0.396
275	ID37967588	37967588	36	1.219	188.110	169.165	0	960.794	2	0.500	1	-10921639	121.454	120	112	141	11781	6.468	1.787	0.013	0.484
276	ID37819132	37819132	36	1.052	187.723	169.398	0	1921.588	4	0.500	1	-10921639	121.567	121	109	141	11792	6.062	1.900	0.007	0.270
277	ID37751312	37751312	36	1.051	187.220	169.638	0	2401.985	5	0.500	1	-10921639	121.649	122	112	140	11800	5.481	1.591	0.010	0.431
278	ID37948002	37948002	36	1.186	187.358	169.862	0	2882.382	6	0.500	1	-10921639	122.649	122	112	140	11897	5.845	0.497	0.014	0.582
279	ID37731161	37731161	36	1.160	187.394	169.826	0	3362.779	7	0.500	1	-10921639	123.546	123	112	141	11984	5.528	1.793	0.006	0.280
280	ID37882370	37882370	36	1.214	187.753	169.652	0	3843.176	8	0.500	1	-10921639	121.526	121	111	147	11788	6.210	0.489	0.010	0.401
281	ID37880991	37880991	36	1.028	186.734	169.984	0	4323.573	9	0.500	1	-10921639	122.320	122	109	138	11865	5.654	0.718	0.005	0.208
282	ID37942300	37942300	37	1.542	77.400	208.157	0	0.000	0	0.500	1	-10921639	124.237	124	110	142	12051	6.920	0.494	0.015	0.540
283	ID37778077	37778077	37	0.976	77.708	207.988	0	480.397	1	0.500	1	-10921639	121.144	120	110	140	11751	6.154	1.774	0.008	0.331
284	ID37974677	37974677	37	1.208	77.547	207.978	0	960.794	2	0.500	1	-10921639	120.464	118	111	148	11685	6.462	1.900	0.011	0.392
285	ID37916701	37916701	38	1.461	85.939	147.964	0	0.000	0	0.500	1	-10921639	124.845	124	112	144	12110	6.886	1.900	0.016	0.558
286	ID37725445	37725445	38	0.975	86.716	148.225	0	480.397	1	0.500	1	-10921639	121.536	120	113	137	11789	5.642	1.788	0.005	0.215
287	ID37930788	37930788	39	0.899	48.800	171.257	0	0.000	0	0.500	1	-10921639	121.155	120	111	138	11752	5.415	1.595	0.009	0.391
288	ID37742714	37742714	39	1.153	49.586	170.991	0	480.397	1	0.500	1	-10921639	121.526	121	109	144	11788	6.969	1.900	0.014	0.480
289	ID37968400	37968400	39	0.955	49.128	171.035	0	960.794	2	0.500	1	-10921639	120.320	120	111	141	11671	5.933	1.596	0.006	0.228
290	ID37967708	37967708	39	0.954	49.571	169.949	0	960.794	2	0.500	1	-10921639	120.567	119	109	142	11695	6.242	0.708	0.008	0.308
291	ID37697967	37697967	39	0.888	50.723	170.849	0	1441.191	3	0.500	1	-10921639	120.093	119	111	135	11649	5.393	1.783	0.008	0.362
292	ID37697422	37697422	39	1.408	49.382	169.990	0	1441.191	3	0.500	1	-10921639	121.876	120	111	148	11822	6.786	0.717	0.017	0.598
293	ID37818699	37818699	39	1.316	51.999	172.216	0	1921.588	4	0.500	1	-10921639	119.320	119	106	147	11574	6.928	1.900	0.010	0.330
294	ID37817483	37817483	39	1.241	49.027	169.175	0	1921.588	4	0.500	1	-10921639	121.227	120	110	151	11759	6.962	1.656	0.015	0.515
295	ID37756920	37756920	39	1.194	52.840	172.537	0	2401.985	5	0.500	1	-10921639	119.567	119	110	132	11598	5.242	0.482	0.014	0.626
296	ID37751261	37751261	39	1.556	47.255	169.689	0	2401.985	5	0.500	1	-10921639	121.031	120	110	151	11740	6.856	1.809	0.011	0.374
297	ID37931784	37931784	39	1.691	52.857	172.543	0	2882.382	6	0.500	1	-10921639	120.144	118	107	141	11654	7.719	0.486	0.017	0.532
298	ID37947770	37947770	39	1.817	47.450	169.588	0	2882.382	6	0.500	1	-10921639	121.918	120	111	159	11826	7.918	0.481	0.021	0.644
299	ID37735478	37735478	39	1.502	51.517	171.638	0	3362.779	7	0.500	1	-10921639	121.773	121	109	147	11812	7.187	0.482	0.015	0.485
300	ID37730820	37730820	39	1.995	48.077	169.518	0	3362.779	7	0.500	1	-10921639	122.299	121	110	159	11863	7.999	0.488	0.019	0.569
301	ID37890827	37890827	39	1.363	52.187	172.115	0	3843.176	8	0.500	1	-10921639	120.887	120	110	140	11726	5.967	1.840	0.018	0.717
302	ID37882608	37882608	39	0.915	48.963	170.074	0	3843.176	8	0.500	1	-10921639	120.938	121	110	140	11731	5.269	1.900	0.012	0.558
303	ID37890085	37890085	40	1.335	212.501	105.388	0	0.000	0	0.500	1	-10921639	119.278	118	108	143	11570	6.373	1.900	0.008	0.307
304	ID37674733	37674733	40	1.038	213.665	104.961	0	480.397	1	0.500	1	-10921639	117.948	117	105	153	11441	6.807	1.590	0.009	0.302
305	ID37933099	37933099	41	1.105	58.421	174.294	0	0.000	0	0.500	1	-10921639	122.402	122	108	142	11873	6.471	1.900	0.012	0.465
306	ID37744917	37744917	41	1.146	59.361	173.946	0	480.397	1	0.500	1	-10921639	120.835	120	110	144	11721	6.519	0.486	0.013	0.479
307	ID37969099	37969099	41	1.380	59.880	173.826	0	960.794	2	0.500	1	-10921639	121.649	120	109	146	11800	6.272	1.900	0.017	0.645
308	ID37700901	37700901	41	1.612	59.623	173.166	0	1441.191	3	0.500	1	-10921639	121.113	120	110	146	11748	7.663	0.484	0.015	0.467
309	ID37813987	37813987	41	1.381	58.957	173.356	0	1921.588	4	0.500	1	-10921639	121.825	121	110	144	11817	6.627	0.493	0.015	0.534
310	ID37895977	37895977	42	1.805	25.862	110.062	0	0.000	0	0.500	1	-10921639	122.763	122	110	141	11908	7.052	0.480	0.016	0.559
311	ID37676104	37676104	42	1.658	26.273	110.069	0	480.397	1	0.500	1	-10921639	121.526	119	111	150	11788	7.092	1.804	0.015	0.497
312	ID37955693	37955693	42	1.330	26.571	109.595	0	960.794	2	0.500	1	-10921639	121.062	121	109	139	11743	6.108	1.782	0.021	0.817
313	ID37659824	37659824	42	1.149	27.048	108.761	0	1441.191	3	0.500	1	-10921639	120.753	121	109	132	11713	5.358	1.799	0.016	0.707
314	ID37756917	37756917	42	1.143	26.815	108.252	0	1921.588	4	0.500	1	-10921639	120.041	120	111	141	11644	5.317	0.704	0.011	0.512
315	ID37711009	37711009	42	1.246	26.739	108.297	0	2401.985	5	0.500	1	-10921639	120.753	119	112	134	11713	5.640	1.900	0.019	0.798
316	ID37886627	37886627	42	1.362	26.415	108.370	0	2882.382	6	0.500	1	-10921639	121.474	121	110	159	11783	6.701	0.705	0.016	0.561
317	ID37688198	37688198	42	1.715	27.240	108.512	0	3362.779	7	0.500	1	-10921639	122.784	121	109	142	11910	7.023	1.900	0.017	0.569
318	ID37845675	37845675	42	1.807	26.685	109.078	0	3843.176	8	0.500	1	-10921639	122.546	121	108	148	11887	7.250	0.703	0.016	0.519
319	ID37834286	37834286	43	1.054	74.506	40.293	0	0.000	0	0.500	1	-10921639	121.887	121	112	142	11823	5.816	1.900	0.013	0.552
320	ID37627269	37627269	43	1.340	74.416	40.904	0	480.397	1	0.500	1	-10921639	120.464	119	110	158	11685	7.474	0.478	0.014	0.459
321	ID37917608	37917608	43	1.237	73.727	40.337	0	960.794	2	0.500	1	-10921639	120.845	120	111	140	11722	6.212	1.900	0.009	0.360
322	ID37629767	37629767	43	1.352	73.127	40.250	0	1441.191	3	0.500	1	-10921639	121.856	120	110	144	11820	6.592	1.812	0.012	0.455
323	ID37717481	37717481	43	1.003	72.347	40.881	0	1921.588	4	0.500	1	-10921639	119.691	119	111	137	11610	5.306	1.900	0.008	0.359
324	ID37665898	37665898	43	1.440	73.767	39.373	0	2401.985	5	0.500	1	-10921639	121.474	120	112	153	11783	7.033	0.721	0.011	0.392
325	ID37637682	37637682	43	1.025	74.398	40.137	0	3362.779	7	0.500	1	-10921639	121.856	121	111	142	11820	5.739	0.495	0.010	0.429
326	ID37794600	37794600	43	1.453	74.306	40.310	0	3843.176	8	0.500	1	-10921639	122.742	122	111	144	11906	6.328	0.485	0.016	0.614
327	ID37799754	37799754	43	1.501	74.382	40.646	0	4323.573	9	0.500	1	-10921639	122.763	122	112	147	11908	6.849	0.487	0.016	0.570
328	ID37921335	37921335	44	1.228	38.225	153.360	0	0.000	0	0.500	1	-10921639	121.495	120	110	148	11785	6.708	1.682	0.013	0.452
329	ID37722259	37722259	44	1.158	38.732	153.367	0	480.397	1	0.500	1	-10921639	119.876	118	108	137	11628	5.899	1.601	0.010	0.385
330	ID37965532	37965532	44	1.004	38.807	153.778	0	960.794	2	0.500	1	-10921639	119.371	118	111	135	11579	5.345	1.774	0.010	0.464
331	ID37831478	37831478	45	1.872	118.946	37.313	0	0.000	0	0.500	1	-10921639	124.247	123	112	148	12052	7.595	1.900	0.018	0.569
332	ID37626256	37626256	45	1.367	119.707	36.585	0	480.397	1	0.500	1	-10921639	122.155	121	109	139	11849	6.033	1.791	0.014	0.576
333	ID37910974	37910974	45	1.473	120.389	35.991	0	960.794	2	0.500	1	-10921639	123.794	122	112	153	12008	7.739	0.494	0.015	0.481
334	ID37628815	37628815	45	1.903	120.326	37.322	0	1441.191	3	0.500	1	-10921639	123.598	121	111	157	11989	8.962	0.483	0.018	0.485
335	ID37717206	37717206	45	1.867	120.112	36.990	0	1921.588	4	0.500	1	-10921639	122.691	121	111	152	11901	8.432	0.475	0.018	0.510
336	ID37661786	37661786	45	1.150	120.589	37.297	0	2401.985	5	0.500	1	-10921639	122.361	122	111	142	11869	6.088	1.900	0.008	0.323
337	ID37816710	37816710	45	1.061	119.219	37.318	0	2882.382	6	0.500	1	-10921639	122.505	122	112	145	11883	5.663	1.824	0.009	0.386
338	ID37632021	37632021	45	1.312	119.635	37.455	0	3362.779	7	0.500	1	-10921639	123.010	122	112	152	11932	6.006	1.900	0.009	0.370
339	ID37831227	37831227	46	1.685	74.566	37.041	0	0.000	0	0.500	1	-10921639	122.701	120	111	154	11902	7.754	1.900	0.018	0.569
340	ID37626726	37626726	46	1.154	75.433	37.267	0	480.397	1	0.500	1	-10921639	122.732	121	112	142	11905	6.207	1.812	0.014	0.538
341	ID37914755	37914755	46	1.218	75.803	37.059	0	960.794	2	0.500	1	-10921639	123.113	122	110	150	11942	5.779	1.900	0.006	0.242
342	ID37628552	37628552	46	1.368	75.982	36.946	0	1441.191	3	0.500	1	-10921639	123.515	123	114	142	11981	5.815	0.706	0.014	0.574
343	ID37716781	37716781	46	1.393	76.313	36.720	0	1921.588	4	0.500	1	-10921639	121.443	120	110	143	11780	6.592	1.798	0.013	0.484
344	ID37661844	37661844	46	1.492	76.611	36.993	0	2401.985	5	0.500	1	-10921639	123.464	123	112	141	11976	6.066	0.710	0.012	0.495
345	ID37816809	37816809	46	1.278	76.292	36.930	0	2882.382	6	0.500	1	-10921639	123.278	122	113	144	11958	5.800	0.494	0.009	0.362
346	ID37632070	37632070	46	1.460	75.674	37.388	0	3362.779	7	0.500	1	-10921639	123.124	122	111	143	11943	6.649	0.486	0.015	0.556
347	ID37785316	37785316	46	1.134	75.845	37.206	0	3843.176	8	0.500	1	-10921639	122.227	121	112	138	11856	5.556	1.396	0.014	0.613
348	ID37796630	37796630	46	1.113	75.737	37.336	0	4323.573	9	0.500	1	-10921639	121.557	121	111	136	11791	5.356	1.900	0.010	0.471
349	ID37907260	37907260	47	1.141	192.503	128.968	0	0.000	0	0.500	1	-10921639	120.361	119	110	141	11675	5.777	0.706	0.014	0.576
350	ID37703190	37703190	47	0.954	192.645	129.056	0	480.397	1	0.500	1	-10921639	119.763	119	110	140	11617	5.838	1.900	0.014	0.559
351	ID37921986	37921986	48	1.716	47.006	136.041	0	0.000	0	0.500	1	-10921639	120.866	119	108	145	11724	7.643	1.599	0.018	0.557
352	ID37713630	37713630	48	1.519	48.406	136.041	0	480.397	1	0.500	1	-10921639	119.464	117	110	153	11588	8.061	1.728	0.008	0.235
353	ID37962764	37962764	48	1.431	48.089	136.666	0	960.794	2	0.500	1	-10921639	120.124	119	110	141	11652	6.355	1.595	0.017	0.643
354	ID37674404	37674404	48	1.767	47.871	135.670	0	1441.191	3	0.500	1	-10921639	121.598	120	111	150	11795	7.490	0.706	0.018	0.571
355	ID37794391	37794391	48	1.423	47.627	135.231	0	1921.588	4	0.500	1	-10921639	120.619	119	111	140	11700	6.152	1.900	0.018	0.681
356	ID37727701	37727701	48	1.054	48.405	134.830	0	2401.985	5	0.500	1	-10921639	119.897	119	109	138	11630	5.314	0.490	0.009	0.391
357	ID37700638	37700638	48	1.187	48.592	134.954	0	3362.779	7	0.500	1	-10921639	120.711	120	111	137	11709	5.113	0.703	0.006	0.300
358	ID37860751	37860751	48	1.627	48.518	135.154	0	3843.176	8	0.500	1	-10921639	121.588	120	109	144	11794	7.119	0.707	0.016	0.544
359	ID37860363	37860363	48	1.145	48.658	135.132	0	4323.573	9	0.500	1	-10921639	119.165	118	108	136	11559	5.893	0.710	0.011	0.458
360	ID37824194	37824194	49	1.271	137.949	29.456	0	0.000	0	0.500	1	-10921639	120.588	119	109	136	11697	6.096	1.900	0.009	0.348
361	ID37617867	37617867	49	1.021	138.233	29.409	0	480.397	1	0.500	1	-10921639	120.515	120	111	136	11690	5.640	1.807	0.015	0.636
362	ID37908555	37908555	49	0.999	135.875	29.649	0	960.794	2	0.500	1	-10921639	121.969	121	112	153	11831	6.457	1.900	0.007	0.250
363	ID37836226	37836226	50	0.934	134.429	40.680	0	0.000	0	0.500	1	-10921639	121.309	121	108	141	11767	5.251	1.394	0.008	0.365
364	ID37626991	37626991	50	1.119	135.681	40.467	0	480.397	1	0.500	1	-10921639	122.526	121	110	146	11885	6.389	1.769	0.006	0.222
365	ID37915329	37915329	51	1.101	198.779	138.420	0	0.000	0	0.500	1	-10921639	121.907	122	110	136	11825	5.708	1.403	0.012	0.503
366	ID37711940	37711940	51	0.974	199.319	138.050	0	480.397	1	0.500	1	-10921639	122.206	122	106	141	11854	5.502	1.684	0.007	0.291
367	ID37962519	37962519	51	0.888	199.565	137.681	0	960.794	2	0.500	1	-10921639	120.237	120	110	139	11663	5.711	1.685	0.010	0.410
368	ID37674883	37674883	51	1.061	199.407	136.643	0	1441.191	3	0.500	1	-10921639	119.423	119	109	143	11584	6.314	1.900	0.010	0.384
369	ID37793706	37793706	51	1.291	198.006	134.581	0	1921.588	4	0.500	1	-10921639	120.392	119	111	147	11678	6.296	0.709	0.013	0.499
370	ID37932484	37932484	52	1.097	102.704	172.329	0	0.000	0	0.500	1	-10921639	122.804	123	109	157	11912	6.464	1.805	0.009	0.323
371	ID37748229	37748229	52	1.308	103.129	172.605	0	480.397	1	0.500	1	-10921639	122.423	121	110	141	11875	6.323	1.900	0.015	0.558
372	ID37968107	37968107	52	1.488	102.943	172.432	0	960.794	2	0.500	1	-10921639	122.577	122	111	144	11890	6.568	1.900	0.018	0.675
373	ID37700570	37700570	52	0.993	103.300	172.534	0	1441.191	3	0.500	1	-10921639	122.639	122	113	137	11896	5.576	1.595	0.010	0.416
374	ID37813471	37813471	52	1.625	103.317	172.565	0	1921.588	4	0.500	1	-10921639	124.722	123	112	155	12098	7.544	0.489	0.017	0.555
375	ID37755671	37755671	52	1.264	103.394	171.974	0	2401.985	5	0.500	1	-10921639	123.289	123	108	144	11959	6.785	1.790	0.010	0.358
376	ID37931723	37931723	52	1.361	102.690	172.436	0	2882.382	6	0.500	1	-10921639	123.505	122	112	153	11980	7.266	1.608	0.013	0.423
377	ID37932019	37932019	52	0.999	102.945	173.105	0	2882.382	6	0.500	1	-10921639	122.381	123	111	139	11871	6.226	0.708	0.013	0.503
378	ID37737715	37737715	52	1.040	103.160	173.136	0	3362.779	7	0.500	1	-10921639	121.093	121	111	140	11746	6.149	1.809	0.009	0.369
379	ID37736960	37736960	52	1.151	103.136	172.181	0	3362.779	7	0.500	1	-10921639	121.794	121	109	143	11814	5.946	0.480	0.012	0.500
380	ID37890786	37890786	52	1.168	102.607	172.041	0	3843.176	8	0.500	1	-10921639	120.134	119	111	148	11653	6.147	1.900	0.014	0.521
381	ID37889414	37889414	52	1.011	103.022	173.320	0	3843.176	8	0.500	1	-10921639	119.773	118	109	139	11618	5.586	1.900	0.013	0.535
382	ID37881928	37881928	52	1.017	102.141	171.457	0	4323.573	9	0.500	1	-10921639	119.546	119	109	136	11596	5.313	0.713	0.013	0.594
383	ID37883497	37883497	52	1.710	103.345	175.523	0	4323.573	9	0.500	1	-10921639	121.526	120	110	149	11788	6.936	0.707	0.019	0.653
384	ID37880010	37880010	53	1.632	28.607	91.442	0	0.000	0	0.500	1	-10921639	121.979	121	112	139	11832	6.043	1.818	0.016	0.635
385	ID37670947	37670947	53	1.352	28.831	91.409	0	480.397	1	0.500	1	-10921639	121.804	121	111	149	11815	6.234	1.808	0.011	0.433
386	ID37950871	37950871	53	1.198	29.500	91.290	0	960.794	2	0.500	1	-10921639	120.433	120	109	137	11682	5.655	1.597	0.010	0.411
387	ID37850829	37850829	54	1.186	64.336	59.704	0	0.000	0	0.500	1	-10921639	121.402	121	112	141	11776	6.127	0.471	0.009	0.369
388	ID37639504	37639504	54	1.365	65.693	58.696	0	480.397	1	0.500	1	-10921639	121.979	120	111	154	11832	7.992	1.900	0.016	0.467
389	ID37931878	37931878	54	1.653	64.721	59.542	0	960.794	2	0.500	1	-10921639	122.299	121	107	143	11863	6.949	0.703	0.018	0.629
390	ID37636858	37636858	54	1.096	65.912	58.572	0	1441.191	3	0.500	1	-10921639	122.959	122	110	143	11927	6.776	0.709	0.013	0.479
391	ID37737076	37737076	54	1.738	64.253	60.250	0	1921.588	4	0.500	1	-10921639	122.320	120	111	150	11865	7.905	1.900	0.018	0.560
392	ID37678298	37678298	54	2.043	63.005	62.065	0	2401.985	5	0.500	1	-10921639	121.990	120	110	169	11833	8.898	0.477	0.020	0.541
393	ID37840765	37840765	54	1.601	62.674	61.868	0	2882.382	6	0.500	1	-10921639	122.361	121	108	141	11869	7.101	0.490	0.014	0.483
394	ID37645714	37645714	54	1.459	63.365	62.125	0	3362.779	7	0.500	1	-10921639	120.299	120	109	140	11669	6.615	0.482	0.017	0.596
395	ID37809238	37809238	54	1.200	63.494	62.572	0	3843.176	8	0.500	1	-10921639	119.773	119	109	141	11618	6.165	1.633	0.011	0.421
396	ID37805006	37805006	55	1.065	83.404	14.590	0	0.000	0	0.500	1	-10921639	121.742	120	110	145	11809	6.092	1.900	0.010	0.409
397	ID37611220	37611220	55	0.995	83.549	13.994	0	480.397	1	0.500	1	-10921639	121.103	120	110	148	11747	5.476	1.825	0.010	0.456
398	ID37892938	37892938	55	1.041	81.229	13.010	0	960.794	2	0.500	1	-10921639	122.505	122	113	144	11883	5.232	1.900	0.010	0.451
399	ID37619615	37619615	55	1.150	81.602	13.514	0	1441.191	3	0.500	1	-10921639	123.402	123	111	138	11970	5.057	1.406	0.010	0.468
400	ID37698430	37698430	55	1.301	81.908	13.757	0	1921.588	4	0.500	1	-10921639	122.856	122	113	138	11917	5.939	1.595	0.017	0.673
401	ID37653053	37653053	55	1.307	81.457	14.272	0	2401.985	5	0.500	1	-10921639	123.072	122	109	147	11938	6.547	0.710	0.017	0.627
402	ID37790159	37790159	55	1.135	81.708	14.057	0	2882.382	6	0.500	1	-10921639	123.711	123	112	146	12000	6.591	1.583	0.007	0.270
403	ID37619880	37619880	55	1.114	81.663	13.675	0	3362.779	7	0.500	1	-10921639	122.000	121	109	140	11834	6.922	1.814	0.011	0.392
404	ID37623831	37623831	55	1.286	82.008	14.390	0	3362.779	7	0.500	1	-10921639	123.392	122	112	145	11969	6.708	0.480	0.010	0.351
405	ID37771824	37771824	55	1.252	82.261	14.647	0	3843.176	8	0.500	1	-10921639	121.948	121	110	151	11829	6.162	1.783	0.014	0.542
406	ID37783675	37783675	55	1.140	81.561	14.810	0	4323.573	9	0.500	1	-10921639	121.186	120	110	142	11755	6.428	1.900	0.013	0.468
407	ID37862094	37862094	56	2.013	113.753	68.279	0	0.000	0	0.500	1	-10921639	123.361	122	111	160	11966	8.997	0.473	0.021	0.568
408	ID37640477	37640477	56	1.424	114.467	68.236	0	480.397	1	0.500	1	-10921639	123.052	122	111	146	11936	6.662	1.600	0.016	0.565
409	ID37938669	37938669	56	1.384	114.695	67.719	0	960.794	2	0.500	1	-10921639	123.598	122	112	147	11989	6.737	0.493	0.011	0.386
410	ID37640556	37640556	56	1.350	115.115	68.212	0	1441.191	3	0.500	1	-10921639	123.010	121	113	144	11932	6.797	1.900	0.011	0.401
411	ID37733025	37733025	56	1.018	114.967	68.153	0	1921.588	4	0.500	1	-10921639	122.165	121	111	160	11850	6.490	0.495	0.013	0.477
412	ID37685323	37685323	56	1.043	114.735	68.087	0	2401.985	5	0.500	1	-10921639	122.845	123	111	144	11916	5.403	1.900	0.010	0.434
413	ID37943510	37943510	57	1.666	186.209	202.004	0	0.000	0	0.500	1	-10921639	127.247	126	114	150	12343	7.293	0.494	0.018	0.607
414	ID37767123	37767123	57	1.265	187.184	201.936	0	480.397	1	0.500	1	-10921639	125.113	125	113	142	12136	6.220	0.714	0.013	0.518
415	ID37973668	37973668	57	1.946	187.019	201.719	0	960.794	2	0.500	1	-10921639	126.629	125	110	151	12283	8.002	0.488	0.021	0.645
416	ID37720508	37720508	57	1.668	187.610	202.093	0	1441.191	3	0.500	1	-10921639	125.155	124	111	155	12140	7.981	1.900	0.012	0.364
417	ID37845255	37845255	57	1.126	187.769	201.825	0	1921.588	4	0.500	1	-10921639	122.629	122	112	143	11895	6.200	1.593	0.012	0.464
418	ID37778982	37778982	57	0.920	187.235	201.903	0	2401.985	5	0.500	1	-10921639	122.979	121	111	146	11929	6.554	0.709	0.013	0.487
419	ID37953152	37953152	57	1.150	187.295	202.236	0	2882.382	6	0.500	1	-10921639	121.742	120	109	144	11809	6.778	1.900	0.013	0.478
420	ID37910058	37910058	57	1.156	186.220	201.764	0	3843.176	8	0.500	1	-10921639	121.887	121	107	142	11823	6.802	0.709	0.015	0.535
421	ID37906842	37906842	57	1.567	185.559	204.392	0	4323.573	9	0.500	1	-10921639	122.299	121	110	145	11863	6.880	0.487	0.013	0.459
422	ID37871316	37871316	58	1.176	176.791	80.185	0	0.000	0	0.500	1	-10921639	120.423	119	107	148	11681	6.530	1.842	0.013	0.459
423	ID37649400	37649400	58	1.070	177.433	80.163	0	480.397	1	0.500	1	-10921639	121.124	120	109	136	11749	4.986	1.900	0.010	0.469
424	ID37946597	37946597	58	0.969	178.614	79.448	0	960.794	2	0.500	1	-10921639	119.495	119	107	130	11591	4.772	1.811	0.008	0.381
425	ID37646111	37646111	58	1.043	177.873	80.442	0	1441.191	3	0.500	1	-10921639	119.546	118	110	141	11596	5.976	1.802	0.011	0.426
426	ID37741466	37741466	58	1.008	176.993	81.061	0	1921.588	4	0.500	1	-10921639	118.278	117	108	141	11473	6.108	1.900	0.015	0.584
427	ID37693104	37693104	58	0.939	176.674	81.730	0	2401.985	5	0.500	1	-10921639	117.567	117	109	139	11404	5.228	1.900	0.012	0.539
428	ID37866608	37866608	58	0.997	177.492	81.377	0	2882.382	6	0.500	1	-10921639	118.340	117	109	149	11479	6.240	0.700	0.012	0.438
429	ID37659431	37659431	58	0.915	178.116	80.237	0	3362.779	7	0.500	1	-10921639	118.557	117	108	134	11500	5.190	1.589	0.007	0.327
430	ID37902548	37902548	59	0.921	82.065	126.164	0	0.000	0	0.500	1	-10921639	119.732	120	109	137	11614	5.465	1.405	0.006	0.265
431	ID37694930	37694930	59	0.938	81.490	122.449	0	480.397	1	0.500	1	-10921639	119.454	119	108	139	11587	6.207	1.900	0.014	0.545
432	ID37960318	37960318	59	1.066	81.291	122.046	0	960.794	2	0.500	1	-10921639	119.835	119	109	138	11624	6.159	0.492	0.009	0.362
433	ID37667301	37667301	59	0.890	81.583	121.819	0	1441.191	3	0.500	1	-10921639	119.691	120	110	134	11610	4.978	1.417	0.012	0.562
434	ID37764685	37764685	59	1.075	81.260	121.818	0	1921.588	4	0.500	1	-10921639	119.897	119	109	139	11630	5.689	1.900	0.012	0.497
435	ID37718212	37718212	59	1.263	80.932	122.102	0	2401.985	5	0.500	1	-10921639	121.144	120	111	146	11751	6.141	1.799	0.013	0.506
436	ID37901965	37901965	59	1.076	80.728	122.611	0	2882.382	6	0.500	1	-10921639	120.402	120	112	136	11679	5.355	1.605	0.007	0.328
437	ID37691759	37691759	59	1.240	81.037	122.295	0	3362.779	7	0.500	1	-10921639	119.990	119	111	151	11639	6.697	1.807	0.012	0.436
438	ID37862102	37862102	60	1.089	116.460	68.229	0	0.000	0	0.500	1	-10921639	123.196	122	111	147	11950	6.394	1.588	0.007	0.276
439	ID37640233	37640233	60	0.886	116.645	67.905	0	480.397	1	0.500	1	-10921639	123.113	123	111	141	11942	6.050	1.622	0.006	0.231
440	ID37937452	37937452	60	1.506	116.915	65.747	0	960.794	2	0.500	1	-10921639	121.103	120	108	145	11747	6.510	0.487	0.013	0.466
441	ID37639982	37639982	60	1.790	117.016	66.439	0	1441.191	3	0.500	1	-10921639	123.474	122	111	157	11977	8.283	1.599	0.014	0.411
442	ID37734911	37734911	60	1.829	117.093	65.927	0	1921.588	4	0.500	1	-10921639	123.443	122	110	143	11974	7.427	0.490	0.018	0.574
443	ID37680806	37680806	60	1.686	117.054	66.498	0	2401.985	5	0.500	1	-10921639	122.722	121	111	163	11904	8.323	1.675	0.016	0.464
444	ID37846043	37846043	60	1.816	117.354	68.035	0	2882.382	6	0.500	1	-10921639	123.093	121	110	156	11940	8.850	0.482	0.016	0.430
445	ID37656977	37656977	60	1.357	117.838	68.562	0	3362.779	7	0.500	1	-10921639	121.320	120	111	144	11768	6.296	1.900	0.007	0.249
446	ID37812977	37812977	60	1.378	118.162	68.010	0	3843.176	8	0.500	1	-10921639	121.464	120	110	146	11782	6.453	0.488	0.015	0.570
447	ID37821265	37821265	60	1.232	117.446	67.998	0	4323.573	9	0.500	1	-10921639	121.443	120	111	151	11780	6.942	1.900	0.010	0.331
448	ID37877208	37877208	61	1.395	57.304	86.402	0	0.000	0	0.500	1	-10921639	123.144	123	112	146	11945	6.403	1.900	0.020	0.742
449	ID37655617	37655617	61	1.444	58.255	86.907	0	480.397	1	0.500	1	-10921639	124.639	124	113	141	12090	6.284	1.637	0.015	0.585
450	ID37949590	37949590	61	0.892	57.090	86.332	0	960.794	2	0.500	1	-10921639	122.443	122	112	138	11877	4.776	1.817	0.007	0.377
451	ID37648152	37648152	61	1.663	57.314	85.789	0	1441.191	3	0.500	1	-10921639	123.392	122	112	143	11969	6.891	0.491	0.019	0.679
452	ID37745710	37745710	61	1.151	57.271	85.501	0	1921.588	4	0.500	1	-10921639	121.155	121	109	135	11752	5.108	1.900	0.013	0.625
453	ID37692358	37692358	61	1.218	57.517	85.835	0	2401.985	5	0.500	1	-10921639	123.000	122	112	168	11931	7.070	1.211	0.006	0.217
454	ID37865171	37865171	61	1.498	57.437	85.771	0	2882.382	6	0.500	1	-10921639	123.639	122	113	157	11993	6.604	1.408	0.011	0.405
455	ID37670859	37670859	61	1.445	57.643	85.969	0	3362.779	7	0.500	1	-10921639	124.299	123	112	140	12057	5.953	0.709	0.013	0.518
456	ID37826462	37826462	61	1.404	57.699	86.127	0	3843.176	8	0.500	1	-10921639	123.536	124	111	142	11983	5.932	1.900	0.012	0.500
457	ID37836574	37836574	61	1.683	57.556	86.331	0	4323.573	9	0.500	1	-10921639	123.258	122	111	157	11956	7.684	1.900	0.021	0.661
458	ID37882595	37882595	62	1.421	174.809	98.087	0	0.000	0	0.500	1	-10921639	122.588	122	109	148	11891	6.204	0.710	0.012	0.486
459	ID37672589	37672589	62	1.290	175.286	97.357	0	480.397	1	0.500	1	-10921639	120.701	120	109	144	11708	6.402	0.479	0.014	0.506
460	ID37951345	37951345	62	1.152	174.947	97.155	0	960.794	2	0.500	1	-10921639	119.639	119	107	143	11605	6.457	0.491	0.004	0.160
461	ID37653606	37653606	62	1.584	174.978	96.845	0	1441.191	3	0.500	1	-10921639	120.856	119	108	149	11723	7.557	0.488	0.016	0.506
462	ID37754290	37754290	62	1.486	174.097	95.964	0	1921.588	4	0.500	1	-10921639	119.598	118	109	152	11601	6.837	0.473	0.012	0.427
463	ID37702637	37702637	62	1.444	174.425	96.259	0	2401.985	5	0.500	1	-10921639	120.320	119	110	137	11671	6.199	0.491	0.011	0.420
464	ID37877865	37877865	62	1.098	173.979	96.997	0	2882.382	6	0.500	1	-10921639	121.062	121	110	139	11743	6.245	1.582	0.004	0.170
465	ID37672180	37672180	62	0.958	175.086	97.063	0	3362.779	7	0.500	1	-10921639	118.876	118	108	141	11531	5.672	1.801	0.015	0.614
466	ID37817318	37817318	63	3.137	93.682	22.639	0	0.000	0	0.500	1	-10921639	129.835	128	114	156	12594	10.511	0.489	0.031	0.739
467	ID37616493	37616493	63	3.283	94.327	22.376	0	480.397	1	0.500	1	-10921639	133.959	132	117	166	12994	10.640	0.712	0.032	0.772
468	ID37901454	37901454	63	3.692	94.405	22.182	0	960.794	2	0.500	1	-10921639	136.165	134	113	172	13208	12.045	0.717	0.037	0.808
469	ID37623103	37623103	63	4.659	94.580	22.199	0	1441.191	3	0.500	1	-10921639	140.093	138	114	182	13589	13.445	0.488	0.045	0.894
470	ID37700866	37700866	63	4.595	94.499	22.115	0	1921.588	4	0.500	1	-10921639	140.722	139	118	179	13650	13.652	0.488	0.039	0.780
471	ID37656866	37656866	63	4.310	94.434	22.209	0	2401.985	5	0.500	1	-10921639	140.392	139	114	178	13618	13.181	0.487	0.040	0.826
472	ID37802416	37802416	63	4.198	94.313	22.349	0	2882.382	6	0.500	1	-10921639	142.887	141	122	174	13860	11.777	1.801	0.033	0.779
473	ID37628219	37628219	63	4.889	94.415	22.449	0	3362.779	7	0.500	1	-10921639	142.361	138	121	196	13809	15.046	0.485	0.043	0.784
474	ID37774616	37774616	63	5.225	94.420	22.587	0	3843.176	8	0.500	1	-10921639	145.433	142	122	200	14107	16.378	0.711	0.047	0.801
475	ID37784958	37784958	63	5.451	94.064	22.571	0	4323.573	9	0.500	1	-10921639	146.577	142	119	193	14218	15.751	0.491	0.043	0.762
476	ID37827302	37827302	64	1.087	116.024	37.413	0	0.000	0	0.500	1	-10921639	121.485	121	111	133	11784	5.307	0.495	0.008	0.347
477	ID37626252	37626252	64	0.942	116.801	36.643	0	480.397	1	0.500	1	-10921639	121.711	121	110	136	11806	5.037	1.900	0.008	0.375
478	ID37914589	37914589	64	1.099	116.994	36.673	0	960.794	2	0.500	1	-10921639	121.691	121	111	141	11804	5.540	0.493	0.011	0.479
479	ID37628524	37628524	64	0.885	117.555	37.159	0	1441.191	3	0.500	1	-10921639	120.680	120	111	137	11706	5.302	0.495	0.009	0.391
480	ID37718586	37718586	64	1.001	117.051	37.746	0	1921.588	4	0.500	1	-10921639	120.979	121	111	146	11735	6.103	1.900	0.007	0.260
481	ID37661928	37661928	64	1.238	117.273	37.023	0	2401.985	5	0.500	1	-10921639	121.660	120	112	149	11801	6.940	0.710	0.011	0.383
482	ID37631735	37631735	64	0.956	117.173	36.825	0	3362.779	7	0.500	1	-10921639	121.113	120	111	142	11748	5.612	1.400	0.006	0.256
483	ID37788236	37788236	64	1.140	117.047	37.647	0	3843.176	8	0.500	1	-10921639	121.289	120	110	140	11765	5.664	1.811	0.011	0.480
484	ID37797937	37797937	64	1.066	116.364	37.601	0	4323.573	9	0.500	1	-10921639	120.639	120	112	134	11702	4.857	1.598	0.012	0.610
485	ID37802473	37802473	65	1.174	127.860	2.679	0	0.000	0	0.500	1	-10921639	124.804	124	112	160	12106	8.006	0.722	0.015	0.448
486	ID37610636	37610636	65	1.421	128.556	2.321	0	480.397	1	0.500	1	-10921639	124.237	124	111	144	12051	6.985	1.604	0.014	0.504
487	ID37881989	37881989	65	0.948	128.448	2.074	0	960.794	2	0.500	1	-10921639	123.165	123	111	143	11947	6.973	1.900	0.009	0.331
488	ID37615477	37615477	65	1.071	128.524	2.036	0	1441.191	3	0.500	1	-10921639	122.536	122	108	146	11886	7.496	1.824	0.014	0.453
489	ID37697846	37697846	65	1.724	128.235	3.972	0	1921.588	4	0.500	1	-10921639	123.175	122	111	146	11948	8.032	1.578	0.020	0.595
490	ID37647505	37647505	65	1.754	128.315	3.594	0	2401.985	5	0.500	1	-10921639	124.464	124	109	153	12073	8.217	0.705	0.021	0.630
491	ID37786375	37786375	65	1.762	129.339	4.578	0	2882.382	6	0.500	1	-10921639	124.928	123	114	157	12118	8.353	1.813	0.007	0.222
492	ID37613259	37613259	65	1.870	127.971	3.440	0	3362.779	7	0.500	1	-10921639	124.990	124	113	150	12124	7.376	1.900	0.014	0.478
493	ID37747066	37747066	65	1.629	128.572	2.923	0	3843.176	8	0.500	1	-10921639	124.546	124	110	148	12081	7.378	1.900	0.016	0.534
494	ID37920489	37920489	66	1.028	39.579	155.560	0	0.000	0	0.500	1	-10921639	120.804	121	110	133	11718	5.263	1.387	0.007	0.329
495	ID37723817	37723817	66	0.999	40.427	154.757	0	480.397	1	0.500	1	-10921639	120.959	120	109	149	11733	5.816	1.598	0.007	0.294
496	ID37965627	37965627	66	1.016	40.833	154.400	0	960.794	2	0.500	1	-10921639	119.742	119	112	139	11615	5.478	1.900	0.010	0.429
497	ID37685409	37685409	66	1.325	40.881	154.750	0	1441.191	3	0.500	1	-10921639	121.959	122	111	141	11830	6.396	0.706	0.017	0.636
498	ID37813052	37813052	66	1.404	37.917	156.234	0	1921.588	4	0.500	1	-10921639	119.041	118	109	144	11547	6.152	1.606	0.014	0.529
499	ID37744000	37744000	66	1.304	37.831	156.334	0	2401.985	5	0.500	1	-10921639	120.216	119	107	136	11661	6.180	0.713	0.014	0.549
500	ID37927839	37927839	66	1.500	37.294	155.728	0	2882.382	6	0.500	1	-10921639	121.041	120	110	171	11741	8.580	0.704	0.019	0.529
501	ID37723285	37723285	66	1.223	37.892	155.318	0	3362.779	7	0.500	1	-10921639	121.021	119	109	176	11739	8.089	1.397	0.011	0.320
502	ID37876677	37876677	66	1.041	37.494	155.713	0	3843.176	8	0.500	1	-10921639	119.381	118	104	176	11580	8.985	1.122	-0.002	-0.053
503	ID37819117	37819117	67	1.464	73.997	24.163	0	0.000	0	0.500	1	-10921639	123.082	121	112	140	11939	6.454	0.490	0.014	0.511
504	ID37617169	37617169	67	1.504	75.341	23.559	0	480.397	1	0.500	1	-10921639	122.959	122	111	142	11927	7.097	0.479	0.012	0.427
505	ID37902341	37902341	67	1.706	75.498	23.061	0	960.794	2	0.500	1	-10921639	123.907	123	113	149	12019	7.277	0.488	0.014	0.483
506	ID37623180	37623180	67	2.061	76.012	22.814	0	1441.191	3	0.500	1	-10921639	123.691	121	112	155	11998	8.856	0.480	0.024	0.655
507	ID37700948	37700948	67	1.803	75.379	22.376	0	1921.588	4	0.500	1	-10921639	122.732	121	111	150	11905	8.055	0.482	0.021	0.641
508	ID37657265	37657265	67	2.119	75.778	23.151	0	2401.985	5	0.500	1	-10921639	124.866	123	112	155	12112	8.590	0.486	0.022	0.625
509	ID37809961	37809961	67	1.559	75.789	23.244	0	2882.382	6	0.500	1	-10921639	121.814	120	111	142	11816	6.953	1.900	0.014	0.492
510	ID37628322	37628322	67	1.907	75.274	22.646	0	3362.779	7	0.500	1	-10921639	122.866	122	107	144	11918	8.067	0.484	0.019	0.577
511	ID37778526	37778526	67	0.990	75.471	23.813	0	3843.176	8	0.500	1	-10921639	121.175	120	110	142	11754	6.103	1.900	0.007	0.257
512	ID37899758	37899758	68	1.857	149.539	113.689	0	0.000	0	0.500	1	-10921639	121.670	120	110	150	11802	8.156	0.492	0.020	0.586
513	ID37688191	37688191	68	1.387	149.842	113.332	0	480.397	1	0.500	1	-10921639	120.794	121	109	145	11717	6.152	0.708	0.014	0.547
514	ID37958598	37958598	68	1.390	149.887	113.961	0	960.794	2	0.500	1	-10921639	120.670	119	109	139	11705	6.427	0.481	0.012	0.438
515	ID37662950	37662950	68	1.304	152.135	114.179	0	1441.191	3	0.500	1	-10921639	119.959	119	108	151	11636	7.018	0.708	0.012	0.406
516	ID37765557	37765557	68	1.858	151.855	114.293	0	1921.588	4	0.500	1	-10921639	122.186	120	109	166	11852	8.337	0.711	0.022	0.643
517	ID37712204	37712204	68	1.184	151.887	112.905	0	2401.985	5	0.500	1	-10921639	120.670	120	109	133	11705	5.739	0.710	0.016	0.652
518	ID37883755	37883755	68	0.896	151.250	112.956	0	2882.382	6	0.500	1	-10921639	120.361	120	111	134	11675	4.369	1.900	0.007	0.377
519	ID37680647	37680647	68	1.299	151.966	113.329	0	3362.779	7	0.500	1	-10921639	120.701	120	106	137	11708	5.648	0.487	0.013	0.535
520	ID37851050	37851050	68	1.304	151.571	112.896	0	3843.176	8	0.500	1	-10921639	120.021	120	107	143	11642	6.690	1.587	0.018	0.633
521	ID37847717	37847717	68	1.322	150.227	113.982	0	4323.573	9	0.500	1	-10921639	121.670	120	111	144	11802	6.046	1.900	0.012	0.489
522	ID37945580	37945580	69	1.179	188.117	211.808	0	0.000	0	0.500	1	-10921639	122.072	121	112	140	11841	6.262	1.785	0.012	0.462
523	ID37785998	37785998	69	1.274	189.271	211.330	0	480.397	1	0.500	1	-10921639	122.845	122	112	150	11916	6.430	0.705	0.013	0.504
524	ID37975129	37975129	69	1.747	189.349	210.686	0	960.794	2	0.500	1	-10921639	123.608	122	110	158	11990	8.642	1.900	0.017	0.480
525	ID37726201	37726201	69	1.245	190.127	209.965	0	1441.191	3	0.500	1	-10921639	122.577	122	112	142	11890	5.771	0.478	0.014	0.583
526	ID37857852	37857852	69	1.462	189.426	209.593	0	1921.588	4	0.500	1	-10921639	122.876	121	113	143	11919	6.649	1.587	0.011	0.411
527	ID37781931	37781931	69	1.147	189.522	209.659	0	2401.985	5	0.500	1	-10921639	121.763	121	112	135	11811	5.560	1.790	0.012	0.503
528	ID37955285	37955285	69	1.084	189.755	211.081	0	2882.382	6	0.500	1	-10921639	121.794	121	111	144	11814	5.333	0.710	0.008	0.350
529	ID37938674	37938674	70	1.104	163.758	190.182	0	0.000	0	0.500	1	-10921639	121.897	122	111	137	11824	5.749	1.825	0.011	0.473
530	ID37758239	37758239	70	1.582	164.557	190.096	0	480.397	1	0.500	1	-10921639	122.526	121	111	146	11885	7.117	0.705	0.016	0.556
531	ID37971353	37971353	70	1.614	163.992	189.222	0	960.794	2	0.500	1	-10921639	122.474	120	110	150	11880	7.805	1.782	0.017	0.532
532	ID37711679	37711679	70	1.531	164.740	189.790	0	1441.191	3	0.500	1	-10921639	121.938	120	109	142	11828	6.858	1.900	0.018	0.616
533	ID37841726	37841726	70	1.358	163.876	188.715	0	1921.588	4	0.500	1	-10921639	123.320	122	110	145	11962	6.221	0.707	0.010	0.407
534	ID37765913	37765913	70	1.024	163.204	189.065	0	2401.985	5	0.500	1	-10921639	120.938	120	109	141	11731	5.942	1.801	0.010	0.398
535	ID37820915	37820915	71	1.105	159.160	26.172	0	0.000	0	0.500	1	-10921639	122.062	121	112	144	11840	6.328	0.705	0.010	0.382
536	ID37619972	37619972	71	1.038	159.624	26.172	0	480.397	1	0.500	1	-10921639	120.990	120	109	163	11736	7.448	1.793	0.015	0.469
537	ID37903617	37903617	71	1.056	159.633	25.968	0	960.794	2	0.500	1	-10921639	120.959	120	111	135	11733	5.646	0.497	0.007	0.303
538	ID37625193	37625193	71	1.401	159.712	26.006	0	1441.191	3	0.500	1	-10921639	120.979	119	109	165	11735	8.269	0.316	0.011	0.326
539	ID37714240	37714240	71	1.068	160.210	26.555	0	1921.588	4	0.500	1	-10921639	121.433	120	110	140	11779	6.339	1.900	0.011	0.406
540	ID37660311	37660311	71	1.632	159.897	26.673	0	2401.985	5	0.500	1	-10921639	122.660	121	111	145	11898	7.558	0.481	0.022	0.692
541	ID37813387	37813387	71	1.302	160.152	27.032	0	2882.382	6	0.500	1	-10921639	122.000	121	111	143	11834	6.704	0.489	0.011	0.410
542	ID37919985	37919985	72	1.319	150.031	154.687	0	0.000	0	0.500	1	-10921639	121.103	121	111	140	11747	5.691	1.833	0.013	0.545
543	ID37726237	37726237	72	1.123	151.504	154.881	0	480.397	1	0.500	1	-10921639	121.454	122	111	138	11781	5.160	0.490	0.007	0.344
544	ID37965586	37965586	72	0.921	151.124	154.001	0	960.794	2	0.500	1	-10921639	120.052	120	108	139	11645	6.025	1.900	0.013	0.506
545	ID37811433	37811433	72	1.139	150.857	154.171	0	1921.588	4	0.500	1	-10921639	120.495	119	113	138	11688	5.462	1.900	0.008	0.333
546	ID37742861	37742861	72	1.194	150.767	154.112	0	2401.985	5	0.500	1	-10921639	120.093	119	108	141	11649	6.248	1.606	0.012	0.461
547	ID37722632	37722632	72	1.064	150.717	154.502	0	3362.779	7	0.500	1	-10921639	120.629	120	112	138	11701	5.591	1.900	0.009	0.387
548	ID37876210	37876210	72	1.404	151.175	154.761	0	3843.176	8	0.500	1	-10921639	122.258	121	111	140	11859	6.075	1.900	0.008	0.331
549	ID37877390	37877390	72	1.308	150.874	154.924	0	4323.573	9	0.500	1	-10921639	120.670	119	111	154	11705	6.364	0.494	0.013	0.498
550	ID37944305	37944305	73	0.988	182.758	206.128	0	0.000	0	0.500	1	-10921639	120.464	119	111	146	11685	6.338	1.704	0.008	0.304
551	ID37769631	37769631	73	0.943	183.082	205.880	0	480.397	1	0.500	1	-10921639	120.216	120	108	146	11661	6.382	0.497	0.011	0.403
552	ID37932790	37932790	74	1.711	173.573	173.302	0	0.000	0	0.500	1	-10921639	122.753	121	110	143	11907	7.200	1.689	0.016	0.541
553	ID37748690	37748690	74	1.749	174.238	173.137	0	480.397	1	0.500	1	-10921639	123.969	124	111	148	12025	6.610	0.711	0.013	0.471
554	ID37968186	37968186	74	1.781	174.358	172.954	0	960.794	2	0.500	1	-10921639	123.412	122	110	157	11971	8.014	0.490	0.021	0.635
555	ID37700770	37700770	74	1.824	174.541	172.900	0	1441.191	3	0.500	1	-10921639	123.402	123	111	146	11970	7.673	0.476	0.023	0.709
556	ID37813652	37813652	74	1.768	174.458	172.752	0	1921.588	4	0.500	1	-10921639	123.124	120	110	149	11943	7.935	0.491	0.024	0.727
557	ID37757177	37757177	74	1.898	174.302	172.913	0	2401.985	5	0.500	1	-10921639	123.216	122	109	144	11952	8.195	0.709	0.023	0.685
558	ID37932104	37932104	74	1.991	174.214	173.197	0	2882.382	6	0.500	1	-10921639	123.928	123	110	152	12021	7.870	0.708	0.022	0.690
559	ID37737818	37737818	74	1.848	174.149	173.206	0	3362.779	7	0.500	1	-10921639	123.258	122	112	147	11956	7.471	0.490	0.020	0.632
560	ID37889264	37889264	74	2.058	174.527	172.974	0	3843.176	8	0.500	1	-10921639	123.093	121	113	154	11940	8.128	0.484	0.022	0.644
561	ID37883005	37883005	74	1.688	174.024	173.006	0	4323.573	9	0.500	1	-10921639	121.010	119	109	160	11738	8.071	1.606	0.020	0.599
562	ID37923064	37923064	75	1.298	84.321	145.027	0	0.000	0	0.500	1	-10921639	121.299	121	102	142	11766	6.679	1.900	0.015	0.531
563	ID37724455	37724455	75	0.887	86.932	147.408	0	480.397	1	0.500	1	-10921639	122.546	122	112	153	11887	6.362	1.585	0.009	0.333
564	ID37963803	37963803	75	1.376	86.955	147.157	0	960.794	2	0.500	1	-10921639	124.289	122	113	148	12056	7.460	0.468	0.014	0.460
565	ID37681399	37681399	75	1.000	87.424	148.230	0	1441.191	3	0.500	1	-10921639	121.619	120	110	148	11797	6.172	1.801	0.011	0.418
566	ID37803004	37803004	76	1.182	68.824	4.935	0	0.000	0	0.500	1	-10921639	121.155	120	107	142	11752	6.032	1.416	0.013	0.511
567	ID37610288	37610288	76	1.002	69.315	4.329	0	480.397	1	0.500	1	-10921639	121.845	121	112	157	11819	6.420	1.816	0.011	0.421
568	ID37886274	37886274	76	1.257	69.826	3.603	0	960.794	2	0.500	1	-10921639	122.289	121	111	145	11862	6.473	0.488	0.009	0.348
569	ID37615841	37615841	76	1.047	69.471	3.544	0	1441.191	3	0.500	1	-10921639	120.526	119	112	140	11691	5.644	1.844	0.014	0.580
570	ID37697623	37697623	76	1.048	69.386	3.214	0	1921.588	4	0.500	1	-10921639	120.928	120	110	144	11730	5.962	1.598	0.013	0.533
571	ID37647131	37647131	76	1.201	69.443	3.420	0	2401.985	5	0.500	1	-10921639	121.381	121	111	138	11774	5.917	1.596	0.010	0.390
572	ID37785993	37785993	76	1.105	69.620	3.906	0	2882.382	6	0.500	1	-10921639	122.371	121	112	145	11870	5.561	0.483	0.008	0.356
573	ID37613172	37613172	76	1.191	68.907	3.401	0	3362.779	7	0.500	1	-10921639	121.031	120	112	139	11740	5.671	1.624	0.015	0.616
574	ID37747270	37747270	76	0.887	69.426	3.488	0	3843.176	8	0.500	1	-10921639	120.041	120	111	132	11644	4.692	0.715	0.011	0.534
575	ID37771671	37771671	76	0.901	69.944	3.635	0	4323.573	9	0.500	1	-10921639	119.825	119	110	142	11623	5.898	1.084	0.009	0.358
576	ID37887104	37887104	77	1.692	63.536	98.824	0	0.000	0	0.500	1	-10921639	122.557	121	109	152	11888	7.432	0.492	0.013	0.411
577	ID37669422	37669422	77	0.999	64.127	99.089	0	480.397	1	0.500	1	-10921639	120.433	120	111	139	11682	5.677	1.726	0.010	0.410
578	ID37953104	37953104	77	0.910	64.249	99.121	0	960.794	2	0.500	1	-10921639	120.392	119	112	141	11678	5.030	1.615	0.006	0.291
579	ID37654606	37654606	77	1.013	63.745	98.487	0	1441.191	3	0.500	1	-10921639	120.794	120	110	144	11717	6.038	1.393	0.012	0.469
580	ID37759306	37759306	77	0.991	63.774	97.114	0	1921.588	4	0.500	1	-10921639	120.155	119	110	142	11655	5.718	1.697	0.010	0.427
581	ID37932416	37932416	78	1.380	216.271	172.146	0	0.000	0	0.500	1	-10921639	123.660	124	113	152	11995	6.501	0.497	0.012	0.437
582	ID37747836	37747836	78	1.801	216.183	172.226	0	480.397	1	0.500	1	-10921639	124.268	122	112	162	12054	8.341	1.803	0.008	0.246
583	ID37968565	37968565	78	1.594	216.228	172.026	0	960.794	2	0.500	1	-10921639	123.216	122	111	143	11952	6.090	0.717	0.014	0.575
584	ID37700235	37700235	78	1.442	216.975	172.168	0	1441.191	3	0.500	1	-10921639	122.691	122	112	144	11901	6.266	1.402	0.016	0.629
585	ID37818583	37818583	78	1.597	216.641	172.028	0	1921.588	4	0.500	1	-10921639	123.072	122	109	146	11938	7.181	0.711	0.021	0.711
586	ID37756902	37756902	78	1.752	216.491	172.500	0	2401.985	5	0.500	1	-10921639	123.588	122	108	146	11988	7.121	1.816	0.016	0.549
587	ID37931842	37931842	78	1.462	216.378	172.630	0	2882.382	6	0.500	1	-10921639	123.371	122	111	141	11967	6.571	1.599	0.012	0.437
588	ID37737618	37737618	78	1.228	216.276	172.889	0	3362.779	7	0.500	1	-10921639	122.361	122	110	147	11869	6.400	0.717	0.014	0.514
589	ID37889350	37889350	78	1.554	216.507	173.144	0	3843.176	8	0.500	1	-10921639	122.763	121	111	154	11908	7.540	0.490	0.011	0.352
590	ID37882894	37882894	78	1.241	216.032	172.783	0	4323.573	9	0.500	1	-10921639	122.227	122	112	152	11856	6.402	0.482	0.011	0.415
591	ID37944448	37944448	79	1.872	201.305	206.457	0	0.000	0	0.500	1	-10921639	122.701	121	112	145	11902	7.259	0.485	0.019	0.638
592	ID37777415	37777415	79	1.694	202.686	207.485	0	480.397	1	0.500	1	-10921639	122.959	121	112	145	11927	6.948	1.900	0.014	0.482
593	ID37931905	37931905	80	1.117	110.778	175.863	0	0.000	0	0.500	1	-10921639	120.526	119	112	142	11691	5.570	1.900	0.012	0.524
594	ID37751055	37751055	80	0.911	110.796	176.889	0	480.397	1	0.500	1	-10921639	119.320	118	112	136	11574	4.795	1.599	0.011	0.566
595	ID37969467	37969467	80	1.522	111.289	176.188	0	960.794	2	0.500	1	-10921639	121.619	120	111	143	11797	7.281	1.900	0.018	0.595
596	ID37701607	37701607	80	1.284	111.476	175.784	0	1441.191	3	0.500	1	-10921639	121.814	121	111	143	11816	6.609	0.482	0.008	0.307
597	ID37823884	37823884	80	1.222	111.692	175.002	0	1921.588	4	0.500	1	-10921639	120.660	120	110	150	11704	6.069	1.592	0.014	0.544
598	ID37760970	37760970	80	1.213	112.219	174.977	0	2401.985	5	0.500	1	-10921639	121.093	120	111	136	11746	5.530	0.709	0.010	0.449
599	ID37738566	37738566	80	1.162	113.043	175.850	0	3362.779	7	0.500	1	-10921639	119.969	119	109	148	11637	6.386	0.485	0.016	0.594
600	ID37888516	37888516	80	1.084	112.813	175.281	0	3843.176	8	0.500	1	-10921639	119.103	118	108	137	11553	6.148	1.900	0.016	0.609
601	ID37882981	37882981	80	0.950	109.660	172.969	0	4323.573	9	0.500	1	-10921639	120.433	120	110	142	11682	5.569	1.793	0.009	0.386
602	ID37883270	37883270	81	2.142	202.650	98.588	0	0.000	0	0.500	1	-10921639	121.381	119	108	151	11774	8.906	0.488	0.025	0.672
603	ID37672435	37672435	81	1.758	203.486	97.842	0	480.397	1	0.500	1	-10921639	119.515	117	109	157	11593	7.818	0.490	0.020	0.591
604	ID37951426	37951426	81	1.468	202.425	97.547	0	960.794	2	0.500	1	-10921639	121.124	120	110	139	11749	5.941	0.705	0.010	0.394
605	ID37654025	37654025	81	1.258	201.859	97.371	0	1441.191	3	0.500	1	-10921639	120.289	119	111	158	11668	6.680	0.705	0.019	0.658
606	ID37755914	37755914	81	1.409	202.360	97.370	0	1921.588	4	0.500	1	-10921639	120.155	119	111	147	11655	6.491	0.485	0.011	0.387
607	ID37700471	37700471	81	0.962	203.007	97.964	0	2401.985	5	0.500	1	-10921639	118.691	118	106	142	11513	5.617	0.487	0.008	0.326
608	ID37875474	37875474	81	1.359	202.613	98.713	0	2882.382	6	0.500	1	-10921639	119.959	118	108	162	11636	7.642	1.773	0.013	0.406
609	ID37674270	37674270	81	1.369	202.354	98.225	0	3362.779	7	0.500	1	-10921639	120.784	120	109	142	11716	5.999	1.900	0.016	0.649
610	ID37839742	37839742	81	1.333	203.144	98.325	0	3843.176	8	0.500	1	-10921639	119.876	118	109	141	11628	6.524	1.814	0.013	0.463
611	ID37834675	37834675	81	1.729	202.353	98.343	0	4323.573	9	0.500	1	-10921639	120.216	118	107	148	11661	7.746	0.713	0.019	0.577
612	ID37931142	37931142	82	0.932	113.820	169.053	0	0.000	0	0.500	1	-10921639	120.835	120	111	139	11721	5.171	1.900	0.006	0.286
613	ID37742149	37742149	82	1.304	114.393	168.617	0	480.397	1	0.500	1	-10921639	121.670	122	110	136	11802	5.998	0.708	0.016	0.630
614	ID37967453	37967453	82	1.448	114.730	168.391	0	960.794	2	0.500	1	-10921639	122.474	121	109	141	11880	6.400	0.480	0.012	0.470
615	ID37700072	37700072	82	1.034	113.646	171.898	0	1441.191	3	0.500	1	-10921639	119.443	118	110	142	11586	6.102	0.702	0.009	0.330
616	ID37833097	37833097	83	2.997	66.389	38.898	0	0.000	0	0.500	1	-10921639	126.856	122	110	157	12305	11.493	0.486	0.032	0.690
617	ID37625247	37625247	83	2.378	67.132	38.572	0	480.397	1	0.500	1	-10921639	126.639	124	113	157	12284	8.932	1.598	0.022	0.603
618	ID37913118	37913118	83	2.025	67.516	38.390	0	960.794	2	0.500	1	-10921639	125.814	125	113	155	12204	8.231	0.492	0.019	0.563
619	ID37629064	37629064	83	1.593	67.944	38.479	0	1441.191	3	0.500	1	-10921639	123.722	122	112	148	12001	6.834	1.900	0.018	0.654
620	ID37718934	37718934	83	1.317	67.955	38.388	0	1921.588	4	0.500	1	-10921639	123.144	122	112	144	11945	6.423	0.490	0.013	0.495
621	ID37667778	37667778	83	1.399	67.802	37.922	0	2401.985	5	0.500	1	-10921639	123.649	123	112	145	11994	6.141	0.705	0.012	0.495
622	ID37824120	37824120	83	1.402	67.484	38.483	0	2882.382	6	0.500	1	-10921639	124.918	125	113	145	12117	6.053	0.488	0.014	0.576
623	ID37632901	37632901	83	2.075	68.227	39.083	0	3362.779	7	0.500	1	-10921639	126.216	125	113	161	12243	8.957	1.900	0.016	0.435
624	ID37793754	37793754	83	1.621	67.685	39.259	0	3843.176	8	0.500	1	-10921639	125.309	124	114	148	12155	7.097	0.488	0.014	0.486
625	ID37798932	37798932	83	1.534	67.169	39.449	0	4323.573	9	0.500	1	-10921639	123.948	123	112	156	12023	7.030	0.713	0.017	0.602
626	ID37942411	37942411	84	1.730	77.388	203.514	0	0.000	0	0.500	1	-10921639	124.753	124	112	144	12101	7.175	0.481	0.020	0.687
627	ID37767750	37767750	84	1.440	78.888	203.270	0	480.397	1	0.500	1	-10921639	122.866	122	110	146	11918	6.757	0.480	0.014	0.488
628	ID37973028	37973028	84	1.089	78.489	202.813	0	960.794	2	0.500	1	-10921639	122.320	122	113	140	11865	5.259	0.482	0.011	0.489
629	ID37721797	37721797	84	1.282	78.204	203.908	0	1441.191	3	0.500	1	-10921639	122.907	121	111	145	11922	6.626	0.493	0.014	0.520
630	ID37949320	37949320	85	0.908	214.954	219.816	0	0.000	0	0.500	1	-10921639	120.897	120	110	137	11727	4.932	1.098	0.005	0.240
631	ID37792814	37792814	85	2.175	211.683	221.325	0	480.397	1	0.500	1	-10921639	114.000	118	46	147	11058	21.325	1.794	0.061	0.611
632	ID37975492	37975492	85	1.701	212.279	220.805	0	960.794	2	0.500	1	-10921639	122.423	121	110	142	11875	8.062	1.816	0.016	0.464
633	ID37734215	37734215	85	1.336	211.461	220.820	0	1441.191	3	0.500	1	-10921639	122.196	121	109	144	11853	7.132	1.900	0.012	0.413
634	ID37856071	37856071	85	1.368	211.058	220.606	0	1921.588	4	0.500	1	-10921639	121.887	120	110	144	11823	6.699	0.491	0.015	0.548
635	ID37931923	37931923	86	1.059	217.361	175.866	0	0.000	0	0.500	1	-10921639	121.495	121	107	140	11785	5.844	1.586	0.016	0.647
636	ID37745959	37745959	86	1.094	217.535	175.184	0	480.397	1	0.500	1	-10921639	121.959	121	111	137	11830	5.972	0.710	0.013	0.525
637	ID37969328	37969328	86	1.261	218.321	175.146	0	960.794	2	0.500	1	-10921639	121.289	120	111	149	11765	6.286	1.609	0.009	0.353
638	ID37701330	37701330	86	1.177	218.473	175.298	0	1441.191	3	0.500	1	-10921639	122.082	121	107	148	11842	5.989	1.838	0.012	0.491
639	ID37824215	37824215	86	1.246	218.560	175.270	0	1921.588	4	0.500	1	-10921639	121.845	122	110	139	11819	5.754	1.815	0.016	0.674
640	ID37761085	37761085	86	1.166	218.490	175.159	0	2401.985	5	0.500	1	-10921639	121.598	122	109	138	11795	5.629	0.709	0.010	0.443
641	ID37740418	37740418	86	1.156	217.917	175.021	0	3362.779	7	0.500	1	-10921639	122.196	121	110	141	11853	6.840	1.387	0.007	0.253
642	ID37888560	37888560	86	1.000	217.746	175.331	0	3843.176	8	0.500	1	-10921639	120.959	121	109	142	11733	5.777	0.707	0.009	0.389
643	ID37883432	37883432	86	1.040	217.426	175.273	0	4323.573	9	0.500	1	-10921639	120.320	119	108	145	11671	6.506	0.489	0.007	0.258
644	ID37920912	37920912	87	1.788	175.202	153.179	0	0.000	0	0.500	1	-10921639	124.423	122	113	154	12069	7.982	1.399	0.020	0.626
645	ID37732065	37732065	87	1.192	175.869	152.542	0	480.397	1	0.500	1	-10921639	122.175	121	109	136	11851	5.594	1.900	0.012	0.529
646	ID37964648	37964648	87	1.374	175.597	152.913	0	960.794	2	0.500	1	-10921639	122.959	123	109	140	11927	6.015	1.396	0.009	0.355
647	ID37683598	37683598	87	1.285	175.760	152.978	0	1441.191	3	0.500	1	-10921639	122.330	122	112	143	11866	6.082	0.703	0.013	0.524
648	ID37795518	37795518	87	1.525	176.059	152.490	0	1921.588	4	0.500	1	-10921639	123.010	122	110	150	11932	6.984	1.790	0.017	0.574
649	ID37744613	37744613	87	1.495	176.044	152.767	0	2401.985	5	0.500	1	-10921639	123.485	123	114	142	11978	6.424	1.900	0.011	0.426
650	ID37719623	37719623	87	1.531	175.874	152.864	0	3362.779	7	0.500	1	-10921639	123.196	123	110	145	11950	6.814	0.710	0.014	0.495
651	ID37877688	37877688	87	1.003	175.893	152.544	0	3843.176	8	0.500	1	-10921639	121.515	121	113	135	11787	4.882	1.392	0.009	0.464
652	ID37871209	37871209	87	0.909	175.494	153.081	0	4323.573	9	0.500	1	-10921639	119.536	119	110	153	11595	6.073	1.900	0.013	0.500
653	ID37942160	37942160	88	1.452	210.291	207.729	0	0.000	0	0.500	1	-10921639	122.351	122	109	143	11868	5.967	0.490	0.015	0.615
654	ID37770855	37770855	88	1.192	209.372	206.813	0	480.397	1	0.500	1	-10921639	121.928	121	113	139	11827	5.576	0.486	0.009	0.378
655	ID37974104	37974104	88	1.241	209.334	206.019	0	960.794	2	0.500	1	-10921639	122.155	122	110	145	11849	5.771	0.708	0.010	0.423
656	ID37723555	37723555	88	0.975	209.453	206.387	0	1441.191	3	0.500	1	-10921639	120.938	120	110	137	11731	5.393	1.810	0.011	0.479
657	ID37849625	37849625	88	1.090	209.566	206.803	0	1921.588	4	0.500	1	-10921639	121.845	122	111	137	11819	5.363	0.494	0.010	0.464
658	ID37789376	37789376	88	1.399	209.366	207.145	0	2401.985	5	0.500	1	-10921639	121.887	121	109	167	11823	8.793	0.494	0.018	0.483
659	ID37952780	37952780	88	0.984	209.396	207.389	0	2882.382	6	0.500	1	-10921639	120.897	119	112	148	11727	6.319	1.900	0.007	0.283
660	ID37763875	37763875	88	1.057	209.200	206.983	0	3362.779	7	0.500	1	-10921639	121.206	120	112	138	11757	5.385	1.388	0.012	0.529
661	ID37917018	37917018	88	0.930	210.022	207.532	0	3843.176	8	0.500	1	-10921639	120.907	121	110	138	11728	5.077	1.826	0.007	0.341
662	ID37911484	37911484	88	0.922	211.590	209.821	0	4323.573	9	0.500	1	-10921639	120.629	120	110	153	11701	6.968	0.312	0.011	0.393
663	ID37880726	37880726	89	1.392	55.073	92.580	0	0.000	0	0.500	1	-10921639	120.680	119	109	137	11706	6.806	1.900	0.014	0.483
664	ID37672169	37672169	89	1.136	55.580	92.611	0	480.397	1	0.500	1	-10921639	119.845	118	112	142	11625	5.463	1.900	0.009	0.371
665	ID37951656	37951656	89	1.214	55.678	92.207	0	960.794	2	0.500	1	-10921639	120.938	120	110	138	11731	5.730	1.900	0.015	0.644
666	ID37651162	37651162	89	1.016	55.909	92.125	0	1441.191	3	0.500	1	-10921639	120.361	120	109	139	11675	5.386	0.491	0.009	0.392
667	ID37753019	37753019	89	1.354	55.804	91.966	0	1921.588	4	0.500	1	-10921639	121.227	120	111	138	11759	6.232	0.489	0.014	0.529
668	ID37876650	37876650	89	1.009	56.808	93.355	0	2882.382	6	0.500	1	-10921639	121.361	121	108	136	11772	5.862	1.627	0.006	0.263
669	ID37667874	37667874	89	0.915	57.167	93.144	0	3362.779	7	0.500	1	-10921639	120.237	119	109	141	11663	6.319	0.728	0.009	0.343
670	ID37833487	37833487	89	1.006	57.320	93.318	0	3843.176	8	0.500	1	-10921639	119.845	119	108	138	11625	5.925	0.483	0.009	0.354
671	ID37833629	37833629	89	1.455	57.741	93.190	0	4323.573	9	0.500	1	-10921639	119.856	118	108	149	11626	7.327	0.702	0.014	0.458
672	ID37891479	37891479	90	1.495	23.652	106.913	0	0.000	0	0.500	1	-10921639	119.814	119	110	134	11622	5.925	0.487	0.017	0.674
673	ID37677356	37677356	90	1.800	24.095	106.124	0	480.397	1	0.500	1	-10921639	121.258	119	110	144	11762	7.153	1.900	0.014	0.475
674	ID37957004	37957004	90	1.269	24.464	106.352	0	960.794	2	0.500	1	-10921639	118.959	118	107	140	11539	6.610	1.800	0.014	0.480
675	ID37658718	37658718	90	1.108	24.758	106.432	0	1441.191	3	0.500	1	-10921639	119.536	118	108	136	11595	5.674	1.900	0.011	0.466
676	ID37760665	37760665	90	0.904	24.528	105.937	0	1921.588	4	0.500	1	-10921639	119.237	119	110	131	11566	4.937	0.493	0.006	0.280
677	ID37705759	37705759	90	1.006	24.554	105.702	0	2401.985	5	0.500	1	-10921639	119.990	119	109	135	11639	4.993	1.591	0.014	0.670
678	ID37889799	37889799	90	1.524	24.796	106.368	0	2882.382	6	0.500	1	-10921639	120.278	120	109	151	11667	7.188	0.490	0.019	0.640
679	ID37678756	37678756	90	0.957	24.683	106.151	0	3362.779	7	0.500	1	-10921639	118.969	118	109	136	11540	5.572	0.497	0.011	0.469
680	ID37844706	37844706	90	1.074	24.624	106.149	0	3843.176	8	0.500	1	-10921639	119.309	118	109	133	11573	5.390	1.900	0.011	0.488
681	ID37888148	37888148	91	1.027	196.469	99.961	0	0.000	0	0.500	1	-10921639	118.773	118	110	137	11521	5.828	1.791	0.015	0.611
682	ID37670057	37670057	91	1.111	196.155	99.894	0	480.397	1	0.500	1	-10921639	117.856	117	107	131	11432	5.290	0.489	0.009	0.418
683	ID37954675	37954675	91	1.645	197.302	98.603	0	960.794	2	0.500	1	-10921639	119.588	118	107	144	11600	7.046	0.480	0.011	0.357
684	ID37655222	37655222	91	1.049	197.188	99.597	0	1441.191	3	0.500	1	-10921639	118.825	118	110	136	11526	5.668	0.708	0.012	0.511
685	ID37761147	37761147	91	0.898	197.693	99.439	0	1921.588	4	0.500	1	-10921639	118.629	118	108	135	11507	5.613	1.600	0.013	0.551
686	ID37707675	37707675	91	0.890	197.790	99.458	0	2401.985	5	0.500	1	-10921639	119.320	118	110	138	11574	5.682	1.107	0.003	0.119
687	ID37674672	37674672	91	1.082	197.679	98.822	0	3362.779	7	0.500	1	-10921639	119.732	120	107	132	11614	5.063	1.396	0.009	0.406
688	ID37840258	37840258	91	1.159	197.886	98.832	0	3843.176	8	0.500	1	-10921639	119.206	119	108	132	11563	5.216	0.486	0.009	0.430
689	ID37837431	37837431	91	0.990	197.821	98.773	0	4323.573	9	0.500	1	-10921639	119.216	118	109	141	11564	5.663	1.795	0.011	0.461
690	ID37875104	37875104	92	1.034	105.047	86.690	0	0.000	0	0.500	1	-10921639	119.763	120	108	136	11617	5.410	0.482	0.009	0.379
691	ID37655801	37655801	92	1.024	105.932	87.077	0	480.397	1	0.500	1	-10921639	120.289	120	111	137	11668	5.412	1.900	0.010	0.429
692	ID37949282	37949282	92	0.892	105.880	85.943	0	960.794	2	0.500	1	-10921639	119.959	120	111	148	11636	5.768	0.496	0.005	0.203
693	ID37746138	37746138	92	1.196	106.670	86.216	0	1921.588	4	0.500	1	-10921639	121.423	120	111	157	11778	7.180	1.900	0.012	0.412
694	ID37691928	37691928	92	0.905	106.734	85.270	0	2401.985	5	0.500	1	-10921639	119.639	119	107	136	11605	5.867	1.799	0.006	0.237
695	ID37864757	37864757	92	1.058	106.511	85.478	0	2882.382	6	0.500	1	-10921639	120.474	120	110	141	11686	5.730	1.594	0.012	0.513
696	ID37670739	37670739	92	1.286	106.069	85.778	0	3362.779	7	0.500	1	-10921639	121.371	121	110	143	11773	6.515	0.494	0.011	0.397
697	ID37823832	37823832	92	0.966	105.901	86.911	0	3843.176	8	0.500	1	-10921639	119.742	119	110	139	11615	5.442	1.900	0.016	0.707
698	ID37921700	37921700	93	1.693	105.492	154.352	0	0.000	0	0.500	1	-10921639	122.732	122	110	152	11905	7.139	1.607	0.016	0.538
699	ID37722812	37722812	93	1.235	105.549	153.852	0	480.397	1	0.500	1	-10921639	121.103	120	110	137	11747	5.952	0.491	0.016	0.653
700	ID37965490	37965490	93	1.265	105.326	153.435	0	960.794	2	0.500	1	-10921639	121.711	123	110	141	11806	6.102	1.626	0.011	0.444
701	ID37683875	37683875	93	1.655	106.085	153.455	0	1441.191	3	0.500	1	-10921639	122.959	121	111	146	11927	7.099	0.489	0.015	0.517
702	ID37811050	37811050	93	1.335	106.067	153.272	0	1921.588	4	0.500	1	-10921639	123.268	123	112	140	11957	5.574	0.703	0.008	0.368
703	ID37742508	37742508	93	1.747	106.345	153.508	0	2401.985	5	0.500	1	-10921639	122.804	121	111	154	11912	7.855	1.900	0.017	0.512
704	ID37921296	37921296	93	1.645	106.183	153.666	0	2882.382	6	0.500	1	-10921639	123.753	123	111	146	12004	6.999	1.900	0.018	0.613
705	ID37720458	37720458	93	1.342	106.598	153.836	0	3362.779	7	0.500	1	-10921639	122.619	122	112	157	11894	6.657	1.589	0.011	0.393
706	ID37846953	37846953	94	1.317	186.482	59.269	0	0.000	0	0.500	1	-10921639	123.165	122	111	147	11947	6.477	0.708	0.016	0.582
707	ID37639941	37639941	94	1.385	186.790	59.597	0	480.397	1	0.500	1	-10921639	124.433	124	112	141	12070	6.898	1.389	0.010	0.363
708	ID37933291	37933291	94	1.071	185.705	58.906	0	960.794	2	0.500	1	-10921639	121.454	121	113	138	11781	5.132	1.716	0.015	0.680
709	ID37636836	37636836	94	1.021	185.650	58.960	0	1441.191	3	0.500	1	-10921639	121.845	121	111	136	11819	5.466	1.900	0.010	0.423
710	ID37729958	37729958	94	1.199	186.224	59.052	0	1921.588	4	0.500	1	-10921639	121.948	120	108	148	11829	6.665	1.790	0.015	0.550
711	ID37682115	37682115	94	1.118	186.355	59.114	0	2401.985	5	0.500	1	-10921639	121.268	120	109	136	11763	5.715	0.489	0.012	0.516
712	ID37846632	37846632	94	0.901	185.059	58.385	0	2882.382	6	0.500	1	-10921639	121.144	121	110	134	11751	4.878	0.491	0.008	0.381
713	ID37642988	37642988	94	1.871	185.127	58.940	0	3362.779	7	0.500	1	-10921639	124.268	123	111	146	12054	7.608	1.900	0.017	0.538
714	ID37808519	37808519	94	1.632	185.737	59.861	0	3843.176	8	0.500	1	-10921639	123.577	122	114	153	11987	7.398	1.900	0.011	0.373
715	ID37809956	37809956	94	1.711	184.375	60.283	0	4323.573	9	0.500	1	-10921639	123.835	123	108	154	12012	7.599	0.701	0.014	0.434
716	ID37885096	37885096	95	1.943	68.993	95.659	0	0.000	0	0.500	1	-10921639	123.608	122	111	151	11990	7.832	0.484	0.021	0.657
717	ID37669115	37669115	95	1.713	70.123	95.677	0	480.397	1	0.500	1	-10921639	123.691	122	113	147	11998	7.122	0.479	0.016	0.558
718	ID37952480	37952480	95	1.181	70.392	95.747	0	960.794	2	0.500	1	-10921639	122.144	121	110	142	11848	6.315	1.200	0.005	0.176
719	ID37652670	37652670	95	1.176	70.689	95.067	0	1441.191	3	0.500	1	-10921639	121.515	121	111	141	11787	6.323	1.841	0.011	0.426
720	ID37695311	37695311	95	1.012	70.465	94.115	0	2401.985	5	0.500	1	-10921639	121.979	121	109	151	11832	6.296	0.706	0.013	0.479
721	ID37876542	37876542	95	0.985	69.696	94.003	0	2882.382	6	0.500	1	-10921639	122.402	122	113	144	11873	5.440	1.603	0.009	0.382
722	ID37947048	37947048	96	2.305	194.842	210.735	0	0.000	0	0.500	1	-10921639	127.959	125	113	171	12412	9.478	0.490	0.023	0.617
723	ID37785135	37785135	96	1.972	195.524	210.589	0	480.397	1	0.500	1	-10921639	127.526	126	115	157	12370	9.034	0.493	0.017	0.481
724	ID37973914	37973914	96	1.697	195.848	209.667	0	960.794	2	0.500	1	-10921639	127.660	127	115	148	12383	6.620	0.714	0.014	0.537
725	ID37724717	37724717	96	1.652	196.078	209.488	0	1441.191	3	0.500	1	-10921639	128.237	127	114	149	12439	7.119	1.200	0.008	0.284
726	ID37857519	37857519	96	1.726	196.047	209.206	0	1921.588	4	0.500	1	-10921639	126.835	126	111	144	12303	7.028	0.488	0.016	0.561
727	ID37782100	37782100	96	1.043	196.289	209.697	0	2401.985	5	0.500	1	-10921639	125.423	124	114	143	12166	5.662	1.686	0.007	0.327
728	ID37954798	37954798	96	1.540	196.160	209.492	0	2882.382	6	0.500	1	-10921639	127.567	127	115	146	12374	6.557	0.706	0.011	0.430
729	ID37769711	37769711	96	1.932	196.399	209.564	0	3362.779	7	0.500	1	-10921639	128.577	127	115	149	12472	8.043	1.805	0.019	0.591
730	ID37916045	37916045	96	2.043	196.489	209.718	0	3843.176	8	0.500	1	-10921639	127.969	126	116	158	12413	8.131	0.485	0.018	0.567
731	ID37911408	37911408	96	1.878	195.906	209.732	0	4323.573	9	0.500	1	-10921639	127.711	127	115	148	12388	7.159	0.482	0.014	0.479
732	ID37824429	37824429	97	1.019	164.307	29.900	0	0.000	0	0.500	1	-10921639	121.588	121	111	162	11794	7.448	0.489	0.007	0.223
733	ID37621357	37621357	97	0.968	163.725	30.257	0	480.397	1	0.500	1	-10921639	121.082	121	108	168	11745	7.731	1.607	0.012	0.357
734	ID37626015	37626015	97	0.926	163.229	30.324	0	1441.191	3	0.500	1	-10921639	120.309	119	108	141	11670	6.097	1.605	0.013	0.525
735	ID37708504	37708504	97	1.387	163.228	30.405	0	1921.588	4	0.500	1	-10921639	121.041	120	109	144	11741	7.121	1.592	0.015	0.507
736	ID37663721	37663721	97	1.272	163.109	31.210	0	2401.985	5	0.500	1	-10921639	121.227	120	111	140	11759	6.294	1.900	0.011	0.433
737	ID37822680	37822680	97	1.207	163.418	31.718	0	2882.382	6	0.500	1	-10921639	121.247	120	111	143	11761	6.024	0.491	0.018	0.711
738	ID37629084	37629084	97	1.544	163.094	30.289	0	3362.779	7	0.500	1	-10921639	122.814	121	112	159	11913	8.508	0.476	0.006	0.184
739	ID37779836	37779836	97	1.236	163.816	30.014	0	3843.176	8	0.500	1	-10921639	121.784	120	111	149	11813	7.447	0.713	0.009	0.297
740	ID37793519	37793519	97	0.946	163.142	30.194	0	4323.573	9	0.500	1	-10921639	121.134	120	112	137	11750	5.656	1.900	0.010	0.428
741	ID37913516	37913516	98	1.278	118.014	144.237	0	0.000	0	0.500	1	-10921639	122.093	121	111	136	11843	5.705	0.715	0.012	0.511
742	ID37717376	37717376	98	0.918	118.770	144.244	0	480.397	1	0.500	1	-10921639	120.567	120	110	136	11695	5.010	1.840	0.010	0.462
743	ID37964705	37964705	98	1.041	118.458	144.461	0	960.794	2	0.500	1	-10921639	119.948	119	109	141	11635	5.187	1.402	0.011	0.506
744	ID37679133	37679133	98	0.897	119.453	144.168	0	1441.191	3	0.500	1	-10921639	119.794	119	111	135	11620	5.385	1.764	0.006	0.267
745	ID37790333	37790333	98	0.984	119.199	143.728	0	1921.588	4	0.500	1	-10921639	120.577	121	111	135	11696	5.240	1.821	0.015	0.690
746	ID37741050	37741050	98	1.142	118.888	143.947	0	2401.985	5	0.500	1	-10921639	121.649	121	110	142	11800	6.142	0.710	0.013	0.495
747	ID37918890	37918890	98	1.504	118.846	144.297	0	2882.382	6	0.500	1	-10921639	122.794	123	110	143	11911	6.481	1.792	0.013	0.481
748	ID37708784	37708784	98	0.921	118.690	143.399	0	3362.779	7	0.500	1	-10921639	121.784	120	109	141	11813	6.384	1.800	0.010	0.391
749	ID37869815	37869815	98	0.929	118.973	144.539	0	3843.176	8	0.500	1	-10921639	120.021	119	110	148	11642	5.594	1.803	0.007	0.291
750	ID37865965	37865965	98	0.894	118.467	144.655	0	4323.573	9	0.500	1	-10921639	119.485	119	108	141	11590	5.585	1.781	0.014	0.605
751	ID37878200	37878200	99	1.069	107.264	91.041	0	0.000	0	0.500	1	-10921639	120.454	119	111	139	11684	5.268	0.494	0.013	0.595
752	ID37662345	37662345	99	0.928	107.314	91.095	0	480.397	1	0.500	1	-10921639	118.887	117	111	152	11532	5.675	1.789	0.010	0.433
753	ID37950696	37950696	99	0.910	107.398	90.700	0	960.794	2	0.500	1	-10921639	120.330	120	110	141	11672	5.522	1.841	0.011	0.454
754	ID37650773	37650773	99	0.932	107.741	90.894	0	1441.191	3	0.500	1	-10921639	120.351	120	108	134	11674	5.549	0.487	0.011	0.475
755	ID37752410	37752410	99	1.174	107.781	90.875	0	1921.588	4	0.500	1	-10921639	120.278	120	110	141	11667	5.728	0.491	0.015	0.641
756	ID37697558	37697558	99	1.063	107.388	91.093	0	2401.985	5	0.500	1	-10921639	120.361	120	112	135	11675	5.298	1.900	0.011	0.486
757	ID37868209	37868209	99	1.427	107.236	91.218	0	2882.382	6	0.500	1	-10921639	121.794	120	112	144	11814	6.469	0.492	0.014	0.509
758	ID37672718	37672718	99	1.026	107.136	91.500	0	3362.779	7	0.500	1	-10921639	120.515	119	110	136	11690	5.564	1.792	0.010	0.414
759	ID37831377	37831377	99	0.998	107.904	92.049	0	3843.176	8	0.500	1	-10921639	119.649	118	109	134	11606	5.856	1.394	0.006	0.227
760	ID37832617	37832617	99	0.926	106.750	91.532	0	4323.573	9	0.500	1	-10921639	119.320	119	107	139	11574	5.924	1.832	0.014	0.566
761	ID37932731	37932731	100	2.213	178.581	173.158	0	0.000	0	0.500	1	-10921639	127.680	125	115	151	12385	8.753	0.486	0.016	0.449
762	ID37748466	37748466	100	2.159	179.410	172.909	0	480.397	1	0.500	1	-10921639	128.041	126	112	175	12420	8.969	0.493	0.022	0.622
763	ID37968196	37968196	100	2.953	179.692	172.991	0	960.794	2	0.500	1	-10921639	129.351	127	113	171	12547	11.559	0.487	0.025	0.553
764	ID37700773	37700773	100	2.320	179.837	172.874	0	1441.191	3	0.500	1	-10921639	127.918	126	110	173	12408	10.315	0.709	0.025	0.615
765	ID37813656	37813656	100	2.462	179.459	172.815	0	1921.588	4	0.500	1	-10921639	127.454	124	112	202	12363	11.694	0.487	0.020	0.417
766	ID37757216	37757216	100	2.533	179.624	172.985	0	2401.985	5	0.500	1	-10921639	127.660	126	114	189	12383	10.707	0.462	0.020	0.479
767	ID37932045	37932045	100	2.372	179.433	173.167	0	2882.382	6	0.500	1	-10921639	127.454	124	113	189	12363	11.310	0.490	0.026	0.561
768	ID37737898	37737898	100	2.736	179.817	173.310	0	3362.779	7	0.500	1	-10921639	128.485	128	114	167	12463	9.796	0.490	0.032	0.819
769	ID37889548	37889548	100	2.462	179.859	173.461	0	3843.176	8	0.500	1	-10921639	127.546	126	116	158	12372	9.131	0.487	0.023	0.615
770	ID37888718	37888718	100	2.416	179.714	173.559	0	4323.573	9	0.500	1	-10921639	127.814	126	115	163	12398	9.510	1.900	0.027	0.702
771	ID37673740	37673740	101	1.593	49.157	104.014	0	480.397	1	0.500	1	-10921639	121.577	120	110	153	11793	7.486	0.487	0.014	0.464
772	ID37955141	37955141	101	1.793	49.181	103.361	0	960.794	2	0.500	1	-10921639	123.134	121	108	157	11944	7.916	1.900	0.023	0.712
773	ID37657120	37657120	101	1.138	49.155	103.202	0	1441.191	3	0.500	1	-10921639	122.928	122	112	142	11924	5.927	0.707	0.010	0.416
774	ID37757738	37757738	101	1.238	49.479	103.376	0	1921.588	4	0.500	1	-10921639	122.186	121	109	138	11852	6.146	1.900	0.016	0.611
775	ID37709986	37709986	101	1.514	49.076	103.514	0	2401.985	5	0.500	1	-10921639	123.701	122	110	152	11999	8.328	1.900	0.015	0.444
776	ID37880576	37880576	101	0.941	49.063	104.034	0	2882.382	6	0.500	1	-10921639	120.649	119	110	143	11703	5.766	1.593	0.006	0.267
777	ID37678076	37678076	101	1.012	49.322	103.573	0	3362.779	7	0.500	1	-10921639	121.381	120	109	144	11774	7.119	0.717	0.014	0.455
778	ID37841999	37841999	101	0.988	49.198	103.061	0	3843.176	8	0.500	1	-10921639	119.433	118	110	155	11585	6.624	1.787	0.014	0.481
779	ID37841851	37841851	101	1.168	48.971	102.595	0	4323.573	9	0.500	1	-10921639	119.072	118	109	142	11550	5.901	1.900	0.010	0.387
780	ID37610724	37610724	102	1.508	150.803	2.584	0	480.397	1	0.500	1	-10921639	122.948	121	113	151	11926	7.219	1.611	0.016	0.527
781	ID37882955	37882955	102	0.903	151.611	2.863	0	960.794	2	0.500	1	-10921639	121.732	121	111	147	11808	5.866	1.805	0.007	0.301
782	ID37615530	37615530	102	0.892	152.053	2.765	0	1441.191	3	0.500	1	-10921639	121.856	121	110	139	11820	6.175	1.083	0.008	0.324
783	ID37960544	37960544	103	1.516	162.706	119.994	0	960.794	2	0.500	1	-10921639	121.103	119	109	151	11747	7.020	0.483	0.013	0.457
784	ID37665273	37665273	103	1.481	162.833	120.066	0	1441.191	3	0.500	1	-10921639	121.155	120	109	151	11752	7.389	0.704	0.015	0.470
785	ID37773037	37773037	103	1.629	162.705	120.108	0	1921.588	4	0.500	1	-10921639	121.309	120	110	150	11767	6.951	1.813	0.016	0.538
786	ID37716615	37716615	103	1.477	162.554	120.287	0	2401.985	5	0.500	1	-10921639	121.639	121	109	142	11799	6.776	1.900	0.013	0.447
787	ID37895066	37895066	103	1.391	162.485	120.373	0	2882.382	6	0.500	1	-10921639	121.454	121	111	137	11781	6.202	0.716	0.016	0.626
788	ID37943918	37943918	104	1.414	55.697	82.371	0	960.794	2	0.500	1	-10921639	120.041	119	110	139	11644	5.942	1.596	0.017	0.662
789	ID37645183	37645183	104	1.781	56.482	81.714	0	1441.191	3	0.500	1	-10921639	121.629	121	109	147	11798	7.861	1.794	0.018	0.543
790	ID37690620	37690620	104	1.516	55.392	81.462	0	2401.985	5	0.500	1	-10921639	120.928	120	110	148	11730	7.230	0.936	0.025	0.800
791	ID37866670	37866670	104	1.139	55.265	81.465	0	2882.382	6	0.500	1	-10921639	120.619	119	111	142	11700	5.989	1.784	0.009	0.366
792	ID37655143	37655143	104	0.940	56.377	77.743	0	3362.779	7	0.500	1	-10921639	119.515	119	111	139	11593	5.768	0.710	0.015	0.603
793	ID37820890	37820890	104	1.011	55.384	81.390	0	3843.176	8	0.500	1	-10921639	120.680	120	111	144	11706	5.685	0.708	0.013	0.534
794	ID37827060	37827060	104	1.159	55.140	81.563	0	4323.573	9	0.500	1	-10921639	119.268	119	108	139	11569	5.758	1.387	0.016	0.661
795	ID37967481	37967481	105	0.931	179.641	168.423	0	960.794	2	0.500	1	-10921639	120.948	120	111	143	11732	5.363	0.701	0.011	0.483
796	ID37696535	37696535	105	0.914	179.529	168.693	0	1441.191	3	0.500	1	-10921639	121.876	121	112	138	11822	6.242	1.900	0.009	0.358
797	ID37816593	37816593	105	0.968	179.573	168.158	0	1921.588	4	0.500	1	-10921639	121.577	120	112	137	11793	5.450	1.785	0.006	0.276
798	ID37753482	37753482	105	1.227	179.631	168.272	0	2401.985	5	0.500	1	-10921639	121.784	121	112	157	11813	7.076	1.808	0.008	0.272
799	ID37949040	37949040	105	0.908	179.500	168.453	0	2882.382	6	0.500	1	-10921639	120.546	119	110	135	11693	5.301	1.405	0.012	0.561
800	ID37949163	37949163	105	0.964	178.045	168.641	0	2882.382	6	0.500	1	-10921639	121.000	120	110	143	11737	6.293	1.679	0.006	0.244
801	ID37731481	37731481	105	1.333	178.038	170.192	0	3362.779	7	0.500	1	-10921639	122.979	122	110	152	11929	6.704	1.824	0.013	0.471
802	ID37882535	37882535	105	1.399	177.439	169.829	0	3843.176	8	0.500	1	-10921639	121.186	120	111	144	11755	6.480	0.460	0.013	0.470
803	ID37881392	37881392	105	1.440	176.904	170.584	0	4323.573	9	0.500	1	-10921639	122.392	121	109	141	11872	6.432	1.793	0.018	0.655
804	ID37633675	37633675	106	1.188	174.532	48.079	0	480.397	1	0.500	1	-10921639	122.959	122	112	146	11927	6.527	0.717	0.013	0.475
805	ID37923332	37923332	106	1.753	174.606	48.003	0	960.794	2	0.500	1	-10921639	124.392	123	114	150	12066	7.332	1.900	0.013	0.448
806	ID37633187	37633187	106	1.476	174.748	47.681	0	1441.191	3	0.500	1	-10921639	123.320	122	111	144	11962	6.766	0.491	0.014	0.501
807	ID37721218	37721218	106	0.890	174.841	47.763	0	1921.588	4	0.500	1	-10921639	121.680	121	108	141	11803	5.167	1.615	0.005	0.256
808	ID37668804	37668804	106	1.021	174.794	47.658	0	2401.985	5	0.500	1	-10921639	122.216	122	110	142	11855	5.993	1.798	0.012	0.501
809	ID37828219	37828219	106	0.893	173.674	47.719	0	2882.382	6	0.500	1	-10921639	121.649	121	112	154	11800	5.955	1.601	0.009	0.349
810	ID37638222	37638222	106	0.966	175.047	47.407	0	3362.779	7	0.500	1	-10921639	120.608	120	111	142	11699	6.072	0.712	0.007	0.271
811	ID37800293	37800293	106	1.050	175.321	47.707	0	3843.176	8	0.500	1	-10921639	120.000	119	107	137	11640	5.793	1.777	0.014	0.555
812	ID37804484	37804484	106	0.977	175.917	46.757	0	4323.573	9	0.500	1	-10921639	119.515	119	109	147	11593	5.752	1.780	0.008	0.313
813	ID37716048	37716048	107	1.028	90.235	146.183	0	480.397	1	0.500	1	-10921639	121.268	120	109	139	11763	6.165	1.803	0.012	0.484
814	ID37964810	37964810	107	1.135	90.570	145.187	0	960.794	2	0.500	1	-10921639	121.113	121	110	140	11748	5.822	1.397	0.011	0.461
815	ID37680856	37680856	107	1.115	87.362	147.144	0	1441.191	3	0.500	1	-10921639	123.082	123	112	144	11939	6.493	0.713	0.013	0.486
816	ID37975061	37975061	108	1.309	105.436	215.060	0	960.794	2	0.500	1	-10921639	122.454	121	108	153	11878	7.863	0.464	0.015	0.453
817	ID37731254	37731254	108	1.526	105.952	215.554	0	1441.191	3	0.500	1	-10921639	123.753	122	111	152	12004	7.243	1.900	0.013	0.424
818	ID37852273	37852273	108	0.970	105.845	214.706	0	1921.588	4	0.500	1	-10921639	122.928	122	111	143	11924	5.936	1.789	0.011	0.445
819	ID37975839	37975839	109	1.215	74.176	218.141	0	960.794	2	0.500	1	-10921639	120.546	120	109	145	11693	7.031	0.482	0.013	0.443
820	ID37730032	37730032	109	1.939	73.420	216.999	0	1441.191	3	0.500	1	-10921639	122.588	121	109	156	11891	9.036	0.704	0.016	0.425
821	ID37860108	37860108	109	1.559	73.963	217.113	0	1921.588	4	0.500	1	-10921639	121.567	120	107	148	11792	7.031	1.837	0.019	0.644
822	ID37794910	37794910	109	1.274	74.053	218.070	0	2401.985	5	0.500	1	-10921639	121.691	121	108	144	11804	6.480	1.900	0.013	0.487
823	ID37956376	37956376	109	0.982	75.412	214.764	0	2882.382	6	0.500	1	-10921639	120.598	119	105	138	11698	6.239	1.804	0.008	0.308
824	ID37774530	37774530	109	1.649	77.689	215.699	0	3362.779	7	0.500	1	-10921639	122.010	120	109	141	11835	7.123	0.704	0.019	0.653
825	ID37924790	37924790	109	1.730	78.781	214.512	0	3843.176	8	0.500	1	-10921639	121.959	121	110	142	11830	7.434	0.485	0.017	0.561
826	ID37915508	37915508	109	1.091	77.427	214.447	0	4323.573	9	0.500	1	-10921639	121.124	120	112	135	11749	5.514	0.490	0.008	0.353
827	ID37612377	37612377	110	0.894	84.248	11.193	0	480.397	1	0.500	1	-10921639	119.567	118	110	143	11598	6.029	0.779	0.012	0.455
828	ID37893404	37893404	110	0.959	84.472	13.591	0	960.794	2	0.500	1	-10921639	119.969	119	109	135	11637	5.171	1.789	0.009	0.436
829	ID37619461	37619461	110	1.116	85.290	13.343	0	1441.191	3	0.500	1	-10921639	120.072	120	111	137	11647	5.223	0.479	0.011	0.513
830	ID37695958	37695958	110	1.263	85.494	13.204	0	1921.588	4	0.500	1	-10921639	121.732	120	109	148	11808	6.672	1.832	0.017	0.618
831	ID37652492	37652492	110	1.209	87.545	13.032	0	2401.985	5	0.500	1	-10921639	122.330	121	112	153	11866	6.777	0.310	0.011	0.381
832	ID37788761	37788761	110	1.308	87.195	12.734	0	2882.382	6	0.500	1	-10921639	122.474	121	112	146	11880	6.744	1.803	0.012	0.420
833	ID37619175	37619175	110	1.278	87.369	12.676	0	3362.779	7	0.500	1	-10921639	122.010	121	111	157	11835	7.151	1.900	0.011	0.376
834	ID37768171	37768171	110	0.897	87.875	12.887	0	3843.176	8	0.500	1	-10921639	120.351	120	109	137	11674	5.113	1.389	0.012	0.578
835	ID37775449	37775449	110	0.984	87.530	13.039	0	4323.573	9	0.500	1	-10921639	120.340	120	108	142	11673	5.981	1.632	0.008	0.308
836	ID37968156	37968156	111	0.982	220.068	172.655	0	960.794	2	0.500	1	-10921639	119.773	119	108	141	11618	5.966	0.490	0.014	0.573
837	ID37700300	37700300	111	0.891	220.188	172.216	0	1441.191	3	0.500	1	-10921639	120.588	119	109	143	11697	6.759	1.827	0.005	0.161
838	ID37818417	37818417	111	0.978	220.221	171.783	0	1921.588	4	0.500	1	-10921639	120.010	119	111	139	11641	5.910	1.449	0.006	0.225
839	ID37756707	37756707	111	1.213	219.429	172.100	0	2401.985	5	0.500	1	-10921639	121.928	121	112	141	11827	6.087	0.708	0.014	0.540
840	ID37932057	37932057	111	1.100	219.327	173.153	0	2882.382	6	0.500	1	-10921639	122.072	121	110	143	11841	6.531	1.391	0.009	0.317
841	ID37737103	37737103	111	1.117	219.107	172.296	0	3362.779	7	0.500	1	-10921639	121.856	121	111	138	11820	5.766	1.592	0.014	0.576
842	ID37888836	37888836	111	1.003	219.486	172.332	0	3843.176	8	0.500	1	-10921639	121.577	121	109	140	11793	5.800	1.900	0.008	0.334
843	ID37882508	37882508	111	0.903	219.033	172.225	0	4323.573	9	0.500	1	-10921639	119.763	119	109	139	11617	5.257	1.697	0.013	0.593
844	ID37953071	37953071	112	1.082	179.456	94.485	0	960.794	2	0.500	1	-10921639	121.866	121	111	140	11821	5.820	1.794	0.010	0.407
845	ID37652522	37652522	112	1.085	179.679	94.408	0	1441.191	3	0.500	1	-10921639	119.979	119	109	148	11638	6.095	1.900	0.008	0.313
846	ID37753771	37753771	112	1.264	179.950	95.217	0	1921.588	4	0.500	1	-10921639	119.485	119	109	143	11590	6.416	1.900	0.011	0.398
847	ID37746750	37746750	113	1.406	218.145	180.653	0	480.397	1	0.500	1	-10921639	123.196	122	110	141	11950	6.611	0.495	0.016	0.575
848	ID37968684	37968684	113	1.776	218.186	179.311	0	960.794	2	0.500	1	-10921639	121.278	120	109	156	11764	7.911	0.489	0.018	0.545
849	ID37704919	37704919	113	1.841	219.003	180.482	0	1441.191	3	0.500	1	-10921639	122.856	122	110	147	11917	7.613	0.485	0.021	0.666
850	ID37824970	37824970	113	1.923	218.948	180.936	0	1921.588	4	0.500	1	-10921639	123.639	122	108	155	11993	8.688	0.482	0.013	0.357
851	ID37762605	37762605	113	1.088	218.473	180.874	0	2401.985	5	0.500	1	-10921639	121.237	120	110	138	11760	5.623	1.598	0.009	0.379
852	ID37937051	37937051	113	0.988	217.669	181.277	0	2882.382	6	0.500	1	-10921639	121.144	120	111	139	11751	5.939	1.683	0.007	0.271
853	ID37742428	37742428	113	1.149	217.749	180.949	0	3362.779	7	0.500	1	-10921639	122.804	122	112	154	11912	6.652	0.490	0.011	0.395
854	ID37890943	37890943	113	1.124	218.553	181.798	0	3843.176	8	0.500	1	-10921639	120.010	119	109	134	11641	5.715	1.766	0.013	0.546
855	ID37888441	37888441	113	1.124	219.518	184.292	0	4323.573	9	0.500	1	-10921639	120.361	119	109	138	11675	5.959	0.719	0.013	0.504
856	ID37752148	37752148	114	1.811	102.986	184.253	0	480.397	1	0.500	1	-10921639	123.052	122	111	150	11936	7.532	0.490	0.017	0.557
857	ID37970738	37970738	114	1.370	102.979	183.993	0	960.794	2	0.500	1	-10921639	122.000	122	110	155	11834	6.647	1.785	0.009	0.312
858	ID37707474	37707474	114	1.586	103.148	184.032	0	1441.191	3	0.500	1	-10921639	122.825	122	112	160	11914	7.221	1.399	0.014	0.480
859	ID37962962	37962962	115	1.157	175.126	141.108	0	960.794	2	0.500	1	-10921639	121.165	120	109	154	11753	6.905	1.900	0.005	0.158
860	ID37676767	37676767	115	0.984	175.524	141.310	0	1441.191	3	0.500	1	-10921639	120.165	119	110	148	11656	6.631	1.807	0.011	0.402
861	ID37781725	37781725	115	0.932	175.001	141.131	0	1921.588	4	0.500	1	-10921639	119.258	118	110	144	11568	5.593	1.687	0.013	0.557
862	ID37917136	37917136	115	1.264	175.773	140.970	0	2882.382	6	0.500	1	-10921639	119.340	118	110	146	11576	6.819	1.900	0.013	0.453
863	ID37706339	37706339	115	1.260	175.643	140.704	0	3362.779	7	0.500	1	-10921639	120.247	119	109	151	11664	6.564	1.816	0.012	0.429
864	ID37866379	37866379	115	1.346	175.378	140.372	0	3843.176	8	0.500	1	-10921639	119.990	118	110	143	11639	6.614	0.485	0.009	0.317
865	ID37862771	37862771	115	1.540	174.871	140.370	0	4323.573	9	0.500	1	-10921639	119.876	118	107	146	11628	7.350	0.483	0.014	0.435
866	ID37731909	37731909	116	1.058	39.502	152.371	0	480.397	1	0.500	1	-10921639	120.155	118	111	162	11655	6.900	1.900	0.012	0.426
867	ID37964503	37964503	116	1.149	39.800	151.537	0	960.794	2	0.500	1	-10921639	118.515	117	110	157	11496	6.470	1.665	0.016	0.571
868	ID37682578	37682578	116	0.998	39.750	150.830	0	1441.191	3	0.500	1	-10921639	118.546	118	108	143	11499	5.893	0.478	0.009	0.353
869	ID37771212	37771212	117	1.225	78.546	208.706	0	480.397	1	0.500	1	-10921639	120.938	119	110	146	11731	6.761	0.718	0.014	0.477
870	ID37974766	37974766	117	1.126	79.042	208.525	0	960.794	2	0.500	1	-10921639	121.268	121	109	139	11763	5.478	0.490	0.006	0.258
871	ID37724185	37724185	117	1.501	78.384	208.808	0	1441.191	3	0.500	1	-10921639	122.866	122	110	152	11918	6.634	0.486	0.012	0.427
872	ID37857475	37857475	117	1.339	78.986	209.206	0	1921.588	4	0.500	1	-10921639	121.433	120	111	143	11779	6.218	0.712	0.016	0.610
873	ID37781158	37781158	117	1.706	78.938	208.907	0	2401.985	5	0.500	1	-10921639	122.474	121	109	141	11880	7.468	0.489	0.012	0.393
874	ID37953039	37953039	117	1.475	78.212	208.325	0	2882.382	6	0.500	1	-10921639	122.485	122	112	142	11881	6.415	0.479	0.012	0.437
875	ID37768829	37768829	117	1.306	78.365	208.756	0	3362.779	7	0.500	1	-10921639	121.258	120	111	178	11762	8.191	0.708	0.016	0.463
876	ID37914874	37914874	118	1.127	133.331	37.113	0	960.794	2	0.500	1	-10921639	121.546	121	113	141	11790	5.993	1.900	0.011	0.461
877	ID37628657	37628657	118	1.478	133.589	37.520	0	1441.191	3	0.500	1	-10921639	123.464	122	112	146	11976	6.173	0.711	0.015	0.607
878	ID37718676	37718676	118	1.726	133.653	37.429	0	1921.588	4	0.500	1	-10921639	123.423	122	112	150	11972	7.124	1.789	0.020	0.691
879	ID37667612	37667612	118	1.756	133.518	37.593	0	2401.985	5	0.500	1	-10921639	124.309	123	112	144	12058	6.698	1.589	0.021	0.750
880	ID37976207	37976207	119	0.979	213.952	218.752	0	960.794	2	0.500	1	-10921639	120.711	119	110	142	11709	6.761	0.497	0.016	0.554
881	ID37732381	37732381	119	1.377	214.106	218.612	0	1441.191	3	0.500	1	-10921639	122.443	122	109	144	11877	6.338	1.900	0.014	0.532
882	ID37861451	37861451	119	1.623	214.032	218.623	0	1921.588	4	0.500	1	-10921639	123.227	122	106	151	11953	7.819	1.900	0.017	0.513
883	ID37792509	37792509	119	1.073	214.202	218.515	0	2401.985	5	0.500	1	-10921639	122.072	121	112	146	11841	5.960	0.709	0.009	0.384
884	ID37957550	37957550	119	1.095	213.668	218.390	0	2882.382	6	0.500	1	-10921639	121.959	122	111	139	11830	5.928	0.710	0.012	0.481
885	ID37778662	37778662	119	0.925	213.906	218.787	0	3362.779	7	0.500	1	-10921639	121.825	120	109	150	11817	6.871	1.397	0.004	0.156
886	ID37705325	37705325	120	1.293	213.601	138.865	0	480.397	1	0.500	1	-10921639	122.268	120	109	140	11860	6.956	1.685	0.011	0.367
887	ID37963404	37963404	120	1.551	213.945	138.893	0	960.794	2	0.500	1	-10921639	123.536	122	109	149	11983	7.462	0.705	0.021	0.670
888	ID37675858	37675858	120	1.155	214.631	139.844	0	1441.191	3	0.500	1	-10921639	119.186	118	107	136	11561	5.828	1.900	0.013	0.540
889	ID37788847	37788847	120	1.469	214.682	139.565	0	1921.588	4	0.500	1	-10921639	120.381	118	107	141	11677	7.081	1.620	0.018	0.604
890	ID37910602	37910602	120	1.642	214.492	139.806	0	2882.382	6	0.500	1	-10921639	121.010	119	105	151	11738	7.838	1.900	0.024	0.712
891	ID37714126	37714126	120	0.960	213.956	139.321	0	3362.779	7	0.500	1	-10921639	119.959	119	109	146	11636	5.946	1.496	0.010	0.402
892	ID37643858	37643858	121	0.955	179.918	65.772	0	480.397	1	0.500	1	-10921639	121.691	122	109	137	11804	5.817	1.900	0.009	0.389
893	ID37934995	37934995	121	1.121	179.790	64.738	0	960.794	2	0.500	1	-10921639	120.639	119	109	152	11702	6.947	1.792	0.015	0.498
894	ID37639743	37639743	121	0.914	179.785	65.848	0	1441.191	3	0.500	1	-10921639	122.103	122	110	136	11844	5.384	1.395	0.010	0.450
895	ID37734220	37734220	121	0.910	179.636	64.412	0	1921.588	4	0.500	1	-10921639	121.010	121	112	141	11738	5.977	0.462	0.005	0.205
896	ID37683429	37683429	121	0.909	178.874	65.042	0	2401.985	5	0.500	1	-10921639	120.835	120	111	141	11721	5.629	0.492	0.009	0.389
897	ID37851362	37851362	121	1.442	179.436	66.287	0	2882.382	6	0.500	1	-10921639	121.320	120	110	154	11768	7.509	1.819	0.015	0.485
898	ID37648935	37648935	121	1.475	179.641	66.433	0	3362.779	7	0.500	1	-10921639	121.845	120	112	159	11819	7.350	0.491	0.015	0.504
899	ID37812393	37812393	121	1.512	179.179	65.114	0	3843.176	8	0.500	1	-10921639	122.268	121	111	146	11860	7.221	0.481	0.014	0.453
900	ID37815582	37815582	121	1.687	177.808	63.969	0	4323.573	9	0.500	1	-10921639	122.598	121	108	155	11892	7.490	0.482	0.016	0.523
901	ID37973904	37973904	122	1.007	127.404	209.643	0	960.794	2	0.500	1	-10921639	120.082	119	111	144	11648	5.921	0.704	0.011	0.448
902	ID37724048	37724048	122	1.370	127.935	208.518	0	1441.191	3	0.500	1	-10921639	121.722	120	109	144	11807	6.899	1.900	0.010	0.358
903	ID37850917	37850917	122	1.015	129.954	208.199	0	1921.588	4	0.500	1	-10921639	120.505	119	113	139	11689	5.284	1.581	0.008	0.379
904	ID37952972	37952972	122	1.076	128.691	208.123	0	2882.382	6	0.500	1	-10921639	121.959	121	110	139	11830	6.295	1.900	0.009	0.340
905	ID37768455	37768455	122	1.484	129.213	208.262	0	3362.779	7	0.500	1	-10921639	123.907	122	112	146	12019	7.323	0.492	0.014	0.475
906	ID37682499	37682499	123	0.923	209.279	107.189	0	480.397	1	0.500	1	-10921639	118.485	118	106	146	11493	6.616	1.900	0.009	0.316
907	ID37958046	37958046	123	1.147	208.641	108.052	0	960.794	2	0.500	1	-10921639	119.021	117	109	144	11545	6.801	0.479	0.014	0.491
908	ID37659811	37659811	123	1.115	208.659	108.033	0	1441.191	3	0.500	1	-10921639	118.979	117	109	144	11541	6.753	0.487	0.011	0.399
909	ID37756692	37756692	123	1.304	208.238	107.776	0	1921.588	4	0.500	1	-10921639	119.443	118	107	144	11586	7.271	1.614	0.013	0.429
910	ID37710852	37710852	123	1.880	207.742	108.604	0	2401.985	5	0.500	1	-10921639	120.588	119	108	150	11697	8.449	0.704	0.028	0.767
911	ID37887094	37887094	123	1.520	208.084	109.221	0	2882.382	6	0.500	1	-10921639	120.474	119	110	143	11686	6.508	0.478	0.011	0.413
912	ID37687930	37687930	123	1.552	207.720	108.062	0	3362.779	7	0.500	1	-10921639	120.113	119	109	142	11651	6.920	1.398	0.011	0.393
913	ID37841287	37841287	123	1.399	207.699	107.765	0	3843.176	8	0.500	1	-10921639	119.216	119	108	146	11564	6.455	1.900	0.016	0.581
914	ID37648981	37648981	124	1.120	177.119	76.678	0	480.397	1	0.500	1	-10921639	121.361	120	109	145	11772	6.290	1.621	0.010	0.375
915	ID37945501	37945501	124	1.317	176.590	75.647	0	960.794	2	0.500	1	-10921639	121.289	120	109	155	11765	7.875	1.403	0.014	0.413
916	ID37643637	37643637	124	1.198	176.943	76.429	0	1441.191	3	0.500	1	-10921639	120.361	119	108	148	11675	6.730	0.711	0.010	0.356
917	ID37742906	37742906	124	1.142	176.930	75.801	0	1921.588	4	0.500	1	-10921639	120.392	119	110	143	11678	6.291	1.592	0.016	0.596
918	ID37777026	37777026	125	0.996	74.000	205.476	0	480.397	1	0.500	1	-10921639	122.052	122	111	138	11839	5.449	1.900	0.007	0.311
919	ID37973418	37973418	125	1.058	74.051	205.097	0	960.794	2	0.500	1	-10921639	121.742	121	111	142	11809	5.828	0.484	0.008	0.342
920	ID37722866	37722866	125	1.160	74.479	205.349	0	1441.191	3	0.500	1	-10921639	123.588	123	111	143	11988	6.383	1.779	0.011	0.433
921	ID37848188	37848188	125	1.661	74.950	205.406	0	1921.588	4	0.500	1	-10921639	124.258	123	114	146	12053	6.795	0.711	0.019	0.679
922	ID37786817	37786817	125	1.207	74.692	204.757	0	2401.985	5	0.500	1	-10921639	122.897	122	111	146	11921	6.550	0.485	0.011	0.415
923	ID37954402	37954402	125	1.313	74.240	204.981	0	2882.382	6	0.500	1	-10921639	123.186	122	111	148	11949	6.818	1.900	0.015	0.525
924	ID37759490	37759490	125	1.195	76.558	204.000	0	3362.779	7	0.500	1	-10921639	122.639	121	111	142	11896	6.652	1.720	0.006	0.220
925	ID37917701	37917701	125	1.274	76.574	203.709	0	3843.176	8	0.500	1	-10921639	122.392	121	112	145	11872	7.078	1.900	0.015	0.515
926	ID37906042	37906042	125	1.475	75.983	203.579	0	4323.573	9	0.500	1	-10921639	122.340	121	113	166	11867	8.038	0.485	0.018	0.531
927	ID37942445	37942445	126	1.337	55.745	77.275	0	960.794	2	0.500	1	-10921639	120.588	119	109	143	11697	6.352	1.685	0.014	0.514
928	ID37644707	37644707	126	1.132	56.231	77.539	0	1441.191	3	0.500	1	-10921639	119.423	118	111	147	11584	5.916	1.900	0.009	0.367
929	ID37742224	37742224	126	0.901	55.406	77.760	0	1921.588	4	0.500	1	-10921639	119.691	118	110	139	11610	5.583	1.900	0.011	0.463
930	ID37687933	37687933	126	0.932	55.759	77.853	0	2401.985	5	0.500	1	-10921639	119.835	119	109	139	11624	5.467	1.900	0.012	0.532
931	ID37683476	37683476	127	1.236	18.363	108.125	0	480.397	1	0.500	1	-10921639	117.526	116	108	138	11400	6.132	0.475	0.013	0.482
932	ID37958250	37958250	127	1.143	18.426	107.740	0	960.794	2	0.500	1	-10921639	117.732	116	107	146	11420	5.841	1.781	0.011	0.431
933	ID37777713	37777713	128	1.206	206.000	207.720	0	480.397	1	0.500	1	-10921639	119.474	119	106	140	11589	6.627	0.477	0.012	0.427
934	ID37974670	37974670	128	1.206	206.497	207.852	0	960.794	2	0.500	1	-10921639	120.680	119	110	144	11706	6.449	0.485	0.009	0.316
935	ID37857524	37857524	128	1.637	207.237	209.163	0	1921.588	4	0.500	1	-10921639	121.711	120	108	150	11806	7.738	0.708	0.014	0.429
936	ID37781107	37781107	128	1.371	206.642	208.732	0	2401.985	5	0.500	1	-10921639	121.876	120	111	145	11822	6.704	1.900	0.016	0.568
937	ID37953050	37953050	128	1.412	206.211	208.353	0	2882.382	6	0.500	1	-10921639	122.186	121	110	151	11852	6.715	0.709	0.013	0.453
938	ID37769055	37769055	128	1.058	206.044	208.828	0	3362.779	7	0.500	1	-10921639	121.588	121	111	148	11794	6.840	0.702	0.014	0.483
939	ID37915295	37915295	128	1.196	206.208	208.991	0	3843.176	8	0.500	1	-10921639	121.320	120	108	149	11768	6.894	1.900	0.014	0.481
940	ID37910925	37910925	128	0.975	205.565	209.229	0	4323.573	9	0.500	1	-10921639	121.309	120	111	151	11767	6.202	0.485	0.008	0.303
941	ID37767657	37767657	129	0.988	213.945	202.672	0	480.397	1	0.500	1	-10921639	120.897	121	109	146	11727	5.478	0.484	0.009	0.379
942	ID37973136	37973136	129	0.951	213.464	203.299	0	960.794	2	0.500	1	-10921639	122.041	121	111	146	11838	6.193	0.495	0.004	0.174
943	ID37624837	37624837	130	1.239	164.714	28.782	0	1441.191	3	0.500	1	-10921639	121.134	120	111	144	11750	6.219	1.900	0.009	0.337
944	ID37715005	37715005	130	1.516	165.955	27.533	0	1921.588	4	0.500	1	-10921639	121.660	119	112	149	11801	7.159	1.706	0.012	0.416
945	ID37660319	37660319	130	1.277	166.798	26.612	0	2401.985	5	0.500	1	-10921639	121.093	120	109	139	11746	5.991	0.711	0.010	0.403
946	ID37812298	37812298	130	1.171	166.591	26.449	0	2882.382	6	0.500	1	-10921639	120.742	120	110	140	11712	5.888	1.696	0.009	0.375
947	ID37627392	37627392	130	1.208	166.062	27.334	0	3362.779	7	0.500	1	-10921639	121.433	121	110	137	11779	6.300	1.900	0.012	0.460
948	ID37783441	37783441	130	1.266	167.130	27.519	0	3843.176	8	0.500	1	-10921639	121.649	121	106	146	11800	6.690	1.900	0.012	0.423
949	ID37790012	37790012	130	1.235	166.365	26.945	0	4323.573	9	0.500	1	-10921639	121.165	120	112	142	11753	6.013	1.784	0.010	0.408
950	ID37662118	37662118	131	1.637	52.690	112.550	0	1441.191	3	0.500	1	-10921639	122.268	121	108	144	11860	6.915	0.484	0.017	0.591
951	ID37764172	37764172	131	1.819	52.111	112.661	0	1921.588	4	0.500	1	-10921639	122.505	122	107	142	11883	7.680	0.483	0.020	0.619
952	ID37711862	37711862	131	1.669	51.742	112.771	0	2401.985	5	0.500	1	-10921639	121.959	120	110	145	11830	6.875	0.486	0.021	0.737
953	ID37883973	37883973	131	2.029	51.768	113.060	0	2882.382	6	0.500	1	-10921639	123.402	121	110	159	11970	8.720	0.718	0.025	0.681
954	ID37680877	37680877	131	1.733	52.555	113.623	0	3362.779	7	0.500	1	-10921639	120.784	118	109	158	11716	8.026	1.833	0.018	0.525
955	ID37846841	37846841	131	0.913	52.417	113.519	0	3843.176	8	0.500	1	-10921639	118.753	119	107	137	11519	5.757	1.801	0.008	0.323
956	ID37852076	37852076	131	0.888	51.642	113.233	0	4323.573	9	0.500	1	-10921639	118.608	118	109	139	11505	5.537	1.767	0.012	0.490
957	ID37698098	37698098	132	0.903	139.634	4.336	0	1921.588	4	0.500	1	-10921639	122.155	121	110	144	11849	5.606	1.592	0.003	0.136
958	ID37649543	37649543	132	1.068	139.641	4.446	0	2401.985	5	0.500	1	-10921639	122.289	122	111	143	11862	5.939	1.900	0.007	0.289
959	ID37782937	37782937	132	0.921	139.398	4.200	0	2882.382	6	0.500	1	-10921639	122.773	121	113	144	11909	5.722	0.706	0.007	0.279
960	ID37657264	37657264	133	1.103	210.530	103.487	0	1441.191	3	0.500	1	-10921639	119.536	119	110	139	11595	5.532	0.494	0.012	0.517
961	ID37757774	37757774	133	1.165	210.630	103.367	0	1921.588	4	0.500	1	-10921639	120.010	119	107	138	11641	5.444	1.721	0.012	0.527
962	ID37709429	37709429	133	1.480	210.825	103.473	0	2401.985	5	0.500	1	-10921639	121.474	120	111	140	11783	6.298	1.792	0.017	0.631
963	ID37879278	37879278	133	1.041	210.678	103.294	0	2882.382	6	0.500	1	-10921639	120.165	120	109	140	11656	5.907	1.728	0.013	0.542
964	ID37678144	37678144	133	1.570	211.276	103.534	0	3362.779	7	0.500	1	-10921639	119.969	119	109	142	11637	6.599	0.720	0.022	0.769
965	ID37826908	37826908	134	1.135	220.672	183.048	0	1921.588	4	0.500	1	-10921639	123.124	122	110	150	11943	7.856	1.900	0.007	0.207
966	ID37758387	37758387	134	1.150	221.445	183.197	0	2401.985	5	0.500	1	-10921639	121.969	120	110	151	11831	7.644	1.900	0.012	0.379
967	ID37941403	37941403	134	1.291	221.758	183.625	0	2882.382	6	0.500	1	-10921639	112.505	117	47	148	10913	20.221	1.795	0.045	0.475
968	ID37744528	37744528	134	1.368	220.920	183.618	0	3362.779	7	0.500	1	-10921639	121.711	121	109	150	11806	7.503	1.590	0.013	0.409
969	ID37674989	37674989	135	1.315	109.822	136.788	0	1441.191	3	0.500	1	-10921639	121.680	121	112	146	11803	5.936	0.490	0.015	0.608
970	ID37785964	37785964	135	1.255	109.411	136.851	0	1921.588	4	0.500	1	-10921639	121.113	121	110	144	11748	6.556	1.687	0.011	0.399
971	ID37736132	37736132	135	1.223	109.633	136.970	0	2401.985	5	0.500	1	-10921639	121.464	120	111	145	11782	6.035	0.491	0.011	0.432
972	ID37621847	37621847	136	1.275	14.452	17.926	0	1441.191	3	0.500	1	-10921639	123.464	122	111	156	11976	7.009	0.484	0.015	0.504
973	ID37703437	37703437	136	1.583	15.445	17.093	0	1921.588	4	0.500	1	-10921639	122.979	121	109	149	11929	7.908	0.483	0.016	0.494
974	ID37658500	37658500	136	1.885	16.338	18.655	0	2401.985	5	0.500	1	-10921639	123.629	121	112	154	11992	8.235	1.900	0.019	0.571
975	ID37800430	37800430	136	2.050	16.121	18.850	0	2882.382	6	0.500	1	-10921639	124.536	123	113	151	12080	7.810	0.473	0.023	0.718
976	ID37718643	37718643	137	1.346	70.022	37.510	0	1921.588	4	0.500	1	-10921639	122.062	121	111	148	11840	6.390	0.493	0.014	0.513
977	ID37662054	37662054	137	1.035	69.697	37.401	0	2401.985	5	0.500	1	-10921639	121.948	121	110	138	11829	5.595	1.406	0.009	0.387
978	ID37816987	37816987	137	1.419	69.480	37.571	0	2882.382	6	0.500	1	-10921639	122.907	122	111	160	11922	7.182	1.900	0.014	0.484
979	ID37632011	37632011	137	0.977	70.095	37.507	0	3362.779	7	0.500	1	-10921639	121.546	121	111	141	11790	5.646	0.706	0.006	0.255
980	ID37788198	37788198	137	1.322	69.250	37.591	0	3843.176	8	0.500	1	-10921639	122.227	121	109	144	11856	6.140	1.598	0.010	0.386
981	ID37661003	37661003	138	1.054	23.733	110.393	0	1441.191	3	0.500	1	-10921639	120.598	120	109	134	11698	5.163	1.383	0.008	0.358
982	ID37763345	37763345	138	1.185	23.303	111.347	0	1921.588	4	0.500	1	-10921639	119.495	118	108	139	11591	6.097	0.451	0.011	0.421
983	ID37712937	37712937	138	1.122	23.400	111.111	0	2401.985	5	0.500	1	-10921639	119.598	118	110	151	11601	6.420	1.900	0.014	0.521
984	ID37682856	37682856	138	1.118	22.860	111.726	0	3362.779	7	0.500	1	-10921639	120.278	119	110	137	11667	5.907	1.727	0.015	0.622
985	ID37848820	37848820	138	1.571	22.162	111.716	0	3843.176	8	0.500	1	-10921639	120.381	119	109	145	11677	7.060	0.707	0.014	0.459
986	ID37727519	37727519	139	1.416	214.452	211.947	0	1441.191	3	0.500	1	-10921639	123.103	122	111	145	11941	6.234	1.793	0.012	0.475
987	ID37859375	37859375	139	1.164	214.244	211.540	0	1921.588	4	0.500	1	-10921639	122.072	121	111	139	11841	5.899	0.493	0.011	0.460
988	ID37790769	37790769	139	1.102	213.766	211.879	0	2401.985	5	0.500	1	-10921639	122.010	121	110	141	11835	5.693	1.848	0.011	0.447
989	ID37955633	37955633	139	1.254	213.512	212.166	0	2882.382	6	0.500	1	-10921639	122.928	122	111	147	11924	6.468	0.493	0.008	0.293
990	ID37771497	37771497	139	1.525	213.645	212.729	0	3362.779	7	0.500	1	-10921639	123.557	123	111	150	11985	6.727	1.803	0.014	0.502
991	ID37926229	37926229	139	1.103	214.020	212.841	0	3843.176	8	0.500	1	-10921639	121.505	121	105	137	11786	6.255	1.622	0.013	0.509
992	ID37914411	37914411	139	1.019	213.794	213.047	0	4323.573	9	0.500	1	-10921639	121.258	121	111	141	11762	5.727	0.702	0.012	0.482
993	ID37617502	37617502	140	1.409	84.221	11.123	0	1441.191	3	0.500	1	-10921639	122.711	123	111	145	11903	6.385	0.710	0.020	0.766
994	ID37693113	37693113	140	1.432	84.121	11.032	0	1921.588	4	0.500	1	-10921639	122.928	122	114	149	11924	6.310	0.490	0.011	0.430
995	ID37650522	37650522	140	1.471	83.925	11.028	0	2401.985	5	0.500	1	-10921639	123.990	123	111	144	12027	6.903	0.709	0.014	0.511
996	ID37797402	37797402	140	0.920	83.689	11.154	0	2882.382	6	0.500	1	-10921639	122.134	121	113	137	11847	5.673	0.493	0.008	0.326
997	ID37617664	37617664	140	1.103	83.049	11.471	0	3362.779	7	0.500	1	-10921639	120.237	119	109	144	11663	6.289	1.768	0.016	0.589
998	ID37616145	37616145	141	1.216	16.718	4.595	0	1441.191	3	0.500	1	-10921639	121.835	120	111	143	11818	6.547	0.701	0.012	0.444
999	ID37697976	37697976	141	1.282	16.331	4.237	0	1921.588	4	0.500	1	-10921639	121.021	120	108	138	11739	6.296	1.900	0.012	0.468
1000	ID37647683	37647683	141	1.405	16.196	3.872	0	2401.985	5	0.500	1	-10921639	123.021	123	111	141	11933	6.374	0.900	0.015	0.558
1001	ID37787451	37787451	141	0.998	17.722	1.943	0	2882.382	6	0.500	1	-10921639	120.619	120	111	139	11700	5.409	0.466	0.014	0.636
1002	ID37649931	37649931	142	1.326	173.283	89.716	0	1441.191	3	0.500	1	-10921639	120.649	119	110	152	11703	7.056	1.900	0.011	0.365
1003	ID37746868	37746868	142	0.926	173.496	88.913	0	1921.588	4	0.500	1	-10921639	118.845	117	109	140	11528	5.846	1.787	0.010	0.413
1004	ID37691204	37691204	142	0.916	173.515	89.024	0	2401.985	5	0.500	1	-10921639	118.402	118	108	140	11485	5.695	1.900	0.014	0.572
1005	ID37873856	37873856	142	0.974	173.408	88.899	0	2882.382	6	0.500	1	-10921639	119.010	118	111	140	11544	5.954	1.900	0.007	0.272
1006	ID37667218	37667218	142	1.021	173.052	89.016	0	3362.779	7	0.500	1	-10921639	118.619	118	109	135	11506	5.969	1.447	0.015	0.582
1007	ID37830673	37830673	142	1.204	172.897	89.515	0	3843.176	8	0.500	1	-10921639	120.062	120	107	138	11646	6.211	0.481	0.014	0.550
1008	ID37637098	37637098	143	1.033	187.690	59.165	0	1441.191	3	0.500	1	-10921639	121.866	121	112	136	11821	5.597	0.708	0.009	0.391
1009	ID37729714	37729714	143	1.126	187.864	58.677	0	1921.588	4	0.500	1	-10921639	120.814	120	111	135	11719	5.648	0.480	0.013	0.562
1010	ID37681750	37681750	143	1.147	188.244	59.037	0	2401.985	5	0.500	1	-10921639	121.206	121	112	142	11757	5.397	0.484	0.009	0.415
1011	ID37846979	37846979	143	1.407	187.601	58.827	0	2882.382	6	0.500	1	-10921639	122.258	122	109	140	11859	6.121	0.492	0.013	0.503
1012	ID37643364	37643364	143	1.491	190.424	59.585	0	3362.779	7	0.500	1	-10921639	120.856	119	108	144	11723	7.364	1.900	0.013	0.417
1013	ID37675778	37675778	144	1.279	202.368	139.392	0	1441.191	3	0.500	1	-10921639	120.515	119	111	143	11690	6.290	1.614	0.012	0.440
1014	ID37785069	37785069	144	1.141	202.061	139.139	0	1921.588	4	0.500	1	-10921639	119.227	118	107	137	11565	6.030	0.713	0.016	0.612
1015	ID37734868	37734868	144	1.401	202.747	139.282	0	2401.985	5	0.500	1	-10921639	120.021	118	110	143	11642	6.630	0.484	0.009	0.326
1016	ID37909902	37909902	144	1.355	202.236	139.296	0	2882.382	6	0.500	1	-10921639	120.773	120	108	143	11715	6.165	0.481	0.010	0.403
1017	ID37713737	37713737	144	0.930	202.545	138.855	0	3362.779	7	0.500	1	-10921639	120.124	119	111	138	11652	5.306	1.398	0.010	0.447
1018	ID37848574	37848574	145	0.962	214.337	205.764	0	1921.588	4	0.500	1	-10921639	120.247	120	109	144	11664	5.777	0.495	0.011	0.463
1019	ID37778392	37778392	145	1.486	214.666	206.296	0	2401.985	5	0.500	1	-10921639	120.474	119	108	144	11686	7.555	1.636	0.021	0.658
1020	ID37953846	37953846	145	1.567	214.117	206.119	0	2882.382	6	0.500	1	-10921639	122.454	121	107	161	11878	7.478	1.799	0.016	0.514
1021	ID37762231	37762231	145	1.386	214.729	206.270	0	3362.779	7	0.500	1	-10921639	120.990	119	108	150	11736	6.989	0.479	0.017	0.591
1022	ID37719077	37719077	146	1.978	183.567	200.132	0	1441.191	3	0.500	1	-10921639	125.680	125	113	150	12191	7.827	0.487	0.017	0.548
1023	ID37840514	37840514	146	2.097	182.787	199.680	0	1921.588	4	0.500	1	-10921639	125.536	123	112	149	12177	8.761	0.488	0.016	0.453
1024	ID37769422	37769422	146	1.289	182.159	199.037	0	2401.985	5	0.500	1	-10921639	123.134	122	112	144	11944	6.667	1.900	0.010	0.358
1025	ID37950883	37950883	146	2.321	182.411	199.792	0	2882.382	6	0.500	1	-10921639	126.443	124	115	155	12265	8.480	0.489	0.021	0.612
1026	ID37763520	37763520	146	2.019	182.100	200.092	0	3362.779	7	0.500	1	-10921639	124.969	123	113	154	12122	8.621	1.900	0.022	0.626
1027	ID37911497	37911497	146	2.489	181.172	200.095	0	3843.176	8	0.500	1	-10921639	125.505	123	112	161	12174	9.351	0.492	0.019	0.512
1028	ID37908046	37908046	146	1.623	181.533	201.031	0	4323.573	9	0.500	1	-10921639	122.402	122	110	149	11873	7.290	0.481	0.015	0.486
1029	ID37747963	37747963	147	1.303	180.439	78.208	0	1921.588	4	0.500	1	-10921639	119.845	119	108	142	11625	6.361	1.782	0.016	0.599
1030	ID37687750	37687750	147	1.276	181.106	77.318	0	2401.985	5	0.500	1	-10921639	118.918	118	109	152	11535	6.543	0.709	0.009	0.337
1031	ID37857102	37857102	147	1.349	180.118	78.298	0	2882.382	6	0.500	1	-10921639	119.649	118	110	151	11606	7.068	1.900	0.016	0.537
1032	ID37655085	37655085	147	1.277	179.819	77.687	0	3362.779	7	0.500	1	-10921639	119.907	119	108	153	11631	6.778	1.728	0.017	0.592
1033	ID37823407	37823407	147	1.102	179.737	78.216	0	3843.176	8	0.500	1	-10921639	119.649	119	110	146	11606	5.609	1.900	0.007	0.294
1034	ID37829039	37829039	147	1.080	180.524	78.589	0	4323.573	9	0.500	1	-10921639	119.000	118	109	136	11543	6.328	1.606	0.013	0.485
1035	ID37724388	37724388	148	1.521	212.356	209.025	0	1441.191	3	0.500	1	-10921639	122.031	120	107	160	11837	7.935	0.484	0.016	0.499
1036	ID37856900	37856900	148	1.426	212.312	208.508	0	1921.588	4	0.500	1	-10921639	122.474	122	109	140	11880	6.107	1.788	0.016	0.633
1037	ID37781517	37781517	148	0.950	212.579	209.148	0	2401.985	5	0.500	1	-10921639	122.082	121	111	140	11842	5.999	0.726	0.009	0.359
1038	ID37954692	37954692	148	1.031	212.483	209.165	0	2882.382	6	0.500	1	-10921639	122.052	121	111	153	11839	6.343	0.494	0.010	0.397
1039	ID37769920	37769920	148	0.962	211.932	209.757	0	3362.779	7	0.500	1	-10921639	120.567	120	108	144	11695	5.895	1.673	0.012	0.502
1040	ID37769369	37769369	148	0.885	212.704	209.201	0	3362.779	7	0.500	1	-10921639	121.289	121	110	142	11765	5.831	0.705	0.012	0.478
1041	ID37922251	37922251	148	1.470	212.548	210.217	0	3843.176	8	0.500	1	-10921639	122.474	120	111	177	11880	8.763	1.680	0.010	0.274
1042	ID37911415	37911415	148	1.028	212.679	209.720	0	4323.573	9	0.500	1	-10921639	121.381	120	111	147	11774	6.446	1.710	0.006	0.242
1043	ID37751955	37751955	149	0.970	158.271	90.402	0	1921.588	4	0.500	1	-10921639	121.216	121	112	142	11758	5.378	1.384	0.008	0.346
1044	ID37697581	37697581	149	1.336	157.924	91.143	0	2401.985	5	0.500	1	-10921639	123.041	122	110	142	11935	6.380	1.694	0.010	0.398
1045	ID37868406	37868406	149	1.366	157.559	91.403	0	2882.382	6	0.500	1	-10921639	122.031	121	109	142	11837	6.566	1.788	0.016	0.576
1046	ID37666378	37666378	149	1.710	157.717	91.071	0	3362.779	7	0.500	1	-10921639	122.814	121	110	141	11913	7.289	1.776	0.019	0.636
1047	ID37832873	37832873	149	1.109	157.721	91.364	0	3843.176	8	0.500	1	-10921639	121.959	121	110	141	11830	6.537	1.900	0.012	0.447
1048	ID37830289	37830289	149	1.213	157.259	91.251	0	4323.573	9	0.500	1	-10921639	121.464	121	107	149	11782	6.856	0.704	0.019	0.672
1049	ID37785496	37785496	150	1.309	213.944	136.015	0	1921.588	4	0.500	1	-10921639	121.093	120	112	164	11746	7.768	1.594	0.021	0.651
1050	ID37728389	37728389	150	1.395	212.531	135.212	0	2401.985	5	0.500	1	-10921639	119.845	118	109	143	11625	6.792	0.472	0.013	0.445
1051	ID37908892	37908892	150	1.199	214.301	135.100	0	2882.382	6	0.500	1	-10921639	120.845	120	110	140	11722	6.214	0.491	0.017	0.665
1052	ID37701335	37701335	150	1.439	214.137	135.398	0	3362.779	7	0.500	1	-10921639	121.526	120	109	163	11788	8.205	1.900	0.017	0.491
1053	ID37861070	37861070	150	1.434	214.243	135.533	0	3843.176	8	0.500	1	-10921639	121.454	121	109	157	11781	7.289	1.588	0.009	0.302
1054	ID37860965	37860965	150	1.003	214.201	135.360	0	4323.573	9	0.500	1	-10921639	119.948	118	108	158	11635	7.568	1.172	0.005	0.149
1055	ID37674747	37674747	151	0.910	216.477	136.143	0	1441.191	3	0.500	1	-10921639	119.804	119	110	139	11621	5.528	1.590	0.009	0.397
1056	ID37785264	37785264	151	1.304	218.755	135.847	0	1921.588	4	0.500	1	-10921639	119.670	119	108	139	11608	6.339	1.900	0.012	0.438
1057	ID37736082	37736082	151	1.222	219.028	136.628	0	2401.985	5	0.500	1	-10921639	118.773	118	108	136	11521	6.180	0.705	0.012	0.460
1058	ID37912750	37912750	151	1.190	217.405	136.162	0	2882.382	6	0.500	1	-10921639	119.124	118	107	139	11555	6.183	1.900	0.013	0.482
1059	ID37667108	37667108	152	2.221	221.758	121.875	0	1441.191	3	0.500	1	-10921639	113.588	118	46	153	11018	21.590	1.790	0.067	0.662
1060	ID37767288	37767288	152	1.583	221.758	121.442	0	1921.588	4	0.500	1	-10921639	109.237	114	46	143	10596	20.103	1.782	0.055	0.571
1061	ID37649682	37649682	153	1.198	68.315	89.140	0	1441.191	3	0.500	1	-10921639	122.402	122	110	140	11873	5.698	1.900	0.010	0.409
1062	ID37747526	37747526	153	1.507	67.680	89.429	0	1921.588	4	0.500	1	-10921639	122.186	121	112	150	11852	7.167	0.709	0.013	0.440
1063	ID37729435	37729435	154	1.102	77.078	214.736	0	1441.191	3	0.500	1	-10921639	123.237	122	111	164	11954	6.487	1.900	0.007	0.257
1064	ID37852514	37852514	154	0.932	76.193	214.941	0	1921.588	4	0.500	1	-10921639	121.928	122	109	138	11827	5.692	1.416	0.007	0.301
1065	ID37914699	37914699	155	1.079	88.021	148.329	0	2882.382	6	0.500	1	-10921639	122.371	121	109	146	11870	6.184	1.783	0.005	0.181
1066	ID37712274	37712274	155	1.059	87.844	148.463	0	3362.779	7	0.500	1	-10921639	122.381	121	112	143	11871	5.774	1.900	0.009	0.381
1067	ID37872145	37872145	155	1.029	87.475	148.341	0	3843.176	8	0.500	1	-10921639	121.454	121	113	135	11781	5.064	0.709	0.009	0.435
1068	ID37872353	37872353	155	1.784	87.986	149.050	0	4323.573	9	0.500	1	-10921639	123.361	122	109	172	11966	8.264	0.491	0.012	0.355
1069	ID37804396	37804396	156	4.046	136.484	9.660	0	2882.382	6	0.500	1	-10921639	150.155	150	126	179	14565	12.914	0.713	0.031	0.709
1070	ID37616654	37616654	156	4.303	136.567	9.680	0	3362.779	7	0.500	1	-10921639	149.443	148	120	186	14496	14.286	0.713	0.035	0.699
1071	ID37751912	37751912	156	3.943	136.512	9.927	0	3843.176	8	0.500	1	-10921639	152.010	151	129	179	14745	10.834	0.715	0.026	0.700
1072	ID37752414	37752414	156	0.997	135.321	10.599	0	3843.176	8	0.500	1	-10921639	130.959	129	117	161	12703	8.139	1.900	0.003	0.091
1073	ID37774757	37774757	156	0.925	134.941	10.635	0	4323.573	9	0.500	1	-10921639	131.526	130	120	148	12758	6.969	1.900	0.013	0.470
1074	ID37774331	37774331	156	4.686	136.088	10.017	0	4323.573	9	0.500	1	-10921639	155.082	157	132	197	15043	12.647	0.714	0.031	0.738
1075	ID37865849	37865849	157	1.007	60.233	80.525	0	2882.382	6	0.500	1	-10921639	120.134	119	109	146	11653	5.421	0.482	0.012	0.545
1076	ID37659298	37659298	157	1.110	58.591	80.012	0	3362.779	7	0.500	1	-10921639	120.454	119	109	139	11684	5.721	1.900	0.010	0.423
1077	ID37825261	37825261	157	1.270	59.097	79.298	0	3843.176	8	0.500	1	-10921639	120.186	119	110	147	11658	6.936	1.791	0.013	0.428
1078	ID37823701	37823701	157	1.240	57.854	79.733	0	4323.573	9	0.500	1	-10921639	119.722	119	109	140	11613	5.601	1.598	0.016	0.658
1079	ID37808897	37808897	158	1.145	133.533	28.830	0	2882.382	6	0.500	1	-10921639	120.608	118	112	146	11699	6.885	0.491	0.006	0.218
1080	ID37626595	37626595	158	1.472	133.365	28.693	0	3362.779	7	0.500	1	-10921639	120.371	118	110	153	11676	7.162	0.480	0.015	0.496
1081	ID37789914	37789914	158	1.197	133.383	28.571	0	3843.176	8	0.500	1	-10921639	120.423	119	108	144	11681	6.489	1.607	0.019	0.698
1082	ID37792521	37792521	158	1.022	133.034	29.226	0	4323.573	9	0.500	1	-10921639	120.103	120	110	141	11650	5.195	0.702	0.006	0.274
1083	ID37667346	37667346	159	1.135	56.901	35.646	0	2401.985	5	0.500	1	-10921639	120.433	120	108	139	11682	5.806	0.485	0.013	0.536
1084	ID37815502	37815502	159	1.308	56.841	35.575	0	2882.382	6	0.500	1	-10921639	121.515	121	112	135	11787	5.530	0.493	0.008	0.332
1085	ID37631056	37631056	159	1.638	57.325	35.671	0	3362.779	7	0.500	1	-10921639	121.258	120	107	183	11762	9.075	0.489	0.015	0.398
1086	ID37792908	37792908	159	1.835	56.512	35.008	0	3843.176	8	0.500	1	-10921639	121.948	120	110	144	11829	7.876	0.486	0.015	0.470
1087	ID37797839	37797839	159	1.460	56.167	34.690	0	4323.573	9	0.500	1	-10921639	120.505	119	109	149	11689	6.895	0.488	0.012	0.425
1088	ID37898449	37898449	160	0.942	192.070	128.918	0	2882.382	6	0.500	1	-10921639	118.794	118	109	136	11523	5.481	1.900	0.007	0.321
1089	ID37693500	37693500	160	1.342	193.756	127.232	0	3362.779	7	0.500	1	-10921639	119.660	120	107	140	11607	6.258	1.807	0.011	0.425
1090	ID37863104	37863104	160	1.427	195.301	127.621	0	3843.176	8	0.500	1	-10921639	119.320	117	106	142	11574	7.346	0.488	0.011	0.355
1091	ID37789153	37789153	161	1.053	203.536	206.865	0	2401.985	5	0.500	1	-10921639	122.639	122	111	141	11896	5.681	1.719	0.013	0.553
1092	ID37952720	37952720	161	1.225	203.573	207.085	0	2882.382	6	0.500	1	-10921639	123.144	122	112	144	11945	5.974	1.900	0.016	0.640
1093	ID37763940	37763940	161	1.583	203.446	207.098	0	3362.779	7	0.500	1	-10921639	124.433	124	112	148	12070	7.316	0.489	0.017	0.582
1094	ID37916885	37916885	161	1.496	203.353	207.499	0	3843.176	8	0.500	1	-10921639	124.206	123	112	164	12048	7.087	0.486	0.014	0.468
1095	ID37869443	37869443	162	1.105	26.935	89.596	0	2882.382	6	0.500	1	-10921639	118.753	118	105	134	11519	5.443	1.900	0.011	0.486
1096	ID37667541	37667541	162	0.971	27.080	89.430	0	3362.779	7	0.500	1	-10921639	119.072	119	106	133	11550	5.374	1.900	0.007	0.326
1097	ID37739167	37739167	163	1.012	90.728	144.835	0	2401.985	5	0.500	1	-10921639	120.495	120	110	144	11688	6.086	0.477	0.009	0.339
1098	ID37913990	37913990	163	1.100	87.347	146.962	0	2882.382	6	0.500	1	-10921639	123.330	123	113	144	11963	5.861	0.485	0.007	0.276
1099	ID37716832	37716832	163	1.154	87.316	147.028	0	3362.779	7	0.500	1	-10921639	122.361	121	110	144	11869	6.119	1.900	0.017	0.666
1100	ID37871089	37871089	163	1.255	87.294	146.599	0	3843.176	8	0.500	1	-10921639	121.938	122	109	141	11828	6.286	1.815	0.020	0.746
1101	ID37866099	37866099	163	1.434	86.331	144.980	0	4323.573	9	0.500	1	-10921639	121.021	119	112	147	11739	6.912	1.608	0.014	0.468
1102	ID37708667	37708667	164	0.973	177.765	100.277	0	2401.985	5	0.500	1	-10921639	117.557	117	109	134	11403	5.391	1.193	0.004	0.183
1103	ID37872521	37872521	164	1.002	177.006	99.728	0	2882.382	6	0.500	1	-10921639	118.701	118	109	135	11514	5.370	0.489	0.009	0.410
1104	ID37674829	37674829	164	1.181	176.921	100.593	0	3362.779	7	0.500	1	-10921639	118.866	119	110	151	11530	6.331	1.900	0.014	0.526
1105	ID37837657	37837657	164	1.287	177.503	100.390	0	3843.176	8	0.500	1	-10921639	119.103	118	108	148	11553	6.179	0.489	0.010	0.392
1106	ID37789751	37789751	165	1.797	181.585	207.602	0	2401.985	5	0.500	1	-10921639	123.845	123	112	148	12013	7.332	1.696	0.021	0.690
1107	ID37952909	37952909	165	1.858	181.473	207.891	0	2882.382	6	0.500	1	-10921639	124.515	123	114	147	12078	7.224	1.900	0.014	0.492
1108	ID37768331	37768331	165	1.293	181.739	207.855	0	3362.779	7	0.500	1	-10921639	123.021	122	112	146	11933	6.228	0.716	0.015	0.600
1109	ID37917195	37917195	165	2.507	181.713	207.736	0	3843.176	8	0.500	1	-10921639	126.330	125	114	151	12254	8.784	0.490	0.023	0.647
1110	ID37910146	37910146	165	1.259	180.767	208.217	0	4323.573	9	0.500	1	-10921639	122.763	122	108	150	11908	7.372	1.900	0.007	0.239
1111	ID37949078	37949078	166	1.035	114.437	168.531	0	2882.382	6	0.500	1	-10921639	121.062	120	111	133	11743	5.530	1.900	0.010	0.425
1112	ID37732958	37732958	166	0.945	114.586	168.612	0	3362.779	7	0.500	1	-10921639	119.907	119	110	138	11631	5.697	0.711	0.008	0.354
1113	ID37668414	37668414	167	1.147	57.597	39.113	0	2401.985	5	0.500	1	-10921639	123.155	122	111	140	11946	5.832	0.703	0.009	0.376
1114	ID37825175	37825175	167	1.550	57.425	39.850	0	2882.382	6	0.500	1	-10921639	124.165	123	113	157	12044	7.211	0.492	0.007	0.226
1115	ID37637549	37637549	167	1.404	57.765	39.813	0	3362.779	7	0.500	1	-10921639	122.186	122	111	144	11852	6.400	0.713	0.017	0.632
1116	ID37794537	37794537	167	1.421	57.805	40.191	0	3843.176	8	0.500	1	-10921639	122.340	121	109	143	11867	6.393	0.494	0.016	0.590
1117	ID37799344	37799344	167	1.003	56.452	39.777	0	4323.573	9	0.500	1	-10921639	120.227	119	109	140	11662	5.292	0.706	0.009	0.427
1118	ID37754400	37754400	168	1.458	13.371	166.620	0	2401.985	5	0.500	1	-10921639	119.588	118	108	147	11600	7.059	0.488	0.013	0.427
1119	ID37948318	37948318	168	1.186	12.986	167.264	0	2882.382	6	0.500	1	-10921639	118.577	117	109	146	11502	6.226	1.774	0.016	0.609
1120	ID37732786	37732786	168	1.032	11.530	168.467	0	3362.779	7	0.500	1	-10921639	120.144	120	108	141	11654	5.772	1.900	0.005	0.192
1121	ID37886982	37886982	168	1.143	11.253	168.171	0	3843.176	8	0.500	1	-10921639	119.588	119	106	139	11600	6.145	1.900	0.012	0.473
1122	ID37895082	37895082	169	1.293	2.196	120.439	0	2882.382	6	0.500	1	-10921639	119.113	118	108	149	11554	6.591	1.797	0.008	0.288
1123	ID37696448	37696448	169	1.029	2.430	120.544	0	3362.779	7	0.500	1	-10921639	117.876	116	108	144	11434	5.842	0.487	0.016	0.633
1124	ID37854421	37854421	169	1.123	2.677	120.517	0	3843.176	8	0.500	1	-10921639	118.732	118	109	139	11517	5.931	0.492	0.011	0.431
1125	ID37851244	37851244	169	0.888	1.999	119.867	0	4323.573	9	0.500	1	-10921639	117.082	116	106	137	11357	5.804	1.808	0.013	0.525
1126	ID37839279	37839279	170	1.141	113.571	63.444	0	2882.382	6	0.500	1	-10921639	123.299	123	109	141	11960	6.005	1.592	0.012	0.484
1127	ID37648261	37648261	170	0.898	113.320	63.708	0	3362.779	7	0.500	1	-10921639	119.784	120	105	139	11619	5.441	1.822	0.009	0.380
1128	ID37669901	37669901	171	1.216	107.912	95.662	0	3362.779	7	0.500	1	-10921639	120.041	119	110	142	11644	6.576	1.900	0.015	0.528
1129	ID37834805	37834805	171	1.404	108.345	95.350	0	3843.176	8	0.500	1	-10921639	120.381	119	108	139	11677	6.844	1.758	0.018	0.614
1130	ID37840260	37840260	171	1.424	107.412	95.177	0	4323.573	9	0.500	1	-10921639	119.814	118	110	142	11622	6.594	1.808	0.018	0.627
1131	ID37731455	37731455	172	0.971	114.275	170.159	0	3362.779	7	0.500	1	-10921639	119.330	118	110	133	11575	5.877	1.810	0.006	0.251
1132	ID37882796	37882796	172	1.009	114.603	170.393	0	3843.176	8	0.500	1	-10921639	118.608	118	108	140	11505	6.231	1.900	0.015	0.556
1133	ID37881617	37881617	172	1.366	114.399	170.897	0	4323.573	9	0.500	1	-10921639	119.856	118	108	144	11626	6.979	0.486	0.017	0.563
1134	ID37613929	37613929	173	1.188	71.742	2.329	0	3362.779	7	0.500	1	-10921639	120.557	119	109	150	11694	6.628	1.387	0.008	0.294
1135	ID37750164	37750164	173	1.440	72.356	1.368	0	3843.176	8	0.500	1	-10921639	120.856	120	107	144	11723	6.909	0.489	0.016	0.548
1136	ID37697117	37697117	174	0.963	76.780	132.342	0	3362.779	7	0.500	1	-10921639	121.670	121	111	141	11802	6.046	1.213	0.006	0.229
1137	ID37859823	37859823	174	1.438	76.936	132.602	0	3843.176	8	0.500	1	-10921639	123.206	122	111	153	11951	7.236	0.485	0.015	0.497
1138	ID37657943	37657943	175	0.994	176.998	76.689	0	3362.779	7	0.500	1	-10921639	120.052	120	112	141	11645	5.067	1.710	0.009	0.440
1139	ID37822204	37822204	175	1.046	177.063	76.852	0	3843.176	8	0.500	1	-10921639	120.392	120	109	137	11678	5.293	0.487	0.009	0.405
1140	ID37820716	37820716	175	1.267	176.430	76.659	0	4323.573	9	0.500	1	-10921639	121.124	120	112	143	11749	5.812	0.705	0.012	0.501
1141	ID37779001	37779001	176	1.051	122.170	219.162	0	3362.779	7	0.500	1	-10921639	123.196	122	113	141	11950	6.104	0.702	0.014	0.570
1142	ID37928734	37928734	176	1.452	121.964	219.367	0	3843.176	8	0.500	1	-10921639	124.175	124	113	139	12045	5.670	0.493	0.015	0.648
1143	ID37923125	37923125	176	1.159	121.273	219.352	0	4323.573	9	0.500	1	-10921639	121.351	120	109	138	11771	6.260	0.488	0.015	0.564
1144	ID37897440	37897440	177	1.700	102.634	186.531	0	3843.176	8	0.500	1	-10921639	121.814	120	109	142	11816	7.775	0.484	0.015	0.458
1145	ID37889601	37889601	177	1.443	102.232	186.298	0	4323.573	9	0.500	1	-10921639	121.206	120	111	143	11757	6.553	0.704	0.014	0.527
1146	ID37666629	37666629	178	1.063	135.751	40.667	0	2401.985	5	0.500	1	-10921639	121.742	120	112	142	11809	6.220	1.391	0.008	0.292
1147	ID37825725	37825725	178	0.918	136.046	40.065	0	2882.382	6	0.500	1	-10921639	121.763	121	112	151	11811	6.319	0.483	0.007	0.285
1148	ID37791592	37791592	178	1.369	135.842	41.540	0	3843.176	8	0.500	1	-10921639	122.361	121	112	148	11869	6.382	1.383	0.014	0.538
1149	ID37799970	37799970	178	0.963	134.281	41.260	0	4323.573	9	0.500	1	-10921639	120.041	119	111	154	11644	6.081	1.688	0.006	0.236
1150	ID37789033	37789033	179	0.932	137.082	38.362	0	3843.176	8	0.500	1	-10921639	119.186	119	109	142	11561	6.044	1.900	0.011	0.421
1151	ID37796776	37796776	179	1.134	137.787	37.451	0	4323.573	9	0.500	1	-10921639	120.144	120	110	135	11654	5.566	0.487	0.010	0.430
1152	ID37747988	37747988	180	1.237	135.061	4.419	0	3843.176	8	0.500	1	-10921639	121.062	120	111	160	11743	7.328	1.900	0.013	0.432
1153	ID37779026	37779026	180	1.241	134.833	4.288	0	4323.573	9	0.500	1	-10921639	122.134	120	112	146	11847	7.022	0.466	0.009	0.314
1154	ID37719446	37719446	181	0.962	6.484	116.209	0	2401.985	5	0.500	1	-10921639	118.763	118	110	166	11520	6.734	1.673	0.007	0.235
1155	ID37893890	37893890	181	1.375	5.798	115.632	0	2882.382	6	0.500	1	-10921639	119.505	118	107	146	11592	6.799	0.489	0.019	0.642
1156	ID37853345	37853345	181	1.077	6.848	116.027	0	3843.176	8	0.500	1	-10921639	118.309	117	109	133	11476	5.272	1.900	0.010	0.445
1157	ID37849559	37849559	181	0.922	5.807	117.223	0	4323.573	9	0.500	1	-10921639	116.619	115	107	142	11312	5.982	1.395	0.013	0.497
1158	ID37919289	37919289	182	0.970	73.523	205.280	0	3843.176	8	0.500	1	-10921639	120.433	119	109	144	11682	6.074	0.357	0.009	0.348
1159	ID37918863	37918863	182	1.308	73.201	205.078	0	4323.573	9	0.500	1	-10921639	121.402	120	111	139	11776	6.017	0.486	0.015	0.583
1160	ID37774874	37774874	183	0.935	111.175	195.134	0	2401.985	5	0.500	1	-10921639	120.784	120	112	141	11716	4.927	0.488	0.009	0.442
1161	ID37946181	37946181	183	0.932	110.456	195.217	0	2882.382	6	0.500	1	-10921639	121.495	121	113	137	11785	5.182	1.900	0.012	0.543
